# Supplementary material for: Discovery and Hit-to-Lead Optimization of Benzothiazole Scaffold-Based DNA Gyrase Inhibitors with Potent Activity against Acinetobacter baumannii and Pseudomonas aeruginosa
Source: PubMed Central journal article supplement (PMC9884090; doi:10.1021/acs.jmedchem.2c01597), 2023-01-12
Supplement: jm2c01597_si_001.pdf [file jm2c01597_si_001.pdf]

# Discovery and Hit-to-Lead Optimization of Benzothiazole Scaffold-Based DNA Gyrase Inhibitors with Potent Activity Against *Acinetobacter baumannii* and *Pseudomonas aeruginosa*

Andrej Emanuel Cotman,<sup>1</sup> Martina Durcik,<sup>1</sup> Davide Benedetto Tiz,<sup>1,†</sup> Federica Fulgheri,<sup>1,‡</sup> Daniela Secci,<sup>1,‡</sup> Maša Sterle,<sup>1</sup> Štefan Možina,<sup>1,§</sup> Žiga Skok,<sup>1,§</sup> Nace Zidar,<sup>1</sup> Anamarija Zega,<sup>1</sup> Janez Ilaš,<sup>1</sup> Lucija Peterlin Mašič,<sup>1</sup> Tihomir Tomašič,<sup>1</sup> Diarmaid Hughes,<sup>2</sup> Douglas L. Huseby,<sup>2</sup> Sha Cao,<sup>2</sup> Linnéa Garoff,<sup>2</sup> Talía Berruga Fernández,<sup>2</sup> Paraskevi Giachou,<sup>2</sup> Lisa Crone,<sup>2</sup> Ivailo Simoff,<sup>3</sup> Richard Svensson,<sup>3</sup> Bryndis Birnir,<sup>4</sup> Sergiy V. Korol,<sup>4</sup> Zhe Jin,<sup>4</sup> Francisca Vicente,<sup>5</sup> Maria C. Ramos,<sup>5</sup> Mercedes de la Cruz,<sup>5</sup> Björn Glinghammar,<sup>6</sup> Lena Lenhammar,<sup>7</sup> Sara R. Henderson,<sup>8,†</sup> Julia E. A. Mundy,<sup>8</sup> Anthony Maxwell,<sup>8</sup> Clare E. M. Stevenson,<sup>8</sup> David M. Lawson,<sup>8</sup> Guido V. Janssen,<sup>9</sup> Geert Jan Sterk,<sup>9</sup> Danijel Kikelj\*<sup>1</sup>

<sup>1</sup> University of Ljubljana, Faculty of Pharmacy, Aškerčeva cesta 7, 1000 Ljubljana, Slovenia

<sup>2</sup> Uppsala University, Department of Medical Biochemistry and Microbiology, Husargatan 3, 75123 Uppsala, Sweden

<sup>3</sup> Uppsala University, Drug Optimization and Pharmaceutical Profiling Platform (UDOPP), Department of Pharmacy, Husargatan 3, 75123 Uppsala, Sweden

<sup>4</sup> Uppsala University, Department of Medical Cell Biology, Husargatan 3, 75123 Uppsala, Sweden

<sup>5</sup> Fundación MEDINA, Avenida del Conocimiento 34, Parque Tecnológico Ciencias de la Salud, 18016 Granada, Spain

<sup>6</sup> RISE Research Institutes of Sweden, Department Chemical Process and Pharmaceutical Development, Unit Chemical and Pharmaceutical Safety, 15136 Södertälje, Sweden

<sup>7</sup> Department of Medical Sciences, Uppsala University Hospital, 75185 Uppsala, Sweden

<sup>8</sup> Department of Biochemistry and Metabolism, John Innes Centre, Norwich Research Park, Norwich NR4 7UH, U.K.

<sup>9</sup> Vrije Universiteit Amsterdam, Medicinal Chemistry Division, De Boelelaan 1108, 1081 HZ Amsterdam, The Netherlands

\* danijel.kikelj@ffa.uni-lj.si

## Supporting Information

### Contents

|                                                                                                                                                                                                                                                                                    |    |
|------------------------------------------------------------------------------------------------------------------------------------------------------------------------------------------------------------------------------------------------------------------------------------|----|
| Table S1. MIC <sub>90</sub> Values of Compound <b>1</b> Against MDR Clinical Isolates of <i>Acinetobacter spp.</i> and <i>P. aeruginosa</i> . ....                                                                                                                                 | 3  |
| Table S2. MIC <sub>90</sub> Values of Compound <b>27</b> Against MDR Clinical Isolates of <i>Acinetobacter spp.</i> .....                                                                                                                                                          | 4  |
| Table S3. IC <sub>50</sub> Values Against <i>E. coli</i> , <i>A. baumannii</i> and <i>P. aeruginosa</i> DNA Gyrase and Topoisomerase IV, MICs, Solubility and Free Fraction Data of Analogs of Compound <b>1</b> Containing a Carboxylic Group Surrogate.....                      | 5  |
| Table S4. IC <sub>50</sub> Values Against <i>E. coli</i> , <i>A. baumannii</i> and <i>P. aeruginosa</i> DNA Gyrase and Topoisomerase IV, MICs, Solubility and Free Fraction Data of 5-Aminomethylpyrrole Derivatives of Compound <b>1</b> . ....                                   | 5  |
| Table S5: IC <sub>50</sub> Values Against <i>E. coli</i> , <i>A. baumannii</i> and <i>P. aeruginosa</i> DNA Gyrase and Topoisomerase IV, MICs, Solubility and Free Fraction Data of Derivatives of Compound <b>27</b> with Polar Substituents at the Stereogenic Carbon Atom. .... | 6  |
| Table S6. IC <sub>50</sub> Values Against <i>E. coli</i> , <i>A. baumannii</i> and <i>P. aeruginosa</i> DNA Gyrase and Topoisomerase IV, MICs, Solubility and Free Fraction Data of Analogs of Compound <b>27</b> with Phenyl Group Replacements.....                              | 7  |
| Table S7. IC <sub>50</sub> Values Against <i>E. coli</i> , <i>A. baumannii</i> and <i>P. aeruginosa</i> DNA Gyrase and Topoisomerase IV, MICs, Solubility and Free Fraction Data of Analogs of Compound <b>27</b> with Differently Substituted Pyrrole Ring. ....                  | 8  |
| Table S8. IC <sub>50</sub> Values Against <i>E. coli</i> , <i>A. baumannii</i> and <i>P. aeruginosa</i> DNA Gyrase and Topoisomerase IV, MICs, Solubility and Free Fraction Data of Compounds Resulting from Combined Approaches to Modification of Compound <b>27</b> . ....      | 9  |
| Table S9: IC <sub>50</sub> Values Against <i>E. coli</i> , <i>A. baumannii</i> and <i>P. aeruginosa</i> DNA Gyrase and Topoisomerase IV, MICs, Solubility and Free Fraction Data of Derivatives of Compound <b>27</b> With <i>para</i> Substituted Phenyl Ring.....                | 10 |

|                                                                                                                                                                                                                                                           |    |
|-----------------------------------------------------------------------------------------------------------------------------------------------------------------------------------------------------------------------------------------------------------|----|
| Table S10. Antibacterial Activity of Compounds <b>1–73</b> Against <i>S. aureus</i> and <i>K. pneumoniae</i> .....                                                                                                                                        | 11 |
| Table S11. Plasma Protein Binding of Selected Optimized Derivatives of Compounds <b>1</b> and <b>27</b> . .....                                                                                                                                           | 14 |
| Table S12. X-ray Data Collection and Refinement Statistics for Inhibitor Complexes of <i>E. coli</i> GyrB24 .....                                                                                                                                         | 15 |
| Table S13. X-ray Data Collection and Refinement Statistics for Inhibitor Complexes of <i>Acinetobacter baumannii</i> GyrB23 .....                                                                                                                         | 16 |
| Table S14. X-ray Data Collection and Refinement Statistics for Inhibitor Complexes of <i>Pseudomonas aeruginosa</i> GyrB24 .....                                                                                                                          | 17 |
| Figure S1. Co-crystal structures of novobiocin in complex with <i>A. baumannii</i> GyrB23 and <i>P. aeruginosa</i> GyrB24.                                                                                                                                | 18 |
| Figure S2. hERG, Cav1.2 and Nav1.5 ion channel inhibition assay for Compound <b>1</b> (EBL-2560). .....                                                                                                                                                   | 18 |
| Figure S3. hERG (A), Nav1.5 (B) and Cav1.2 (C) ion channel inhibition assay for Compound <b>27</b> . .....                                                                                                                                                | 19 |
| Figure S4. Mitochondrial toxicity assay of Compound <b>1</b> in HepG2 cells. ....                                                                                                                                                                         | 19 |
| Figure S5. Mitochondrial toxicity assay of Compound <b>27</b> in HepG2 cells. ....                                                                                                                                                                        | 20 |
| Figure S6. Micronucleus test (MNT) results for Compound <b>1</b> (EBL2560). .....                                                                                                                                                                         | 20 |
| Figure S7. Micronucleus test (MNT) results for Compound <b>18</b> . .....                                                                                                                                                                                 | 20 |
| Figure S8. Micronucleus test (MNT) results for Compound <b>27</b> (EBL-2704). .....                                                                                                                                                                       | 20 |
| Figure S9. Mutagenic activity of Compound <b>1</b> (EBL-2560) using <i>S. typhimurium</i> TA100 with and without S9 activation scored on days 3 to 7 of growth (AMES test). .....                                                                         | 21 |
| Figure S10. Mutagenic activity of Compound <b>27</b> (EBL-2704) using <i>S. typhimurium</i> TA100 with (top) and without (bottom) S9 activation (AMES test). Positive controls: 4-NQQ = 4-nitroquinoline- <i>N</i> -oxide; 2-AA = 2-aminoanthracene. .... | 21 |
| Figure S11. Mutagenic activity of Compound <b>31</b> (EBL-2837) using <i>S. typhimurium</i> TA98 with (top) and without (bottom) S9 activation (AMES test). Positive controls: 2-NF = 2-nitrofluorene; 2-AA = 2-aminoanthracene. ....                     | 21 |
| Figure S12. CYP3A4 inhibition assay of Compound <b>1</b> . .....                                                                                                                                                                                          | 22 |
| Figure S13. Metabolism of Compound <b>1</b> (EBL-2560) in human and mouse hepatocytes, and human (HLM) and mouse (MLM) liver microsomes. ....                                                                                                             | 22 |
| Figure S14. Metabolism of Compound <b>27</b> (EBL-2704) in human (left) and mouse (right) hepatocytes. ....                                                                                                                                               | 22 |
| Figure S15. Relationship between cLogP, TPSA, kinetic solubility, and MIC against <i>P. aeruginosa</i> . .....                                                                                                                                            | 23 |
| Figure S16. Relationship between cLogP, TPSA, kinetic solubility, and MIC against <i>S. aureus</i> . .....                                                                                                                                                | 23 |
| NMR Spectra .....                                                                                                                                                                                                                                         | 24 |
| HPLC traces .....                                                                                                                                                                                                                                         | 69 |

Table S1. MIC<sub>90</sub> Values of Compound 1 Against MDR Clinical Isolates of *Acinetobacter* spp. and *P. aeruginosa*.

| Strain ID | species      | MIC <sub>90</sub> [µg/mL]        | Strain ID | species      | MIC <sub>90</sub> [µg/mL] |     |
|-----------|--------------|----------------------------------|-----------|--------------|---------------------------|-----|
| 1         | EN0117       | <i>A. baumannii</i>              | 2         | EN0064       | <i>P. aeruginosa</i>      | 0,5 |
| 2         | EN0118       | <i>A. baumannii</i>              | 1         | EN0065       | <i>P. aeruginosa</i>      | 1   |
| 3         | EN0119       | <i>A. baumannii</i>              | 1         | EN0066       | <i>P. aeruginosa</i>      | 1   |
| 4         | EN0174       | <i>A. pittii or nosocomialis</i> | 0,5       | EN0067       | <i>P. aeruginosa</i>      | 2   |
| 5         | EN0175       | <i>A. baumannii</i>              | 1         | EN0068       | <i>P. aeruginosa</i>      | 1   |
| 6         | EN0176       | <i>A. baumannii</i>              | 1         | EN0069       | <i>P. aeruginosa</i>      | 0,5 |
| 7         | EN0177       | <i>A. baumannii</i>              | 1         | EN0070       | <i>P. aeruginosa</i>      | 2   |
| 8         | EN0178       | <i>A. baumannii</i>              | 0,5       | EN0071       | <i>P. aeruginosa</i>      | 2   |
| 9         | EN0179       | <i>A. baumannii</i>              | <0,125    | EN0072       | <i>P. aeruginosa</i>      | 8   |
| 10        | EN0180       | <i>A. pittii or nosocomialis</i> | 0,25      | EN0073       | <i>P. aeruginosa</i>      | >64 |
| 11        | EN0181       | <i>A. pittii or nosocomialis</i> | 0,5       | EN0074       | <i>P. aeruginosa</i>      | 8   |
| 12        | EN0182       | <i>A. pittii or nosocomialis</i> | 0,5       | EN0075       | <i>P. aeruginosa</i>      | 4   |
| 13        | EN0183       | <i>A. pittii or nosocomialis</i> | 1         | EN0076       | <i>P. aeruginosa</i>      | 2   |
| 14        | EN0184       | <i>A. baumannii</i>              | 2         | EN0077       | <i>P. aeruginosa</i>      | 1   |
| 15        | EN0185       | <i>A. baumannii</i>              | 2         | EN0078       | <i>P. aeruginosa</i>      | 4   |
| 16        | EN0186       | <i>A. baumannii</i>              | 2         | EN0079       | <i>P. aeruginosa</i>      | 8   |
| 17        | EN0187       | <i>A. baumannii</i>              | 2         | EN0129       | <i>P. aeruginosa</i>      | 0,5 |
| 18        | EN0188       | <i>A. baumannii</i>              | 0,5       | EN0215       | <i>P. aeruginosa</i>      | 4   |
| 19        | EN0189       | <i>A. pittii or nosocomialis</i> | 2         | EN0216       | <i>P. aeruginosa</i>      | 16  |
| 20        | EN0190       | <i>A. baumannii</i>              | 2         | EN0217       | <i>P. aeruginosa</i>      | 4   |
| 21        | EN0191       | <i>A. baumannii</i>              | 1         | EN0218       | <i>P. aeruginosa</i>      | 2   |
| 22        | EN0192       | <i>A. baumannii</i>              | 1         | EN0220       | <i>P. aeruginosa</i>      | 2   |
| 23        | EN0193       | <i>A. baumannii</i>              | 1         | EN0221       | <i>P. aeruginosa</i>      | 4   |
| 24        | EN0194       | <i>A. baumannii</i>              | 2         | EN0222       | <i>P. aeruginosa</i>      | 2   |
| 25        | EN0273       | <i>A. baumannii</i>              | 8         | EN0223       | <i>P. aeruginosa</i>      | 0,5 |
| 26        | EN0274       | <i>A. baumannii</i>              | 16        | EN0224       | <i>P. aeruginosa</i>      | 2   |
| 27        | EN0276       | <i>A. baumannii</i>              | 16        | EN0226       | <i>P. aeruginosa</i>      | 2   |
| 28        | EN0277       | <i>A. baumannii</i>              | 2         | EN0227       | <i>P. aeruginosa</i>      | 4   |
| 29        | EN0278       | <i>A. baumannii</i>              | 8         | EN0228       | <i>P. aeruginosa</i>      | 4   |
| 30        | EN0279       | <i>A. baumannii</i>              | 2         | EN0230       | <i>P. aeruginosa</i>      | 2   |
| 31        | EN0280       | <i>A. baumannii</i>              | 1         | EN0231       | <i>P. aeruginosa</i>      | 8   |
| 32        | EN0281       | <i>A. baumannii</i>              | 1         | EN0232       | <i>P. aeruginosa</i>      | 4   |
| 33        | EN0282       | <i>A. baumannii</i>              | 2         | EN0337       | <i>P. aeruginosa</i>      | 4   |
| 34        | EN0283       | <i>A. baumannii</i>              | 1         | EN0338       | <i>P. aeruginosa</i>      | 2   |
| 35        | EN0284       | <i>A. baumannii</i>              | 1         | EN0339       | <i>P. aeruginosa</i>      | 4   |
| 36        | EN0285       | <i>A. baumannii</i>              | 2         | EN0340       | <i>P. aeruginosa</i>      | 2   |
| 37        | EN0286       | <i>A. baumannii</i>              | 1         | EN0341       | <i>P. aeruginosa</i>      | 4   |
| 38        | EN0287       | <i>A. baumannii</i>              | 1         | EN0342       | <i>P. aeruginosa</i>      | 8   |
| 39        | EN0288       | <i>A. baumannii</i>              | 1         | EN0343       | <i>P. aeruginosa</i>      | 4   |
| 40        | EN0289       | <i>A. baumannii</i>              | 1         | EN0344       | <i>P. aeruginosa</i>      | 8   |
| 41        | EN0290       | <i>A. baumannii</i>              | 1         | EN0345       | <i>P. aeruginosa</i>      | 2   |
| 42        | EN0291       | <i>A. baumannii</i>              | 1         | EN0346       | <i>P. aeruginosa</i>      | 4   |
| 43        | EN0292       | <i>A. baumannii</i>              | 1         | EN0347       | <i>P. aeruginosa</i>      | 8   |
| 44        | EN0293       | <i>A. baumannii</i>              | 2         | EN0348       | <i>P. aeruginosa</i>      | 4   |
| 45        | EN0294       | <i>A. baumannii</i>              | 2         | EN0349       | <i>P. aeruginosa</i>      | 2   |
| 46        | EN0295       | <i>A. baumannii</i>              | 4         | EN0350       | <i>P. aeruginosa</i>      | 2   |
| 47        | EN0296       | <i>A. baumannii</i>              | 2         | EN0351       | <i>P. aeruginosa</i>      | 4   |
| 48        | EN0297       | <i>A. baumannii</i>              | 2         | EN0352       | <i>P. aeruginosa</i>      | 2   |
| 49        | EN0298       | <i>A. baumannii</i>              | 2         | EN0407       | <i>P. aeruginosa</i>      | 4   |
| 50        | EN0299       | <i>A. baumannii</i>              | 1         | EN0408       | <i>P. aeruginosa</i>      | 4   |
| 51        | EN0300       | <i>A. baumannii</i>              | 2         | EN0409       | <i>P. aeruginosa</i>      | 1   |
| 52        | EN0301       | <i>A. baumannii</i>              | 1         | EN0410       | <i>P. aeruginosa</i>      | 0,5 |
| 53        | EN0427       | <i>A. baumannii</i>              | 2         | EN0411       | <i>P. aeruginosa</i>      | 2   |
| 54        | EN0428       | <i>A. baumannii</i>              | 0,5       | EN0412       | <i>P. aeruginosa</i>      | 4   |
| 55        | EN0429       | <i>A. baumannii</i>              | 2         | EN0413       | <i>P. aeruginosa</i>      | 4   |
| 56        | EN0430       | <i>A. baumannii</i>              | 2         | EN0414       | <i>P. aeruginosa</i>      | 0,5 |
| 57        | EN0431       | <i>A. baumannii</i>              | 0,25      | EN0415       | <i>P. aeruginosa</i>      | 4   |
| 58        | EN0432       | <i>A. baumannii</i>              | 8         | EN0416       | <i>P. aeruginosa</i>      | 4   |
| 59        | EN0433       | <i>A. baumannii</i>              | 1         | EN0418       | <i>P. aeruginosa</i>      | 4   |
| 60        | EN0434       | <i>A. baumannii</i>              | 1         | EN0419       | <i>P. aeruginosa</i>      | 2   |
| 61        | EN0435       | <i>A. baumannii</i>              | 2         | EN0420       | <i>P. aeruginosa</i>      | 16  |
| 62        | EN0795       | <i>A. baumannii</i>              | 2         | EN0422       | <i>P. aeruginosa</i>      | 4   |
| 63        | EN0800       | <i>A. baumannii</i>              | 1         | EN0423       | <i>P. aeruginosa</i>      | 4   |
| 64        | EN0801       | <i>A. baumannii</i>              | 2         | EN0425       | <i>P. aeruginosa</i>      | 4   |
|           | <b>MIC90</b> | <b>8</b>                         |           | <b>MIC90</b> | <b>2</b>                  |     |

Table S2. MIC<sub>90</sub> Values of Compound 27 Against MDR Clinical Isolates of *Acinetobacter* spp.

|    | Strain ID    | species                          | MIC <sub>90</sub> [µg/mL] |
|----|--------------|----------------------------------|---------------------------|
| 1  | EN0117       | <i>A. baumannii</i>              | 1                         |
| 2  | EN0118       | <i>A. baumannii</i>              | 1                         |
| 3  | EN0119       | <i>A. baumannii</i>              | 2                         |
| 4  | EN0174       | <i>A. pittii or nosocomialis</i> | 0,5                       |
| 5  | EN0175       | <i>A. baumannii</i>              | 2                         |
| 6  | EN0176       | <i>A. baumannii</i>              | 1                         |
| 7  | EN0177       | <i>A. baumannii</i>              | 1                         |
| 8  | EN0178       | <i>A. baumannii</i>              | 0,5                       |
| 9  | EN0179       | <i>A. baumannii</i>              | 0,125                     |
| 10 | EN0180       | <i>A. pittii or nosocomialis</i> | 0,5                       |
| 11 | EN0181       | <i>A. pittii or nosocomialis</i> | 2                         |
| 12 | EN0182       | <i>A. pittii or nosocomialis</i> | 0,25                      |
| 13 | EN0183       | <i>A. pittii or nosocomialis</i> | 1                         |
| 14 | EN0184       | <i>A. baumannii</i>              | 1                         |
| 15 | EN0185       | <i>A. baumannii</i>              | 1                         |
| 16 | EN0186       | <i>A. baumannii</i>              | 0,5                       |
| 17 | EN0187       | <i>A. baumannii</i>              | 2                         |
| 18 | EN0188       | <i>A. baumannii</i>              | 0,5                       |
| 19 | EN0189       | <i>A. pittii or nosocomialis</i> | 2                         |
| 20 | EN0190       | <i>A. baumannii</i>              | 2                         |
| 21 | EN0191       | <i>A. baumannii</i>              | 2                         |
| 22 | EN0192       | <i>A. baumannii</i>              | 1                         |
| 23 | EN0193       | <i>A. baumannii</i>              | 0,5                       |
| 24 | EN0194       | <i>A. baumannii</i>              | 1                         |
| 25 | EN0273       | <i>A. baumannii</i>              | 0,5                       |
| 26 | EN0274       | <i>A. baumannii</i>              | 0,5                       |
| 27 | EN0276       | <i>A. baumannii</i>              | 0,5                       |
| 28 | EN0277       | <i>A. baumannii</i>              | 0,5                       |
| 29 | EN0278       | <i>A. baumannii</i>              | 0,5                       |
| 30 | EN0279       | <i>A. baumannii</i>              | 1                         |
| 31 | EN0280       | <i>A. baumannii</i>              | 0,5                       |
| 32 | EN0281       | <i>A. baumannii</i>              | 0,5                       |
| 33 | EN0282       | <i>A. baumannii</i>              | 0,5                       |
| 34 | EN0283       | <i>A. baumannii</i>              | 0,5                       |
| 35 | EN0284       | <i>A. baumannii</i>              | 0,5                       |
| 36 | EN0285       | <i>A. baumannii</i>              | 1                         |
| 37 | EN0286       | <i>A. baumannii</i>              | 1                         |
| 38 | EN0287       | <i>A. baumannii</i>              | 0,5                       |
| 39 | EN0288       | <i>A. baumannii</i>              | 0,5                       |
| 40 | EN0289       | <i>A. baumannii</i>              | 0,5                       |
| 41 | EN0290       | <i>A. baumannii</i>              | 1                         |
| 42 | EN0291       | <i>A. baumannii</i>              | 0,5                       |
| 43 | EN0292       | <i>A. baumannii</i>              | 1                         |
| 44 | EN0293       | <i>A. baumannii</i>              | 2                         |
| 45 | EN0294       | <i>A. baumannii</i>              | 0,5                       |
| 46 | EN0295       | <i>A. baumannii</i>              | 1                         |
| 47 | EN0296       | <i>A. baumannii</i>              | 1                         |
| 48 | EN0297       | <i>A. baumannii</i>              | 2                         |
| 49 | EN0298       | <i>A. baumannii</i>              | 1                         |
| 50 | EN0299       | <i>A. baumannii</i>              | 1                         |
| 51 | EN0300       | <i>A. baumannii</i>              | 2                         |
| 52 | EN0301       | <i>A. baumannii</i>              | 1                         |
| 53 | EN0427       | <i>A. baumannii</i>              | 2                         |
| 54 | EN0428       | <i>A. baumannii</i>              | 1                         |
| 55 | EN0429       | <i>A. baumannii</i>              | 2                         |
| 56 | EN0430       | <i>A. baumannii</i>              | 2                         |
| 57 | EN0431       | <i>A. baumannii</i>              | 0,5                       |
| 58 | EN0432       | <i>A. baumannii</i>              | 2                         |
| 59 | EN0433       | <i>A. baumannii</i>              | 2                         |
| 60 | EN0434       | <i>A. baumannii</i>              | 1                         |
| 61 | EN0435       | <i>A. baumannii</i>              | 2                         |
|    | <b>MIC90</b> |                                  | <b>2</b>                  |

Table S3. IC<sub>50</sub> Values Against *E. coli*, *A. baumannii* and *P. aeruginosa* DNA Gyrase and Topoisomerase IV, MICs, Solubility and Free Fraction Data of Analogs of Compound 1 Containing a Carboxylic Group Surrogate.

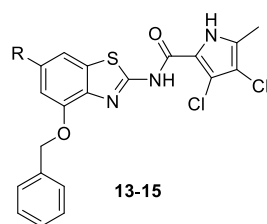

| Cpd.      | R | LogD/<br>LogP<br>Calc. | TPSA<br>[Å <sup>2</sup> ]<br>Calc. | <i>E. coli</i> <sup>a</sup>               |                                            |                                 | <i>A. baumannii</i> <sup>b</sup>          |                                                         |                                 | <i>P. aeruginosa</i> <sup>c</sup>         |                                                         |                                 | Solu-<br>bility<br>[μM] | Free<br>fraction<br>[%]<br>human/<br>mouse |
|-----------|---|------------------------|------------------------------------|-------------------------------------------|--------------------------------------------|---------------------------------|-------------------------------------------|---------------------------------------------------------|---------------------------------|-------------------------------------------|---------------------------------------------------------|---------------------------------|-------------------------|--------------------------------------------|
|           |   |                        |                                    | <i>Gyrase</i><br>IC <sub>50</sub><br>[nM] | <i>Topo IV</i><br>IC <sub>50</sub><br>[nM] | MIC<br>[μg/mL]<br>WT<br>(Δeff.) | <i>Gyrase</i><br>IC <sub>50</sub><br>[nM] | <i>Topo IV</i><br>IC <sub>50</sub><br>[nM] <sup>e</sup> | MIC<br>[μg/mL]<br>WT<br>(Δeff.) | <i>Gyrase</i><br>IC <sub>50</sub><br>[nM] | <i>Topo IV</i><br>IC <sub>50</sub><br>[nM] <sup>e</sup> | MIC<br>[μg/mL]<br>WT<br>(Δeff.) |                         |                                            |
| <b>13</b> |   | -/<br>4.30             | 117.8                              | <10                                       | 680                                        | >64<br>(16)                     | n.d.                                      | n.d.                                                    | 64<br>(n.d.)                    | n.d.                                      | n.d.                                                    | >64<br>(1)                      | n.d.                    | n.d./<br>n.d.                              |
| <b>14</b> |   | 5.24/<br>5.55          | 117.7                              | <10                                       | n.d.                                       | >64<br>(>64)                    | 31±12                                     | n.d.                                                    | >64<br>(n.d.)                   | 14±4                                      | n.d.                                                    | >64<br>(>64)                    | <1 <sup>d</sup>         | n.d.<br>n.d.                               |
| <b>15</b> |   | 4.42/<br>4.42          | 122.1                              | 16±11                                     | n.d.                                       | >64<br>(64)                     | 351±40                                    | n.d.                                                    | 32<br>(n.d.)                    | 226±86                                    | n.d.                                                    | 64<br>(>64)                     | n.d.                    | <0.1/<br><0.1                              |

<sup>a</sup>*E. coli* ATCC5922 (wild type), CH3130 (efflux-defective; ΔtolC mutant isogenic to ATCC25922); <sup>b</sup>*A. baumannii* ATCC19606 (wild type), BM4652 (efflux-defective derivative of BM4454); <sup>c</sup>*P. aeruginosa* PAO1 (wild type), PAO750 (efflux-defective isogenic to PAO1); <sup>d</sup> kinetic solubility; <sup>e</sup>gel-based assay; TPSA = total polar surface area; Calc. = calculated; n.d. = not determined; WT = wild type; Δeff. = efflux-defective strain.

Table S4. IC<sub>50</sub> Values Against *E. coli*, *A. baumannii* and *P. aeruginosa* DNA Gyrase and Topoisomerase IV, MICs, Solubility and Free Fraction Data of 5-Aminomethylpyrrole Derivatives of Compound 1.

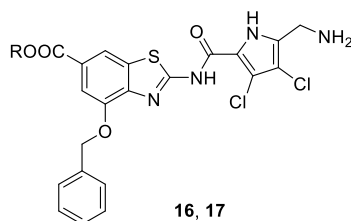

| Cpd.      | R               | LogD/<br>LogP<br>Calc. | TPSA<br>[Å <sup>2</sup> ]<br>Calc. | <i>E. coli</i> <sup>a</sup>               |                                            |                                 | <i>A. baumannii</i> <sup>b</sup>          |                                                         |                                 | <i>P. aeruginosa</i> <sup>c</sup>         |                                                         |                                 | Solu-<br>bility<br>[μM] | Free<br>fraction<br>[%]<br>human/<br>mouse |
|-----------|-----------------|------------------------|------------------------------------|-------------------------------------------|--------------------------------------------|---------------------------------|-------------------------------------------|---------------------------------------------------------|---------------------------------|-------------------------------------------|---------------------------------------------------------|---------------------------------|-------------------------|--------------------------------------------|
|           |                 |                        |                                    | <i>Gyrase</i><br>IC <sub>50</sub><br>[nM] | <i>Topo IV</i><br>IC <sub>50</sub><br>[nM] | MIC<br>[μg/mL]<br>WT<br>(Δeff.) | <i>Gyrase</i><br>IC <sub>50</sub><br>[nM] | <i>Topo IV</i><br>IC <sub>50</sub><br>[nM] <sup>e</sup> | MIC<br>[μg/mL]<br>WT<br>(Δeff.) | <i>Gyrase</i><br>IC <sub>50</sub><br>[nM] | <i>Topo IV</i><br>IC <sub>50</sub><br>[nM] <sup>e</sup> | MIC<br>[μg/mL]<br>WT<br>(Δeff.) |                         |                                            |
| <b>16</b> | H               | 2.03/<br>2.10          | 130.3                              | <10                                       | not<br>active                              | >64<br>(>64)                    | 487±141                                   | 3000±640                                                | >64<br>(n.d.)                   | 1140±398                                  | 5165±585                                                | 64<br>(n.d.)                    | <1 <sup>d</sup>         | 0.59<br><0.1 <sup>f</sup>                  |
| <b>17</b> | CH <sub>3</sub> | 3.96/<br>4.71          | 119.3                              | 22200±4800                                | n.d.                                       | >64<br>(>64)                    | n.d.                                      | n.d.                                                    | >64<br>(n.d.)                   | n.d.                                      | n.d.                                                    | >64<br>(>64)                    | <1 <sup>d</sup>         | <0.1<br>0 <sup>f</sup>                     |

<sup>a</sup>*E. coli* ATCC5922 (wild type), CH3130 (efflux-defective; ΔtolC mutant isogenic to ATCC25922); <sup>b</sup>*A. baumannii* ATCC19606 (wild type), BM4652 (efflux-defective derivative of BM4454); <sup>c</sup>*P. aeruginosa* PAO1 (wild type), PAO750 (efflux-defective isogenic to PAO1); <sup>d</sup> kinetic solubility; <sup>e</sup>gel-based assay; <sup>f</sup>The results should be interpreted carefully due to low recovery; TPSA = total polar surface area; Calc. = calculated; n.d. = not determined; WT = wild type; Δeff. = efflux-defective strain.

Table S5: IC<sub>50</sub> Values Against *E. coli*, *A. baumannii* and *P. aeruginosa* DNA Gyrase and Topoisomerase IV, MICs, Solubility and Free Fraction Data of Derivatives of Compound 27 with Polar Substituents at the Stereogenic Carbon Atom.

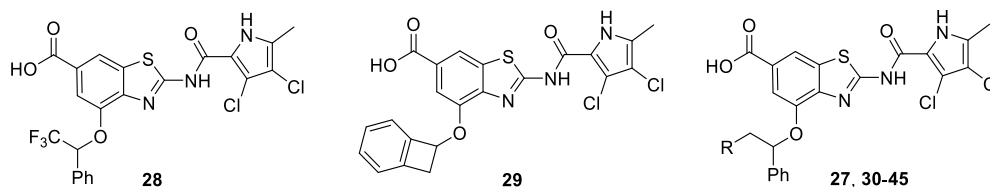

| Cpd. | R                                                                | LogD/<br>LogP<br>Calc. | TPSA<br>[Å <sup>2</sup> ]<br>Calc. | <i>E. coli</i> <sup>a</sup>        |                                     |                                 | <i>A. baumannii</i> <sup>b</sup>   |                                                  |                                 | <i>P. aeruginosa</i> <sup>c</sup>  |                                                  |                                 | Solu-<br>bility<br>[μM]             | Free<br>fraction<br>[%]<br>human/<br>mouse |
|------|------------------------------------------------------------------|------------------------|------------------------------------|------------------------------------|-------------------------------------|---------------------------------|------------------------------------|--------------------------------------------------|---------------------------------|------------------------------------|--------------------------------------------------|---------------------------------|-------------------------------------|--------------------------------------------|
|      |                                                                  |                        |                                    | Gyrase<br>IC <sub>50</sub><br>[nM] | Topo IV<br>IC <sub>50</sub><br>[nM] | MIC<br>[μg/mL]<br>WT<br>(Δeff.) | Gyrase<br>IC <sub>50</sub><br>[nM] | Topo IV<br>IC <sub>50</sub><br>[nM] <sup>f</sup> | MIC<br>[μg/mL]<br>WT<br>(Δeff.) | Gyrase<br>IC <sub>50</sub><br>[nM] | Topo IV<br>IC <sub>50</sub><br>[nM] <sup>f</sup> | MIC<br>[μg/mL]<br>WT<br>(Δeff.) |                                     |                                            |
| 27   | H                                                                | 2.59/<br>5.94          | 104.3                              | <10                                | 318±94                              | 1/<br>(0.125)                   | 16±2                               | 6.7±0.5                                          | 0.5/<br>(0.5)                   | <10                                | 29±1                                             | 1/<br>(0.125)                   | >80 <sup>d</sup><br>92 <sup>e</sup> | 0.016/<br>0.01                             |
| 28   | -                                                                | 3.19/<br>6.54          | 104.3                              | <10                                | 54±8                                | 16/<br>(<0.125)                 | <10                                | 16±1                                             | 4/<br>(0.5)                     | <10                                | 24±1                                             | >64/<br>(0.25)                  | n.d.                                | <0.1 <sup>g</sup> /<br><0.1 <sup>g</sup>   |
| 29   | -                                                                | 2.27/<br>5.62          | 104.3                              | <10                                | n.d.                                | >64/<br>(<0.125)                | <10                                | 22±1                                             | 1/<br>(n.d.)                    | <10                                | 196±3                                            | >64/<br>(0.5)                   | n.d.                                | n.d./<br>n.d.                              |
| 30   | OH                                                               | 1.54/<br>4.89          | 124.5                              | <10                                | n.d.                                | 8/<br>(0.125)                   | <10                                | 19±3                                             | 4/<br>(0.125)                   | <10                                | 43±8                                             | 32/<br>(0.5)                    | 22 <sup>d</sup><br>14 <sup>e</sup>  | <0.1/<br>0.1                               |
| 31   | OCH <sub>3</sub>                                                 | 2.19/<br>5.53          | 113.5                              | <10                                | n.d.                                | 1/<br>(<0.125)                  | <10                                | 4.5±0.9                                          | 0.5/<br>(n.d.)                  | <10                                | 19±1                                             | 2/<br>(0.25)                    | <1 <sup>d</sup><br>12 <sup>e</sup>  | <0.1/<br>0.1                               |
| 32   | SO <sub>2</sub> CH <sub>3</sub>                                  | 0.91/<br>4.26          | 138.5                              | <10                                | n.d.                                | >64/<br>(<0.125)                | <10                                | n.d.                                             | >64/<br>(n.d.)                  | <10                                | n.d.                                             | >64/<br>(2)                     | 16 <sup>d</sup>                     | 0.05 <sup>g</sup> /<br>4.32 <sup>g</sup>   |
| 33   | NH <sub>2</sub>                                                  | 2.51/<br>2.52          | 130.3                              | <10                                | n.d.                                | >64/<br>(0.5)                   | <10                                | n.d.                                             | >64/<br>(n.d.)                  | <10                                | n.d.                                             | >64/<br>(1)                     | 90 <sup>d</sup>                     | 0.28/<br>0.53 <sup>g</sup>                 |
| 34   | N(CH <sub>3</sub> ) <sub>2</sub>                                 | 2.84/<br>2.87          | 107.5                              | <10                                | 77±42                               | 4/<br>(<0.125)                  | <10                                | 18±4                                             | 8/<br>(<0.125)                  | <10                                | 27±2                                             | 16/<br>(<0.125)                 | 16 <sup>d</sup>                     | n.d./<br>n.d.                              |
| 35   |                                                                  | 3.71/<br>3.72          | 107.6                              | <10                                | n.d.                                | 2/<br>(<0.125)                  | <10                                | 25±1                                             | 4/<br>(0.25)                    | <10                                | 26±5                                             | 8/<br>(0.25)                    | 14 <sup>d</sup>                     | n.d./<br>n.d.                              |
| 36   |                                                                  | 2.26/<br>2.74          | 116.8                              | <10                                | n.d.                                | 2/<br>(0.125)                   | <10                                | 11±2                                             | 2/<br>(n.d.)                    | <10                                | 28±1                                             | 8/<br>(2)                       | 35 <sup>d</sup><br>3 <sup>e</sup>   | <0.1/<br>0.3 <sup>e</sup>                  |
| 37   | N <sup>+</sup> (CH <sub>3</sub> ) <sub>3</sub><br>Γ <sup>-</sup> | 2.84/<br>2.87          | 107.5                              | <10                                | n.d.                                | 32/<br>(2)                      | <10                                | n.d.                                             | >64/<br>(n.d.)                  | <10                                | n.d.                                             | >64/<br>(2)                     | 10 <sup>d</sup>                     | n.d./<br>n.d.                              |
| 38   | NHAc                                                             | 1.25/<br>4.60          | 133.4                              | <10                                | n.d.                                | >64/<br>(<0.125)                | <10                                | n.d.                                             | >64/<br>(n.d.)                  | <10                                | n.d.                                             | >64/<br>(16)                    | <1 <sup>d</sup>                     | 0.06 <sup>g</sup> /<br>0.23 <sup>g</sup>   |
| 39   | NHBoc                                                            | 2.93/<br>6.28          | 142.6                              | <10                                | n.d.                                | 2/<br>(0.25)                    | 16±5                               | 1.7±0.2                                          | 2/<br>(n.d.)                    | <10                                | 16±1                                             | 4/<br>(2)                       | 14 <sup>d</sup>                     | 1.61 <sup>g</sup> /<br><0.01 <sup>g</sup>  |
| 40   |                                                                  | 1.78/<br>4.99          | 135.0                              | <10                                | n.d.                                | 64/<br>(0.25)                   | 25±4                               | n.d.                                             | >64/<br>(n.d.)                  | 17±6                               | n.d.                                             | >64/<br>(16)                    | 19 <sup>d</sup>                     | n.d./<br>n.d.                              |
| 41   |                                                                  | 2.21/<br>2.49          | 133.6                              | <10                                | n.d.                                | 16/<br>(0.5)                    | <10                                | n.d.                                             | >64/<br>(n.d.)                  | <10                                | n.d.                                             | >64/<br>(2)                     | 4 <sup>d</sup>                      | n.d./<br>n.d.                              |
| 42   |                                                                  | 2.80/<br>2.86          | 110.8                              | n.d.                               | n.d.                                | >64/<br>(1)                     | 31±8                               | n.d.                                             | >64/<br>(n.d.)                  | 32±15                              | n.d.                                             | >64/<br>(16)                    | 4 <sup>d</sup>                      | <0.1/<br>0.3                               |
| 43   |                                                                  | 3.55/<br>3.57          | 145.9                              | <10                                | n.d.                                | 8/<br>(0.25)                    | <10                                | n.d.                                             | >64/<br>(n.d.)                  | <10                                | n.d.                                             | >64/<br>(4)                     | 4 <sup>d</sup>                      | n.d./<br>n.d.                              |
| 44   |                                                                  | 2.63/<br>2.72          | 110.8                              | <10                                | n.d.                                | >64/<br>(2)                     | 14±3                               | n.d.                                             | >64/<br>(n.d.)                  | 17±6                               | n.d.                                             | >64/<br>(8)                     | 12 <sup>d</sup>                     | n.d./<br>n.d.                              |
| 45   |                                                                  | 2.05/<br>1.44          | 107.6                              | <10                                | -                                   | >64/<br>(4)                     | <10                                | n.d.                                             | >64/<br>(n.d.)                  | <10                                | n.d.                                             | >64/<br>(8)                     | 23 <sup>d</sup>                     | 0.3/<br>1.9                                |

<sup>a</sup>*E. coli* ATCC5922 (wild type), CH3130 (efflux-defective;  $\Delta$ tolC mutant isogenic to ATCC25922); <sup>b</sup>*A. baumannii* ATCC19606 (wild type), BM4652 (efflux-defective derivative of BM4454); <sup>c</sup>*P. aeruginosa* PAO1 (wild type), PAO750 (efflux-defective isogenic to PAO1); <sup>d</sup>kinetic solubility; <sup>e</sup>thermodynamic solubility; <sup>f</sup>gel-based assay; <sup>g</sup>The results should be interpreted carefully due to low recovery; TPSA = total polar surface area; Calc. = calculated; n.d. = not determined; WT = wild type;  $\Delta$ eff. = efflux-defective strain.

Table S6. IC<sub>50</sub> Values Against *E. coli*, *A. baumannii* and *P. aeruginosa* DNA Gyrase and Topoisomerase IV, MICs, Solubility and Free Fraction Data of Analogs of Compound 27 with Phenyl Group Replacements.

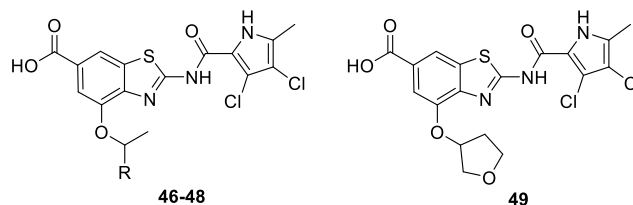

| Cpd. | R           | LogD/<br>LogP<br>Calc. | TPSA<br>[Å <sup>2</sup> ]<br>Calc. | <i>E. coli</i> <sup>a</sup>               |                                            |                                          | <i>A. baumannii</i> <sup>b</sup>          |                                                         |                                          | <i>P. aeruginosa</i> <sup>c</sup>         |                                                         |                                          | Solu-<br>bility<br>[μM]             | Free<br>fraction<br>[%]<br>human/<br>mouse |
|------|-------------|------------------------|------------------------------------|-------------------------------------------|--------------------------------------------|------------------------------------------|-------------------------------------------|---------------------------------------------------------|------------------------------------------|-------------------------------------------|---------------------------------------------------------|------------------------------------------|-------------------------------------|--------------------------------------------|
|      |             |                        |                                    | <i>Gyrase</i><br>IC <sub>50</sub><br>[nM] | <i>Topo IV</i><br>IC <sub>50</sub><br>[nM] | MIC<br>[μg/mL]<br>WT<br>( $\Delta$ eff.) | <i>Gyrase</i><br>IC <sub>50</sub><br>[nM] | <i>Topo IV</i><br>IC <sub>50</sub><br>[nM] <sup>f</sup> | MIC<br>[μg/mL]<br>WT<br>( $\Delta$ eff.) | <i>Gyrase</i><br>IC <sub>50</sub><br>[nM] | <i>Topo IV</i><br>IC <sub>50</sub><br>[nM] <sup>f</sup> | MIC<br>[μg/mL]<br>WT<br>( $\Delta$ eff.) |                                     |                                            |
| 27   | Ph          | 2.59/<br>5.94          | 104                                | <10                                       | 318±94                                     | 1<br>(0.125)                             | 16±2                                      | 6.7±0.5                                                 | 0.5<br>(0.5)                             | <10                                       | 29±1                                                    | 1<br>(0.125)                             | >80 <sup>d</sup><br>92 <sup>e</sup> | 0.016<br>0.01                              |
| 46   | Me          | 1.22/<br>4.57          | 104                                | <10                                       | 84±12                                      | 4<br>(<0.125)                            | <10                                       | 67±11                                                   | 1<br>(0.5)                               | <10                                       | 69±3                                                    | 8<br>(0.125)                             | 35 <sup>d</sup>                     | <0.1<br><0.1                               |
| 47   | <i>i</i> Pr | 2.11/<br>5.46          | 104                                | <10                                       | n.d.                                       | 1<br>(<0.125)                            | <10                                       | 60±1                                                    | 1<br>(1)                                 | <10                                       | 200±40                                                  | 2<br>(<0.125)                            | 29 <sup>d</sup>                     | <0.1<br><0.1                               |
| 48   | cyclopropyl | 1.65/<br>4.99          | 104                                | <10                                       | n.d.                                       | 4<br>(<0.125)                            | <10                                       | 50±5                                                    | 1<br>(1)                                 | <10                                       | 58±1                                                    | 4<br>(<0.125)                            | 35 <sup>d</sup>                     | <0.1<br><0.1                               |
| 49   | -           | 0.35/<br>3.70          | 114                                | <10                                       | 58±15                                      | >64<br>(<0.125)                          | <10                                       | n.d.                                                    | 64<br>(n.d.)                             | <10                                       | n.d.                                                    | >64<br>(8)                               | 35 <sup>d</sup>                     | 0.03 <sup>g</sup><br>0.12 <sup>g</sup>     |

<sup>a</sup>*E. coli* ATCC5922 (wild type), CH3130 (efflux-defective;  $\Delta$ tolC mutant isogenic to ATCC25922); <sup>b</sup>*A. baumannii* ATCC19606 (wild type), BM4652 (efflux-defective derivative of BM4454); <sup>c</sup>*P. aeruginosa* PAO1 (wild type), PAO750 (efflux-defective isogenic to PAO1); <sup>d</sup> kinetic solubility; <sup>e</sup>thermodynamic solubility; <sup>f</sup>gel-based assay; <sup>g</sup> The results should be interpreted carefully due to low recovery; TPSA = total polar surface area; Calc. = calculated; n.d. = not determined; WT = wild type;  $\Delta$ eff. = efflux-defective strain.

Table S7. IC<sub>50</sub> Values Against *E. coli*, *A. baumannii* and *P. aeruginosa* DNA Gyrase and Topoisomerase IV, MICs, Solubility and Free Fraction Data of Analogs of Compound 27 with Differently Substituted Pyrrole Ring.

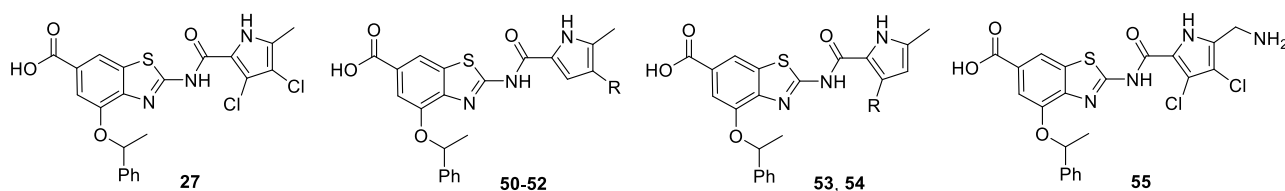

| Cpd. | R  | LogD/<br>LogP<br>Calc. | TPSA<br>[Å <sup>2</sup> ]<br>Calc. | <i>E. coli</i> <sup>a</sup>        |                                     |                                 | <i>A. baumannii</i> <sup>b</sup>   |                                                  |                                 | <i>P. aeruginosa</i> <sup>c</sup>  |                                                  |                                 | Solu-<br>bility<br>[μM]             | Free<br>fraction<br>[%]<br>human/<br>mouse |
|------|----|------------------------|------------------------------------|------------------------------------|-------------------------------------|---------------------------------|------------------------------------|--------------------------------------------------|---------------------------------|------------------------------------|--------------------------------------------------|---------------------------------|-------------------------------------|--------------------------------------------|
|      |    |                        |                                    | Gyrase<br>IC <sub>50</sub><br>[nM] | Topo IV<br>IC <sub>50</sub><br>[nM] | MIC<br>[μg/mL]<br>WT<br>(Δeff.) | Gyrase<br>IC <sub>50</sub><br>[nM] | Topo IV<br>IC <sub>50</sub><br>[nM] <sup>f</sup> | MIC<br>[μg/mL]<br>WT<br>(Δeff.) | Gyrase<br>IC <sub>50</sub><br>[nM] | Topo IV<br>IC <sub>50</sub><br>[nM] <sup>f</sup> | MIC<br>[μg/mL]<br>WT<br>(Δeff.) |                                     |                                            |
| 27   | -  | 2.59/<br>5.94          | 104                                | <10                                | 318±94                              | 1<br>(0.125)                    | 16±2                               | 6.7±0.5                                          | 0.5<br>(0.5)                    | <10                                | 29±1                                             | 1<br>(0.125)                    | >80 <sup>d</sup><br>92 <sup>e</sup> | 0.016/<br>0.01                             |
| 50   | Cl | 1.99/<br>5.33          | 104                                | <10                                | n.d.                                | 16<br>(<0.125)                  | <10                                | 12±1                                             | 64<br>(n.d.)                    | <10                                | 7.3±1.6                                          | 32<br>(1)                       | 23 <sup>d</sup><br>19 <sup>e</sup>  | <0.1/<br><0.1                              |
| 51   | F  | 1.52/<br>4.87          | 104                                | <10                                | 37±12                               | 8<br>(0.5)                      | <10                                | 7.8±1.1                                          | 4<br>(4)                        | <10                                | 9.3±1.1                                          | 4<br>(1)                        | 41 <sup>d</sup><br>18 <sup>e</sup>  | 0.13/<br>0.3                               |
| R-51 | F  | 1.52/<br>4.87          | 104                                | <10                                | n.d.                                | >64/<br>(>64)                   | <10                                | 98±11                                            | 8<br>(1)                        | <10                                | 35±5                                             | >64<br>(<0.125)                 | <1 <sup>d</sup><br>7 <sup>e</sup>   | 0.17/<br>0.7                               |
| S-51 | F  | 1.52/<br>4.87          | 104                                | <10                                | n.d.                                | 8<br>(0.125)                    | <10                                | 5.8±0                                            | 2<br>(0.125)                    | <10                                | 4.1±0.7                                          | 32<br>(0.5)                     | 52 <sup>d</sup><br>20 <sup>e</sup>  | 0.19/<br>0.7                               |
| 52   | CN | 1.24/<br>4.59          | 128                                | <10                                | 126±27                              | >64<br>(16)                     | <10                                | 167±15                                           | >64<br>(n.d.)                   | <10                                | 29±2                                             | >64<br>(>64)                    | 57 <sup>d</sup>                     | 0.4/<br>1.2                                |
| 53   | H  | 1.38/<br>4.73          | 104                                | 17                                 | 51±18                               | >64<br>(0.25)                   | 24±14                              | n.d.                                             | >64<br>(n.d.)                   | <10                                | n.d.                                             | >64<br>(0.25)                   | 3 <sup>d</sup>                      | n.d./<br>n.d.                              |
| 54   | F  | 1.52/<br>4.87          | 104                                | 32                                 | 229±31                              | >64<br>(0.125)                  | 15±12                              | 818±13                                           | 64<br>(n.d.)                    | <10                                | 954±40                                           | >64<br>(1)                      | 30 <sup>d</sup>                     | n.d./<br>n.d.                              |
| 55   | -  | 2.44/<br>2.52          | 130                                | 41                                 | n.d.                                | >64<br>(1)                      | 18±4                               | n.d.                                             | >64<br>(n.d.)                   | 770                                | n.d.                                             | >64<br>(64)                     | 2 <sup>d</sup>                      | 1.28/<br>0.3                               |

<sup>a</sup>*E. coli* ATCC5922 (wild type), CH3130 (efflux-defective; ΔtolC mutant isogenic to ATCC25922); <sup>b</sup>*A. baumannii* ATCC19606 (wild type), BM4652 (efflux-defective derivative of BM4454); <sup>c</sup>*P. aeruginosa* PAO1 (wild type), PAO750 (efflux-defective isogenic to PAO1); <sup>d</sup>kinetic solubility; <sup>e</sup>thermodynamic solubility; <sup>f</sup>gel-based assay; TPSA = total polar surface area; Calc. = calculated; n.d. = not determined; WT = wild type; Δeff. = efflux-defective strain.



Table S8. IC<sub>50</sub> Values Against *E. coli*, *A. baumannii* and *P. aeruginosa* DNA Gyrase and Topoisomerase IV, MICs, Solubility and Free Fraction Data of Compounds Resulting from Combined Approaches to Modification of Compound 27.

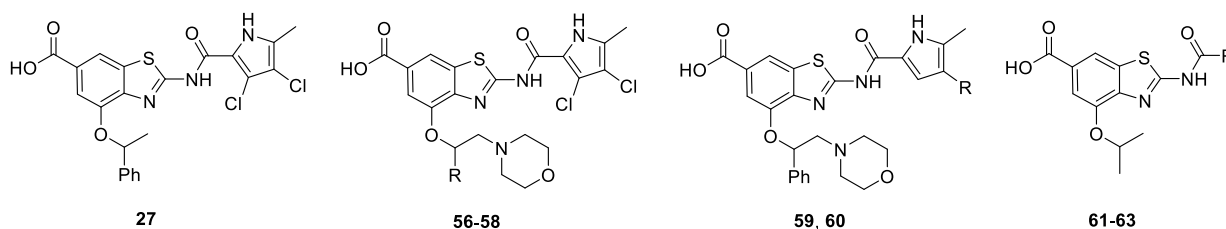

| Cpd. | R               | LogD/<br>LogP<br>Calc. | TPSA<br>[Å <sup>2</sup> ]<br>Calc. | <i>E. coli</i> <sup>a</sup>               |                                            |                                  | <i>A. baumannii</i> <sup>b</sup>          |                                                         |                                  | <i>P. aeruginosa</i> <sup>c</sup>         |                                                         |                                  | Solu-<br>bility<br>[μM]             | Free<br>fraction<br>[%]<br>human/<br>mouse |
|------|-----------------|------------------------|------------------------------------|-------------------------------------------|--------------------------------------------|----------------------------------|-------------------------------------------|---------------------------------------------------------|----------------------------------|-------------------------------------------|---------------------------------------------------------|----------------------------------|-------------------------------------|--------------------------------------------|
|      |                 |                        |                                    | <i>Gyrase</i><br>IC <sub>50</sub><br>[nM] | <i>Topo IV</i><br>IC <sub>50</sub><br>[nM] | MIC<br>[μg/mL]<br>WT/<br>Δefflux | <i>Gyrase</i><br>IC <sub>50</sub><br>[nM] | <i>Topo IV</i><br>IC <sub>50</sub><br>[nM] <sup>f</sup> | MIC<br>[μg/mL]<br>WT/<br>Δefflux | <i>Gyrase</i><br>IC <sub>50</sub><br>[nM] | <i>Topo IV</i><br>IC <sub>50</sub><br>[nM] <sup>f</sup> | MIC<br>[μg/mL]<br>WT/<br>Δefflux |                                     |                                            |
| 27   | -               | 2.59/<br>5.94          | 104.3                              | <10                                       | 318±94                                     | 1/<br>0.125                      | 16±2                                      | 6.7±0.5                                                 | 0.5/<br>0.5                      | <10                                       | 29±1                                                    | 1/<br>0.125                      | >80 <sup>d</sup><br>92 <sup>e</sup> | 0.016/<br>0.01                             |
| 56   | Me              | 0.91/<br>1.37          | 116.8                              | <10                                       | 280±27                                     | >64/<br><0.125                   | <10                                       | 460±0                                                   | >64/<br>n.d.                     | <10                                       | 107±9                                                   | >64/<br>2                        | 62 <sup>d</sup>                     | 0.3/<br>1.5                                |
| 57   | CF <sub>3</sub> | 1.29/<br>2.46          | 116.8                              | n.d.                                      | n.d.                                       | >64/<br>0.125                    | <10                                       | n.d.                                                    | 8/<br>4                          | <10                                       | n.d.                                                    | >64/<br>2                        | 35 <sup>d</sup>                     | 0.13/<br>0.1                               |
| 58   |                 | 1.44/<br>1.74          | 116.8                              | <10                                       | 230±48                                     | 16/<br>0.125                     | <10                                       | 385±38                                                  | 64/<br>n.d.                      | <10                                       | 96±1                                                    | >64/<br>2                        | 57 <sup>d</sup>                     | 0.3/<br>1.3                                |
| 59   | Cl              | 1.66/<br>2.14          | 116.8                              | <10                                       | 171±35                                     | 16/<br>0.125                     | <10                                       | 44±4                                                    | 32/<br>0.25                      | <10                                       | 24±8                                                    | 16/<br>0.125                     | 20 <sup>d</sup><br>70 <sup>e</sup>  | <0.1/<br>0.5                               |
| 60   | F               | 1.20/<br>1.68          | 116.8                              | <10                                       | 39±14                                      | 64/<br>0.125                     | <10                                       | 27±2                                                    | >64/<br>n.d.                     | <10                                       | 22±1                                                    | 64/<br>2                         | 67 <sup>d</sup><br>7 <sup>e</sup>   | 1.5/<br>4.4                                |
| 61   |                 | 0.16/<br>3.51          | 104.3                              | 148±63                                    | 2200±<br>3156                              | >64/<br>0.125                    | 120                                       | n.d.                                                    | >64/<br>n.d.                     | 29±11                                     | n.d.                                                    | >64/<br>>64                      | 3 <sup>d</sup>                      | n.d.                                       |
| 62   |                 | -0.13/<br>3.22         | 128.1                              | 48±1                                      | n.d.                                       | >64/<br>16                       | 25                                        | n.d.                                                    | >64/<br>>64                      | <10                                       | n.d.                                                    | >64/<br>>64                      | 7 <sup>d</sup>                      | n.d.                                       |
| 63   |                 | -0.45/<br>2.48         | 117.2                              | 4290±<br>330                              |                                            | >64/<br>>64                      | n.d.                                      | n.d.                                                    | >64/<br>n.d.                     | 655±195                                   | n.d.                                                    | >64/<br>>64                      | 42 <sup>d</sup>                     | 0.7 <sup>g</sup> /<br>19.9 <sup>g</sup> /  |

<sup>a</sup>*E. coli* ATCC5922 (wild type), CH3130 (efflux-defective; ΔtolC mutant isogenic to ATCC25922); <sup>b</sup>*A. baumannii* ATCC19606 (wild type), BM4652 (efflux-defective derivative of BM4454); <sup>c</sup>*P. aeruginosa* PAO1 (wild type), PAO750 (efflux-defective isogenic to PAO1); <sup>d</sup> kinetic solubility; <sup>e</sup> thermodynamic solubility; <sup>f</sup> gel-based assay; <sup>g</sup> The results should be interpreted carefully due to low recovery; TPSA = total polar surface area; Calc. = calculated; n.d. = not determined; WT = wild type; Δeff. = efflux-defective strain.

Table S9: IC<sub>50</sub> Values Against *E. coli*, *A. baumannii* and *P. aeruginosa* DNA Gyrase and Topoisomerase IV, MICs, Solubility and Free Fraction Data of Derivatives of Compound 27 With *para* Substituted Phenyl Ring.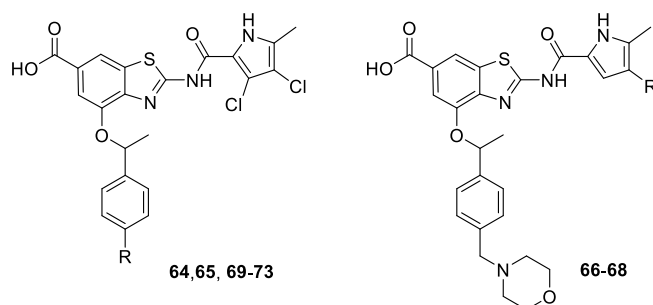

| Cpd.      | R                               | LogD/<br>LogP<br>Calc. | TPSA<br>[Å <sup>2</sup> ]<br>Calc. | <i>E. coli</i> <sup>a</sup>               |                                            |                                 | <i>A. baumannii</i> <sup>b</sup>          |                                                         |                                 | <i>P. aeruginosa</i> <sup>c</sup>         |                                                         |                                 | Solubility<br>[μM]                   | Free<br>fraction<br>[%]<br>human/<br>mouse |
|-----------|---------------------------------|------------------------|------------------------------------|-------------------------------------------|--------------------------------------------|---------------------------------|-------------------------------------------|---------------------------------------------------------|---------------------------------|-------------------------------------------|---------------------------------------------------------|---------------------------------|--------------------------------------|--------------------------------------------|
|           |                                 |                        |                                    | <i>Gyrase</i><br>IC <sub>50</sub><br>[nM] | <i>Topo IV</i><br>IC <sub>50</sub><br>[nM] | MIC<br>[μg/mL]<br>WT<br>(Δeff.) | <i>Gyrase</i><br>IC <sub>50</sub><br>[nM] | <i>Topo IV</i><br>IC <sub>50</sub><br>[nM] <sup>f</sup> | MIC<br>[μg/mL]<br>WT<br>(Δeff.) | <i>Gyrase</i><br>IC <sub>50</sub><br>[nM] | <i>Topo IV</i><br>IC <sub>50</sub><br>[nM] <sup>f</sup> | MIC<br>[μg/mL]<br>WT<br>(Δeff.) |                                      |                                            |
| <b>27</b> | -                               | 2.59/<br>5.94          | 104                                | <10                                       | 318±94                                     | 1<br>(0.125)                    | 16±2                                      | 6.7±0.5                                                 | 0.5<br>(0.5)                    | <10                                       | 29±1                                                    | 1<br>(0.125)                    | >80 <sup>d</sup><br>92 <sup>e</sup>  | 0.016/<br>0.01                             |
| <b>64</b> | SO <sub>2</sub> CH <sub>3</sub> | 1.43/<br>4.78          | 138                                | <10                                       | n.d.                                       | 32<br>(<0.125)                  | <10                                       | n.d.                                                    | 32<br>(n.d.)                    | <10                                       | n.d.                                                    | >64<br>(4)                      | 7 <sup>d</sup>                       | 0.01/<br>3.25                              |
| <b>65</b> |                                 | 2.56/<br>3.01          | 117                                | <10                                       | 107±55                                     | 4<br>(0.125)                    | <10                                       | 26±1                                                    | 2<br>(n.d.)                     | <10                                       | 101±3                                                   | 8<br>(2)                        | 30 <sup>d</sup><br>25 <sup>e</sup>   | <0.1/<br><0.1                              |
| <b>66</b> | Cl                              | 1.95/<br>2.41          | 117                                | <10                                       | 44±1                                       | 16<br>(0.125)                   | <10                                       | 132±23                                                  | >64<br>(n.d.)                   | <10                                       | 219±37                                                  | 32<br>(0.125)                   | 15 <sup>d</sup>                      | n.d./<br>n.d.                              |
| <b>67</b> | F                               | 1.49/<br>1.95          | 117                                | <10                                       | 34±16                                      | >64<br>(0.125)                  | <10                                       | 201±2                                                   | >64<br>(n.d.)                   | <10                                       | 95±3                                                    | >64/<br>(0.5)                   | 78 <sup>d</sup><br>17 <sup>e</sup>   | 0.48/<br>1.7                               |
| <b>68</b> | CN                              | 1.21/<br>1.66          | 141                                | 13±1                                      | 172±52                                     | >64<br>(2)                      | <10                                       | 490±30                                                  | >64<br>(n.d.)                   | <10                                       | 238±5                                                   | >64/<br>(16)                    | 26 <sup>d</sup>                      | 1.7/<br>5.0                                |
| <b>69</b> |                                 | 2.85/<br>2.86          | 120                                | n.d.                                      | n.d.                                       | >64<br>(2)                      | <10                                       | 145±29                                                  | >64<br>(n.d.)                   | <10                                       | 420±18                                                  | >64/<br>(>64)                   | 2 <sup>d</sup>                       | <0.1/<br>0.32                              |
| <b>70</b> |                                 | 3.45/<br>4.03          | 137                                | n.d.                                      | n.d.                                       | >64<br>(2)                      | 21                                        | n.d.                                                    | >64<br>(n.d.)                   | <10                                       | n.d.                                                    | >64/<br>(>64)                   | <1 <sup>d</sup><br>e                 | <0.1 <sup>h</sup> /<br><0.1 <sup>h</sup>   |
| <b>71</b> |                                 | 1.12/<br>2.21          | 125                                | <10                                       | n.d.                                       | >64<br>(4)                      | <10                                       | 146±16                                                  | >64<br>(n.d.)                   | <10                                       | 271±35                                                  | >64/<br>(>64)                   | 59 <sup>d</sup><br>2760 <sup>e</sup> | 0.11/<br>0.2                               |
| <b>72</b> |                                 | 1.19/<br>4.07          | 142                                | n.d.                                      | n.d.                                       | 16<br>(<0.125)                  | <10                                       | 33±9                                                    | >64<br>(n.d.)                   | <10                                       | 217±31                                                  | 64/<br>(1)                      | 22 <sup>d</sup>                      | <0.1/<br><0.1                              |
| <b>73</b> |                                 | 1.41/<br>4.76          | 134                                | <10                                       | n.d.                                       | 32/<br>0.125                    | <10                                       | 51±1                                                    | >64/<br>(n.d.)                  | <10                                       | 200±6                                                   | >64/<br>(4)                     | 40 <sup>d</sup><br>7 <sup>e</sup>    | 0.16/<br>0.17                              |

<sup>a</sup>*E. coli* ATCC5922 (wild type), CH3130 (efflux-defective; ΔtolC mutant isogenic to ATCC25922); <sup>b</sup>*A. baumannii* ATCC19606 (wild type), BM4652 (efflux-defective derivative of BM4454); <sup>c</sup>*P. aeruginosa* PAO1 (wild type), PAO750 (efflux-defective isogenic to PAO1); <sup>d</sup>kinetic solubility; <sup>e</sup>thermodynamic solubility; <sup>f</sup>gel-based assay; <sup>g</sup>The results should be interpreted carefully due to low recovery; TPSA = total polar surface area; Calc. = calculated; n.d. = not determined; WT = wild type; Δeff. = efflux-defective strain.

Table S10. Antibacterial Activity of Compounds 1–73 Against *S. aureus* and *K. pneumoniae*

| Cpd. | LogD/<br>LogP  | TPSA<br>[Å <sup>2</sup> ] | <i>S. aureus</i> <sup>a</sup> | <i>K. pneumoniae</i> <sup>b</sup> | Solubility<br>[μM]                  | Free fraction<br>[%]<br>human/<br>mouse |
|------|----------------|---------------------------|-------------------------------|-----------------------------------|-------------------------------------|-----------------------------------------|
|      |                |                           | MIC[μg/mL]                    | MIC[μg/mL]                        |                                     |                                         |
| 1    | 2.17/<br>5.52  | 104                       | <0.125                        | 2                                 | <1 <sup>d</sup><br>6.6 <sup>e</sup> | <0.1/<br><0.1                           |
| 2    | 1.14/<br>3.27  | 117                       | 2                             | >64                               | 44 <sup>d</sup>                     | 0.65/<br>0.03                           |
| 3    | 1.06/<br>3.33  | 117                       | 4                             | >64                               | <1 <sup>d</sup>                     | 0.01/<br>0.03                           |
| 4    | 0.25/<br>3.64  | 130                       | >64                           | >64                               | 277                                 | 0.01/<br>0.05/                          |
| 5    | 0.13/<br>0.36  | 108                       | >64                           | >64                               | 53 <sup>d</sup>                     | 0.2/<br>10.8                            |
| 6    | 0.13/<br>0.36  | 108                       | >64                           | >64                               | 21 <sup>d</sup>                     | 0.1/<br>0.2                             |
| 8    | 1.01/<br>4.36  | 138                       | >64                           | >64                               | <1 <sup>d</sup>                     | <0.1/<br>0.27                           |
| 9    | 2.32/<br>5.66  | 104                       | 0.5                           | 32                                | <1 <sup>d</sup><br>8.8 <sup>e</sup> | <0.1/<br>0.59                           |
| 10   | 0.40/<br>3.75  | 114                       | 2                             | >64                               | 204 <sup>d</sup>                    | <0.1/<br>0.4                            |
| 11   | 1.49/<br>1.50  | 108                       | 16                            | >64                               | 16 <sup>d</sup>                     | n.d./<br>n.d.                           |
| 12   | 1.40/<br>4.75  | 104                       | 16                            | 32                                | 36                                  | <0.1/<br>1.18                           |
| 13   | -/<br>4.30     | 117.8                     | 0.5                           | >64                               | n.d.                                | n.d.                                    |
| 14   | 5.24/<br>5.55  | 117.7                     | 8                             | >64                               | n.d.                                | n.d.                                    |
| 15   | 4.42/<br>4.42  | 122.1                     | 16                            | >64                               | n.d.                                | <0.1/<br><0.1                           |
| 16   | 2.03/<br>2.10  | 130.3                     | 1                             | >64                               | <1                                  | <0.1/<br><0.1                           |
| 17   | 3.96/<br>4.71  | 119.3                     | >64                           | >64                               | n.d.                                | n.d.                                    |
| 18   | 2.04/<br>5.39  | 95.5                      | <0.125                        | 16                                | 4 <sup>d</sup>                      | <0.1/<br><0.1                           |
| 19   | 1.89/<br>1.97  | 121.5                     | >64                           | >64                               | <1 <sup>d</sup>                     | n.d./<br>n.d.                           |
| 20   | -0.05/<br>3.52 | 106.5                     | 0.5                           | 32                                | 27 <sup>d</sup>                     | 1.04/<br>4.44 <sup>f</sup>              |
| 21   | 0.43/<br>3.77  | 95.5                      | 8                             | >64                               | 33 <sup>d</sup>                     | 0.9/<br>11.0 <sup>f</sup>               |
| 22   | 2.09/<br>5.20  | 85.8                      | 0.125                         | >64                               | n.d.                                | n.d./<br>n.d.                           |
| 23   | 1.05/<br>4.38  | 120.4                     | 8                             | >64                               | <1 <sup>d</sup>                     | 0.02/<br>0.37                           |
| 24   | 0.55/<br>3.89  | 137.5                     | 4                             | 64                                | 41 <sup>d</sup>                     | 0.07/<br>0.07                           |

Table S10. Antibacterial Activity of Compounds 1–73 Against *S. aureus* and *K. pneumoniae* (Continued)

| Cpd. | LogD/<br>LogP | TPSA<br>[Å <sup>2</sup> ] | <i>S. aureus</i> <sup>a</sup> | <i>K. pneumoniae</i> <sup>b</sup> | Solu-<br>bility<br>[μM]             | Free<br>fraction<br>[%]<br>human/<br>mouse |
|------|---------------|---------------------------|-------------------------------|-----------------------------------|-------------------------------------|--------------------------------------------|
|      | Calc.         | Calc.                     | MIC[μg/mL]                    | MIC[μg/mL]                        |                                     |                                            |
| 25   | 1.71/<br>5.05 | 103.3                     | 8                             | >64                               | <1 <sup>d</sup>                     | 0.01/<br>0.01                              |
| 26   | 0.48/<br>3.82 | 86.3                      | <0.125                        | 16                                | n.d.                                | 0.34/<br>1.43                              |
| 27   | 2.59/<br>5.94 | 104.3                     | 0.125                         | 4                                 | >80 <sup>d</sup><br>92 <sup>e</sup> | 0.016/<br>0.01                             |
| 28   | 3.19/<br>6.54 | 104.3                     | 0.5                           | 32                                | n.d.                                | <0.1/<br><0.1                              |
| 29   | 2.27/<br>5.62 | 104.3                     | <0.125                        | 8                                 | n.d.                                | n.d./<br>n.d.                              |
| 30   | 1.54/<br>4.89 | 124.5                     | 4                             | 64                                | 22 <sup>d</sup><br>14 <sup>e</sup>  | <0.1/<br>0.1                               |
| 31   | 2.19/<br>5.53 | 113.5                     | <0.125                        | 2                                 | <1 <sup>d</sup><br>12 <sup>e</sup>  | <0.1/<br>0.1                               |
| 32   | 0.91/<br>4.26 | 138.5                     | 2                             | >64                               | 16 <sup>d</sup>                     | 0.05/<br>4.32                              |
| 33   | 2.51/<br>2.52 | 130.3                     | 0.5                           | >64                               | 2<br>90 <sup>d</sup>                | 0.28/<br>0.53                              |
| 34   | 2.84/<br>2.87 | 107.5                     | <0.125                        | 8                                 | 16 <sup>d</sup>                     | n.d./<br>n.d.                              |
| 35   | 3.71/<br>3.72 | 107.6                     | 0.25                          | 8                                 | 14 <sup>d</sup>                     | n.d./<br>n.d.                              |
| 36   | 2.26/<br>2.74 | 116.8                     | 0.125                         | 8                                 | 35 <sup>d</sup><br>3 <sup>e</sup>   | <0.1/<br>0.3                               |
| 37   | 2.84/<br>2.87 | 107.5                     | 4                             | 64                                | 10 <sup>d</sup>                     | n.d./<br>n.d.                              |
| 38   | 1.25/<br>4.60 | 133.4                     | 2                             | >64                               | <1 <sup>d</sup>                     | 0.06/<br>0.23 <sup>g</sup>                 |
| 39   | 2.93/<br>6.28 | 142.6                     | 2                             | 4                                 | 14 <sup>d</sup>                     | 1.61/<br><0.01                             |
| 40   | 1.78/<br>4.99 | 135.0                     | 4                             | >64                               | 19 <sup>d</sup>                     | n.d./<br>n.d.                              |
| 41   | 2.21/<br>2.49 | 133.6                     | 2                             | >64                               | 4 <sup>d</sup>                      | n.d./<br>n.d.                              |
| 42   | 2.80/<br>2.86 | 110.8                     | 16                            | >64                               | 4 <sup>d</sup>                      | <0.1/<br>0.3                               |
| 43   | 3.55/<br>3.57 | 145.9                     | 4                             | >64                               | 4 <sup>d</sup>                      | n.d./<br>n.d.                              |
| 44   | 2.63/<br>2.72 | 110.8                     | 2                             | >64                               | 12 <sup>d</sup>                     | n.d./<br>n.d.                              |
| 45   | 2.05/<br>1.44 | 107.6                     | 64                            | >64                               | 23 <sup>d</sup>                     | 0.3/<br>1.9                                |
| 46   | 1.22/<br>4.57 | 104                       | n.d.                          | n.d.                              | 35 <sup>d</sup>                     | <0.1/<br><0.1                              |
| 47   | 2.11/<br>5.46 | 104                       | <0.125                        | 1                                 | 29 <sup>d</sup>                     | <0.1/<br><0.1                              |
| 48   | 1.65/<br>4.99 | 104                       | <0.125                        | 4                                 | 35 <sup>d</sup>                     | <0.1/<br><0.1                              |
| 49   | 0.35/<br>3.70 | 114                       | 4                             | >64                               | 35 <sup>d</sup>                     | 0.03/<br>0.12                              |

Table S10. Antibacterial Activity of Compounds 1–73 Against *S. aureus* and *K. pneumoniae* (Continued)

| Cpd. | LogD/<br>LogP  | TPSA<br>[Å <sup>2</sup> ] | <i>S. aureus</i> <sup>a</sup> | <i>K. pneumoniae</i> <sup>b</sup> | Solu-<br>bility<br>[μM]              | Free<br>fraction<br>[%]<br>human/<br>mouse |
|------|----------------|---------------------------|-------------------------------|-----------------------------------|--------------------------------------|--------------------------------------------|
|      | Calc.          | Calc.                     | MIC[μg/mL]                    | MIC[μg/mL]                        |                                      |                                            |
| 50   | 1.99/<br>5.33  | 104                       | 4                             | 64                                | 23 <sup>d</sup><br>19 <sup>e</sup>   | <0.1/<br><0.1                              |
| 51   | 1.52/<br>4.87  | 104                       | 0.25                          | 4                                 | 41 <sup>d</sup><br>18 <sup>e</sup>   | 0.13/<br>0.3                               |
| 52   | 1.52/<br>4.87  | 104                       | 8                             | >64                               | <1 <sup>d</sup><br>7 <sup>e</sup>    | 0.17/<br>0.7                               |
| 53   | 1.52/<br>4.87  | 104                       | 0.5                           | >64                               | 52 <sup>d</sup><br>20 <sup>e</sup>   | 0.19/<br>0.7                               |
| 54   | 1.24/<br>4.59  | 128                       | 64                            | >64                               | 57 <sup>d</sup>                      | 0.4/<br>1.2                                |
| 55   | 1.38/<br>4.73  | 104                       | 4                             | >64                               | 3 <sup>d</sup>                       | n.d./<br>n.d.                              |
| 56   | 0.91/<br>1.37  | 116.8                     | 32                            | >64                               | 62 <sup>d</sup>                      | 0.3/<br>1.5                                |
| 57   | 1.29/<br>2.46  | 116.8                     | 0.5                           | >64                               | 35 <sup>d</sup>                      | 0.13/<br>0.1                               |
| 58   | 1.44/<br>1.74  | 116.8                     | 4                             | 64                                | 57 <sup>d</sup>                      | 0.3/<br>1.3                                |
| 59   | 1.66/<br>2.14  | 116.8                     | <0.125                        | 8                                 | 20 <sup>d</sup><br>70 <sup>e</sup>   | <0.1/<br>0.5                               |
| 60   | 1.20/<br>1.68  | 116.8                     | 64                            | >64                               | 67 <sup>d</sup><br>7 <sup>e</sup>    | 1.5/<br>4.4                                |
| 61   | 0.16/<br>3.51  | 104.3                     | >64                           | >64                               | 3 <sup>d</sup>                       | n.d./<br>n.d.                              |
| 62   | -0.13/<br>3.22 | 128.1                     | >64                           | >64                               | 7 <sup>d</sup>                       | n.d./<br>n.d.                              |
| 63   | -0.45/<br>2.48 | 117.2                     | >64                           | >64                               | 42 <sup>d</sup>                      | 0.7/<br>19.9                               |
| 64   | 1.43/<br>4.78  | 138                       | 2                             | >64                               | 7 <sup>d</sup>                       | 0.01/<br>3.25                              |
| 65   | 2.56/<br>3.01  | 117                       | 0.125                         | 8                                 | 30 <sup>d</sup><br>25 <sup>e</sup>   | <0.1/<br><0.1                              |
| 66   | 1.95/<br>2.41  | 117                       | 16                            | 64                                | 15 <sup>d</sup>                      | n.d./<br>n.d.                              |
| 67   | 1.49/<br>1.95  | 117                       | 64                            | >64                               | 78 <sup>d</sup><br>17 <sup>e</sup>   | 0.48/<br>1.7                               |
| 68   | 1.21/<br>1.66  | 141                       | 64                            | >64                               | 26 <sup>d</sup>                      | 1.7/<br>5.0                                |
| 69   | 2.85/<br>2.86  | 120                       | >64                           | >64                               | 2 <sup>d</sup>                       | <0.1/<br>0.32                              |
| 70   | 3.45/<br>4.03  | 137                       | 0.5                           | >64                               | <1 <sup>d</sup>                      | <0.1/<br><0.1                              |
| 71   | 1.12/<br>2.21  | 125                       | >64                           | >64                               | 59 <sup>d</sup><br>2760 <sup>e</sup> | 0.11/<br>0.2                               |
| 72   | 1.19/<br>4.07  | 142                       | 1                             | 64                                | 22 <sup>d</sup>                      | <0.1/<br><0.1                              |
| 73   | 1.41/<br>4.76  | 134                       | 8                             | 64                                | 40 <sup>d</sup><br>7 <sup>e</sup>    | 0.16/<br>0.17                              |

<sup>a</sup> *S. aureus* ATCC29213 (wild type); <sup>b</sup> *K. pneumoniae* ATCC13883 (wild type); <sup>d</sup> kinetic solubility; <sup>e</sup> thermodynamic solubility; <sup>§</sup> The results should be interpreted carefully due to low recovery; TPSA = total polar surface area; Calc. = calculated; n.d. = not determined; WT = wild type; Δeff. = efflux-defective strain.

Table S11. Plasma Protein Binding of Selected Optimized Derivatives of Compounds 1 and 27.

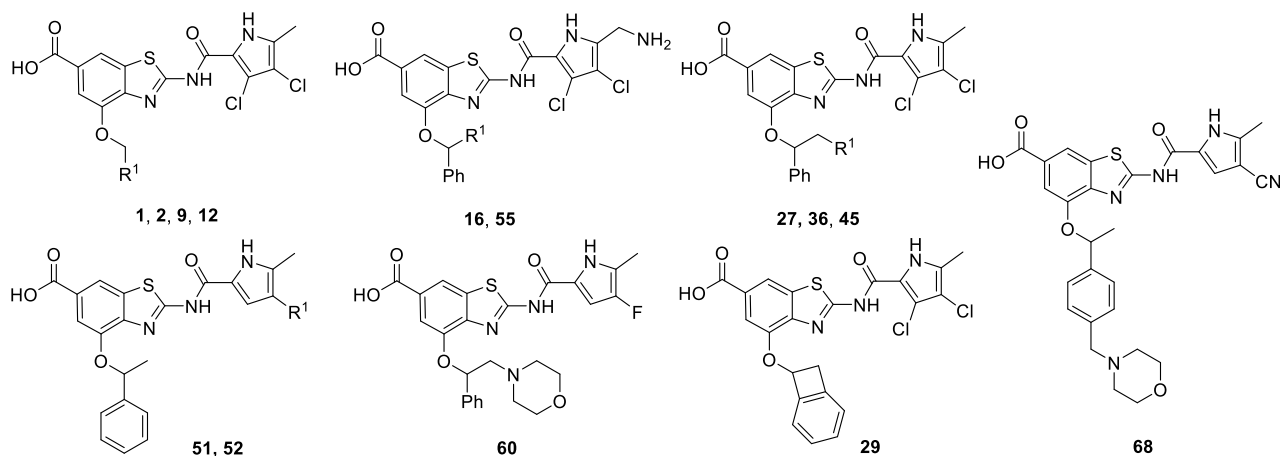

| Cpd. | R <sup>1</sup>  | LogD/<br>LogP | TPSA[Å <sup>2</sup> ]<br>Calc. | <i>E. coli</i> <sup>a</sup>               |                                            |                | <i>A. baumannii</i> <sup>b</sup>          |                                                         |                    | <i>P. aeruginosa</i> <sup>c</sup>         |                                                         |                | Solu-<br>bility                     | Free fraction |                   |
|------|-----------------|---------------|--------------------------------|-------------------------------------------|--------------------------------------------|----------------|-------------------------------------------|---------------------------------------------------------|--------------------|-------------------------------------------|---------------------------------------------------------|----------------|-------------------------------------|---------------|-------------------|
|      |                 |               |                                | <i>Gyrase</i><br>IC <sub>50</sub><br>[nM] | <i>Topo IV</i><br>IC <sub>50</sub><br>[nM] | MIC[μg/<br>mL] | <i>Gyrase</i><br>IC <sub>50</sub><br>[nM] | <i>Topo IV</i><br>IC <sub>50</sub><br>[nM] <sup>f</sup> | MIC<br>[μg/<br>mL] | <i>Gyrase</i><br>IC <sub>50</sub><br>[nM] | <i>Topo IV</i><br>IC <sub>50</sub><br>[nM] <sup>f</sup> | MIC<br>[μg/mL] |                                     | Human<br>[%]  | Mouse<br>[%]      |
| 1    | Ph              | 2.17/<br>5.82 | 104.3                          | <10                                       | 350                                        | 4              | <10                                       | 64                                                      | 0.5                | <10                                       | 235                                                     | 8              | <1 <sup>d</sup><br>6.6 <sup>e</sup> | <0.1          | <0.1              |
| 2    |                 | 1.14/<br>3.27 | 117.2                          | <10                                       | n.d.                                       | >64            | <10                                       | n.d.                                                    | >64                | <10                                       | n.d.                                                    | >64            | 44 <sup>d</sup>                     | 0.65          | 0.03              |
| 9    |                 | 2.32/<br>5.66 | 104.3                          | <10                                       | 54±28                                      | >64            | <10                                       | n.d.                                                    | 4                  | <10                                       | n.d.                                                    | >64            | <1 <sup>d</sup><br>8.8 <sup>e</sup> | <0.1          | 0.59              |
| 12   | CF <sub>3</sub> | 1.40/<br>4.75 | 104.3                          | <10                                       | n.d.                                       | 32             | <10                                       | 155±5                                                   | 8                  | <10                                       | 255±35                                                  | 64             | 36                                  | <0.1          | 1.18              |
| 16   | H               | 2.03/<br>2.10 | 130.3                          | <10                                       | not<br>active                              | >64            | 490                                       | 3020±640                                                | 32                 | 1140                                      | 5160±585                                                | 64             | <1 <sup>d</sup>                     | 0.59          | <0.1 <sup>g</sup> |
| 29   | -               | 0.15/<br>3.63 | 133.21                         | <10                                       | n.d.                                       | >64            | <10                                       | n.d.                                                    | >64                | <10                                       | n.d.                                                    | >64            | <1 <sup>d</sup>                     | 0.53          | 3.83              |
| 27   | H               | 2.59/<br>5.94 | 104.3                          | <10                                       | 318±94                                     | 1              | 16±2                                      | 6.7±0.5                                                 | 0.5                | <10                                       | 29±1                                                    | 1              | 36 <sup>d</sup><br>92 <sup>e</sup>  | 0.016         | 0.01              |
| 36   |                 | 2.26/<br>2.74 | 116.8                          | <10                                       | -                                          | 2              | <10                                       | 11±2                                                    | 2                  | <10                                       | 28±1                                                    | 8              | 35 <sup>d</sup><br>3 <sup>e</sup>   | <0.1          | 0.3 <sup>g</sup>  |
| 45   |                 | 2.05/<br>1.44 | 107.6                          | n.d.                                      | n.d.                                       | >64            | n.d.                                      | n.d.                                                    | 64                 | n.d.                                      | n.d.                                                    | >64            | 23 <sup>d</sup>                     | 0.3           | 1.9               |
| 51   | F               | 1.52/<br>4.87 | 104.3                          | <10                                       | 37±9                                       | 4              | <10                                       | 7.8±1.1                                                 | 2                  | <10                                       | 9.3±1.1                                                 | 4              | 41 <sup>d</sup><br>18 <sup>e</sup>  | 0.13          | 0.3               |
| 52   | CN              | 1.24/<br>4.59 | 128.1                          | <10                                       | 126±22                                     | >64            | <10                                       | 167±15                                                  | >64                | <10                                       | 29±2                                                    | >64            | 57 <sup>d</sup>                     | 0.4           | 1.2               |
| 55   | Me              | 2.44/<br>2.52 | 130.3                          | 41±12                                     | 18500<br>±2080                             | >64            | n.d.                                      | n.d.                                                    | n.d.               | n.d.                                      | n.d.                                                    | >64            | 2 <sup>d</sup>                      | 1.28          | 0.3               |
| 60   | F               | 1.20/<br>1.68 | 116.8                          | <10                                       | 39±14                                      | 64             | <10                                       | 27±2                                                    | >64                | <10                                       | 22±1                                                    | 64             | 67 <sup>d</sup><br>7 <sup>e</sup>   | 1.5           | 4.4               |
| 68   | CN              | 1.21/<br>1.66 | 140.6                          | <10                                       | 172±29                                     | >64            | <10                                       | 490±30                                                  | >64                | <10                                       | 238±5                                                   | >64            | 26 <sup>d</sup>                     | 1.7           | 5.0               |

<sup>a</sup>*E. coli* ATTN25922; <sup>b</sup>*A. baumannii* ATTN19606; <sup>c</sup>*P. aeruginosa* PA01; <sup>d</sup>kinetic solubility; <sup>e</sup>thermodynamic solubility; <sup>f</sup>gel-based assay; <sup>g</sup>The results should be interpreted carefully due to low recovery; n.d. = not determined.

Table S12. X-ray Data Collection and Refinement Statistics for Inhibitor Complexes of *E. coli* GyrB24

| Inhibitor                                                         | Compound 1                                    | Compound 7                                    |
|-------------------------------------------------------------------|-----------------------------------------------|-----------------------------------------------|
| Data collection                                                   |                                               |                                               |
| Beamline                                                          | I03 DLS, UK                                   | I03 DLS, UK                                   |
| Wavelength (Å)                                                    | 0.9763                                        | 0.9762                                        |
| Detector                                                          | Pilatus3 6M                                   | Eiger2 XE 16M                                 |
| Resolution range (Å)                                              | 51.50 – 1.16 (1.18 – 1.16)                    | 52.62 – 1.65 (1.68 – 1.65)                    |
| Space Group                                                       | C2                                            | P2 <sub>1</sub> 2 <sub>1</sub> 2 <sub>1</sub> |
| Cell parameters (Å/°)                                             | $a = 76.7, b = 50.3, c = 52.7, \beta = 102.3$ | $a = 49.8, b = 52.6, c = 81.5$                |
| Total no. of measured intensities                                 | 433042 (17809)                                | 339970 (17285)                                |
| Unique reflections                                                | 65952 (3124)                                  | 26432 (1263)                                  |
| Multiplicity                                                      | 6.6 (5.7)                                     | 12.9 (13.7)                                   |
| Mean $I/\sigma(I)$                                                | 12.5 (1.1)                                    | 9.4 (1.2)                                     |
| Completeness (%)                                                  | 97.2 (93.0)                                   | 99.8 (99.8)                                   |
| $R_{\text{merge}}^a$                                              | 0.064 (1.387)                                 | 0.196 (2.294)                                 |
| $R_{\text{meas}}^b$                                               | 0.070 (1.528)                                 | 0.205 (2.382)                                 |
| $CC_{1/2}^c$                                                      | 0.999 (0.465)                                 | 0.997 (0.581)                                 |
| Wilson $B$ value (Å <sup>2</sup> )                                | 11.3                                          | 18.3                                          |
| Refinement                                                        |                                               |                                               |
| Resolution range (Å)                                              | 41.81 – 1.16 (1.19 – 1.16)                    | 44.24 – 1.65 (1.69 – 1.65)                    |
| Reflections: working/free <sup>d</sup>                            | 62697/3244                                    | 25156/1221                                    |
| $R_{\text{work}}/R_{\text{free}}^e$                               | 0.134/0.161 (0.272/0.269)                     | 0.188/0.221 (0.316/0.341)                     |
| Ramachandran plot: favoured/allowed/disallowed <sup>f</sup> (%)   | 96.3/3.2/0.5                                  | 96.5/2.5/1.0                                  |
| R.m.s. bond distance deviation (Å)                                | 0.011                                         | 0.010                                         |
| R.m.s. bond angle deviation (°)                                   | 1.58                                          | 1.52                                          |
| RSCC for inhibitor <sup>g</sup>                                   | 0.99                                          | 0.98                                          |
| Protein residues (ranges)                                         | 193 (8-98, 117-218)                           | 204 (14-111, 114-219)                         |
| No. of water/inhibitor/other <sup>h</sup>                         | 210/1/1                                       | 197/1/2                                       |
| Mean $B$ factors: protein/water/inhibitor/other (Å <sup>2</sup> ) | 20/36/18/29                                   | 26/36/21/37                                   |
| Accession code                                                    | 7P2M                                          | 7P2W                                          |

Values in parentheses are for the outer resolution shell.

<sup>a</sup>  $R_{\text{merge}} = \sum_{\text{hkl}} \sum_i |I_i(\text{hkl}) - \langle I(\text{hkl}) \rangle| / \sum_{\text{hkl}} \sum_i I_i(\text{hkl})$ .

<sup>b</sup>  $R_{\text{meas}} = \sum_{\text{hkl}} [N/(N-1)]^{1/2} \times \sum_i |I_i(\text{hkl}) - \langle I(\text{hkl}) \rangle| / \sum_{\text{hkl}} \sum_i I_i(\text{hkl})$ , where  $I_i(\text{hkl})$  is the  $i$ th observation of reflection  $\text{hkl}$ ,  $\langle I(\text{hkl}) \rangle$  is the weighted average intensity for all observations  $i$  of reflection  $\text{hkl}$  and  $N$  is the number of observations of reflection  $\text{hkl}$ .

<sup>c</sup>  $CC_{1/2}$  is the correlation coefficient between symmetry equivalent intensities from random halves of the dataset.

<sup>d</sup> The data set was split into "working" and "free" sets consisting of 95 and 5% of the data respectively. The free set was not used for refinement.

<sup>e</sup> The R-factors  $R_{\text{work}}$  and  $R_{\text{free}}$  are calculated as follows:  $R = \sum(|F_{\text{obs}} - F_{\text{calc}}|) / \sum |F_{\text{obs}}|$ , where  $F_{\text{obs}}$  and  $F_{\text{calc}}$  are the observed and calculated structure factor amplitudes, respectively.

<sup>f</sup> As calculated using MolProbity, *Nucleic Acids Res.* **2007**, 35, W375-383.

<sup>g</sup> Real Space Correlation Coefficients from PDB validation report indicating density fit of ligand.

<sup>h</sup> Other = buffer components

Table S13. X-ray Data Collection and Refinement Statistics for Inhibitor Complexes of *Acinetobacter baumannii* GyrB23

| Inhibitor                                                                 | Novobiocin                                   | Compound 27                                                             | Compound (S)-27                                                         |
|---------------------------------------------------------------------------|----------------------------------------------|-------------------------------------------------------------------------|-------------------------------------------------------------------------|
| Data collection                                                           |                                              |                                                                         |                                                                         |
| Beamline                                                                  | I24 DLS, UK                                  | I04 DLS, UK                                                             | I04 DLS, UK                                                             |
| Wavelength (Å)                                                            | 0.9999                                       | 0.9795                                                                  | 0.9795                                                                  |
| Detector                                                                  | Pilatus3 6M                                  | Eiger2 XE 16M                                                           | Eiger2 XE 16M                                                           |
| Resolution range (Å)                                                      | 64.13 – 1.90 (1.94 – 1.90)                   | 43.65 – 1.60 (1.63 – 1.60)                                              | 43.54 – 1.55 (1.58 – 1.55)                                              |
| Space Group                                                               | <i>P</i> 4 <sub>1</sub> 2 <sub>1</sub> 2     | <i>C</i> 2                                                              | <i>C</i> 2                                                              |
| Cell parameters (Å/°)                                                     | <i>a</i> = <i>b</i> = 42.9, <i>c</i> = 256.2 | <i>a</i> = 121.1, <i>b</i> = 48.4, <i>c</i> = 83.3,<br><i>β</i> = 124.2 | <i>a</i> = 120.6, <i>b</i> = 48.3, <i>c</i> = 82.7,<br><i>β</i> = 123.8 |
| Total no. of measured intensities                                         | 530228 (34649)                               | 345218 (11402)                                                          | 626669 (30739)                                                          |
| Unique reflections                                                        | 20179 (1269)                                 | 52822 (2479)                                                            | 57534 (2777)                                                            |
| Multiplicity                                                              | 26.3 (27.3)                                  | 6.5 (4.6)                                                               | 10.9 (11.1)                                                             |
| Mean <i>I</i> /σ( <i>I</i> )                                              | 8.8 (1.2)                                    | 13.1 (0.6)                                                              | 8.9 (0.5)                                                               |
| Completeness (%)                                                          | 100.0 (100.0)                                | 99.7 (94.3)                                                             | 99.9 (99.0)                                                             |
| <i>R</i> <sub>merge</sub> <sup>a</sup>                                    | 0.223 (2.620)                                | 0.090 (1.638)                                                           | 0.105 (1.550)                                                           |
| <i>R</i> <sub>meas</sub> <sup>b</sup>                                     | 0.228 (2.668)                                | 0.098 (1.853)                                                           | 0.110 (1.625)                                                           |
| <i>CC</i> <sub>1/2</sub> <sup>c</sup>                                     | 0.998 (0.894)                                | 0.998 (0.427)                                                           | 0.999 (0.660)                                                           |
| Wilson <i>B</i> value (Å <sup>2</sup> )                                   | 29.3                                         | 20.1                                                                    | 18.6                                                                    |
| Refinement                                                                |                                              |                                                                         |                                                                         |
| Resolution range (Å)                                                      | 64.13 – 1.90 (1.95 – 1.90)                   | 43.65 – 1.60 (1.64 – 1.60)                                              | 43.54 – 1.55 (1.58 – 1.55)                                              |
| Reflections: working/free <sup>d</sup>                                    | 19078/989                                    | 50096/2724                                                              | 54572/2969                                                              |
| <i>R</i> <sub>work</sub> / <i>R</i> <sub>free</sub> <sup>e</sup>          | 0.217/0.237 (0.320/0.357)                    | 0.161/0.219 (0.312/0.315)                                               | 0.180/0.224 (0.342/0.380)                                               |
| Ramachandran plot:<br>favoured/allowed/disallowed <sup>f</sup> (%)        | 98.5/1.5/0.0                                 | 98.3/1.7/0.0                                                            | 97.8/2.2/0.0                                                            |
| R.m.s. bond distance deviation (Å)                                        | 0.008                                        | 0.006                                                                   | 0.006                                                                   |
| R.m.s. bond angle deviation (°)                                           | 1.44                                         | 1.28                                                                    | 1.24                                                                    |
| RSCC for inhibitor(s) <sup>g</sup>                                        | A: 0.95                                      | A: 0.98, B: 0.99                                                        | A: 0.98, B: 0.98                                                        |
| Protein residues per chain (ranges)                                       | A: 198 (28-117, 126-233)                     | A: 185 (29-112, 131-231)<br>B: 185 (30-112, 130-231)                    | A: 184 (29-112, 132-231)<br>B: 185 (30-112, 130-231)                    |
| No. of molecules: water/inhibitor/other <sup>h</sup>                      | 70/1/5                                       | 321/2/0                                                                 | 354/2/1                                                                 |
| Mean <i>B</i> factors:<br>protein/water/inhibitor/other (Å <sup>2</sup> ) | 38/43/30/51                                  | 30/40/31/-                                                              | 34/45/35/31                                                             |
| Accession code                                                            | 7PQI                                         | 7PQL                                                                    | 7PQM                                                                    |

Values in parentheses are for the outer resolution shell.

<sup>a</sup>  $R_{\text{merge}} = \sum_{\text{hkl}} \sum_i |I_i(\text{hkl}) - \langle I(\text{hkl}) \rangle| / \sum_{\text{hkl}} \sum_i I_i(\text{hkl})$ .

<sup>b</sup>  $R_{\text{meas}} = \sum_{\text{hkl}} [N/(N-1)]^{1/2} \times \sum_i |I_i(\text{hkl}) - \langle I(\text{hkl}) \rangle| / \sum_{\text{hkl}} \sum_i I_i(\text{hkl})$ , where  $I_i(\text{hkl})$  is the *i*th observation of reflection *hkl*,  $\langle I(\text{hkl}) \rangle$  is the weighted average intensity for all observations *i* of reflection *hkl* and *N* is the number of observations of reflection *hkl*.

<sup>c</sup> *CC*<sub>1/2</sub> is the correlation coefficient between symmetry equivalent intensities from random halves of the dataset.

<sup>d</sup> The data set was split into "working" and "free" sets consisting of 95 and 5% of the data respectively. The free set was not used for refinement.

<sup>e</sup> The R-factors *R*<sub>work</sub> and *R*<sub>free</sub> are calculated as follows:  $R = \sum(|F_{\text{obs}} - F_{\text{calc}}|) / \sum |F_{\text{obs}}|$ , where *F*<sub>obs</sub> and *F*<sub>calc</sub> are the observed and calculated structure factor amplitudes, respectively.

<sup>f</sup> As calculated using MolProbity, *Nucleic Acids Res.* **2007**, *35*, W375-383.

<sup>g</sup> Real Space Correlation Coefficients from PDB validation report indicating density fit of ligand.

<sup>h</sup> Other = buffer components



Table S14. X-ray Data Collection and Refinement Statistics for Inhibitor Complexes of *Pseudomonas aeruginosa* GyrB24

| Inhibitor                                                              | Novobiocin                                                         | Compound (S)-27                                                   |
|------------------------------------------------------------------------|--------------------------------------------------------------------|-------------------------------------------------------------------|
| Data collection                                                        |                                                                    |                                                                   |
| Beamline                                                               | I04-1                                                              | I03                                                               |
| Wavelength (Å)                                                         | 0.9126                                                             | 0.9796                                                            |
| Detector                                                               | Pilatus 6M-F                                                       | Eiger2 XE 16M                                                     |
| Resolution range (Å)                                                   | 109.11 – 1.32 (1.34 – 1.32)                                        | 41.89 – 2.20 (2.27 – 2.20)                                        |
| Space Group                                                            | <i>P</i> 2 <sub>1</sub>                                            | <i>P</i> 2 <sub>1</sub>                                           |
| Cell parameters (Å/°)                                                  | <i>a</i> = 62.7, <i>b</i> = 47.4, <i>c</i> = 110.6, $\beta$ = 99.5 | <i>a</i> = 52.6, <i>b</i> = 47.9, <i>c</i> = 75.3, $\beta$ = 93.5 |
| Total no. of measured intensities                                      | 977797 (39772)                                                     | 130013 (10689)                                                    |
| Unique reflections                                                     | 150584 (7368)                                                      | 19239 (1638)                                                      |
| Multiplicity                                                           | 6.5 (5.4)                                                          | 6.8 (6.5)                                                         |
| Mean <i>I</i> / $\sigma$ ( <i>I</i> )                                  | 9.9 (1.0)                                                          | 5.9 (1.5)                                                         |
| Completeness (%)                                                       | 100.0 (99.8)                                                       | 100.0 (100.0)                                                     |
| <i>R</i> <sub>merge</sub> <sup>a</sup>                                 | 0.071 (1.249)                                                      | 0.219 (1.193)                                                     |
| <i>R</i> <sub>meas</sub> <sup>b</sup>                                  | 0.078 (1.386)                                                      | 0.237 (1.296)                                                     |
| <i>CC</i> <sub>1/2</sub> <sup>c</sup>                                  | 0.999 (0.474)                                                      | 0.991 (0.646)                                                     |
| Wilson <i>B</i> value (Å <sup>2</sup> )                                | 15.1                                                               | 25.9                                                              |
| Refinement                                                             |                                                                    |                                                                   |
| Resolution range (Å)                                                   | 109.11 – 1.32 (1.35 – 1.32)                                        | 41.89 – 2.20 (2.27 – 2.20)                                        |
| Reflections: working/free <sup>d</sup>                                 | 143035/7512                                                        | 18270/953                                                         |
| <i>R</i> <sub>work</sub> / <i>R</i> <sub>free</sub> <sup>e</sup>       | 0.148/0.177 (0.289/0.302)                                          | 0.194/0.236 (0.278/0.355)                                         |
| Ramachandran plot: favoured/allowed/disallowed <sup>f</sup> (%)        | 98.7/1.3/0.0                                                       | 98.0/2.0/0.0                                                      |
| R.m.s. bond distance deviation (Å)                                     | 0.008                                                              | 0.010                                                             |
| R.m.s. bond angle deviation (°)                                        | 1.31                                                               | 1.52                                                              |
| RSCC for inhibitor(s) <sup>g</sup>                                     | A: 0.98, B: 0.97, C: 0.95                                          | A: 0.98, B: 0.97                                                  |
| Protein residues per chain (ranges)                                    | A: 212 (10-221), B 212 (9-220), C: 205 (17-221)                    | A: 183 (17-100, 121-219), B: 183 (19-101, 121-220)                |
| No. of molecules: water/inhibitor/other <sup>h</sup>                   | 642/3/3                                                            | 92/2/0                                                            |
| Mean <i>B</i> factors: protein/water/inhibitor/other (Å <sup>2</sup> ) | 22/34/18/26                                                        | 16/31/17/-                                                        |
| Accession code                                                         | 7PTF                                                               | 7PTG                                                              |

Values in parentheses are for the outer resolution shell.

$$^a R_{\text{merge}} = \frac{\sum hkl \sum i |I_i(hkl) - \langle I(hkl) \rangle|}{\sum hkl \sum i I_i(hkl)}$$

<sup>b</sup>  $R_{\text{meas}} = \frac{\sum hkl [N/(N-1)]^{1/2} \times \sum i |I_i(hkl) - \langle I(hkl) \rangle|}{\sum hkl \sum i I_i(hkl)}$ , where  $I_i(hkl)$  is the *i*th observation of reflection *hkl*,  $\langle I(hkl) \rangle$  is the weighted average intensity for all observations *i* of reflection *hkl* and *N* is the number of observations of reflection *hkl*.

<sup>c</sup> *CC*<sub>1/2</sub> is the correlation coefficient between symmetry equivalent intensities from random halves of the dataset.

<sup>d</sup> The data set was split into "working" and "free" sets consisting of 95 and 5% of the data respectively. The free set was not used for refinement.

<sup>e</sup> The R-factors *R*<sub>work</sub> and *R*<sub>free</sub> are calculated as follows:  $R = \frac{\sum (|F_{\text{obs}} - F_{\text{calc}}|)}{\sum |F_{\text{obs}}|}$ , where *F*<sub>obs</sub> and *F*<sub>calc</sub> are the observed and calculated structure factor amplitudes, respectively.

<sup>f</sup> As calculated using MolProbity, *Nucleic Acids Res.* **2007**, *35*, W375-383.

<sup>g</sup> Real Space Correlation Coefficients from PDB validation report indicating density fit of ligand.

<sup>h</sup> Other = buffer components

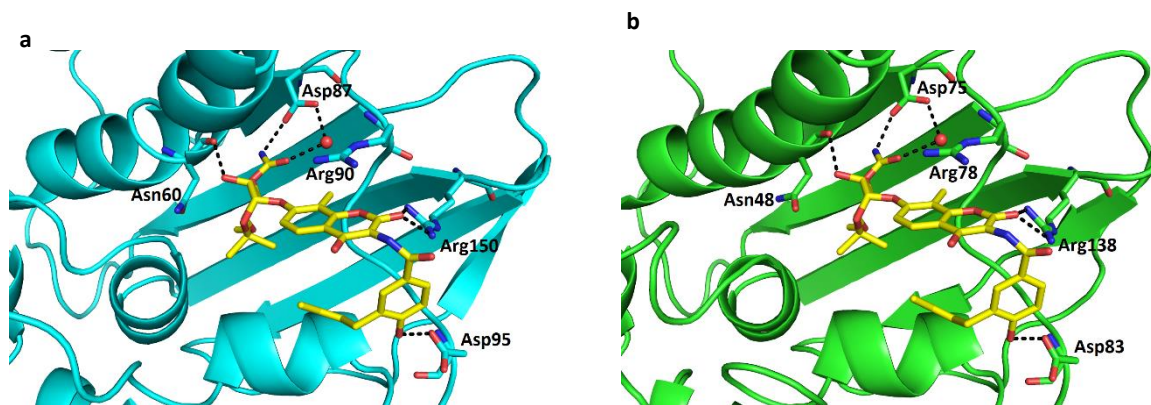

Figure S1. Co-crystal structures of novobiocin in complex with *A. baumannii* GyrB23 and *P. aeruginosa* GyrB24. (a) *A. baumannii* GyrB23 (in cyan cartoon, PDB 7PQI) and (b) *P. aeruginosa* GyrB24 (in green cartoon, PDB 7PTF). Novobiocin is represented in yellow sticks. For clarity, only amino acid residues that interact with novobiocin are shown as sticks. Water molecules are presented as red spheres and hydrogen bonds are shown as dashed black lines.

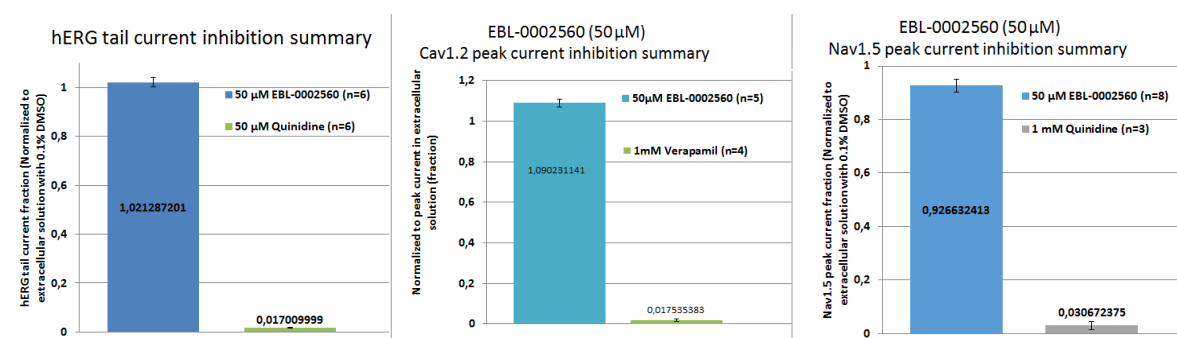

Figure S2. hERG, Cav1.2 and Nav1.5 ion channel inhibition assay for Compound 1 (EBL-2560).

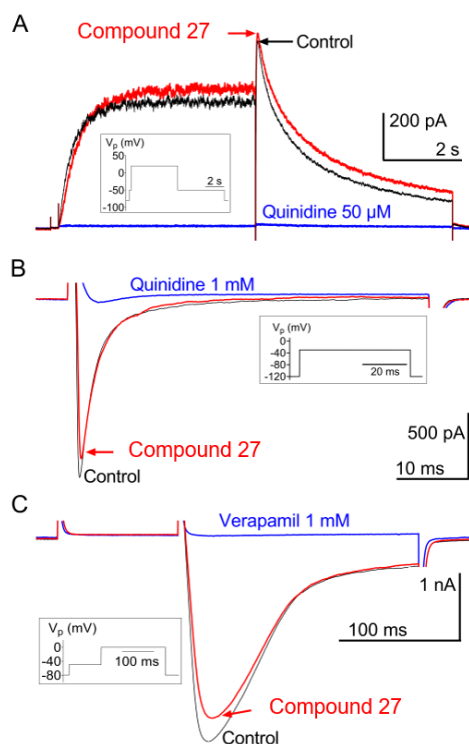

Figure S3. hERG (A), Nav1.5 (B) and Cav1.2 (C) ion channel inhibition assay for Compound 27.

Representative recordings of the hERG tail current (A), Nav1.5 (B) and Cav1.2 (C) currents when the Compound 27 was applied (red). Control recordings are shown in black. Inhibition by specific channel blockers served as positive controls (blue). The stimulation protocol, shown as inset in each panel, evoked the respective currents. V<sub>p</sub>, pipette potential.

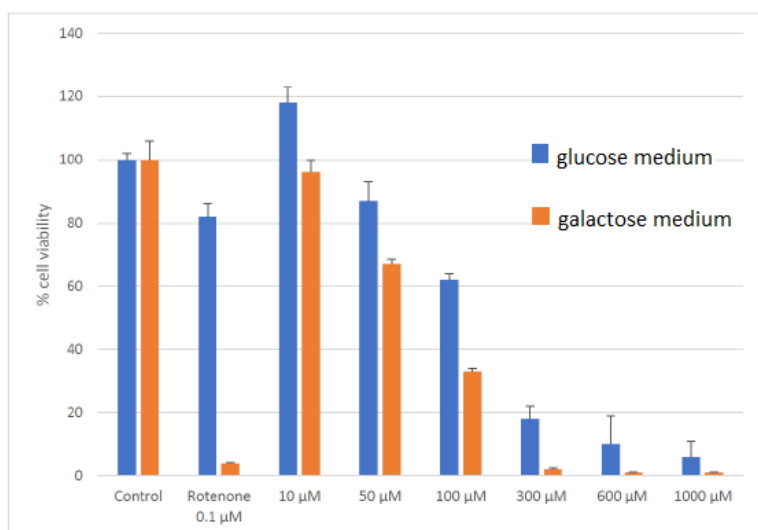

Figure S4. Mitochondrial toxicity assay of Compound 1 in HepG2 cells.

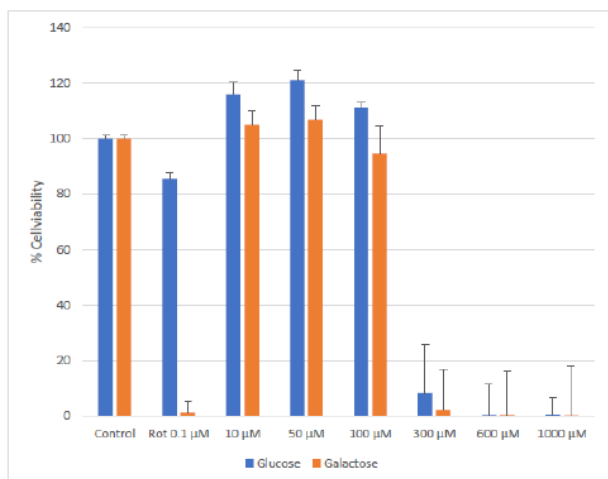

Figure S5. Mitochondrial toxicity assay of Compound 27 in HepG2 cells.

A3070 (EBL-2560)

| Sample | Concentration | No. binucleate cells | % Cytostasis ( $\pm$ STD) | % MN ( $\pm$ STD) |
|--------|---------------|----------------------|---------------------------|-------------------|
| CTR    |               | 2094                 | -                         | 2.8 $\pm$ 1.5     |
| A3070  | 50 $\mu$ M    | -                    | 55.0 $\pm$ 4.3 (TOX)      | 1.6 $\pm$ 2.6     |
| A3070  | 25 $\mu$ M    | 1649                 | 16.6 $\pm$ 7.9            | 2.4 $\pm$ 2.1     |
| A3070  | 12 $\mu$ M    | 1889                 | 9.3 $\pm$ 11.0            | 2.8 $\pm$ 1.9     |
| A3070  | 6 $\mu$ M     | 2021                 | -                         | 2.4 $\pm$ 1.7     |
| A3070  | 3 $\mu$ M     | 2054                 | -                         | 2.1 $\pm$ 0.7     |

Figure S6. Micronucleus test (MNT) results for Compound 1 (EBL2560).

TOX indicates high toxicity in the culture observed de visu by microscopy.

| Sample | Concentration | No. binucleate cells | % Cytostasis ( $\pm$ STD) | % MN ( $\pm$ STD) |
|--------|---------------|----------------------|---------------------------|-------------------|
| CTR    |               | 2094                 | -                         | 2.8 $\pm$ 1.5     |
| A3069  | 150 $\mu$ M   | -                    | TOX                       |                   |
| A3069  | 75 $\mu$ M    | -                    | 59 $\pm$ 13 (TOX)         | 1.1 $\pm$ 2.7     |
| A3069  | 37 $\mu$ M    | 1803                 | 26.2 $\pm$ 8.7            | 2.6 $\pm$ 2.0     |
| A3069  | 18 $\mu$ M    | 1894                 | 0.1 $\pm$ 16.5            | 2.6 $\pm$ 1.5     |
| A3069  | 9 $\mu$ M     | 1998                 | -                         | 2.7 $\pm$ 1.2     |

Figure S7. Micronucleus test (MNT) results for Compound 18.

TOX indicates high toxicity in the culture observed de visu by microscopy.

Table 1 (without metabolic activation)

| Sample      | Concentration | No. binucleate cells | % Cytostasis ( $\pm$ STD) | % MN ( $\pm$ STD) |
|-------------|---------------|----------------------|---------------------------|-------------------|
| CTR-        |               | 1972                 | -                         | 2.0 $\pm$ 0.8     |
| EBL-0002704 | 150 $\mu$ M   | -                    | TOX                       | -                 |
| EBL-0002704 | 75 $\mu$ M    | 703                  | 51.1 $\pm$ 22.3 (TOX)     | 1.9 $\pm$ 2.5     |
| EBL-0002704 | 37.5 $\mu$ M  | 1446                 | 6.9 $\pm$ 16.1            | 1.5 $\pm$ 1.6     |
| EBL-0002704 | 18.75 $\mu$ M | 1518                 | -                         | 1.3 $\pm$ 0.8     |

Table 2 (with metabolic activation)

| Sample      | Concentration | No. binucleate cells | % Cytostasis ( $\pm$ STD) | % MN ( $\pm$ STD) |
|-------------|---------------|----------------------|---------------------------|-------------------|
| CTR-        |               | 2026                 | -                         | 4.9 $\pm$ 1.0     |
| EBL-0002704 | 150 $\mu$ M   | 1961                 | -                         | 4.7 $\pm$ 1.3     |
| EBL-0002704 | 75 $\mu$ M    | 2176                 | -                         | 4.2 $\pm$ 1.5     |
| EBL-0002704 | 37.5 $\mu$ M  | 2143                 | -                         | 4.9 $\pm$ 1.7     |

Figure S8. Micronucleus test (MNT) results for Compound 27 (EBL-2704).

TOX indicates high toxicity in the culture observed de visu by microscopy.

| Plate Number | Plate Description           | Bacterial Strain | Number of Positively Scored Wells |       |       |       |       |
|--------------|-----------------------------|------------------|-----------------------------------|-------|-------|-------|-------|
|              |                             |                  | Day 3                             | Day 4 | Day 5 | Day 6 | Day 7 |
| 1            | Background                  | TA 100           | 8                                 | 19    | 25    | 41    | 44    |
| 2            | Positive Control: NaN3      | TA 100           | 81                                | 95    | 96    | 96    | 96    |
| 3            | Blanks                      | TA 100           | 0                                 | 0     | 0     | 0     | 0     |
| 4            | EBL2560 (LMD43) 25 uM       | TA 100           | 0                                 | 0     | 0     | 0     | 0     |
| 5            | EBL2560 (LMD43) 12.25 uM    | TA 100           | 0                                 | 0     | 0     | 0     | 0     |
| 6            | EBL2560 (LMD43) 6.3 uM      | TA 100           | 0                                 | 0     | 0     | 0     | 0     |
| 7            | EBL-2560 (LMD43) 2 uM       | TA 100           | 0                                 | 0     | 0     | 0     | 0     |
| 8            | Background S9               | TA 100+S9        | 25                                | 27    | 31    | 32    | 35    |
| 9            | Positive Control: 2-AA S9   | TA 100+S9        | 81                                | 84    | 85    | 85    | 85    |
| 10           | Blanks S9                   | TA 100+S9        | 0                                 | 0     | 0     | 0     | 0     |
| 11           | EBL2560 (LMD43) 25 uM S9    | TA 100+S9        | 0                                 | 0     | 0     | 0     | 0     |
| 12           | EBL2560 (LMD43) 12.25 uM S9 | TA 100+S9        | 0                                 | 0     | 0     | 0     | 0     |
| 13           | EBL2560 (LMD43) 6.3 uM S9   | TA 100+S9        | 0                                 | 0     | 0     | 0     | 0     |
| 14           | EBL2560 (LMD43) 2 uM S9     | TA 100+S9        | 0                                 | 0     | 0     | 0     | 0     |

Figure S9. Mutagenic activity of Compound 1 (EBL-2560) using *S. typhimurium* TA100 with and without S9 activation scored on days 3 to 7 of growth (AMES test).

| TA100 +S9           |            |                       |              |              |                                    |
|---------------------|------------|-----------------------|--------------|--------------|------------------------------------|
| Sample              | Conc. (µM) | Number positive wells |              |              | Mutagenic Conc. / Cytotoxic Effect |
|                     |            | Replicate #1          | Replicate #2 | Replicate #3 |                                    |
| EBL2704 (vial 3136) | 0          | 6                     | 5            | 9            |                                    |
|                     | 0.1        | 9                     | 8            | 5            |                                    |
|                     | 3          | 2                     | 2            | 4            | Cytotoxic effect?                  |
|                     | 6          | 2                     | 1            | 5            | Cytotoxic effect?                  |
|                     | 12.25      | 1                     | 1            | 3            | Cytotoxic effect?                  |
|                     | 25         | 1                     | 0            | 0            | Cytotoxic effect?                  |
| 2-AA                | 2.5 µg/mL  | 48                    | 48           | 48           | Mutagenic Conc.                    |
| TA100 -S9           |            |                       |              |              |                                    |
| Sample              | Conc. (µM) | Number positive wells |              |              | Mutagenic Conc. / Cytotoxic Effect |
|                     |            | Replicate #1          | Replicate #2 | Replicate #3 |                                    |
| EBL2704 (vial 3136) | 0          | 3                     | 3            | 3            |                                    |
|                     | 0.1        | 4                     | 2            | 6            |                                    |
|                     | 3          | 4                     | 3            | 5            |                                    |
|                     | 6          | 1                     | 3            | 2            |                                    |
|                     | 12.25      | 2                     | 1            | 4            |                                    |
|                     | 25         | 0                     | 0            | 0            | Cytotoxic effect?                  |
| 4-NQQ               | 0.1 µg/mL  | 48                    | 48           | 47           | Mutagenic Conc.                    |

Figure S10. Mutagenic activity of Compound 27 (EBL-2704) using *S. typhimurium* TA100 with (top) and without (bottom) S9 activation (AMES test). Positive controls: 4-NQQ = 4-nitroquinoline-*N*-oxide; 2-AA = 2-aminoanthracene.

| TA98 -S9             |            |                       |              |              |                                    |
|----------------------|------------|-----------------------|--------------|--------------|------------------------------------|
| Sample               | Conc. (µM) | Number positive wells |              |              | Mutagenic Conc. / Cytotoxic Effect |
|                      |            | Replicate #1          | Replicate #2 | Replicate #3 |                                    |
| EBL2837 (vial 3137)  | 0          | 1                     | 0            | 0            |                                    |
|                      | 0.1        | 0                     | 0            | 0            |                                    |
|                      | 3          | 0                     | 0            | 0            |                                    |
|                      | 6          | 0                     | 0            | 0            |                                    |
|                      | 12.25      | 0                     | 0            | 0            |                                    |
|                      | 25         | 0                     | 0            | 0            |                                    |
| 2-NF                 | 2 µg/mL    | 34                    | 36           | 33           | Mutagenic Conc.                    |
| TA98 +S9             |            |                       |              |              |                                    |
| Sample               | Conc. (µM) | Number positive wells |              |              | Mutagenic Conc. / Cytotoxic Effect |
|                      |            | Replicate #1          | Replicate #2 | Replicate #3 |                                    |
| EBL2837 (vial 3137)) | 0          | 0                     | 2            | 3            |                                    |
|                      | 0.1        | 1                     | 1            | 2            |                                    |
|                      | 3          | 0                     | 0            | 0            | Cytotoxic effect?                  |
|                      | 6          | 0                     | 0            | 0            | Cytotoxic effect?                  |
|                      | 12.25      | 0                     | 0            | 0            | Cytotoxic effect?                  |
|                      | 25         | 0                     | 0            | 0            | Cytotoxic effect?                  |
| 2-AA                 | 1 µg/mL    | 42                    | 45           | 44           | Mutagenic Conc.                    |

Figure S11. Mutagenic activity of Compound 31 (EBL-2837) using *S. typhimurium* TA98 with (top) and without (bottom) S9 activation (AMES test). Positive controls: 2-NF = 2-nitrofluorene; 2-AA = 2-aminoanthracene.

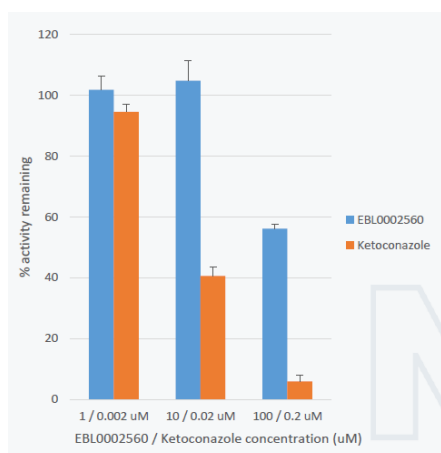

Figure S12. CYP3A4 inhibition assay of Compound 1.

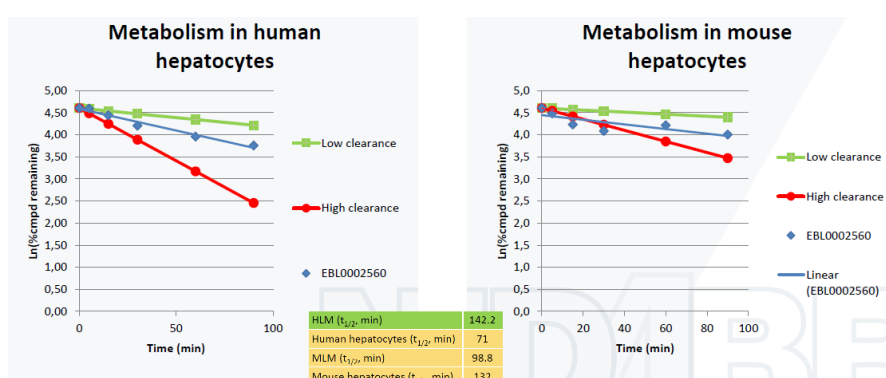

Figure S13. Metabolism of Compound 1 (EBL-2560) in human and mouse hepatocytes, and human (HLM) and mouse (MLM) liver microsomes.

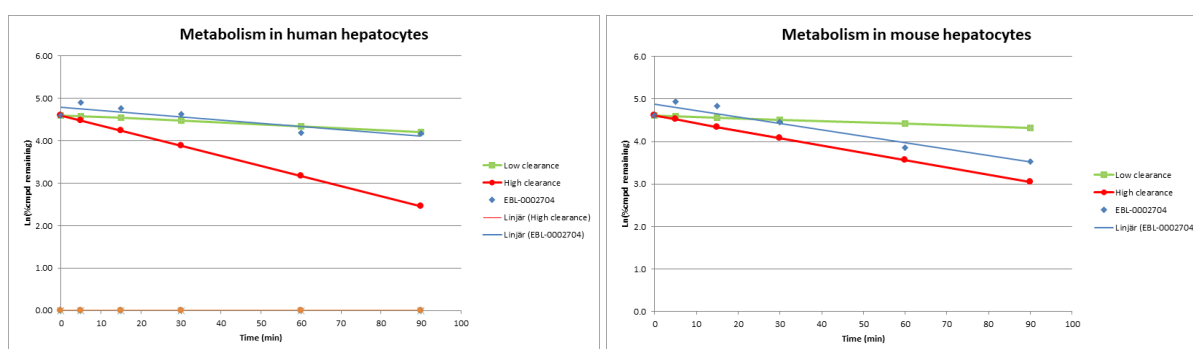

Figure S14. Metabolism of Compound 27 (EBL-2704) in human (left) and mouse (right) hepatocytes.

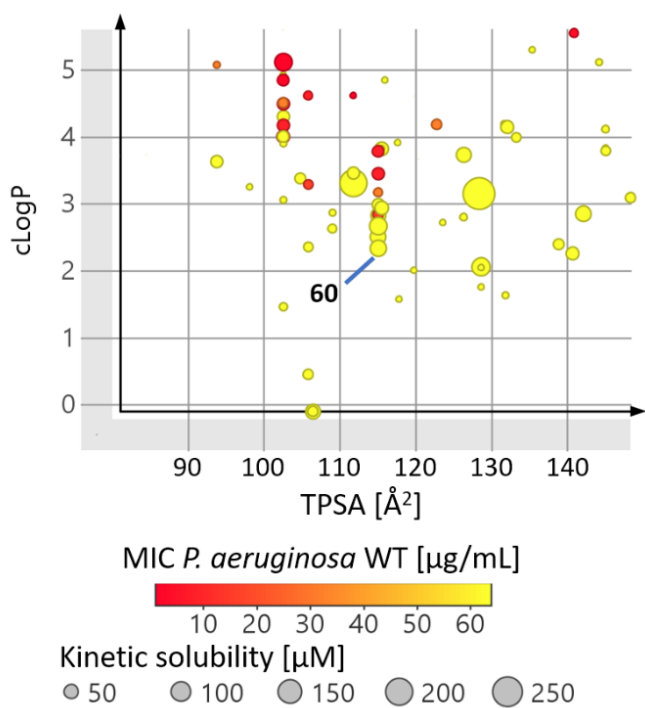

Figure S15. Relationship between cLogP, TPSA, kinetic solubility, and MIC against *P. aeruginosa*.

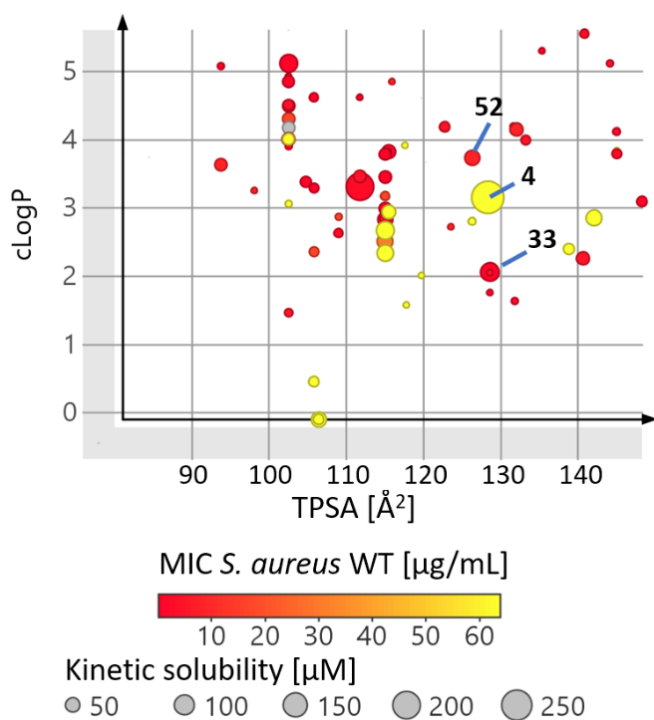

Figure S16. Relationship between cLogP, TPSA, kinetic solubility, and MIC against *S. aureus*.

## NMR Spectra

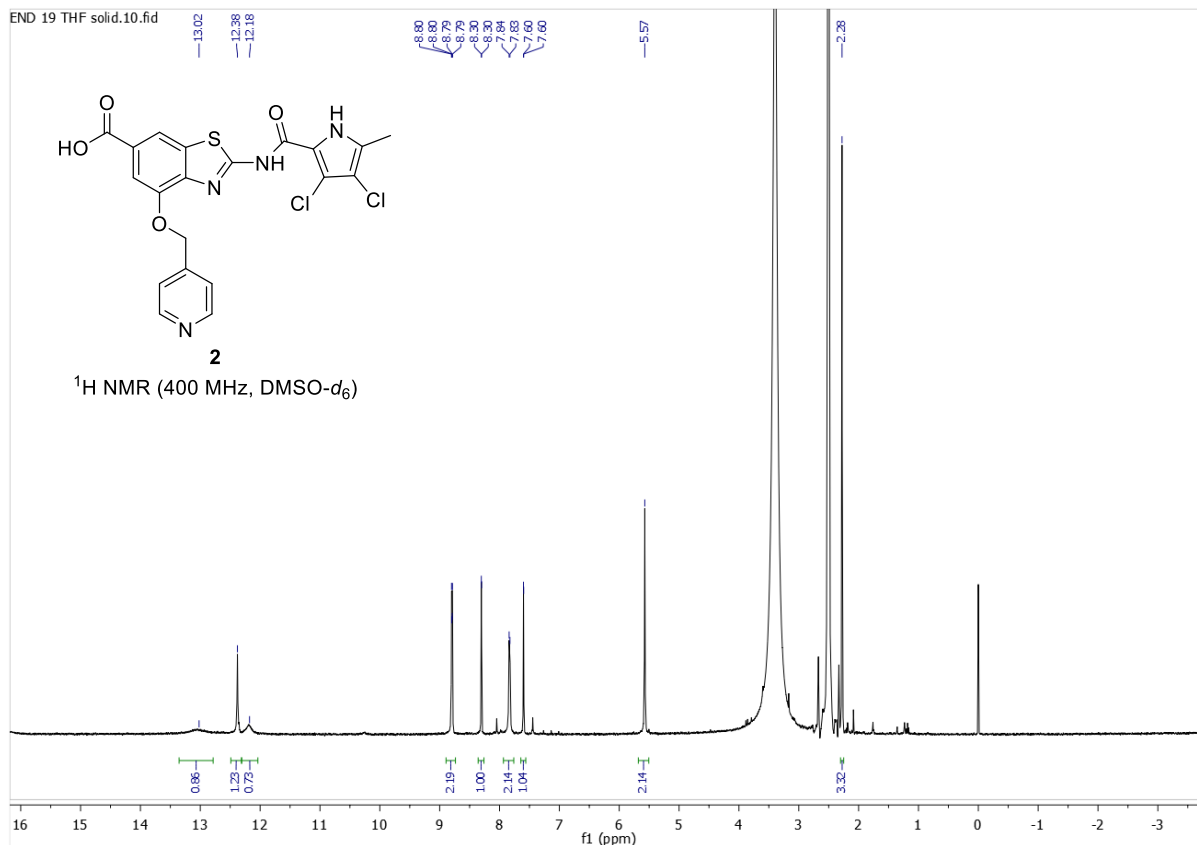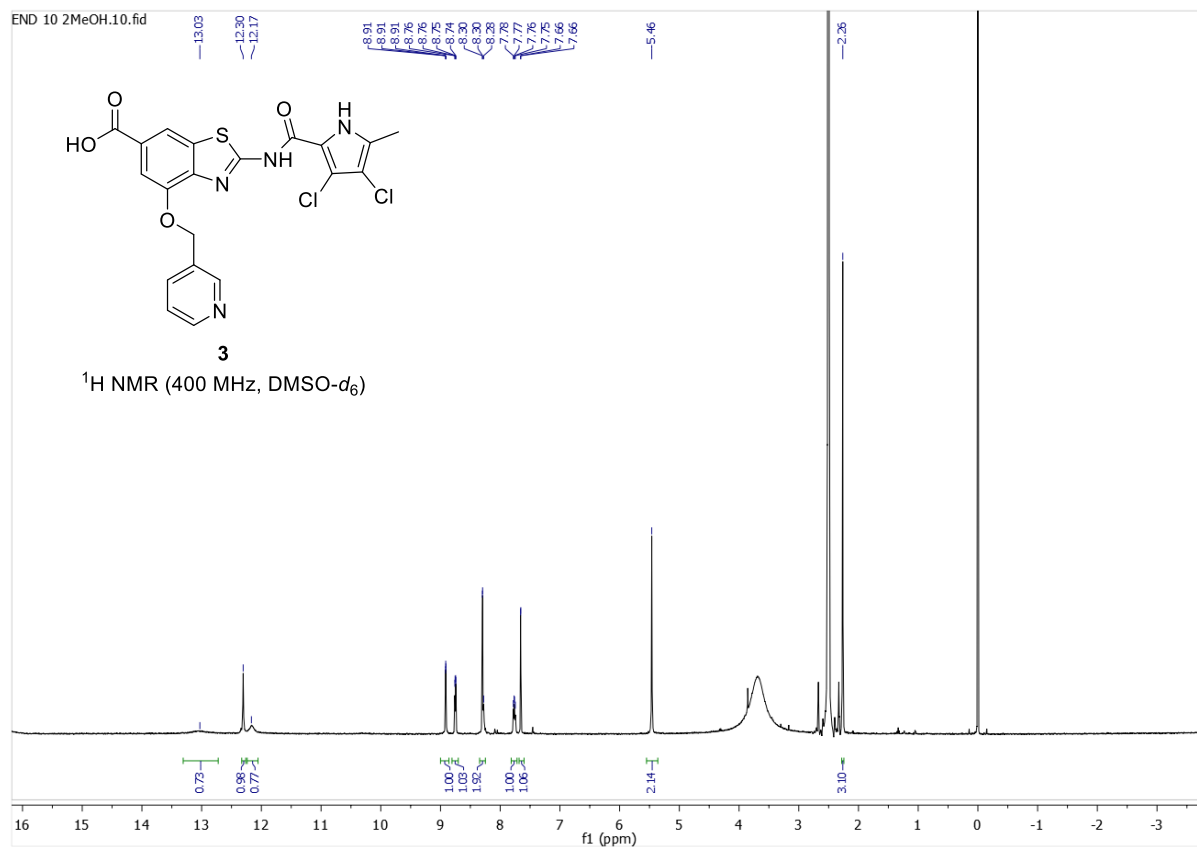



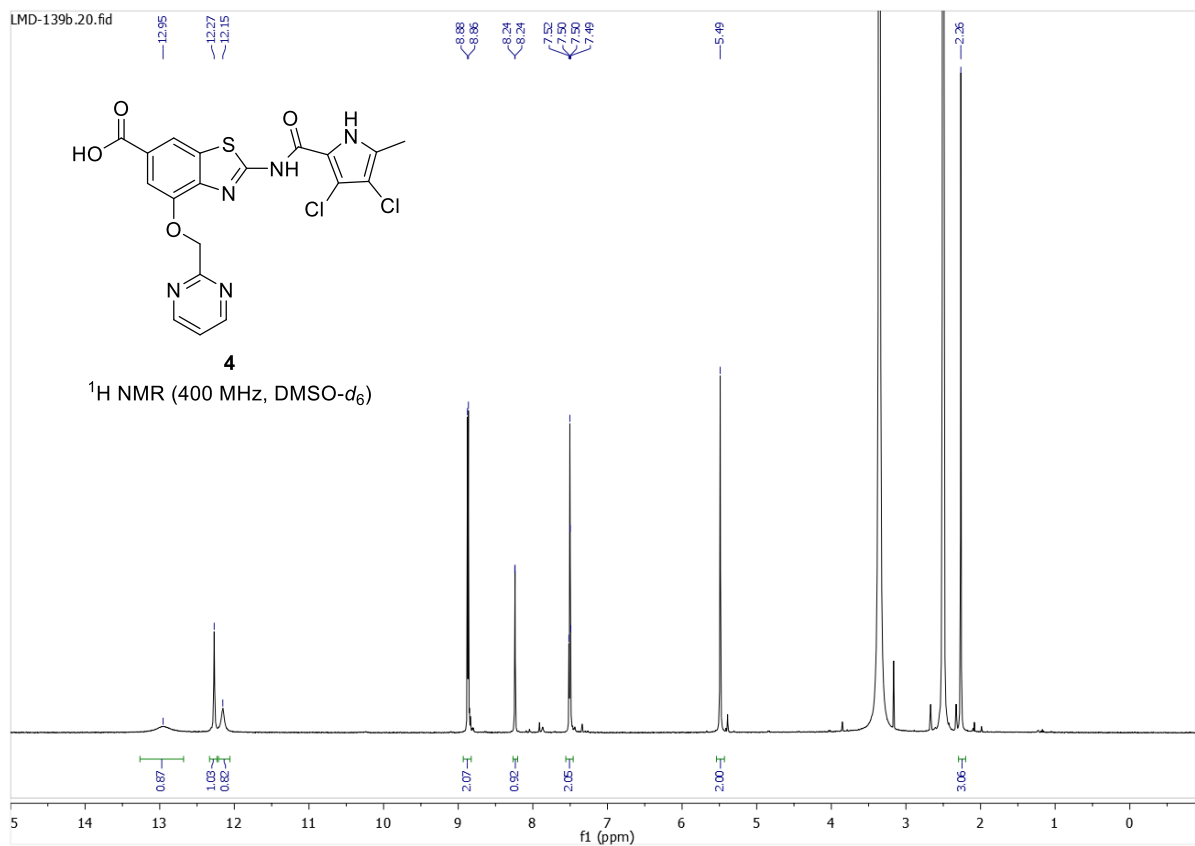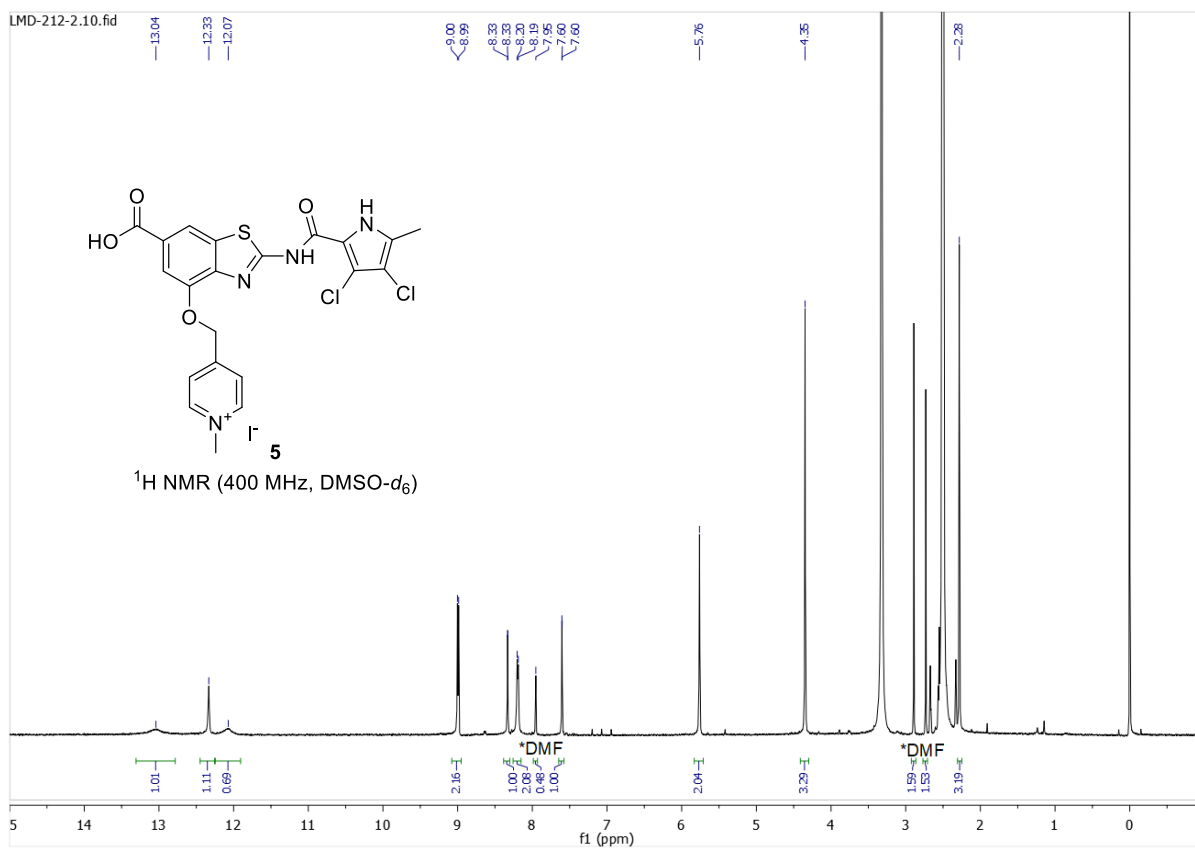

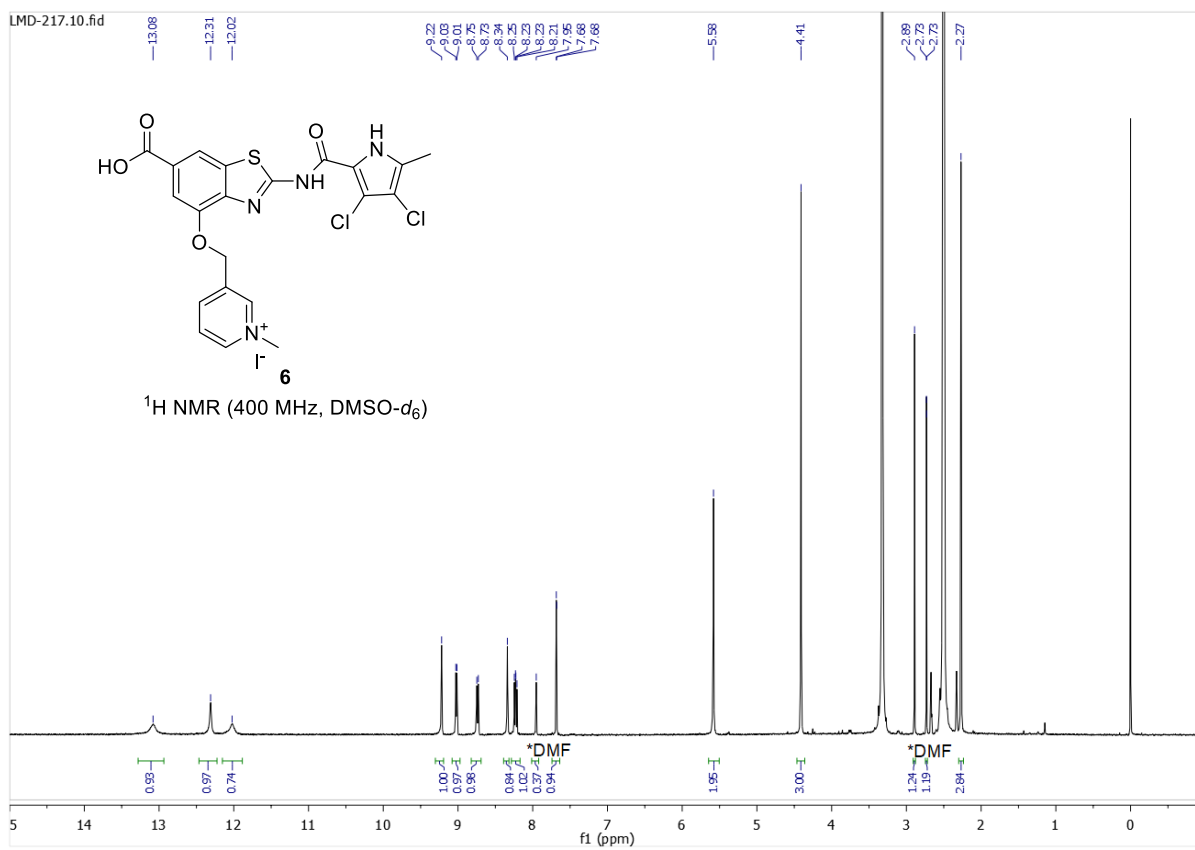

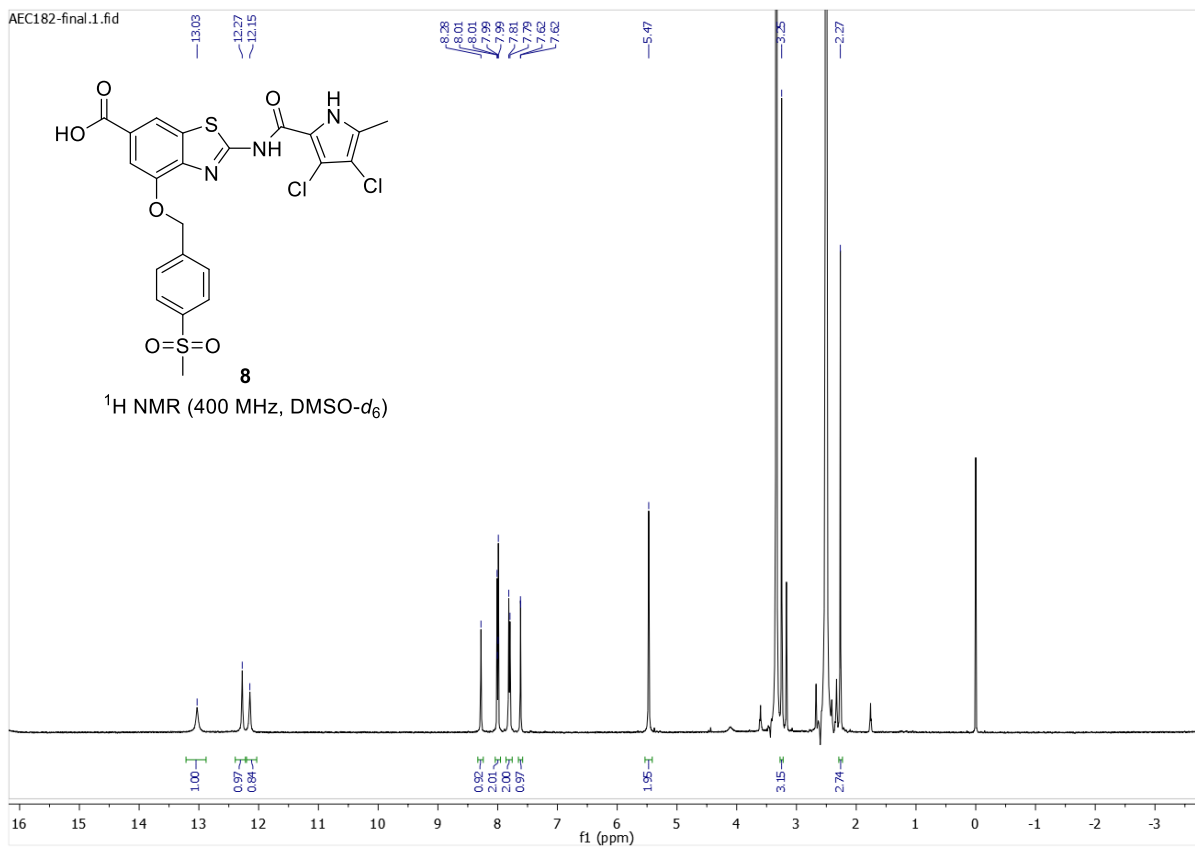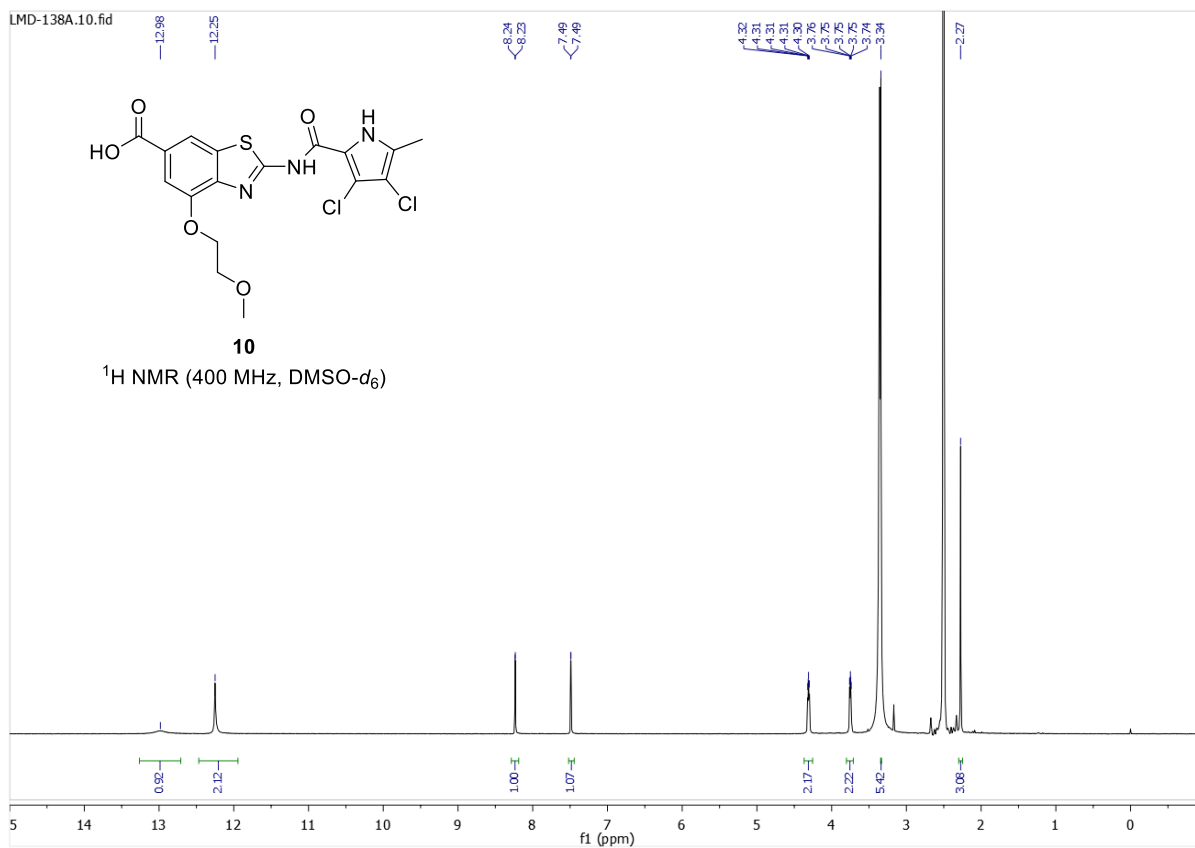

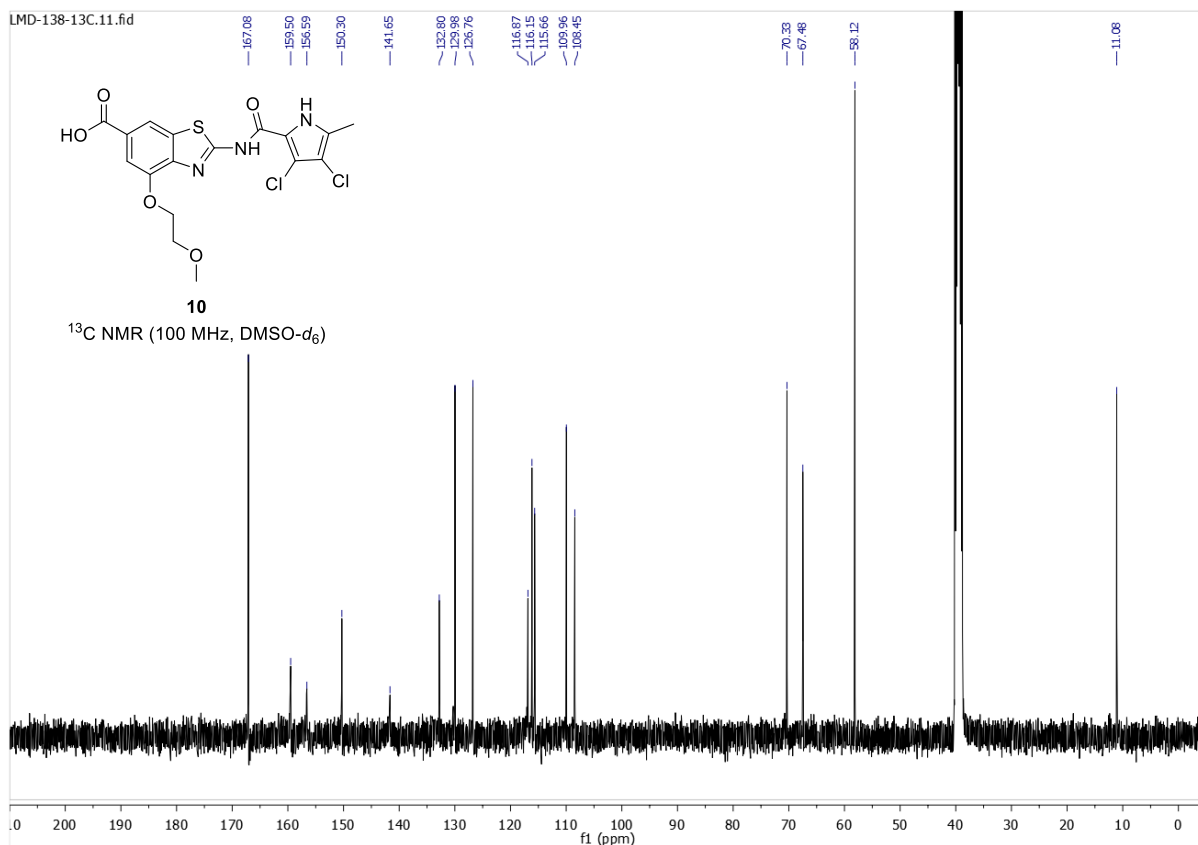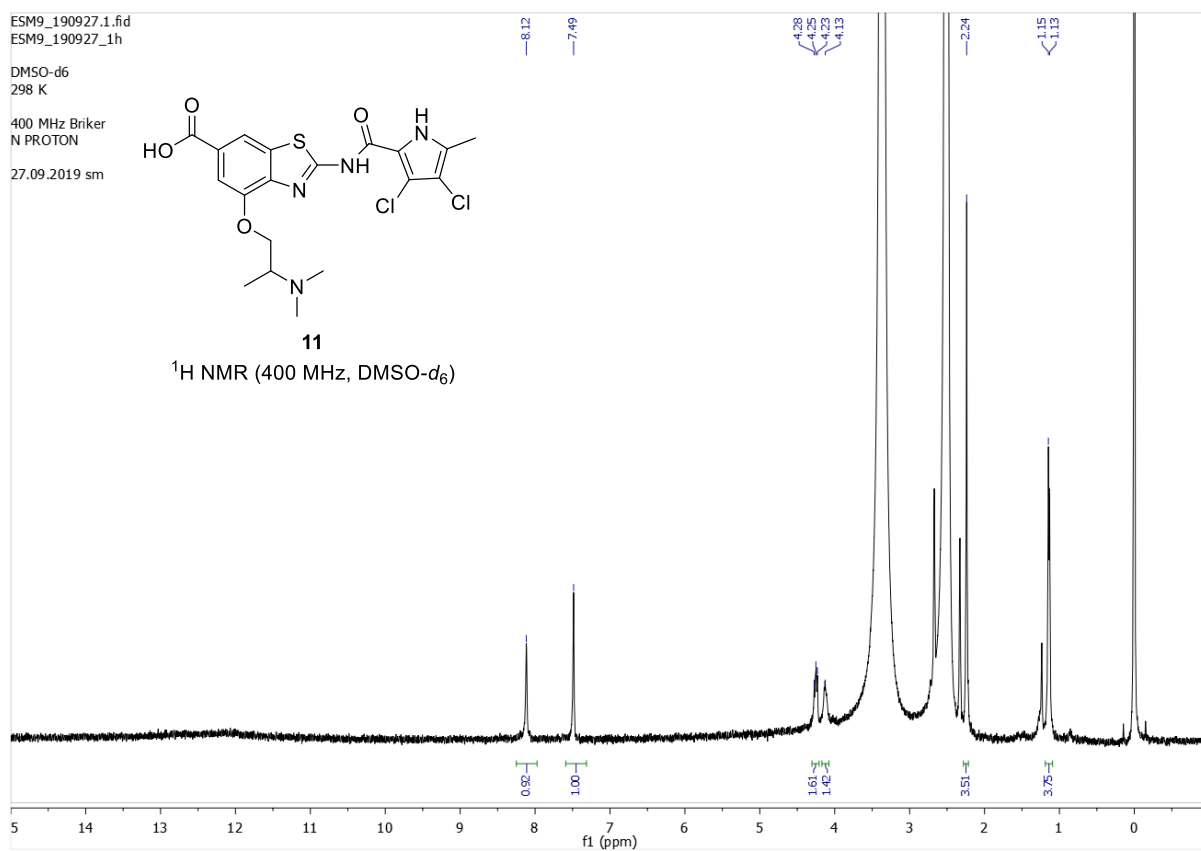

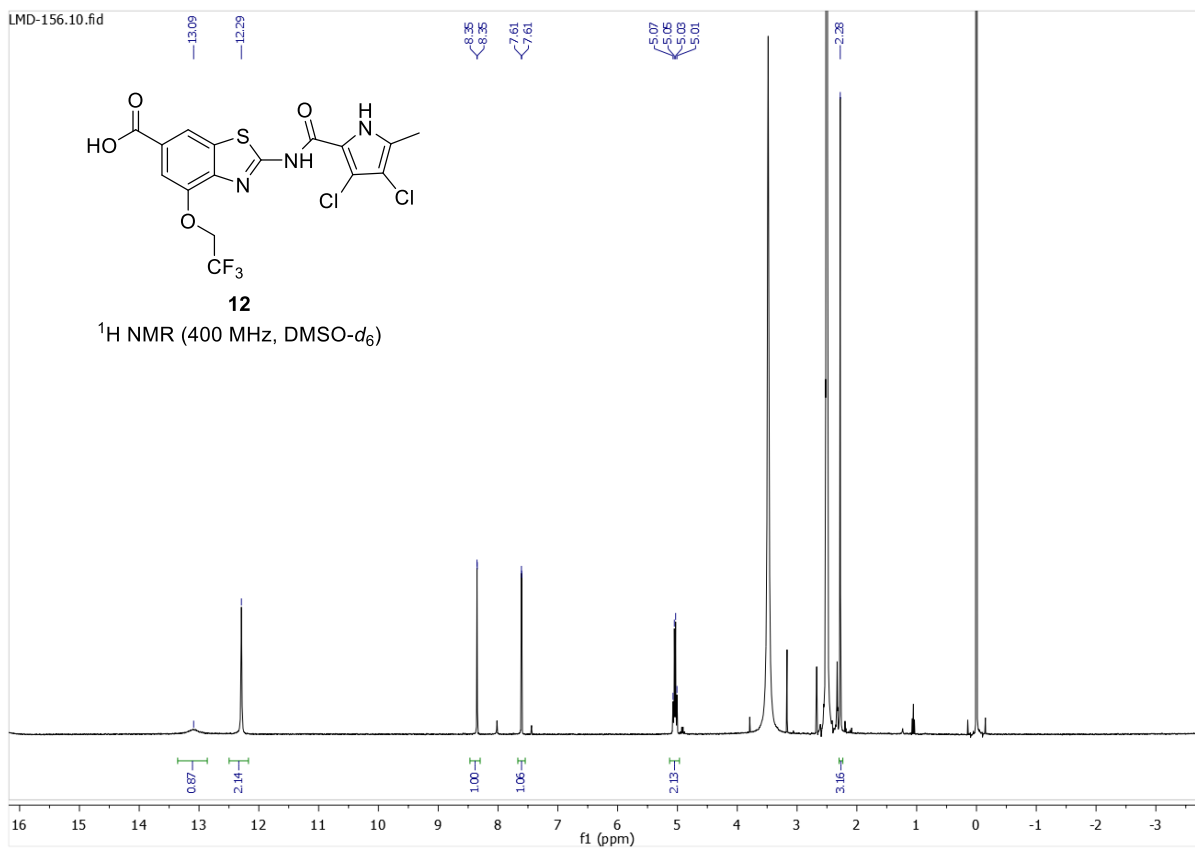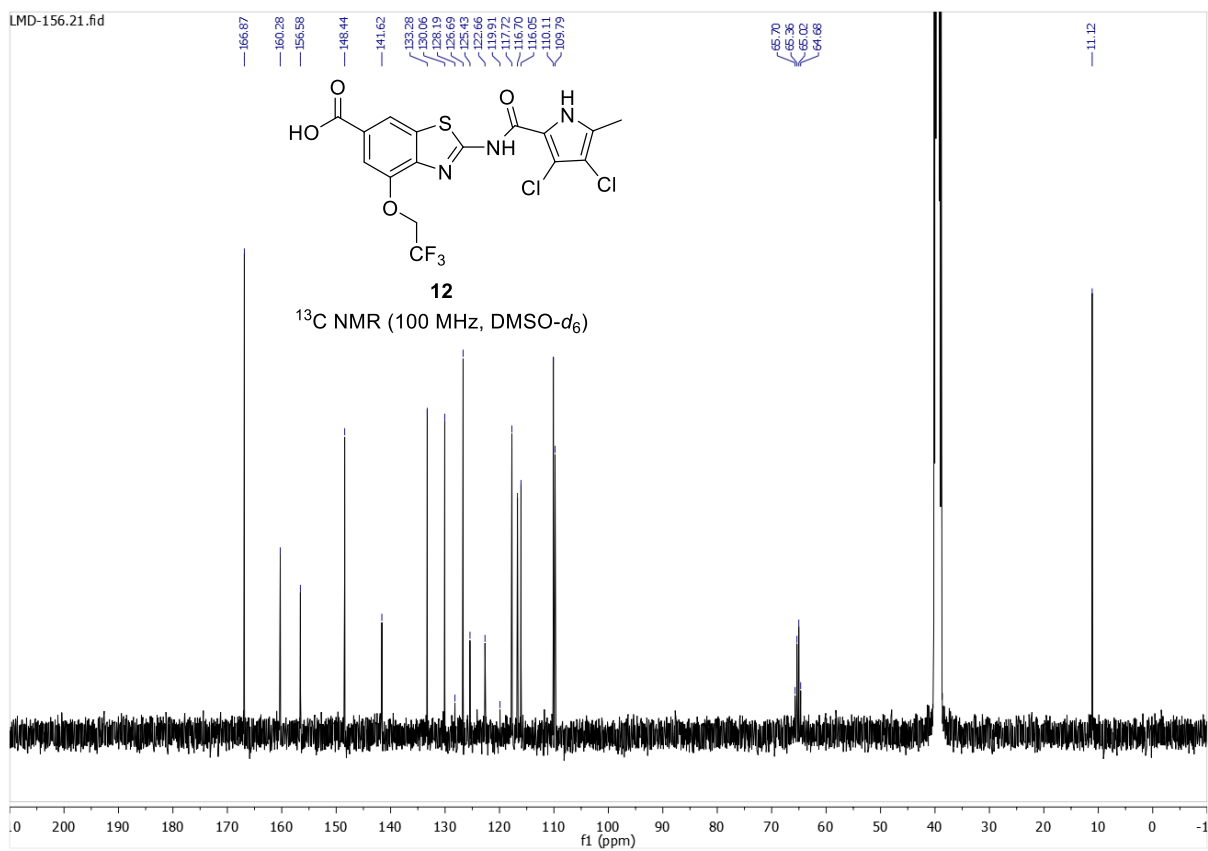

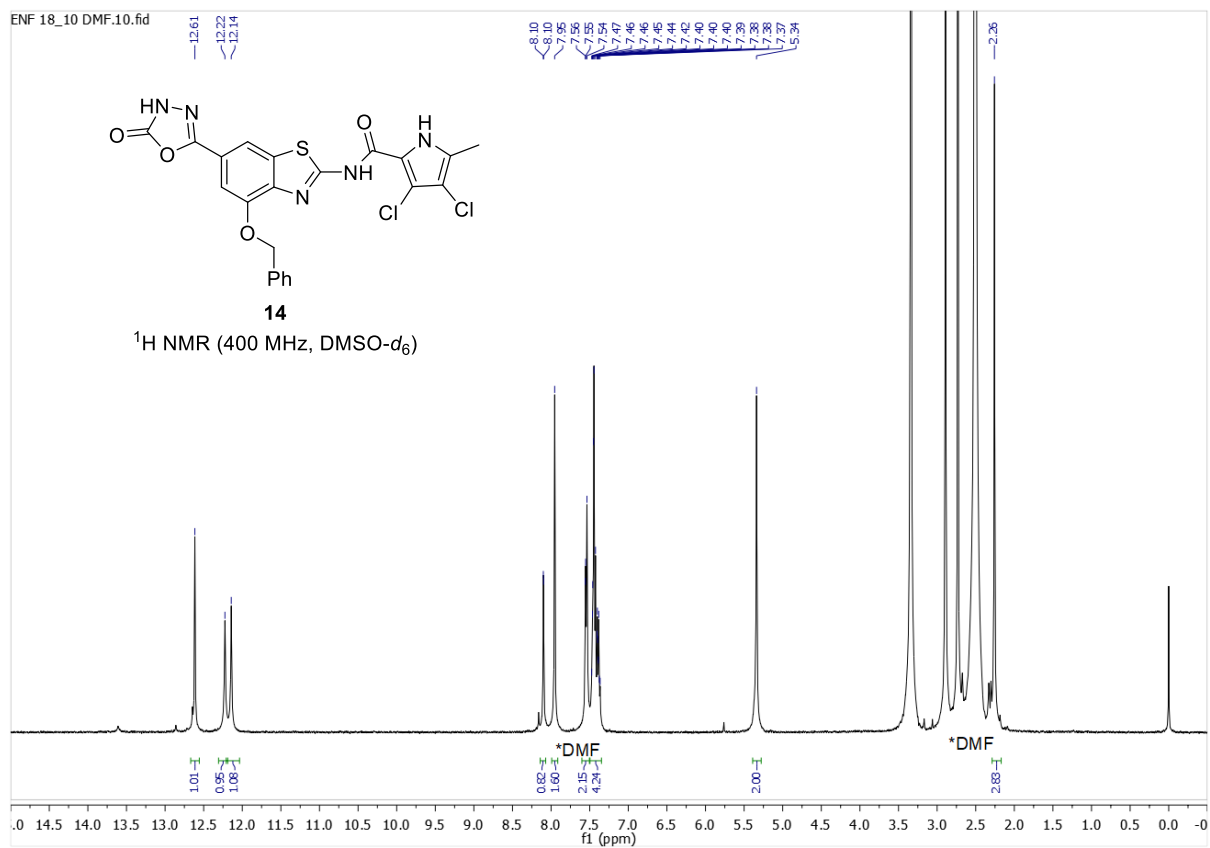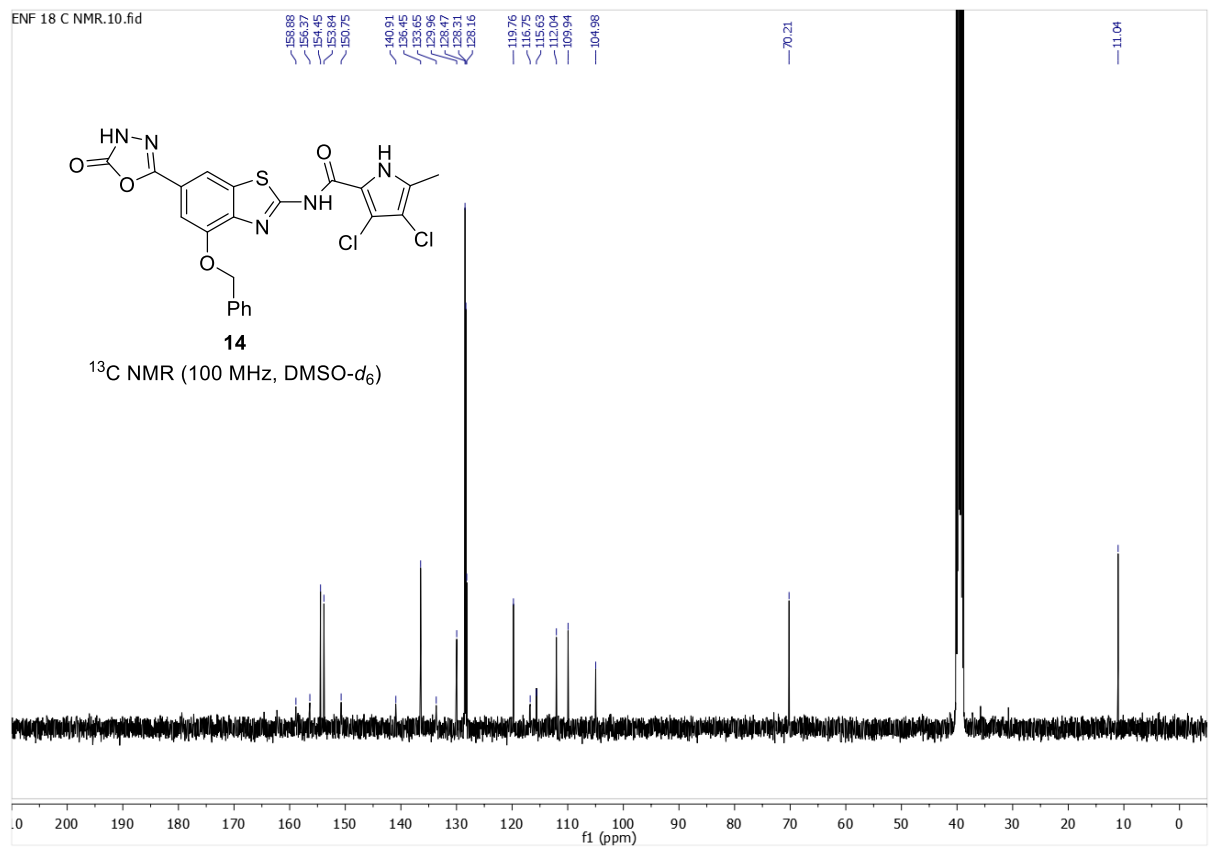

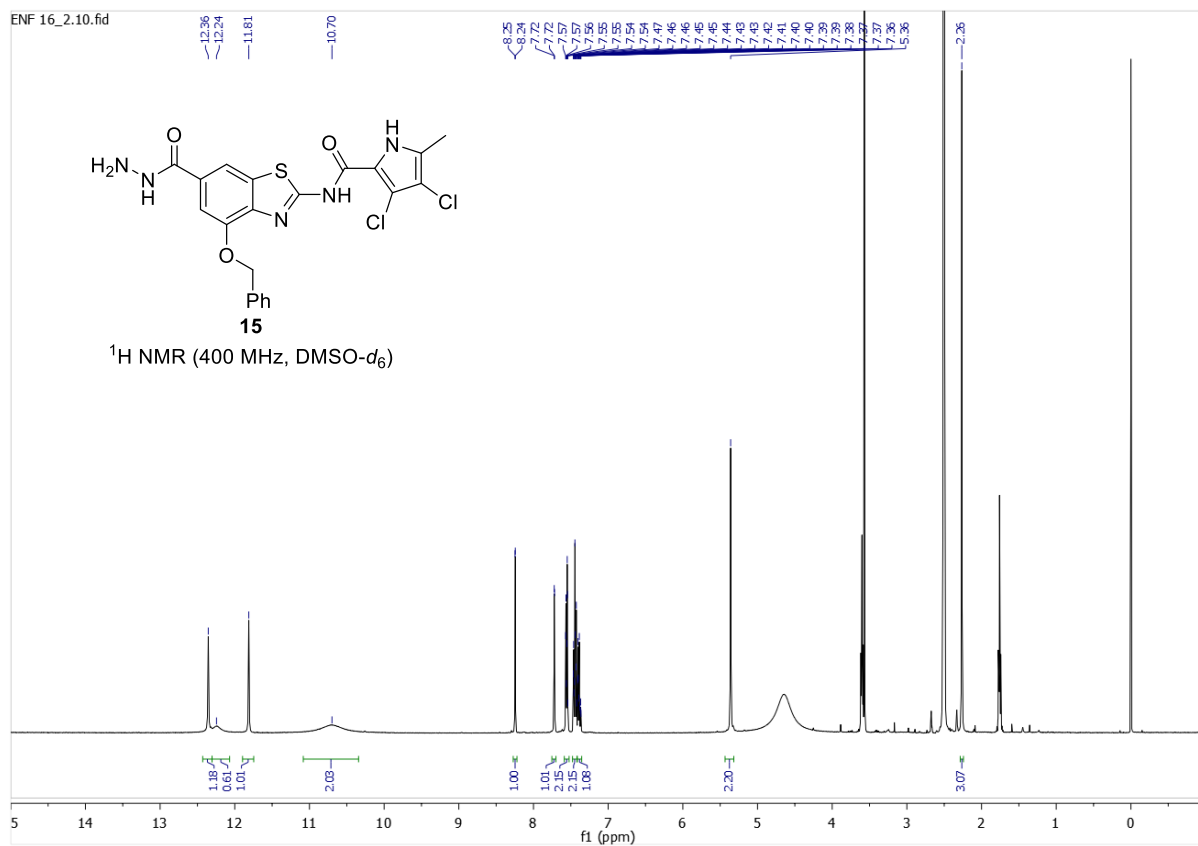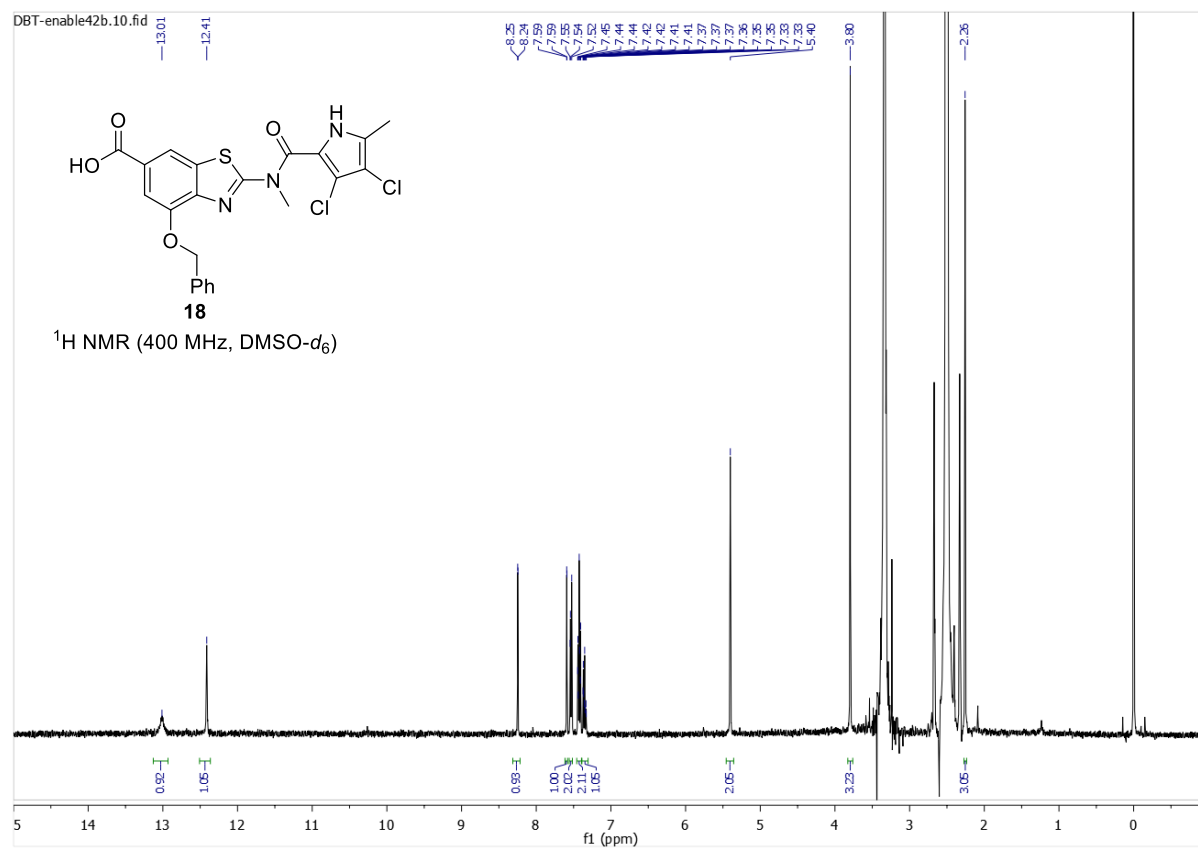

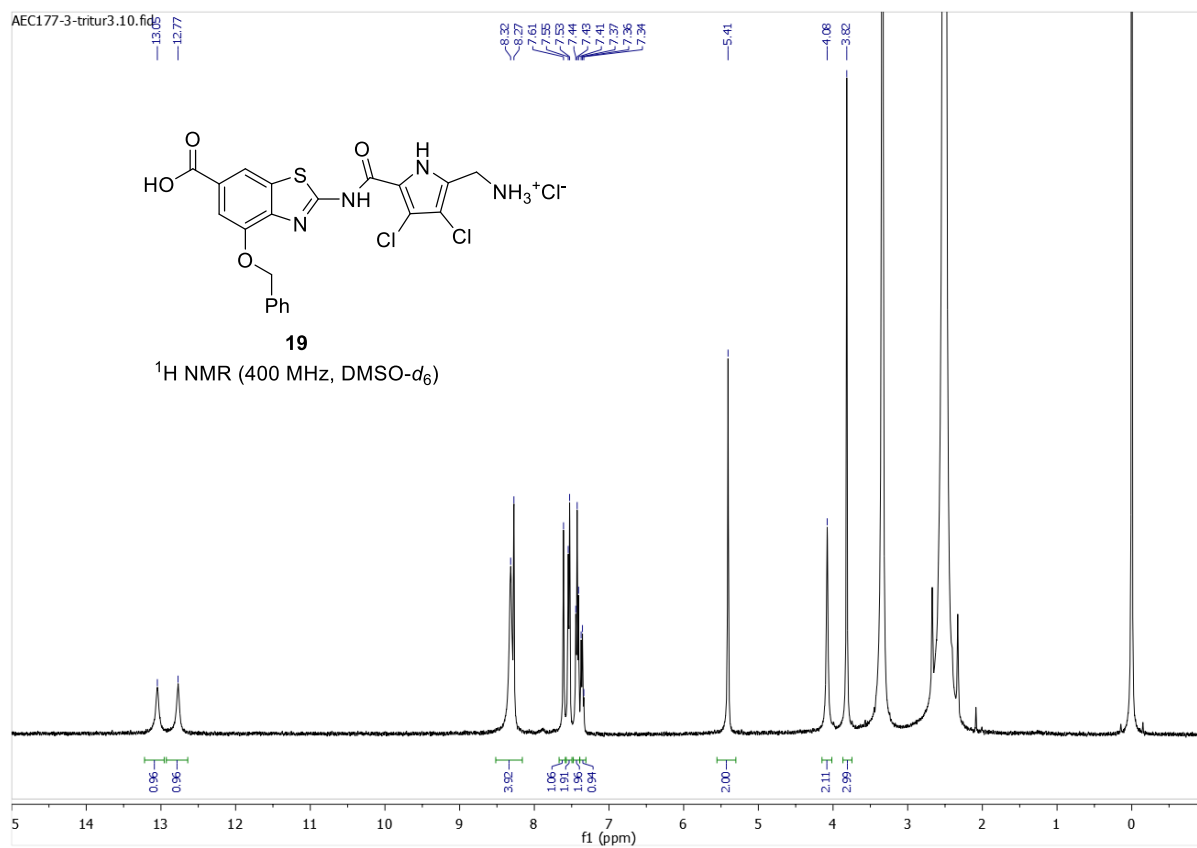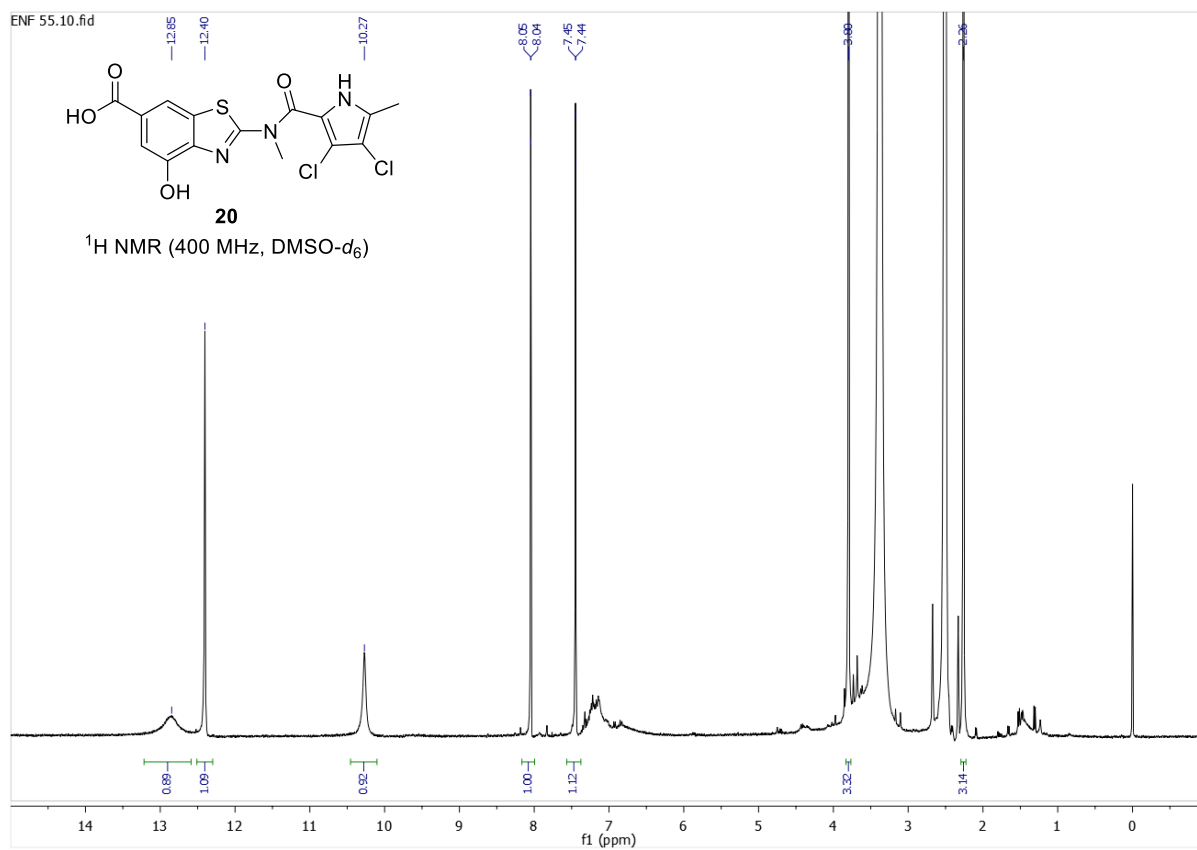



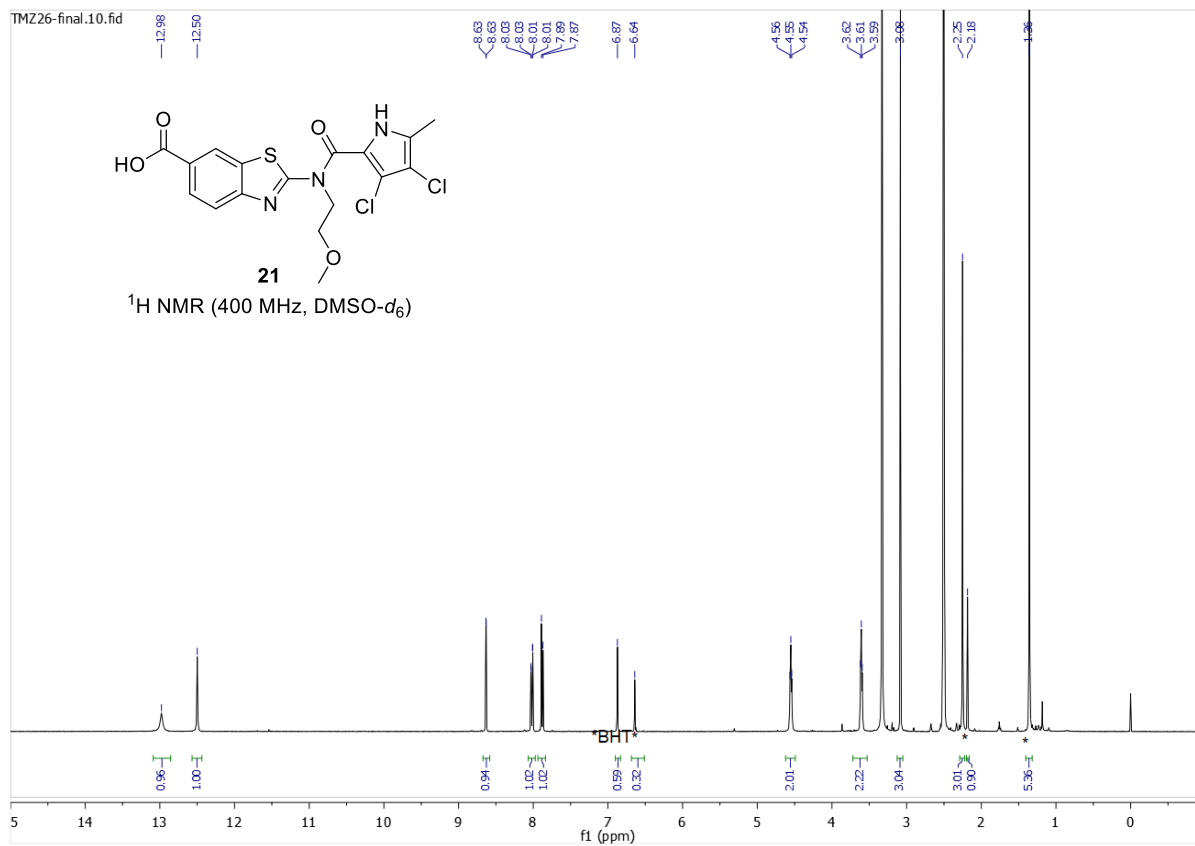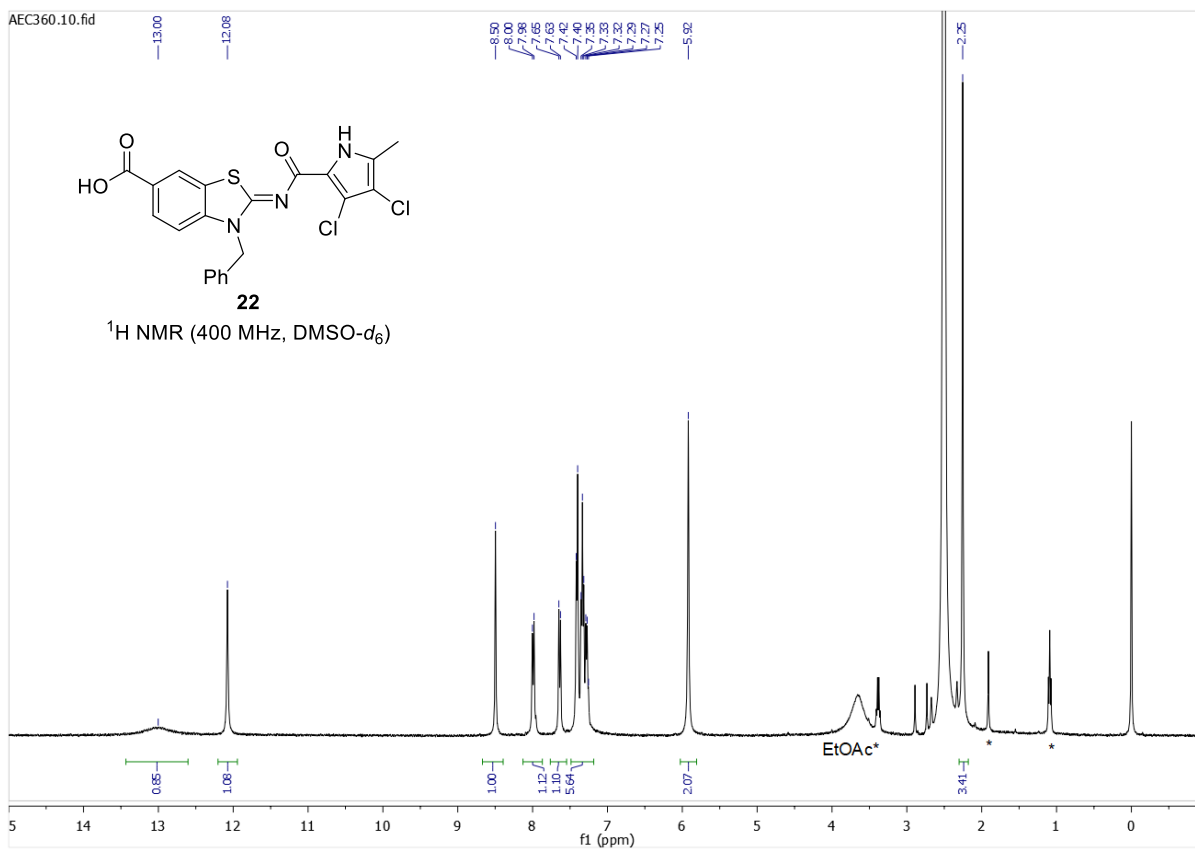

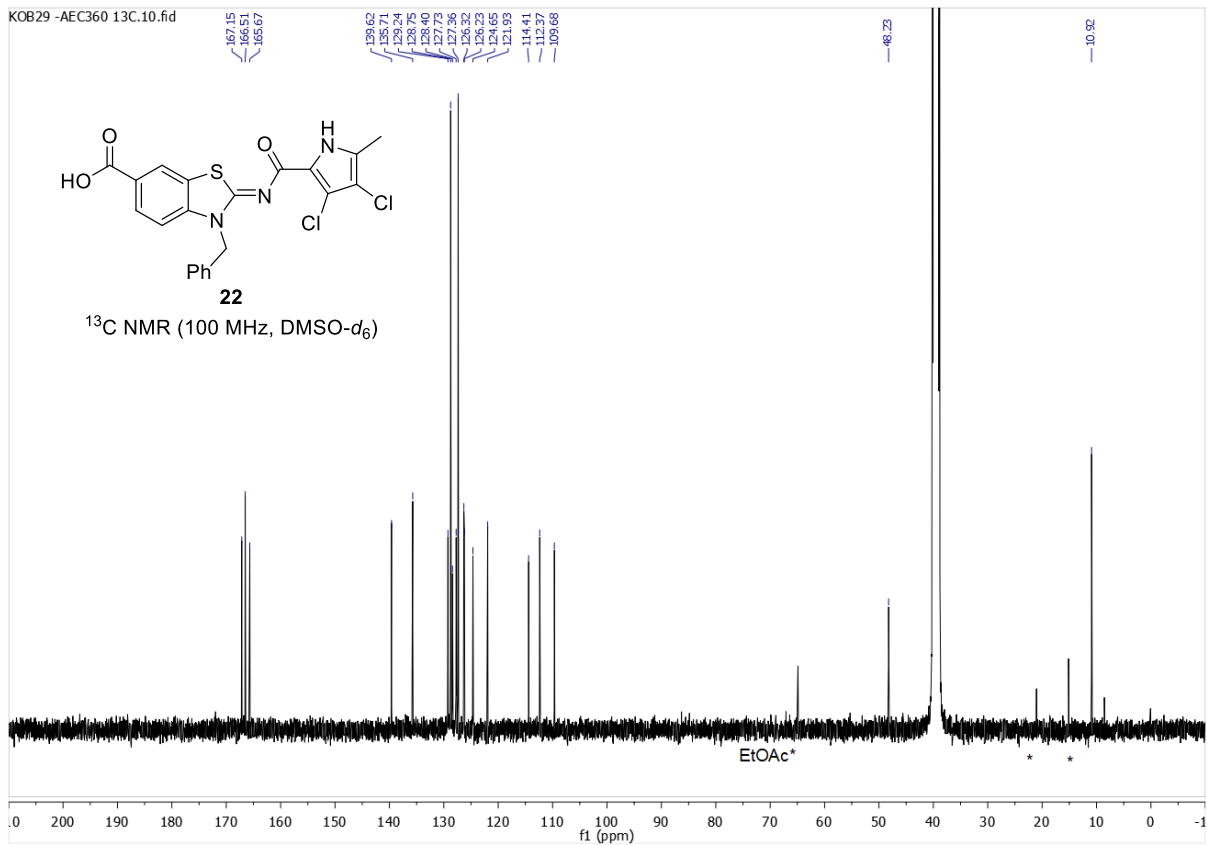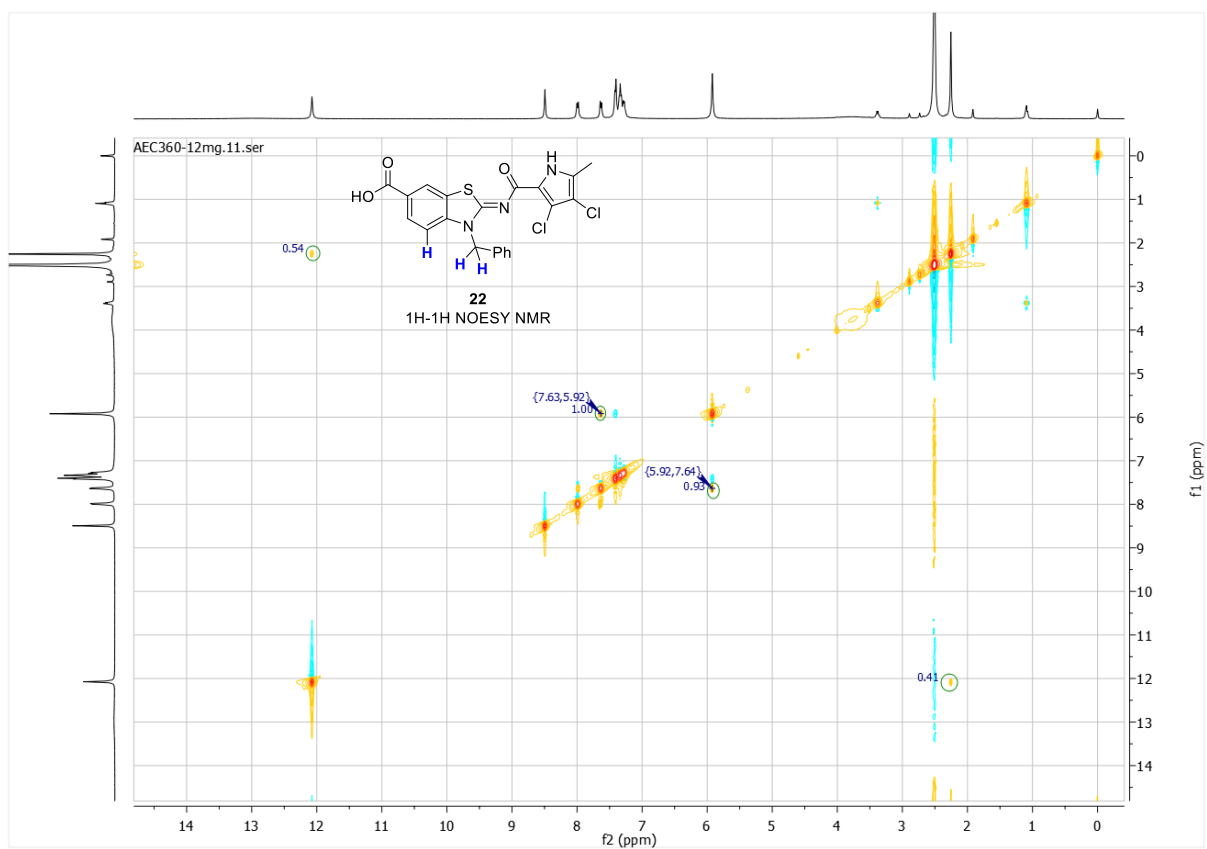

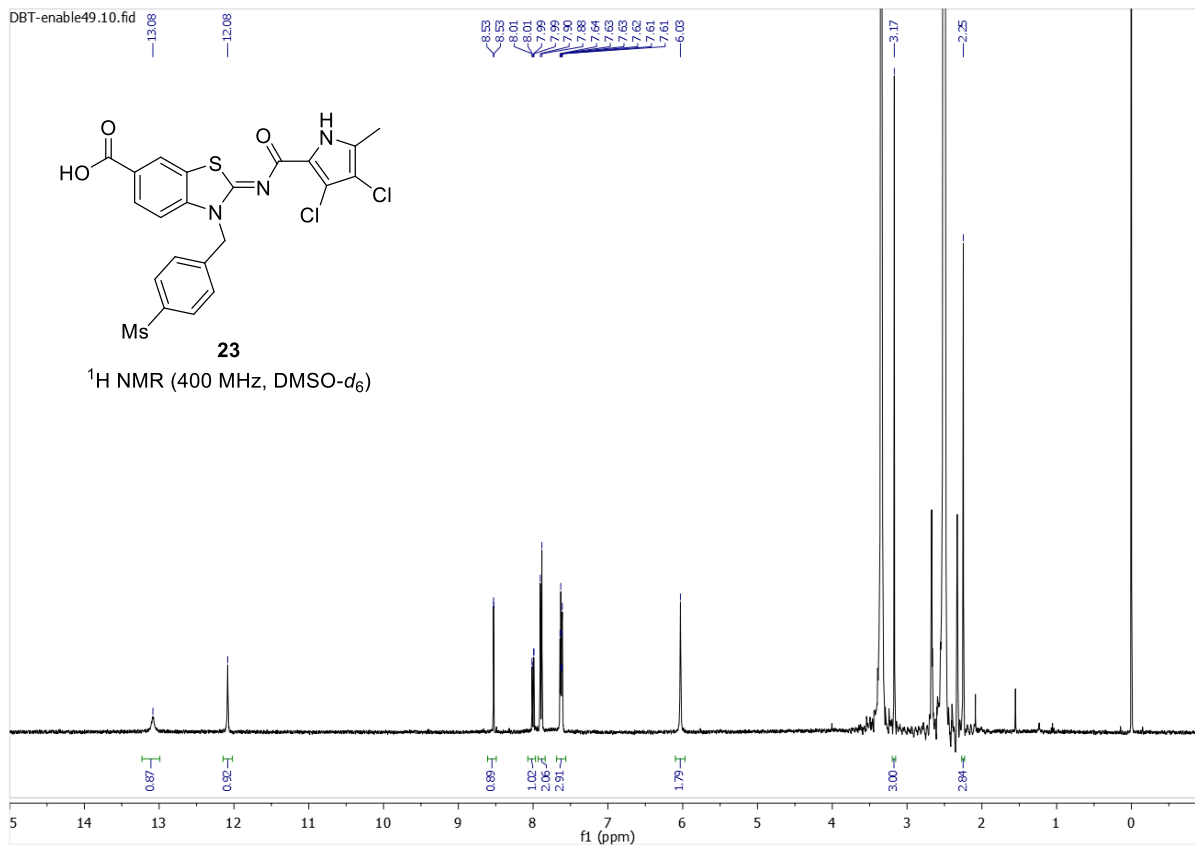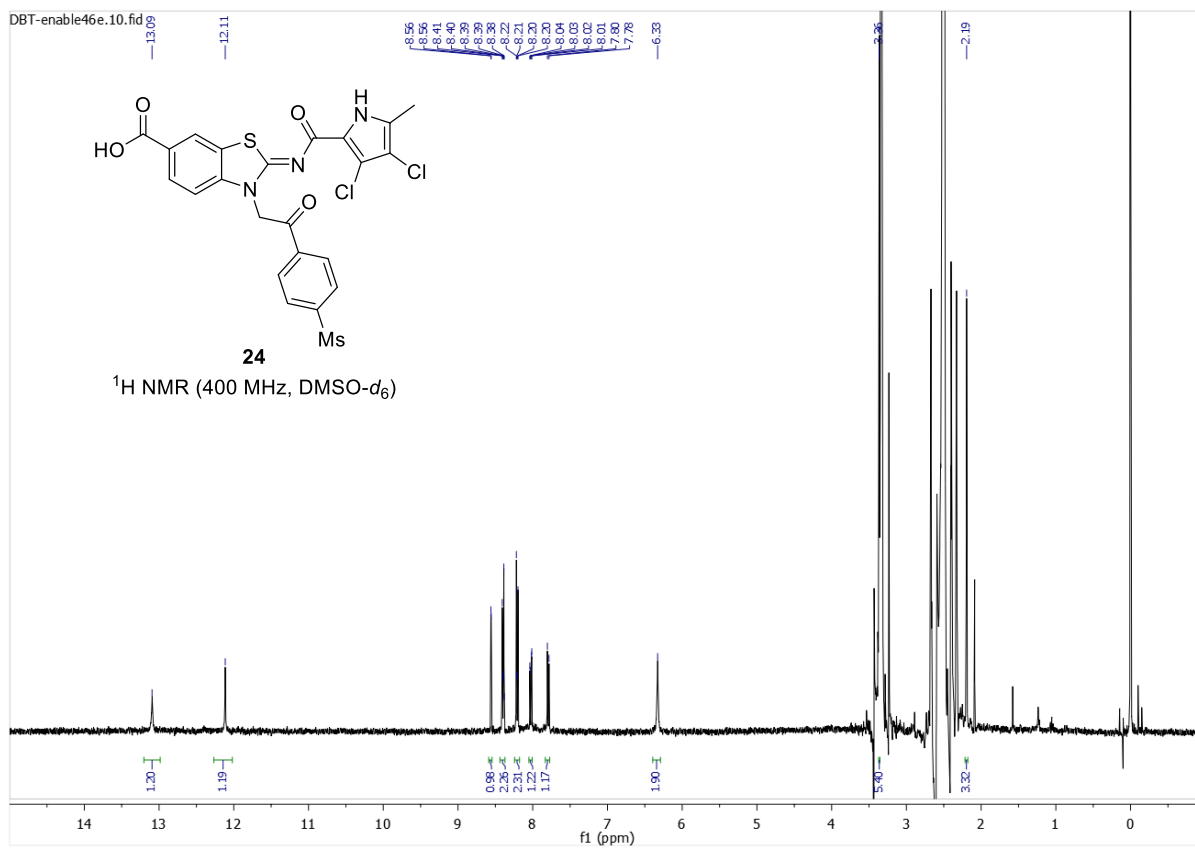

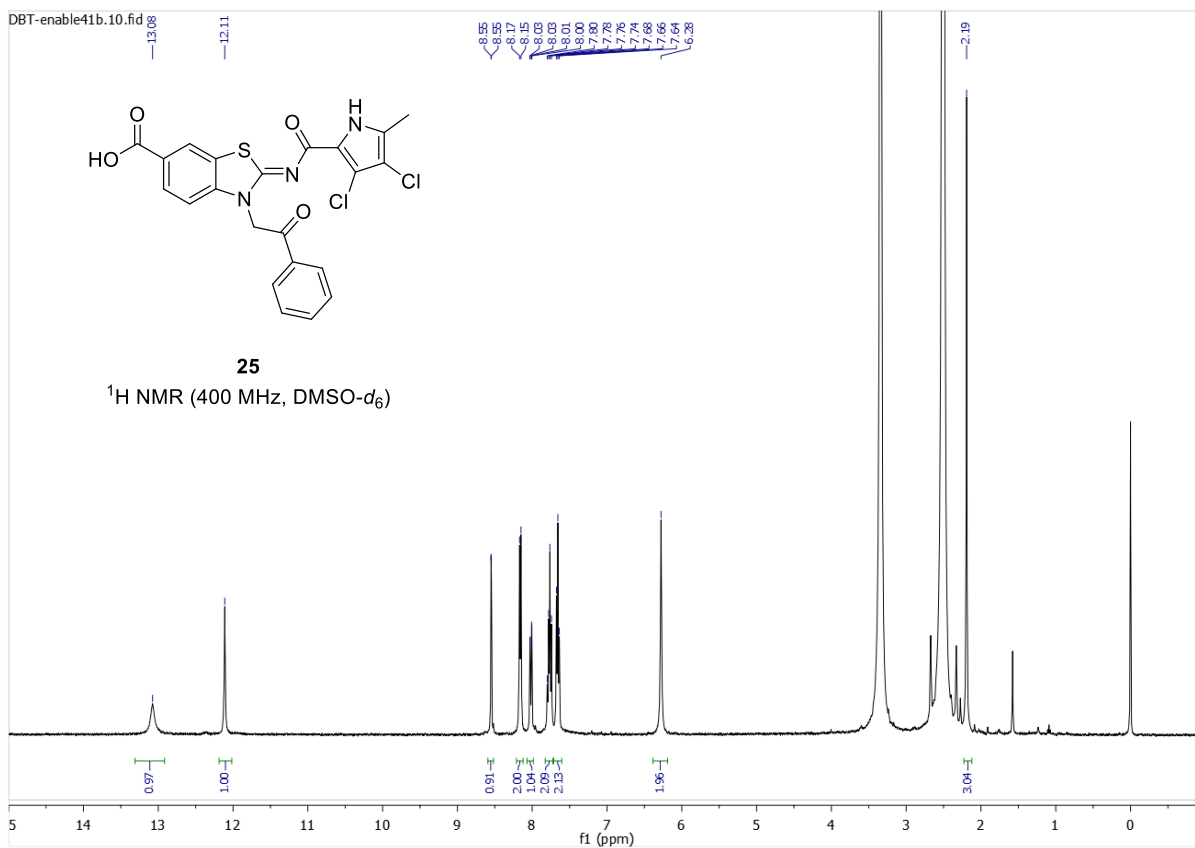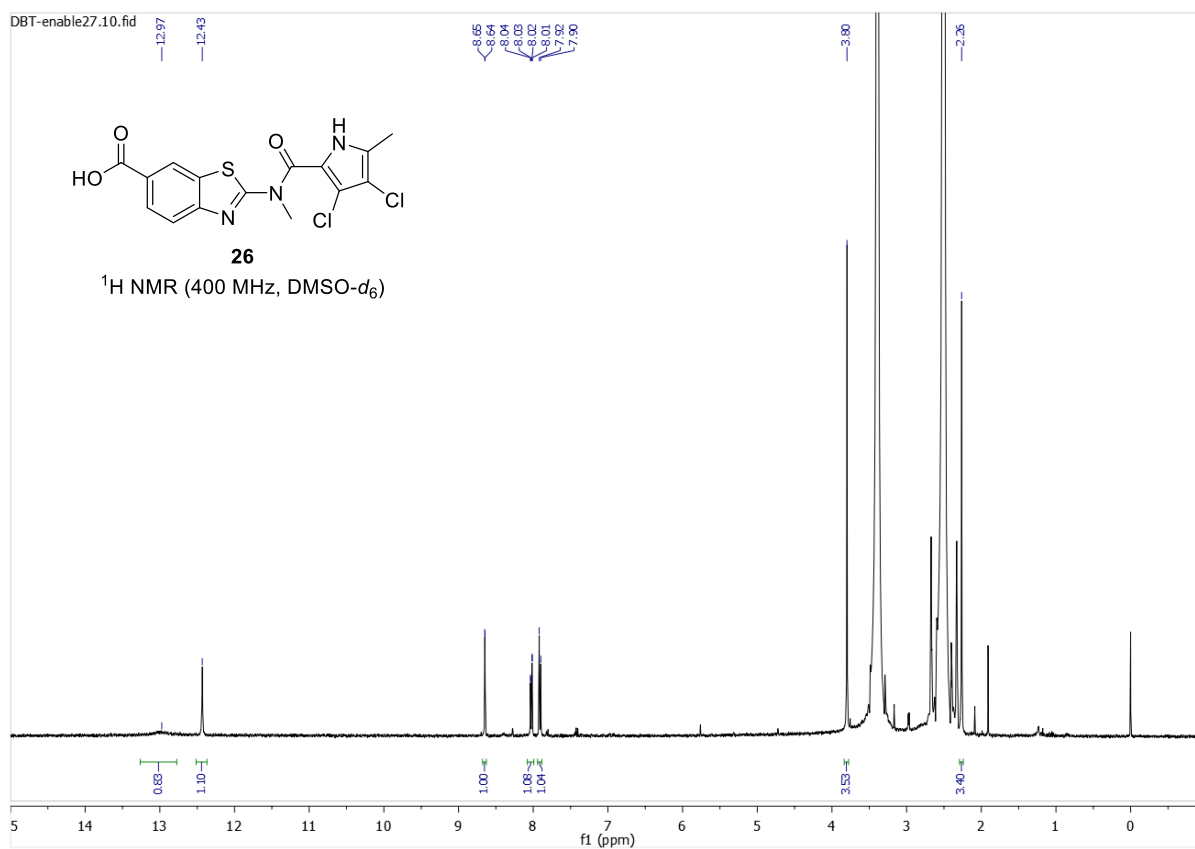

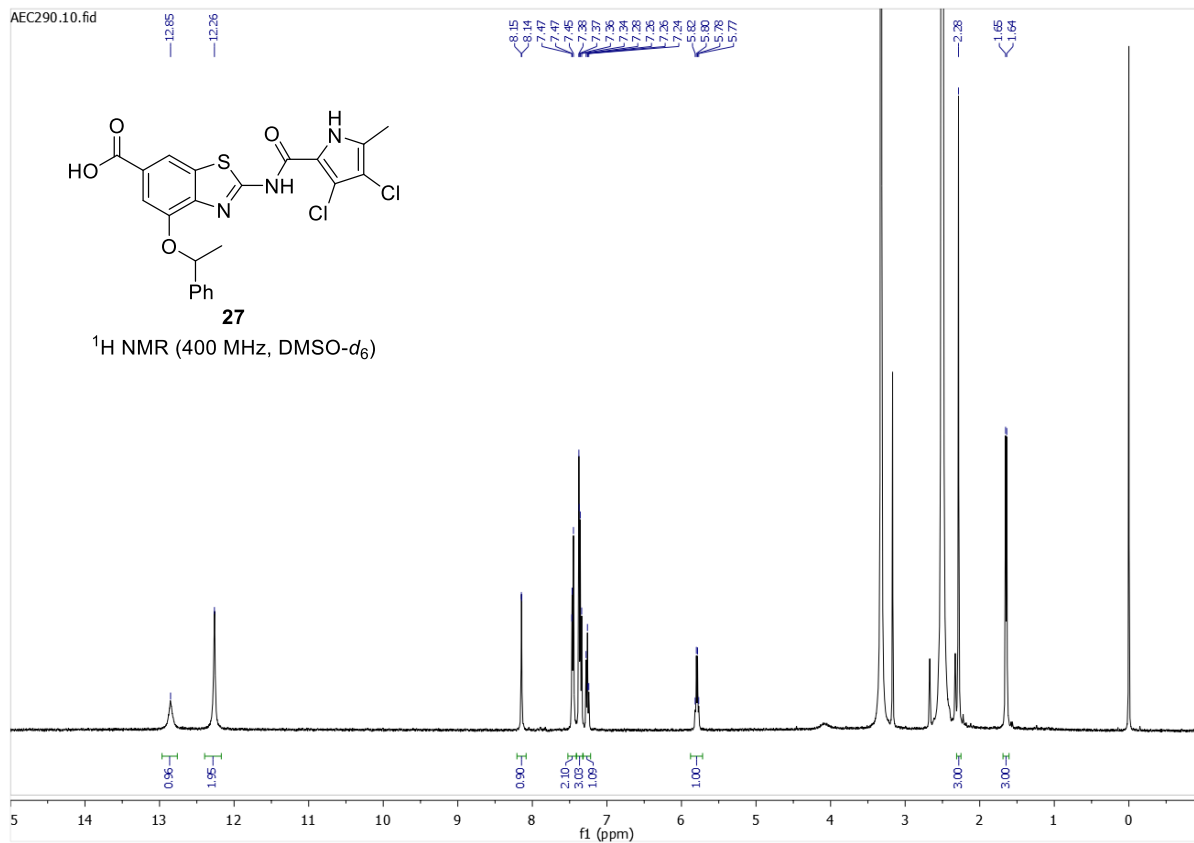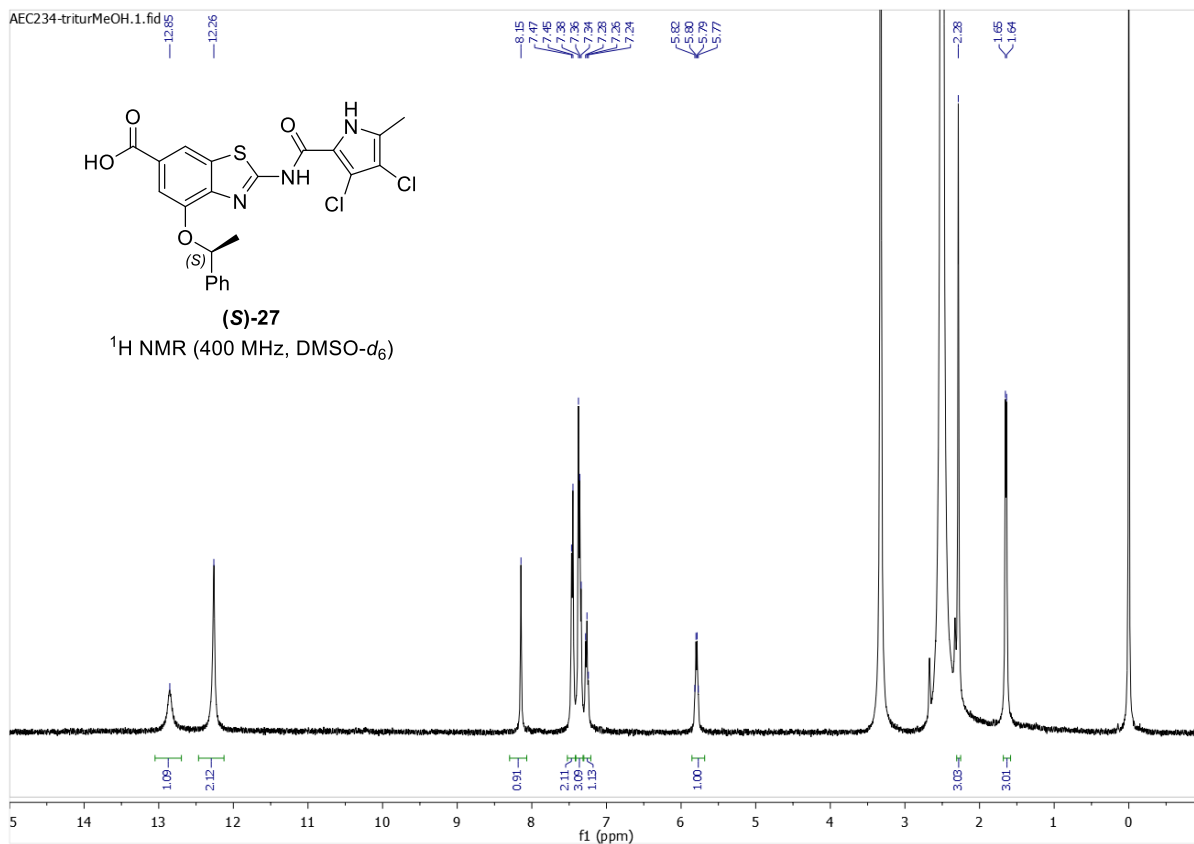

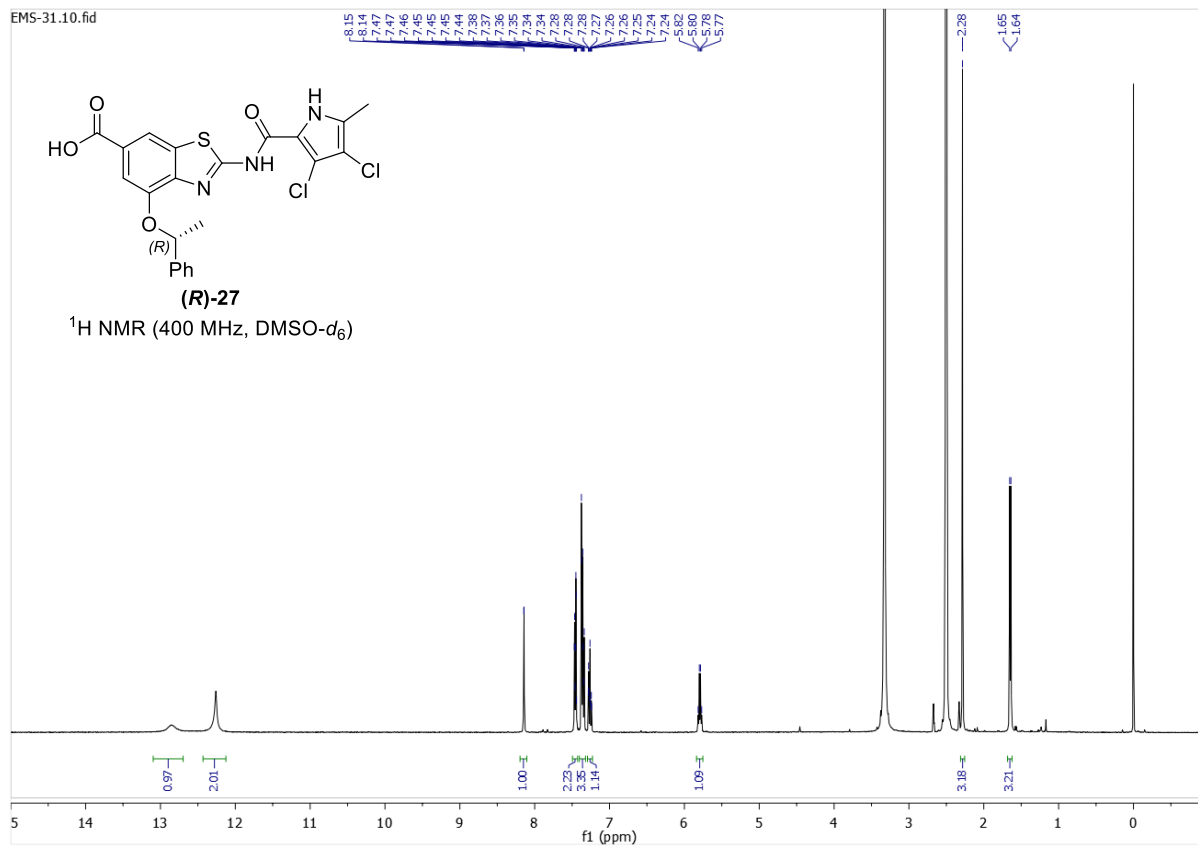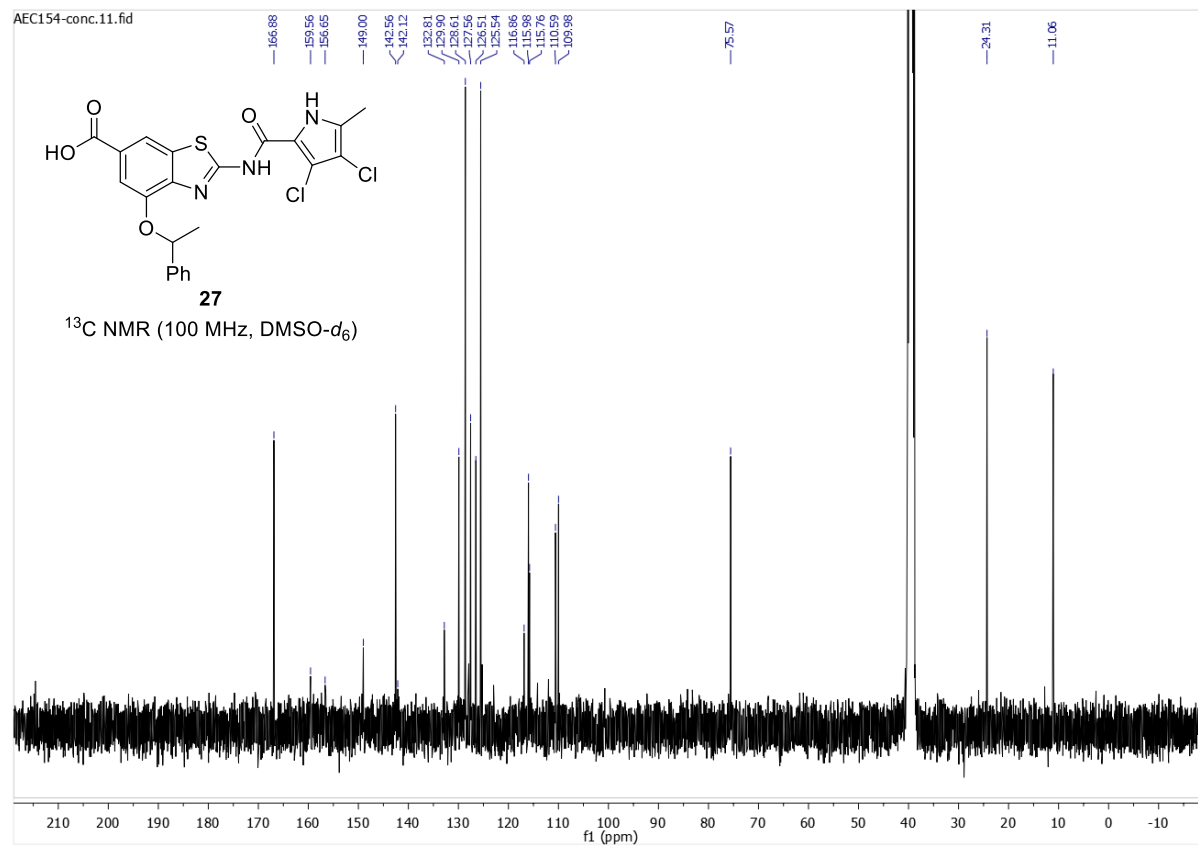

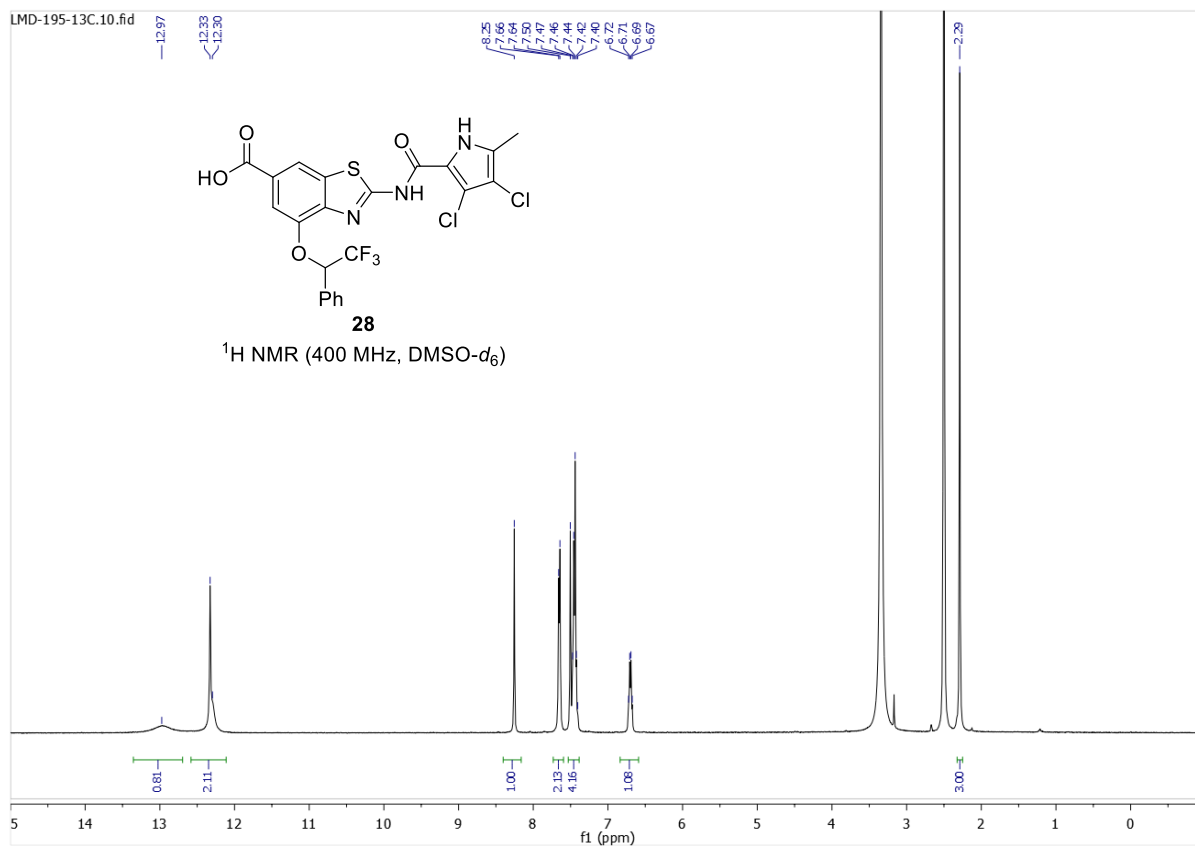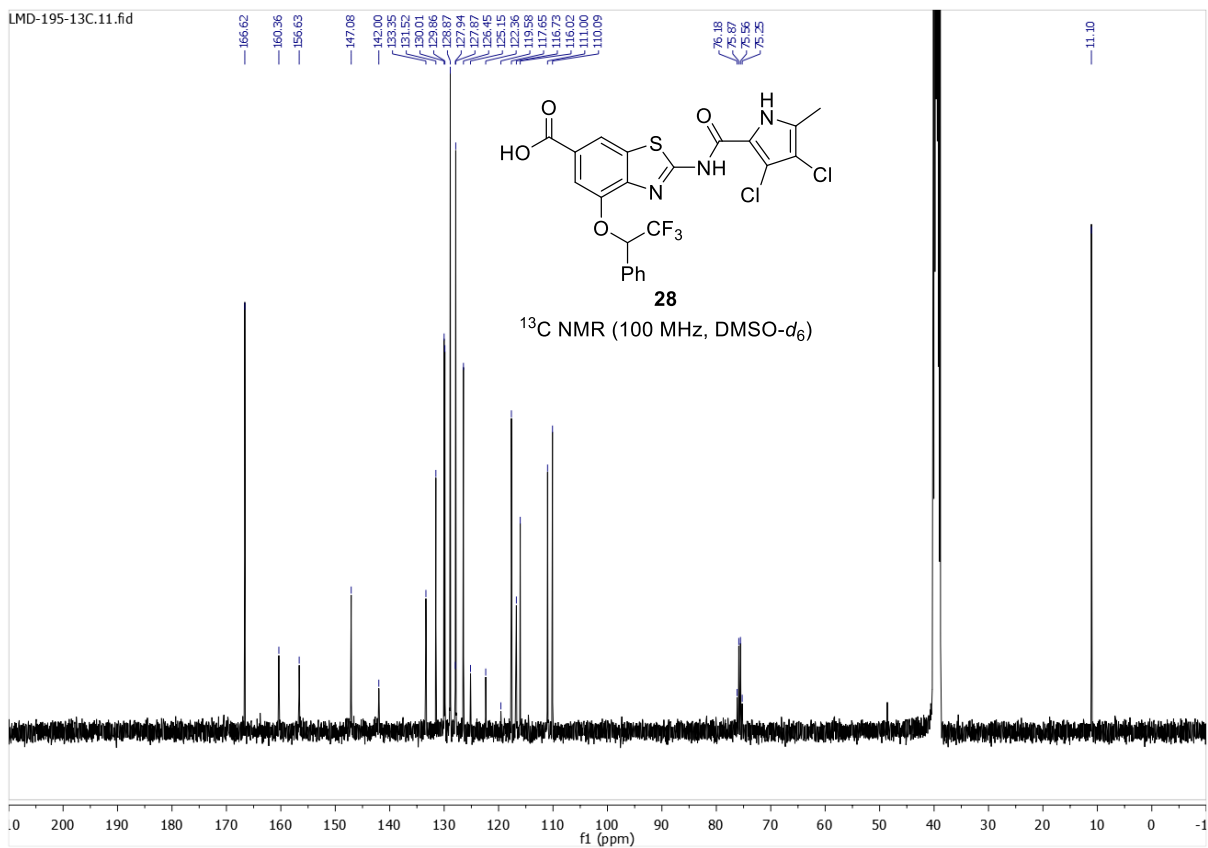

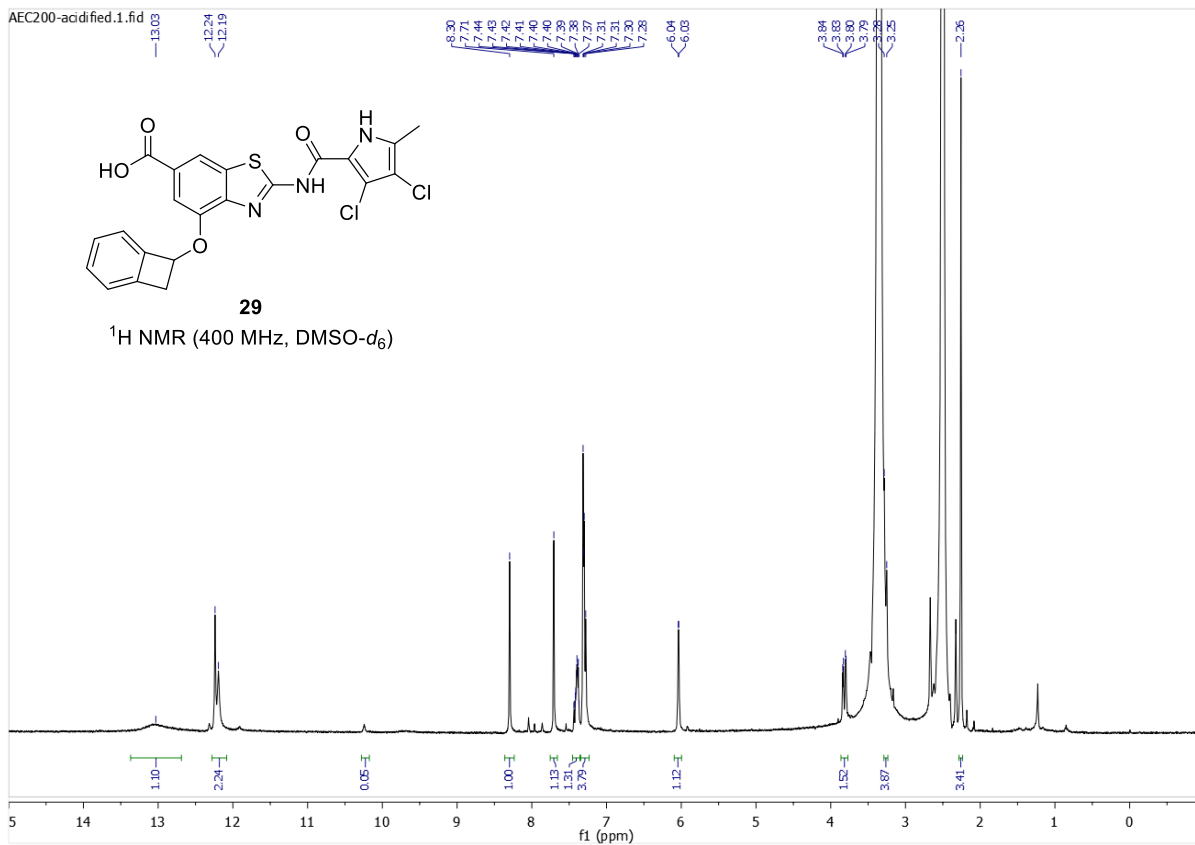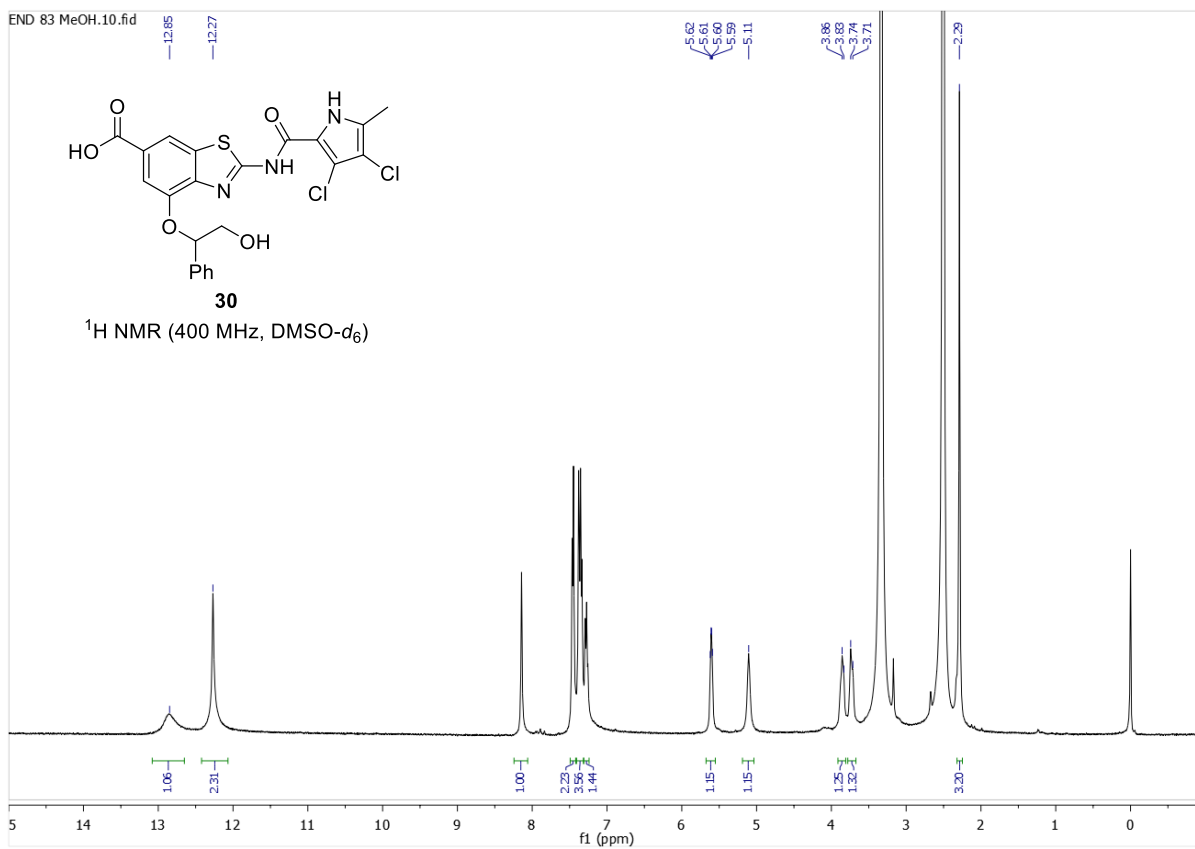



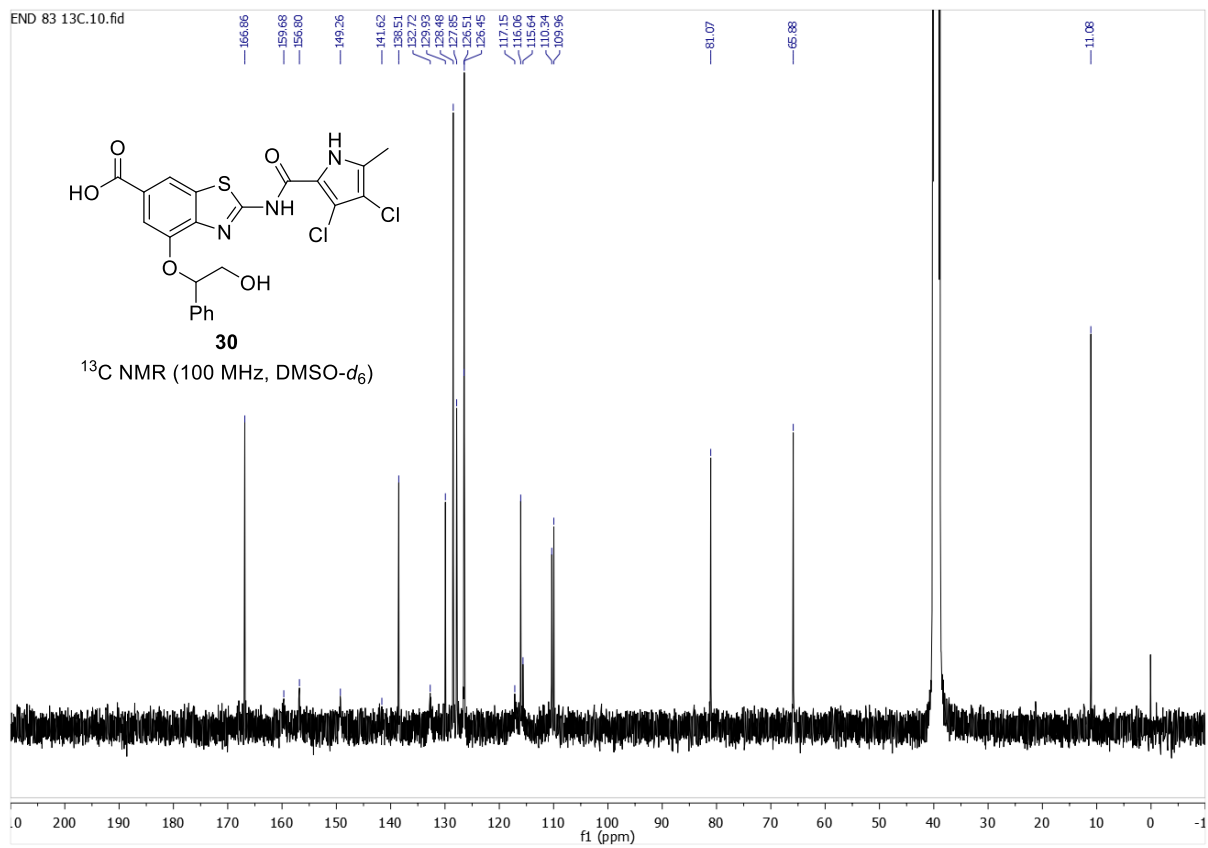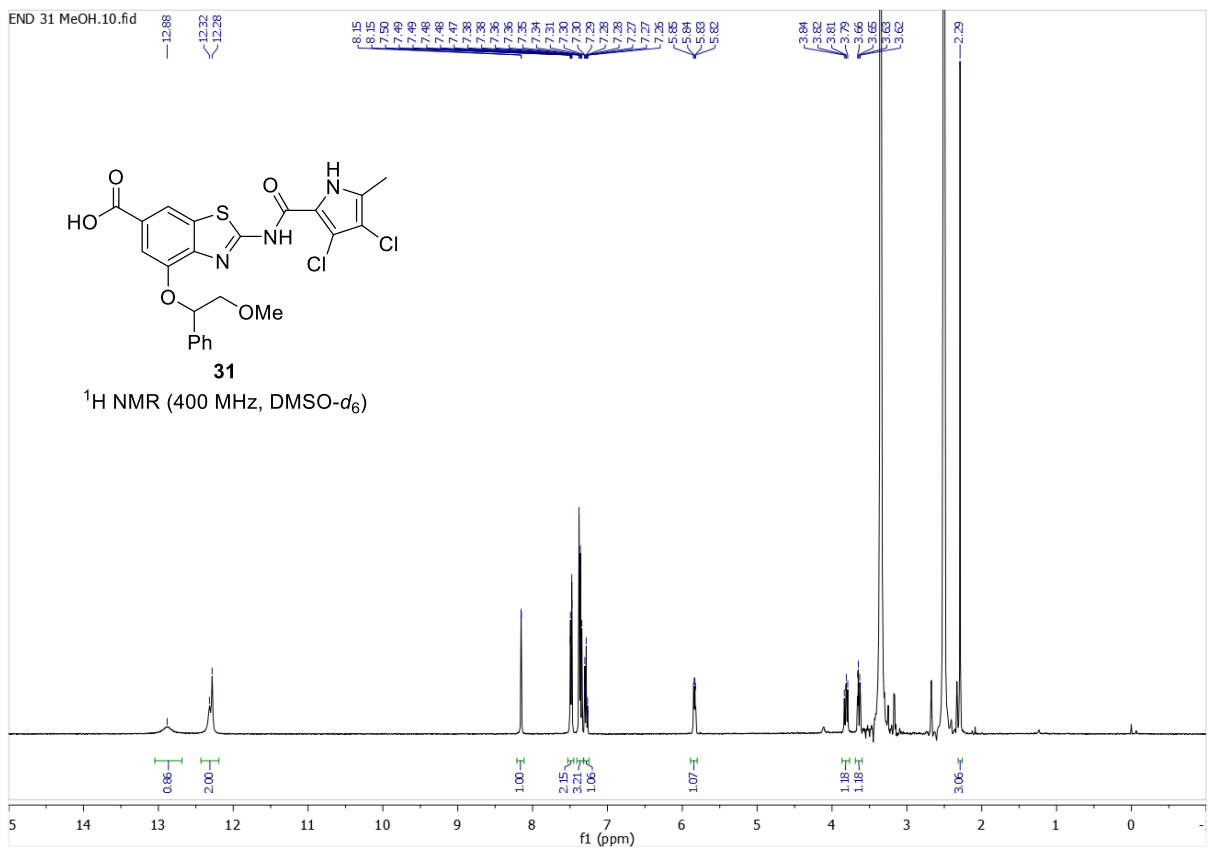

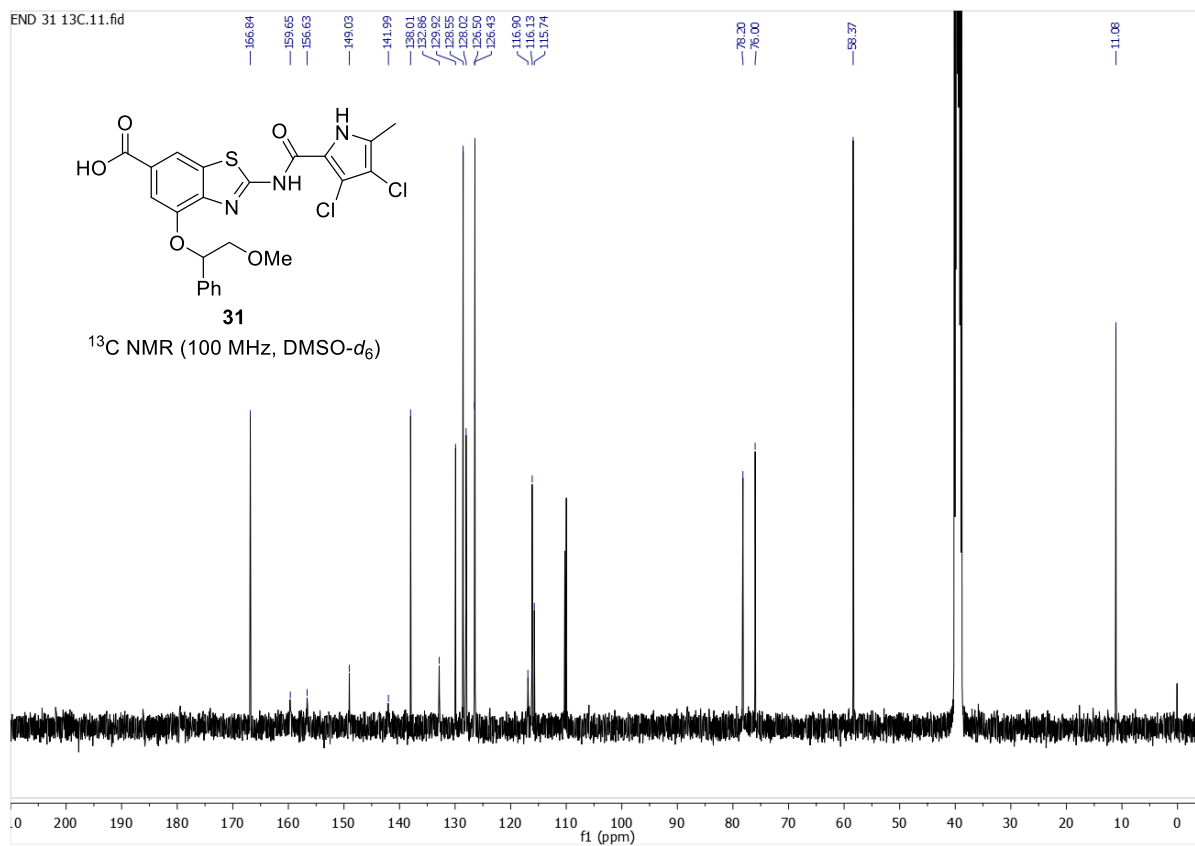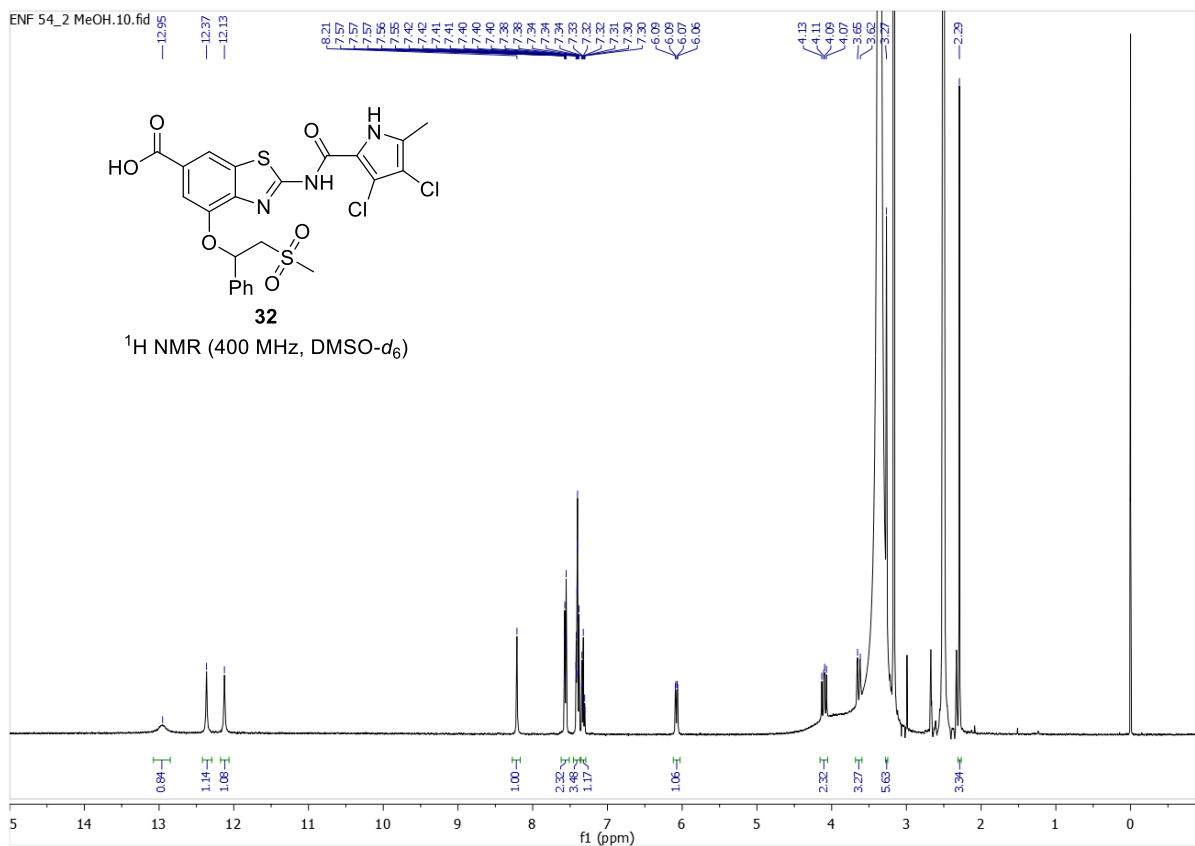

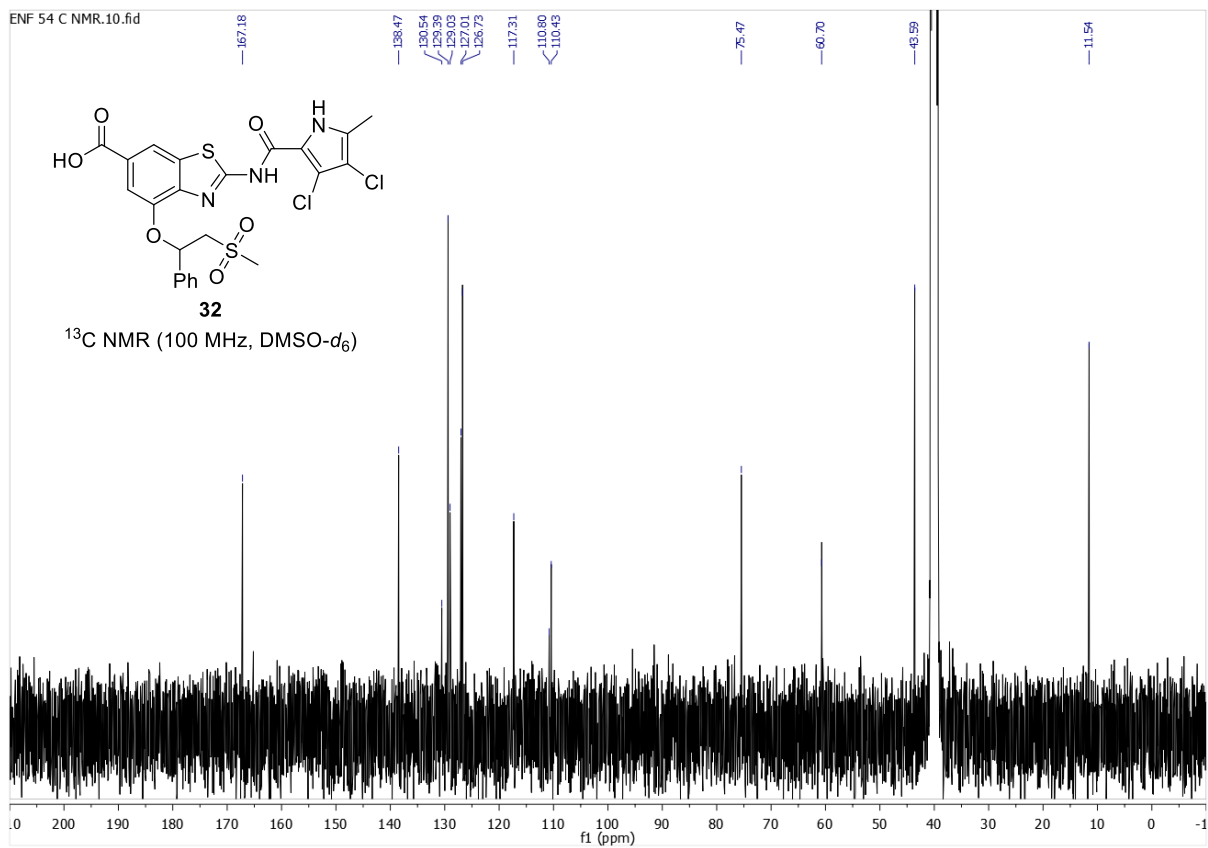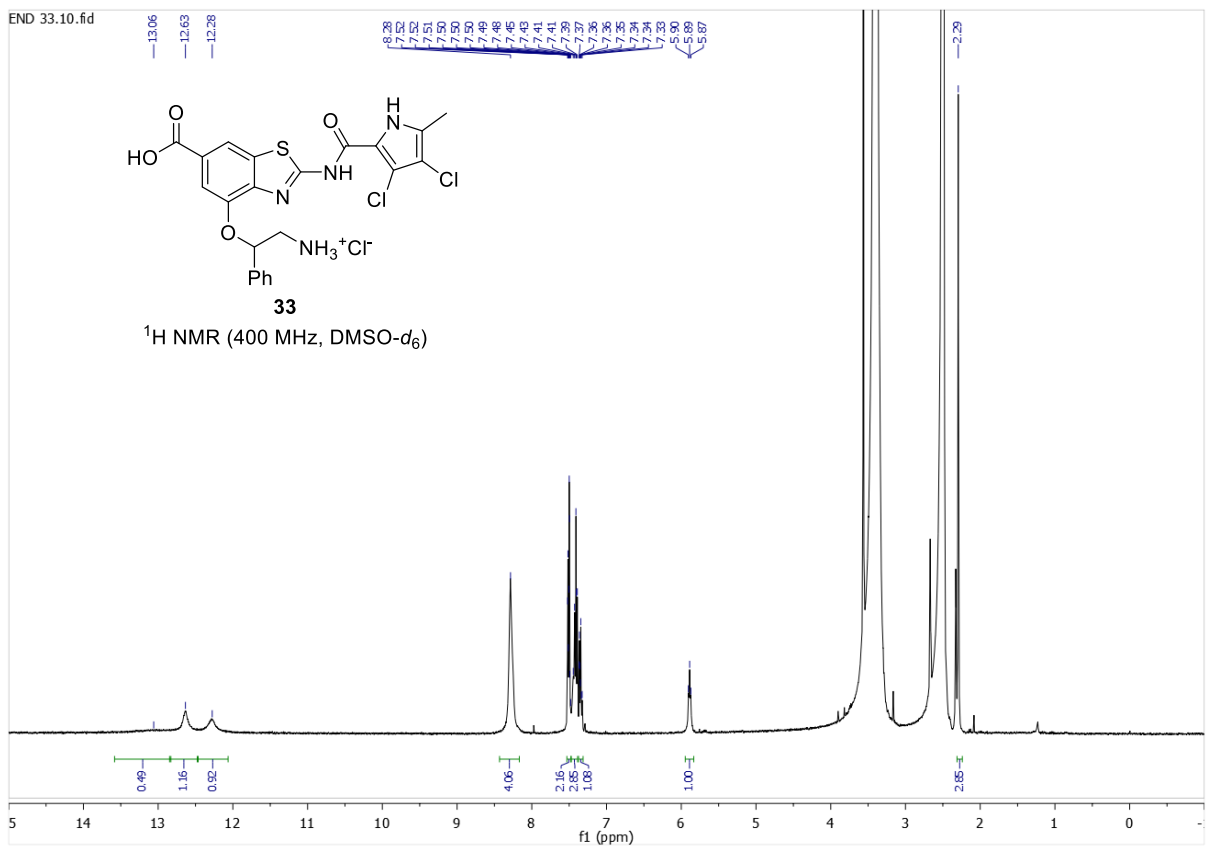

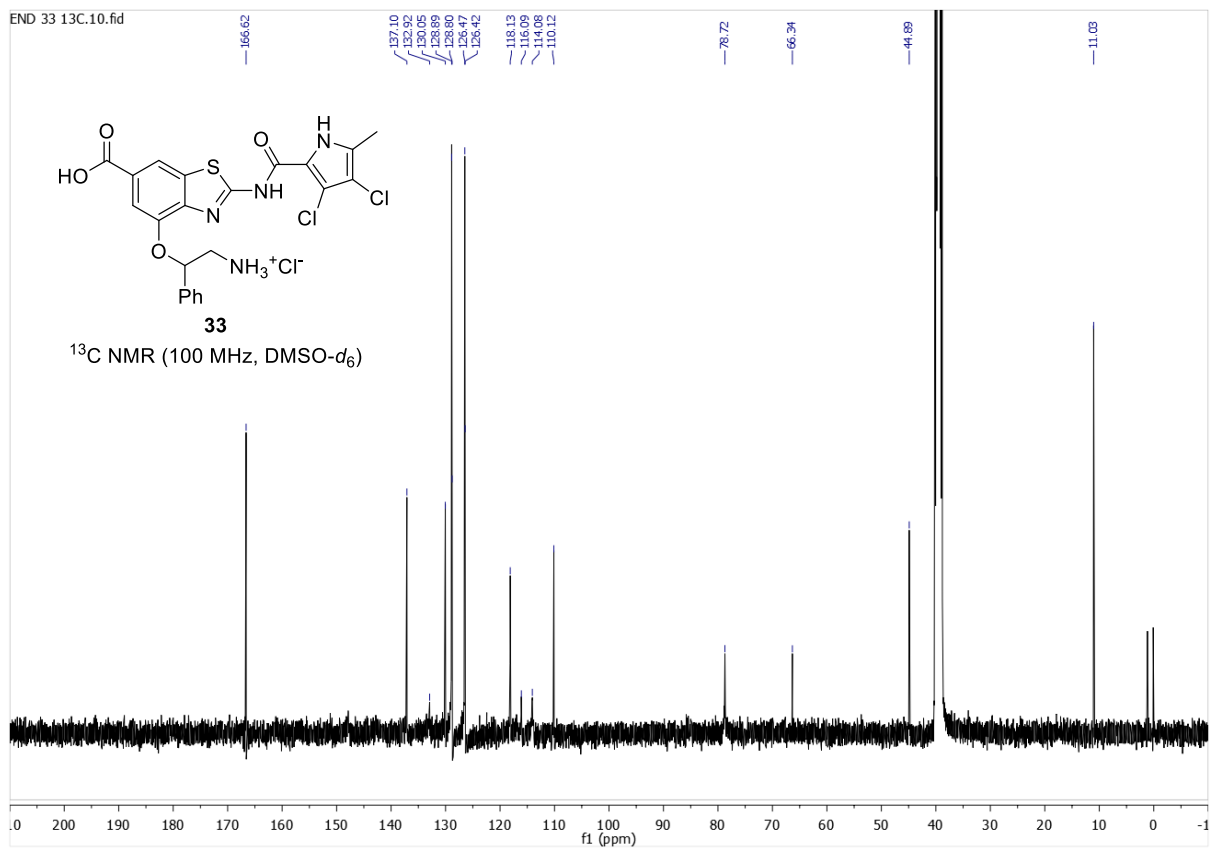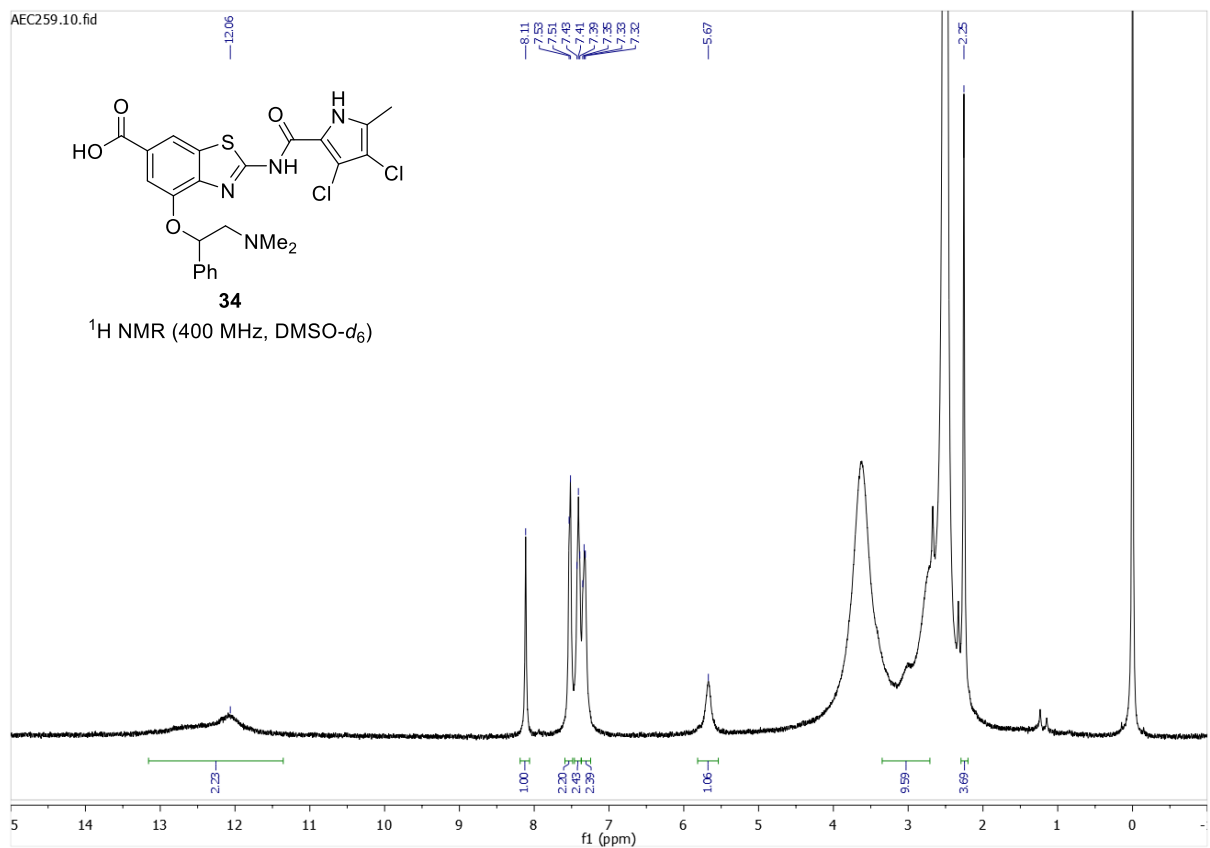

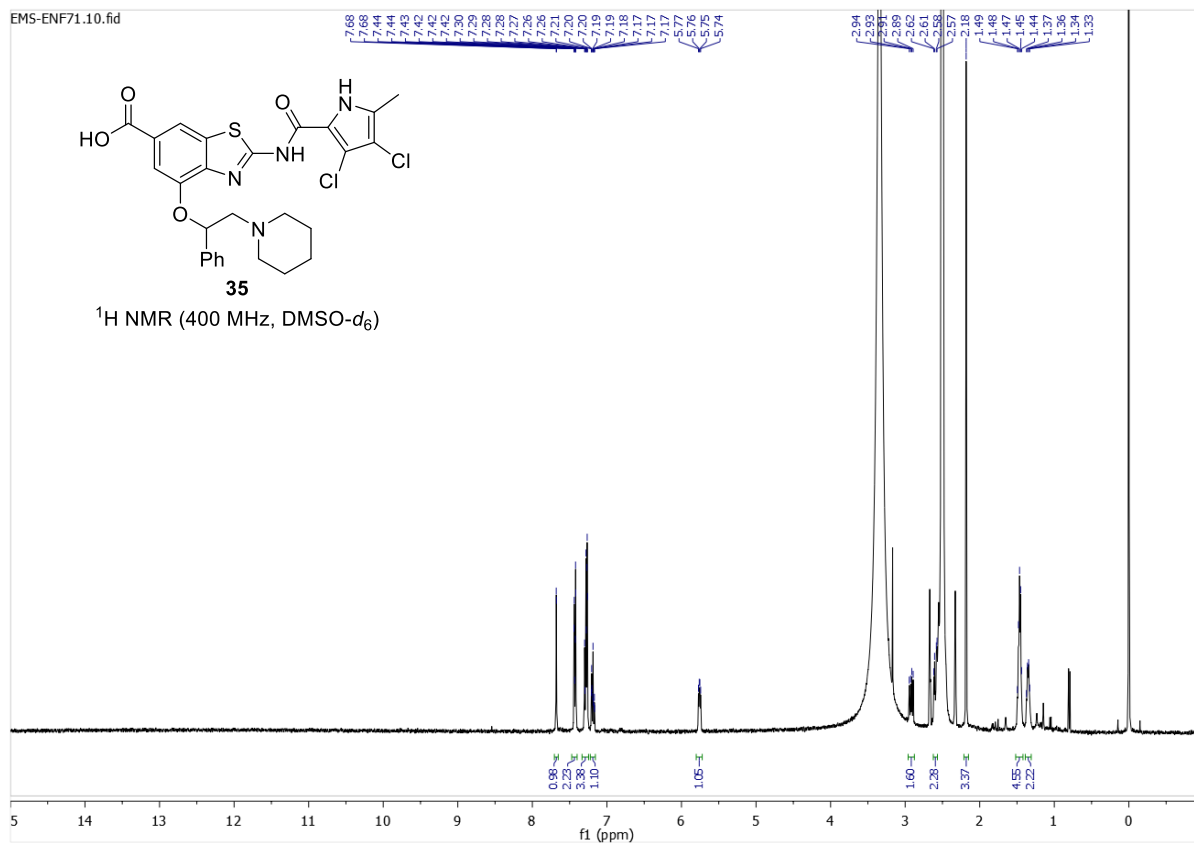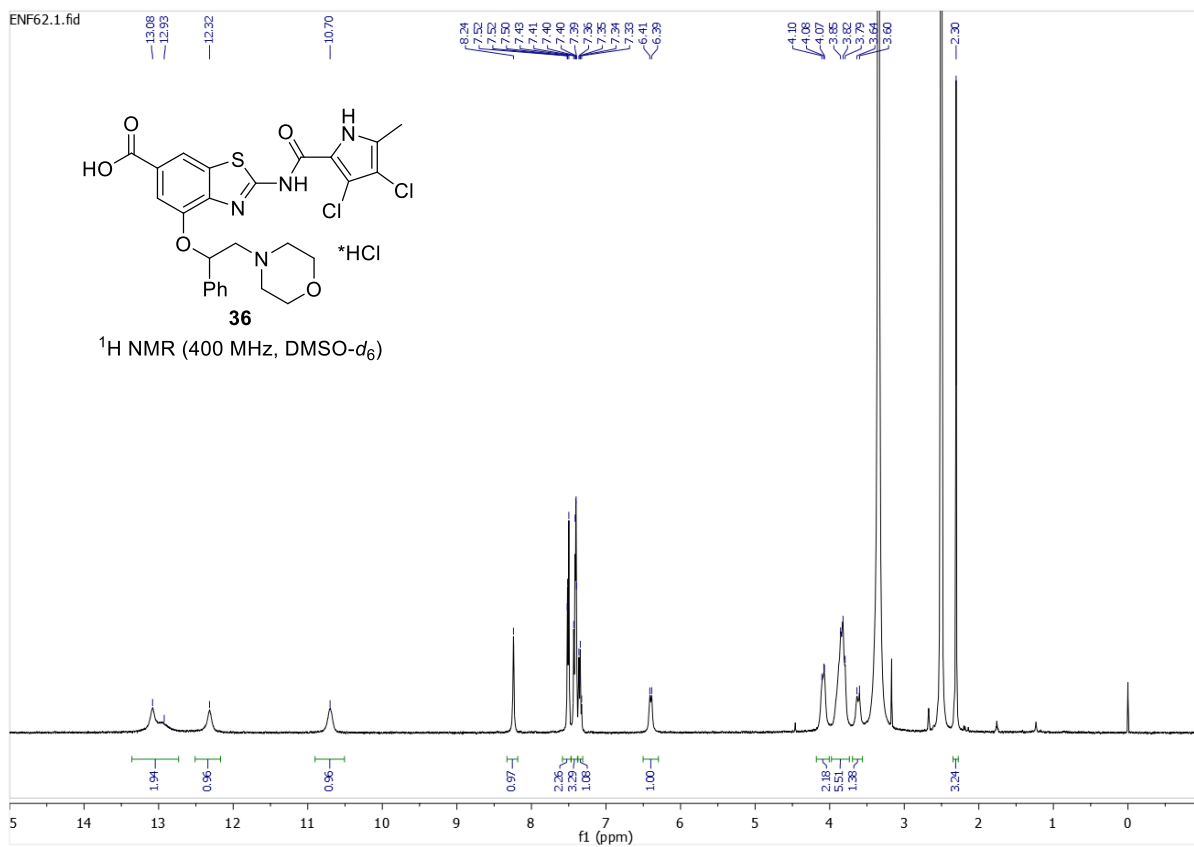

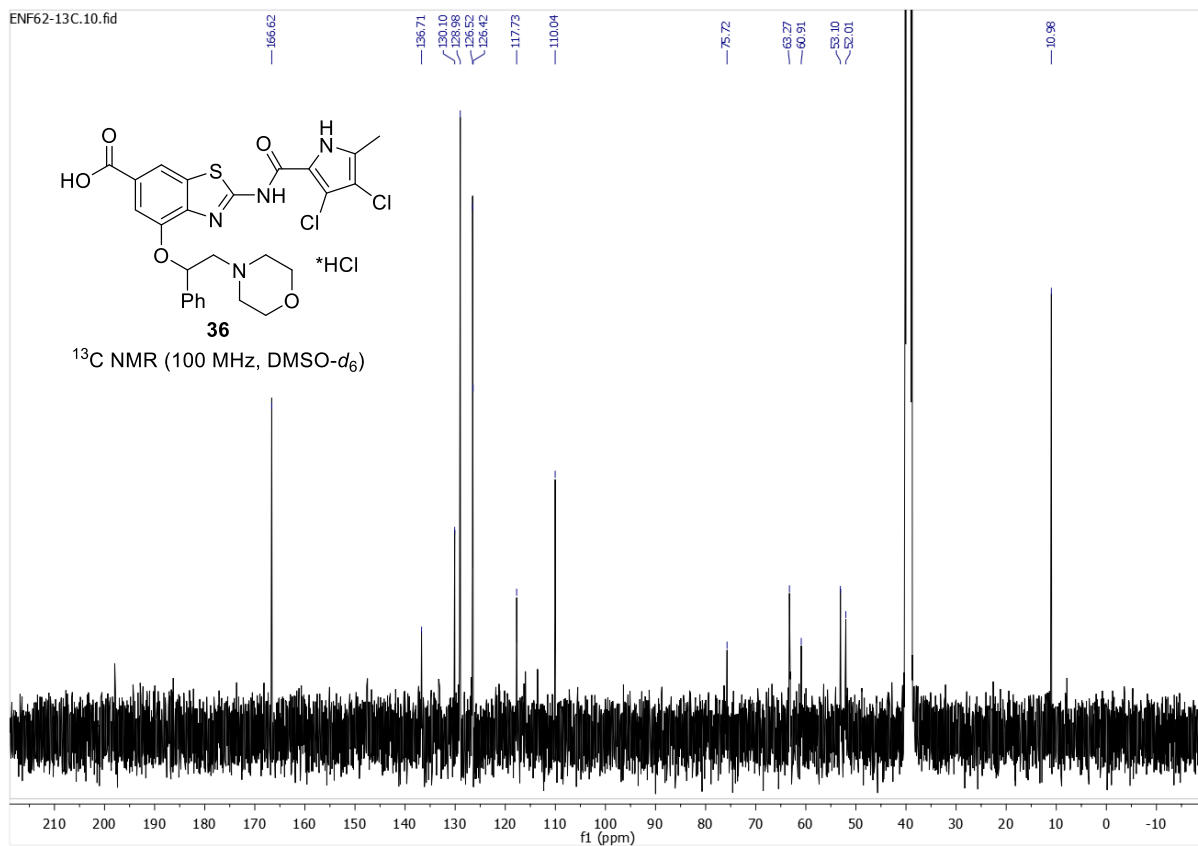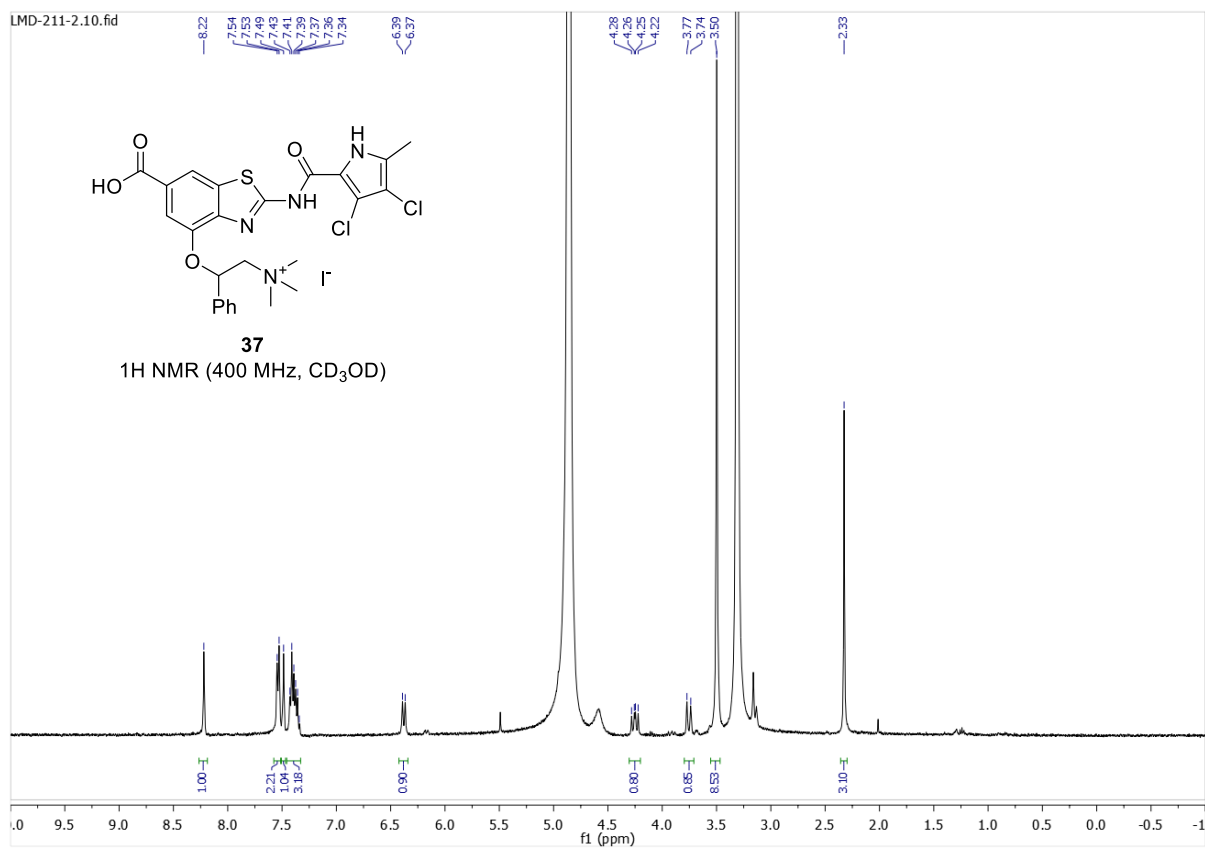

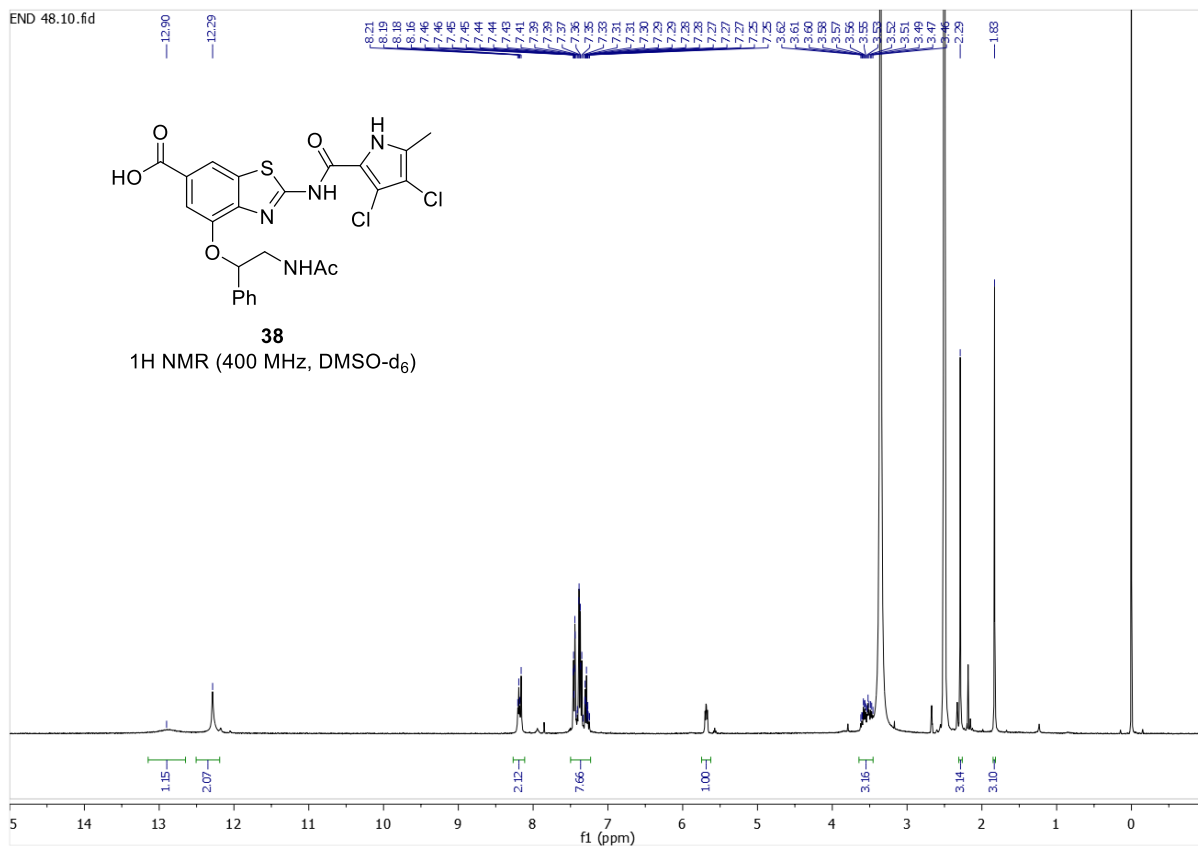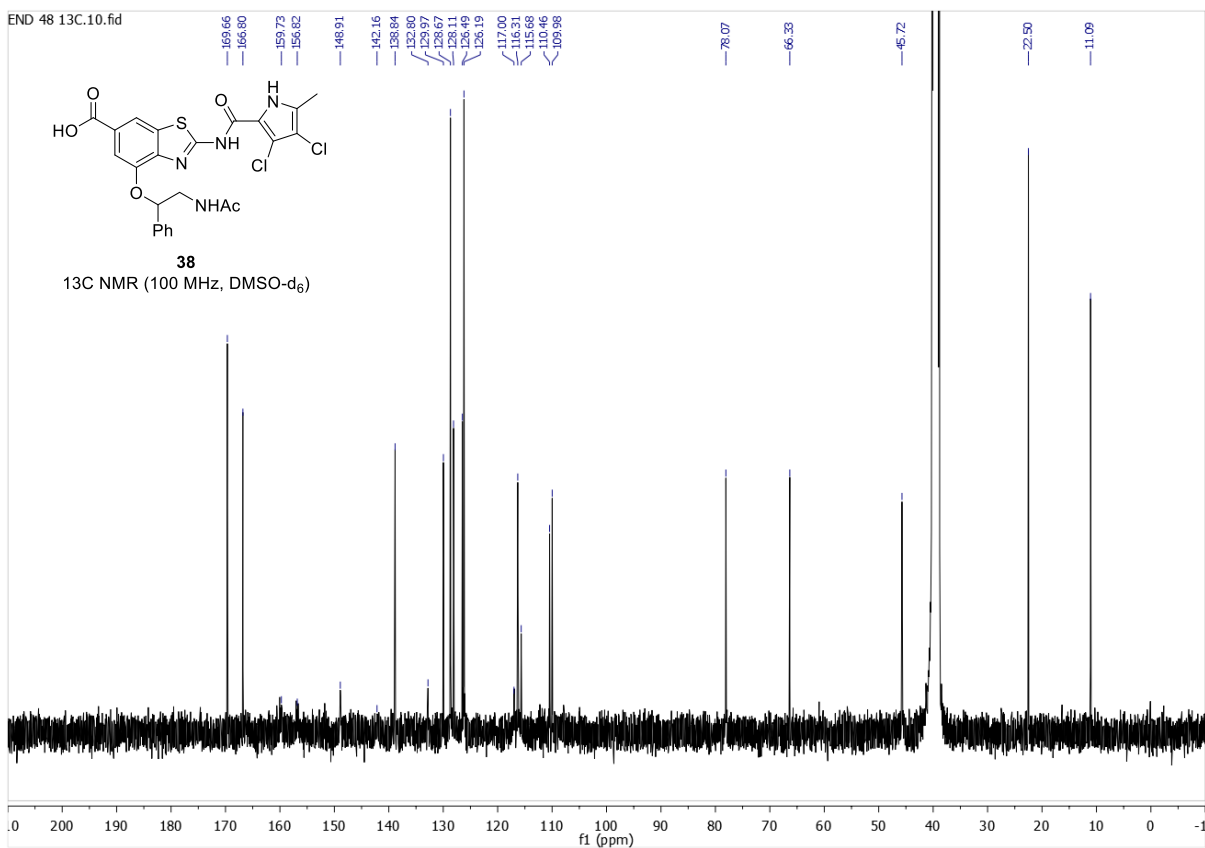

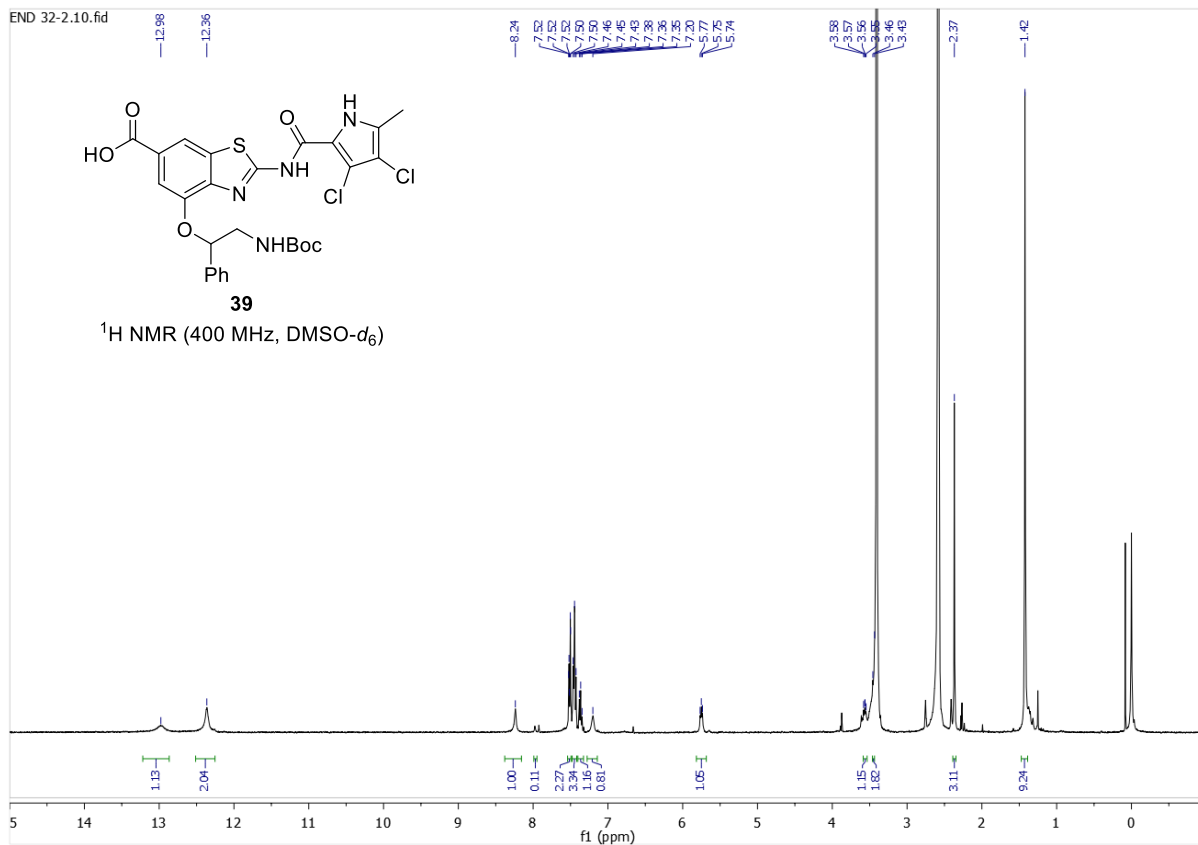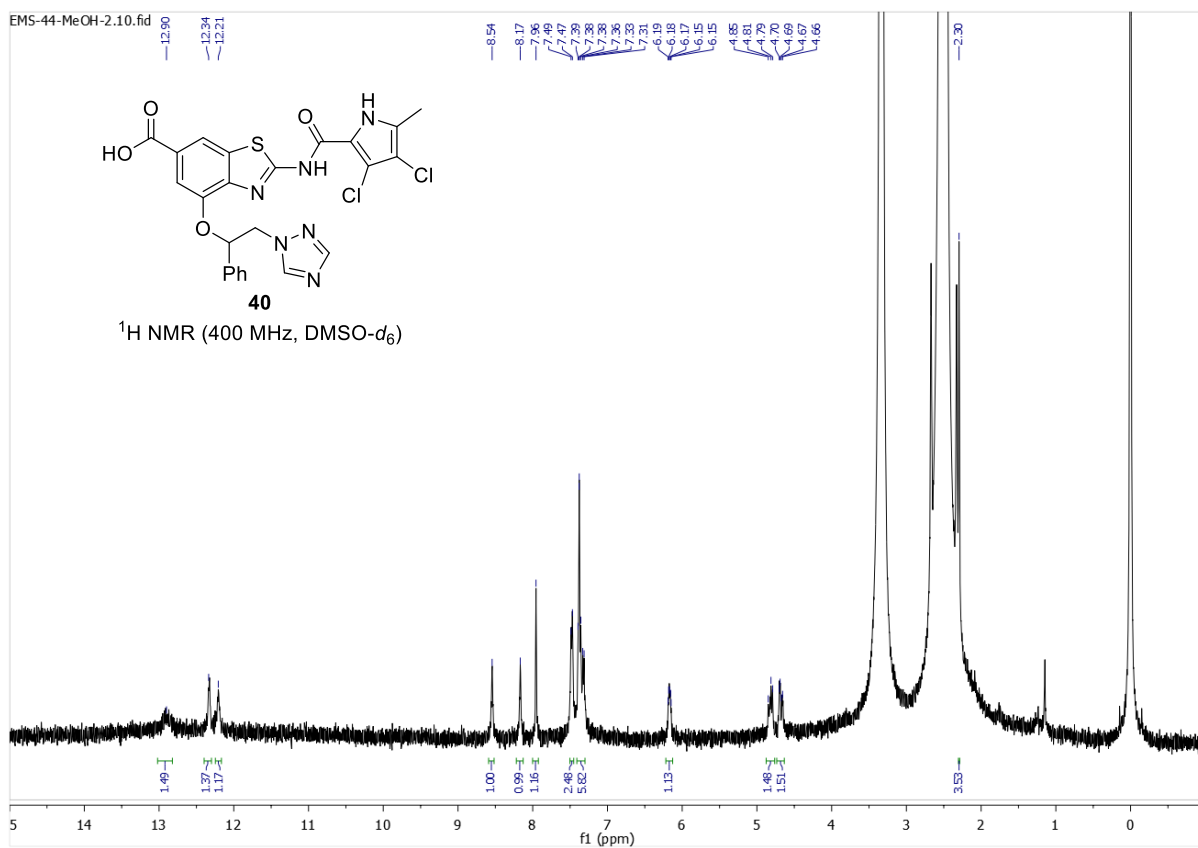





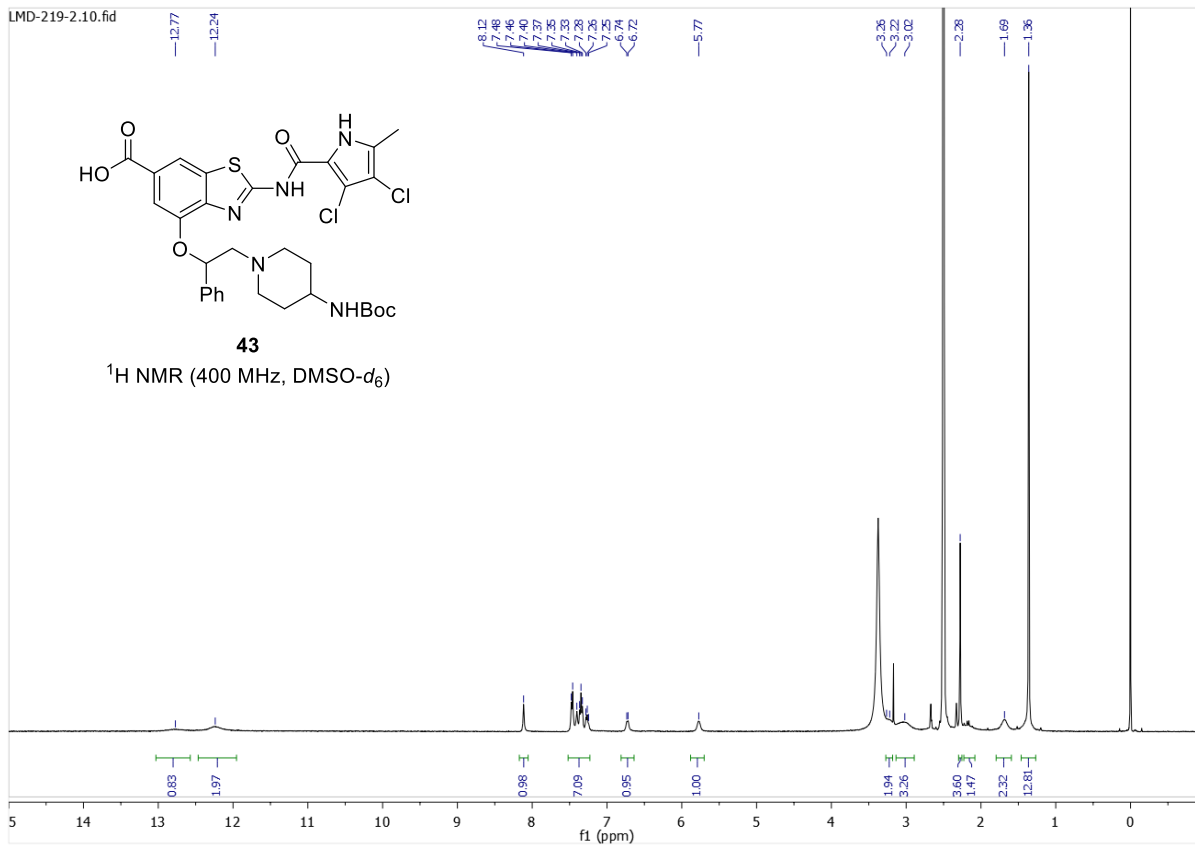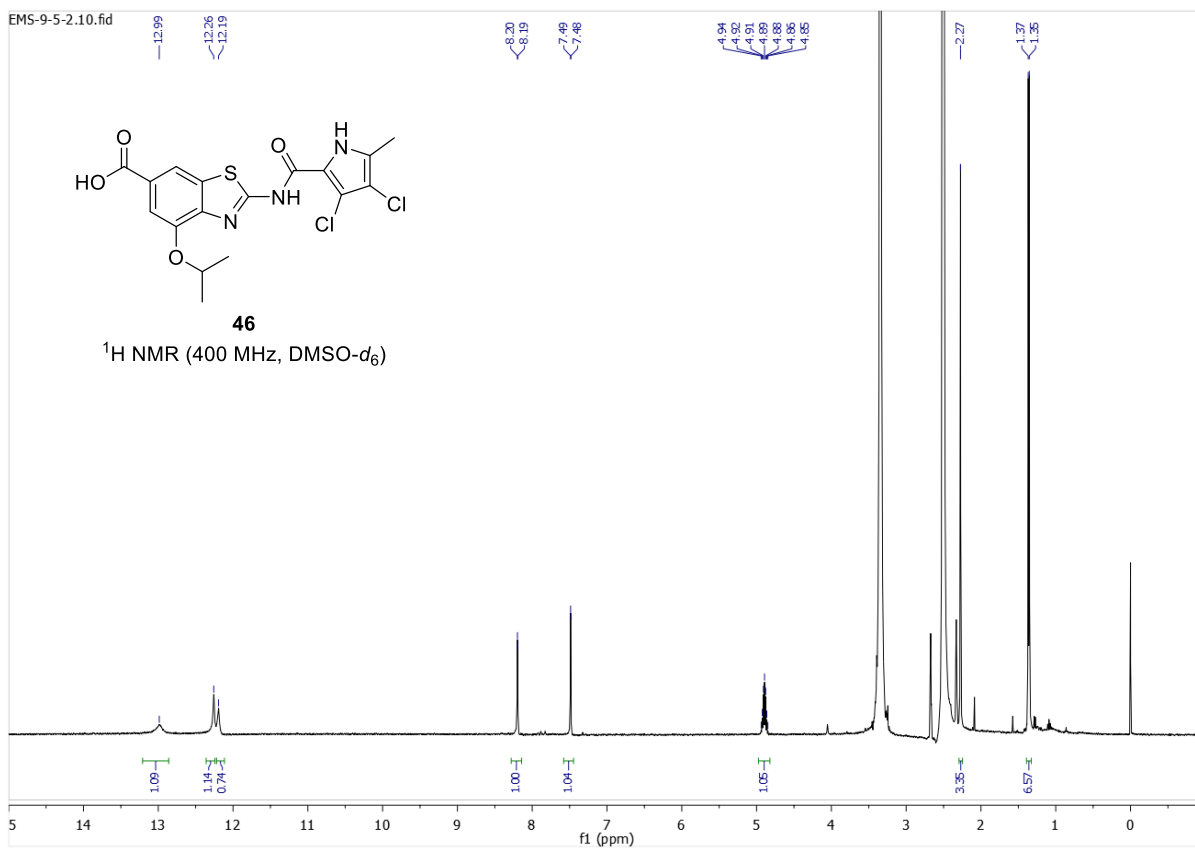

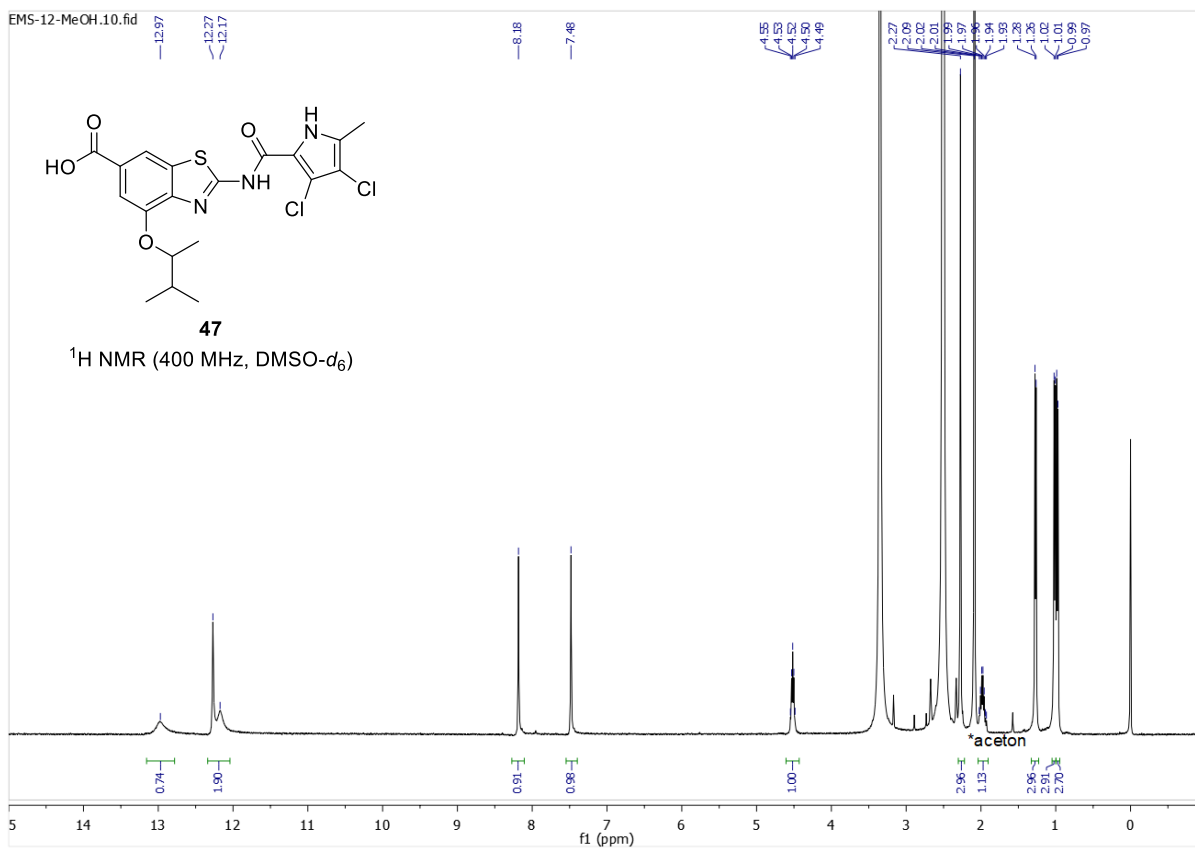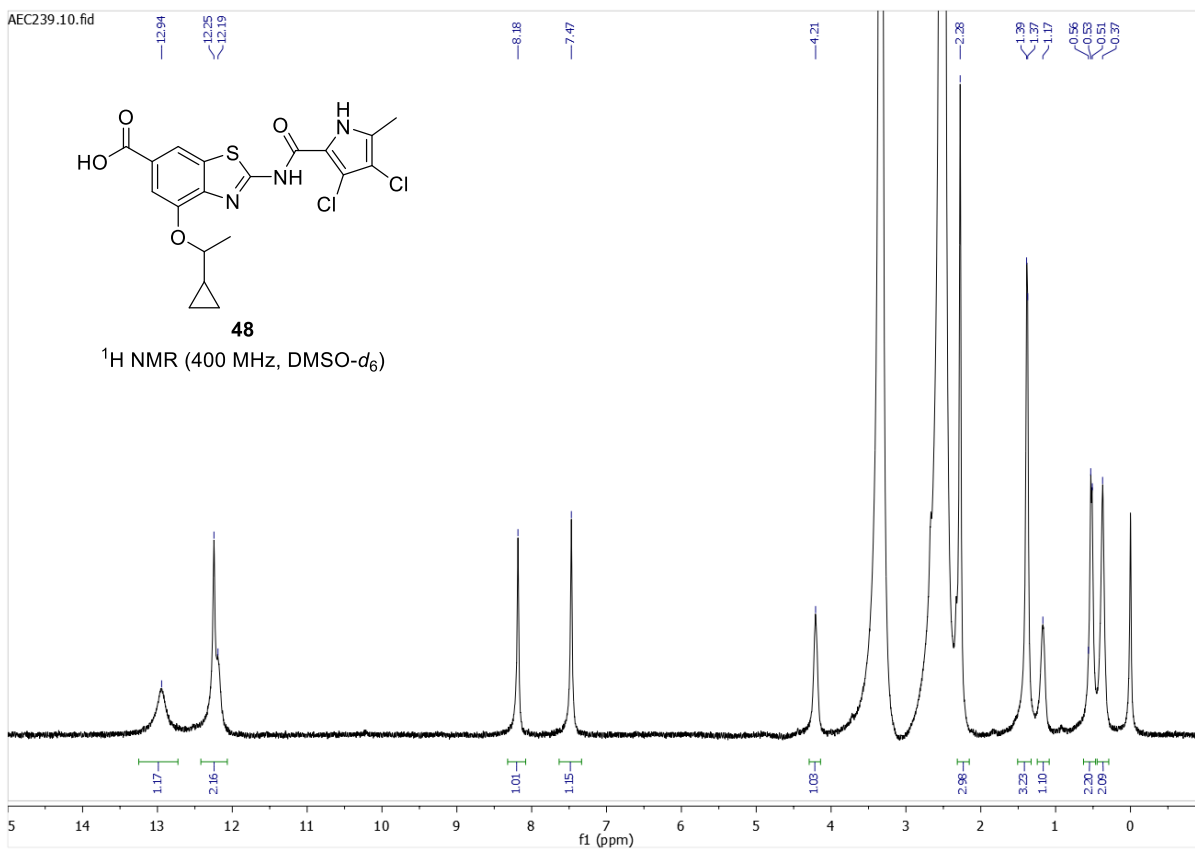

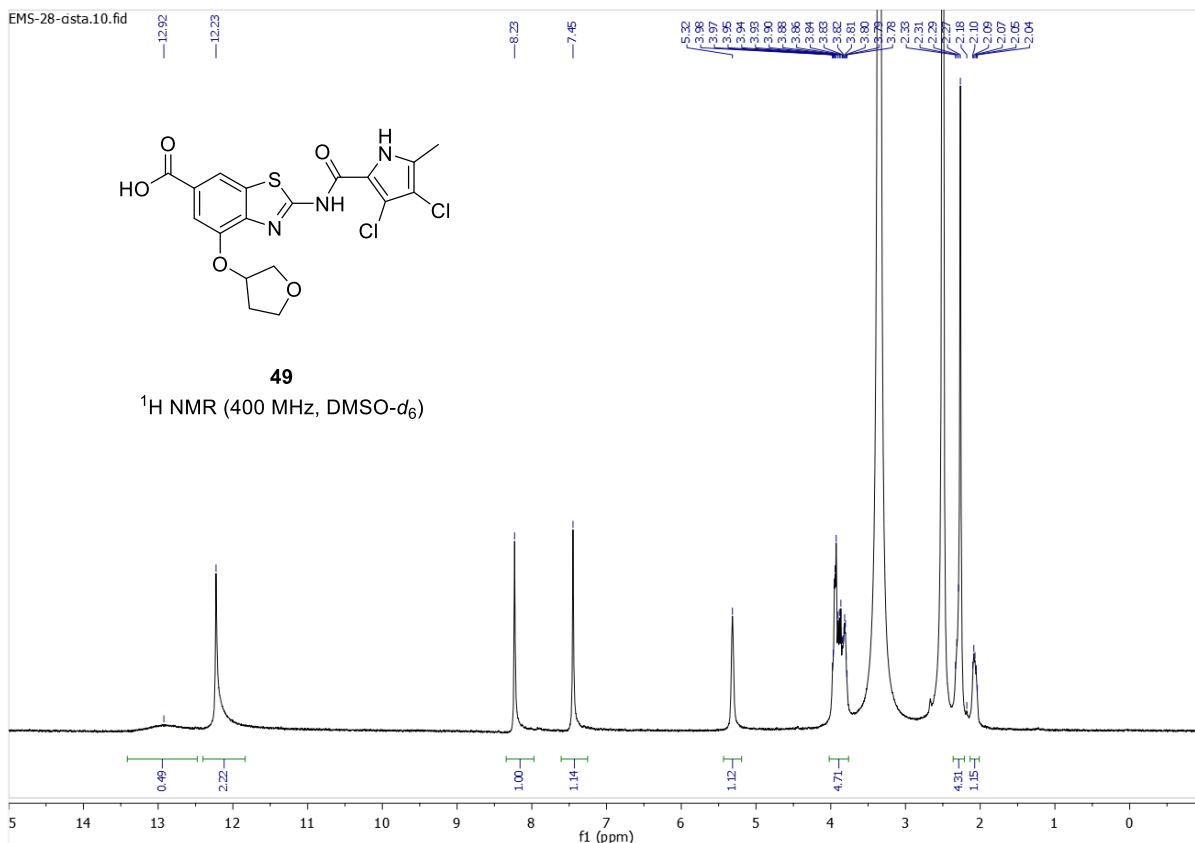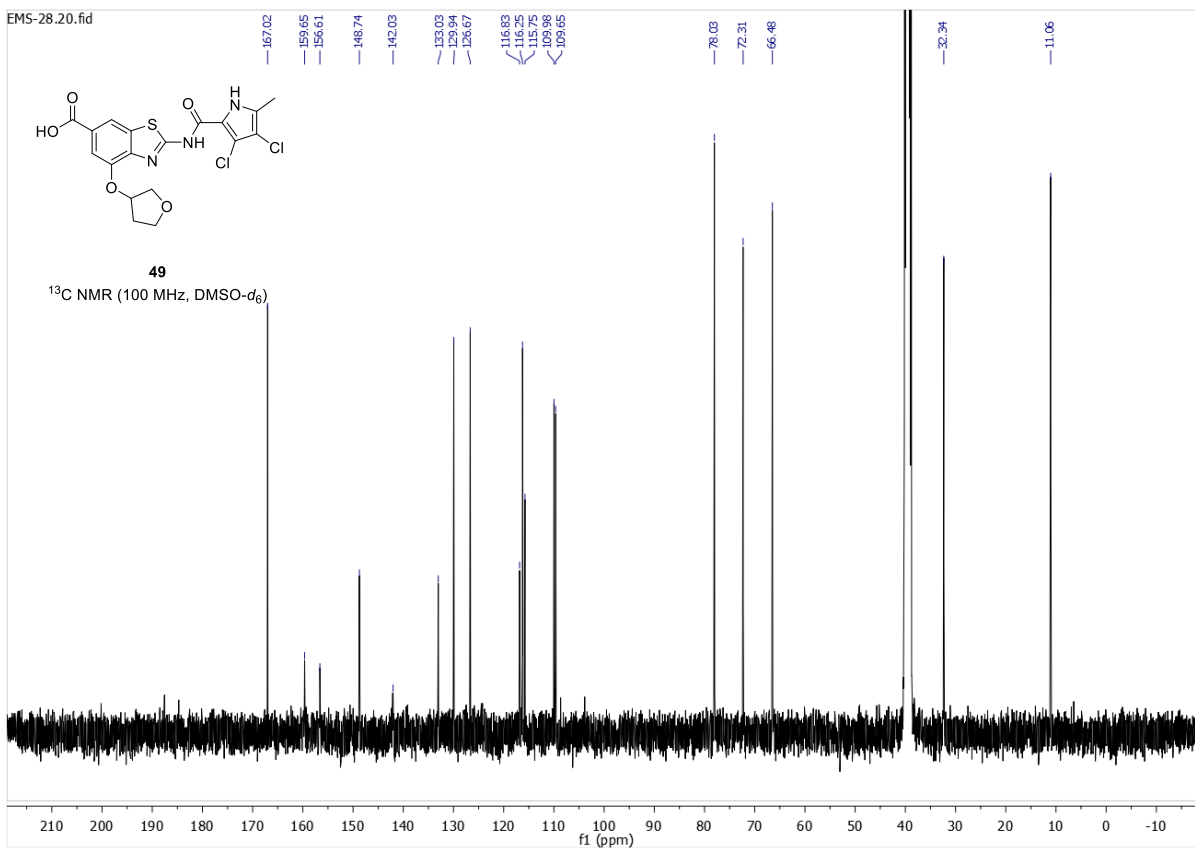

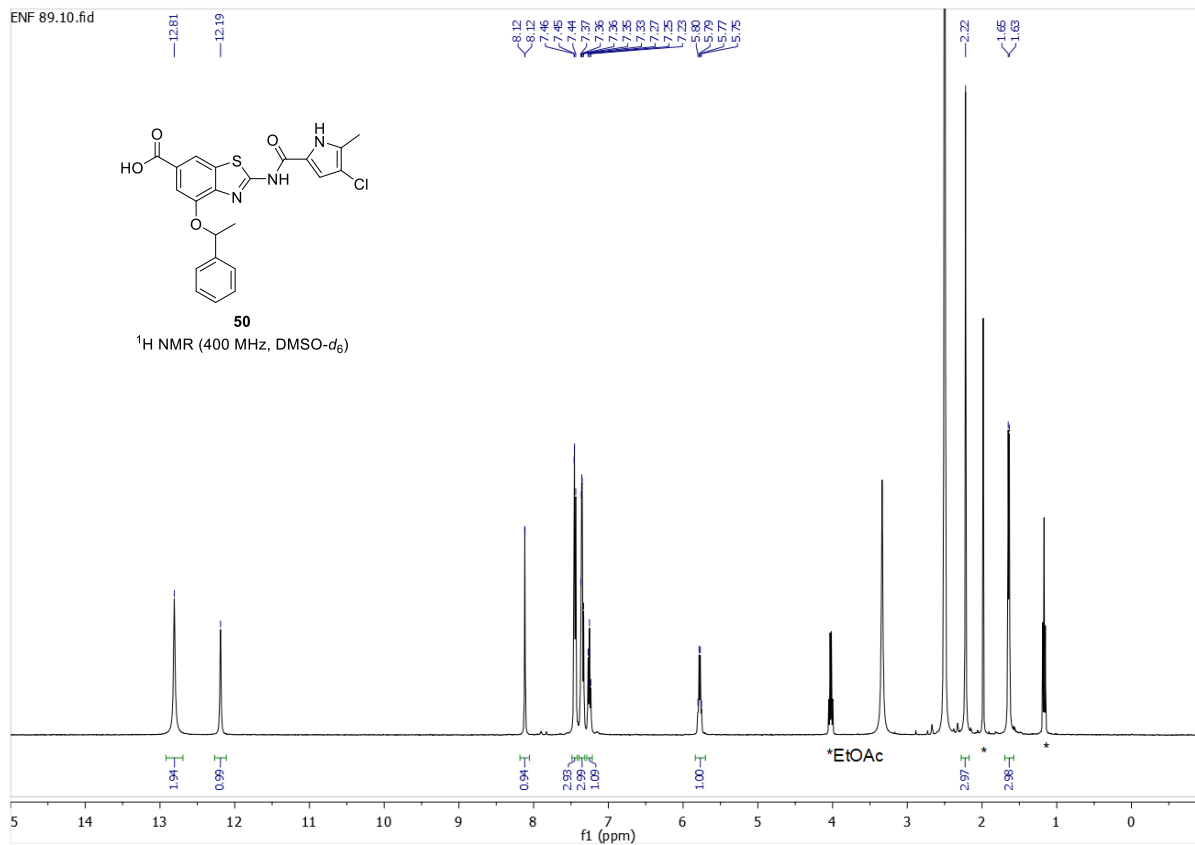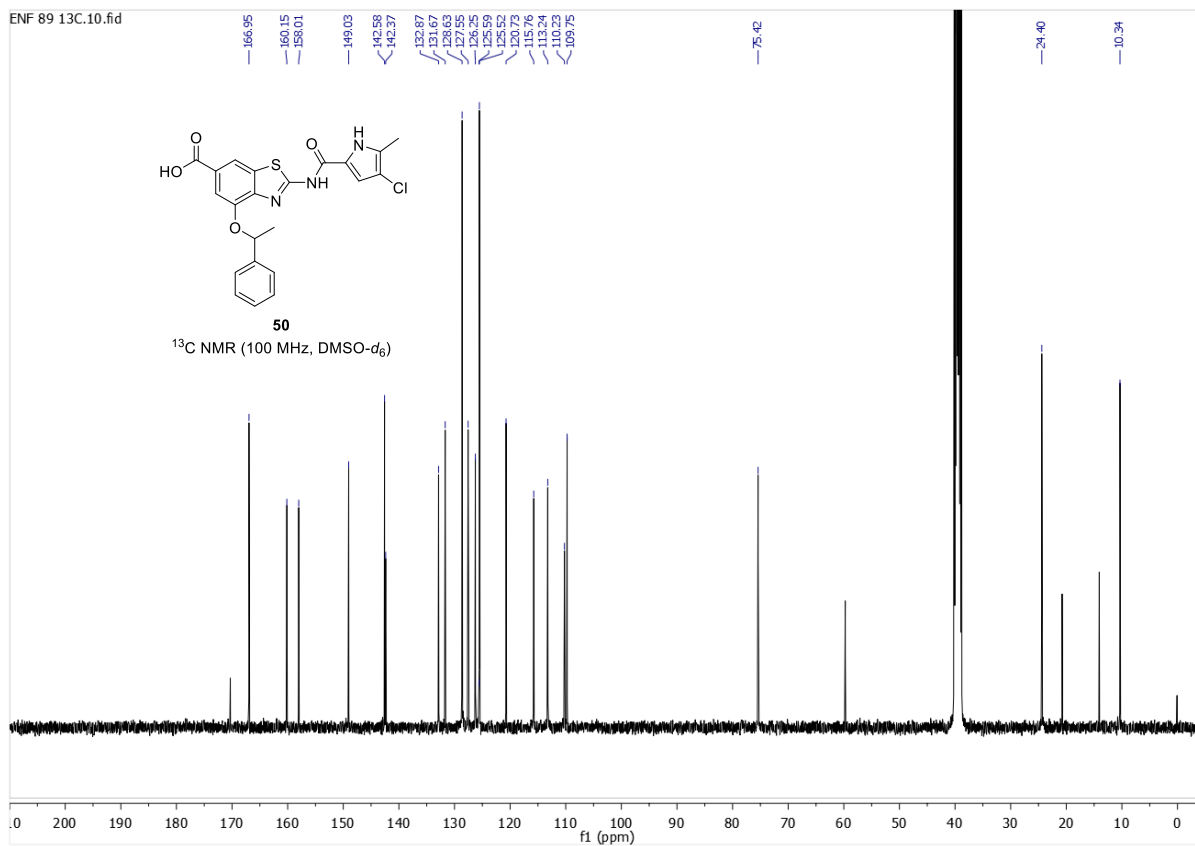

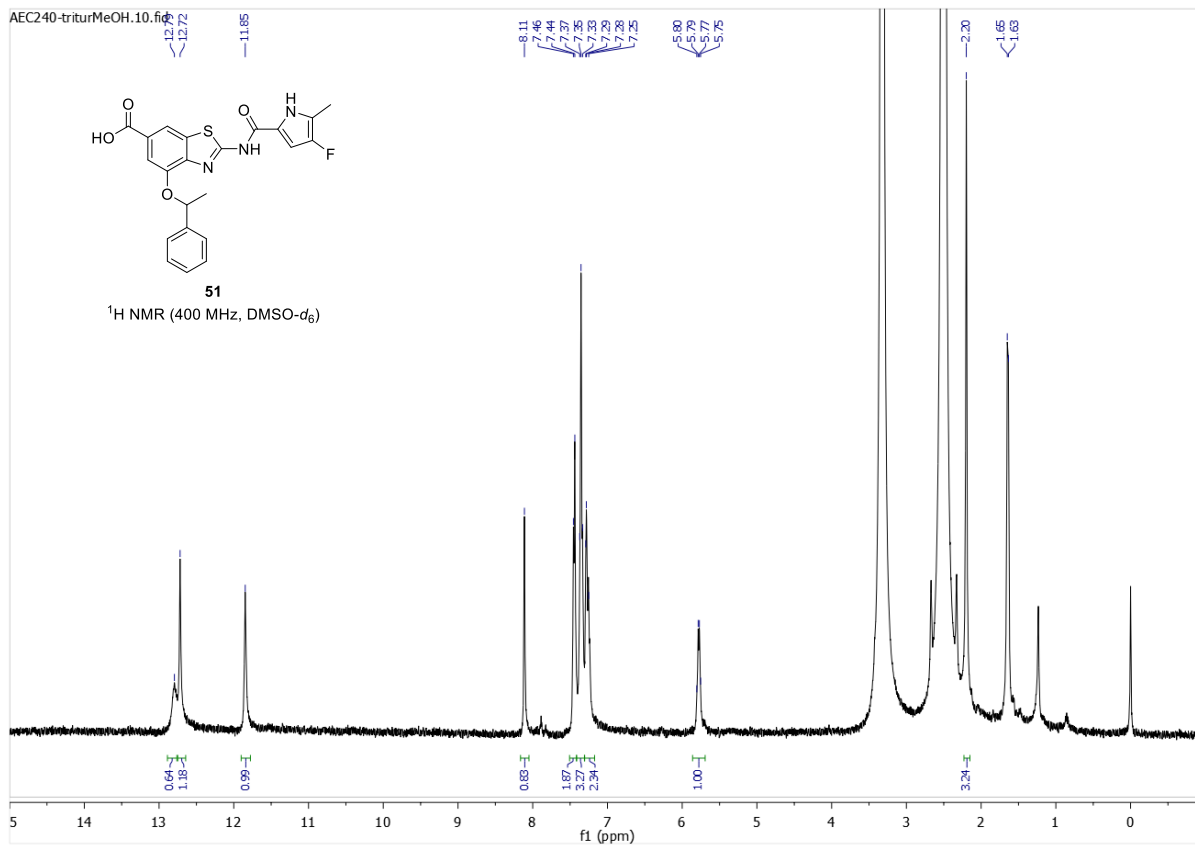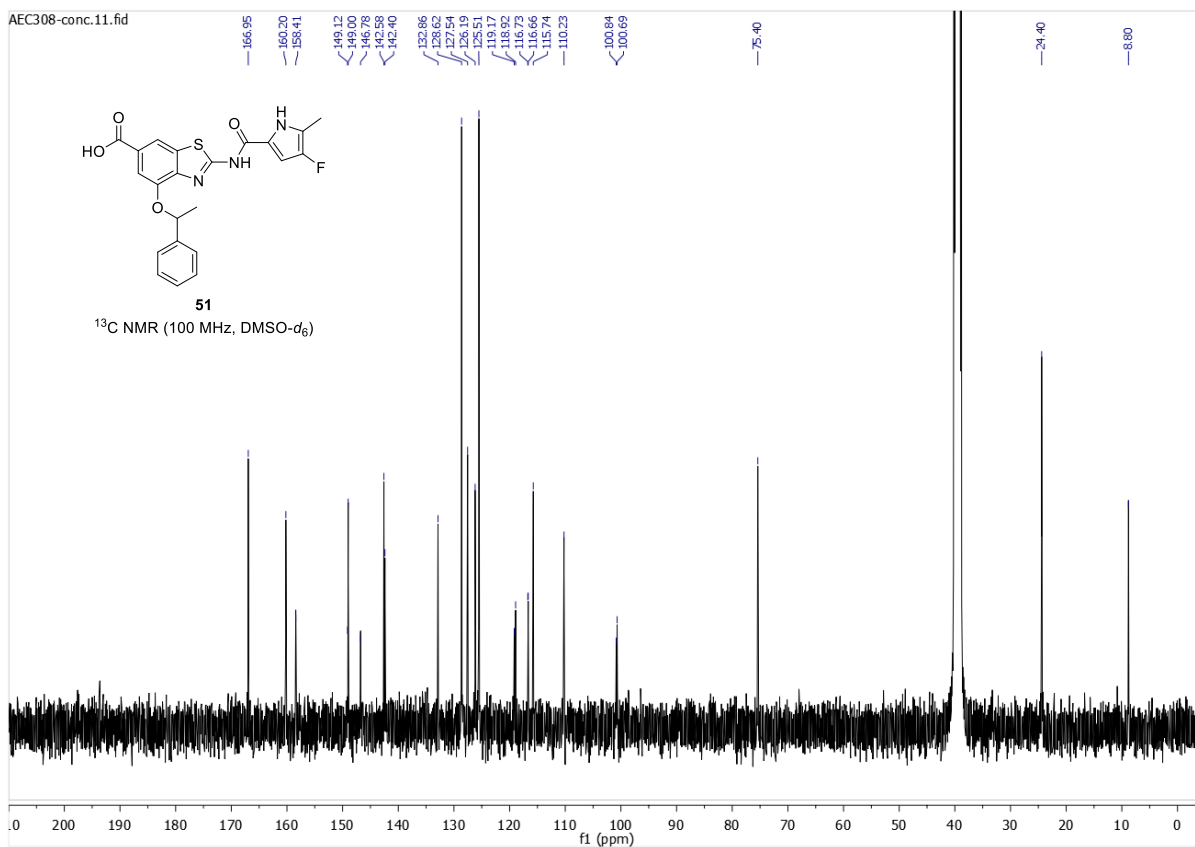

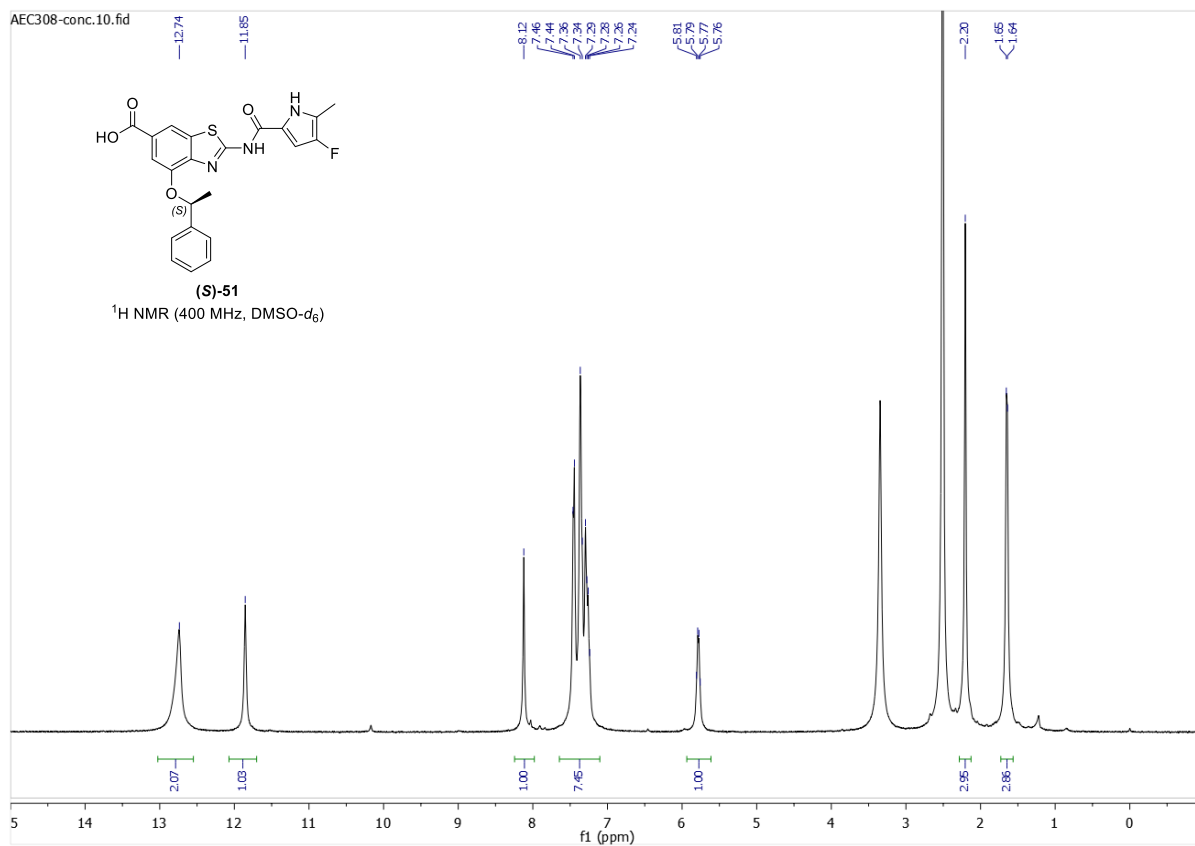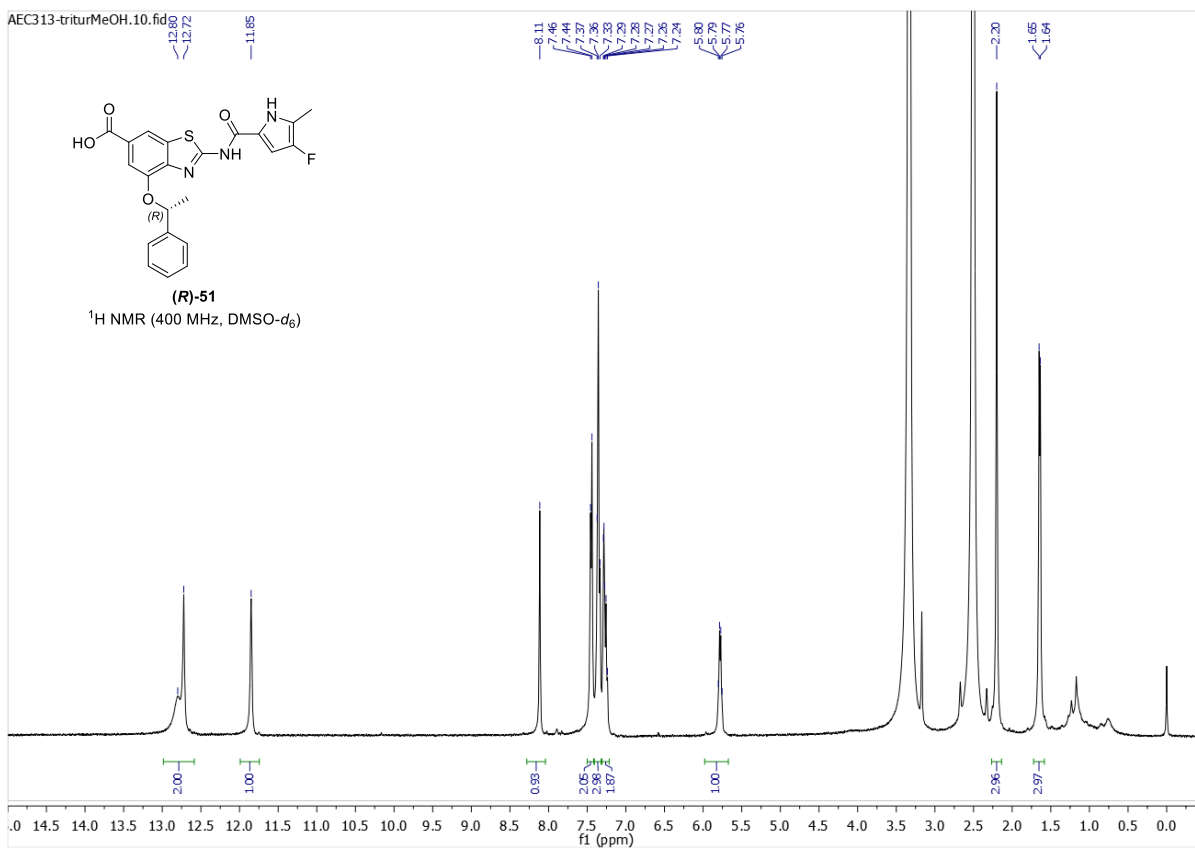

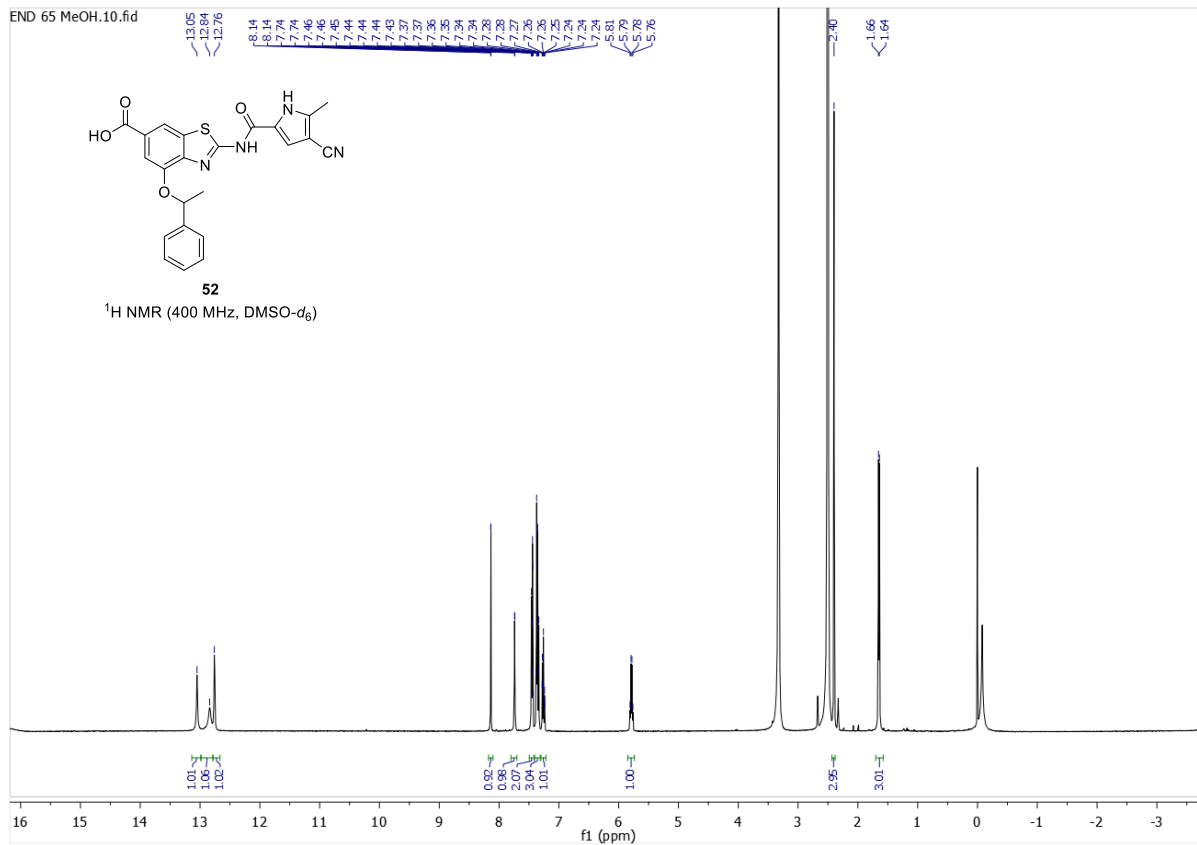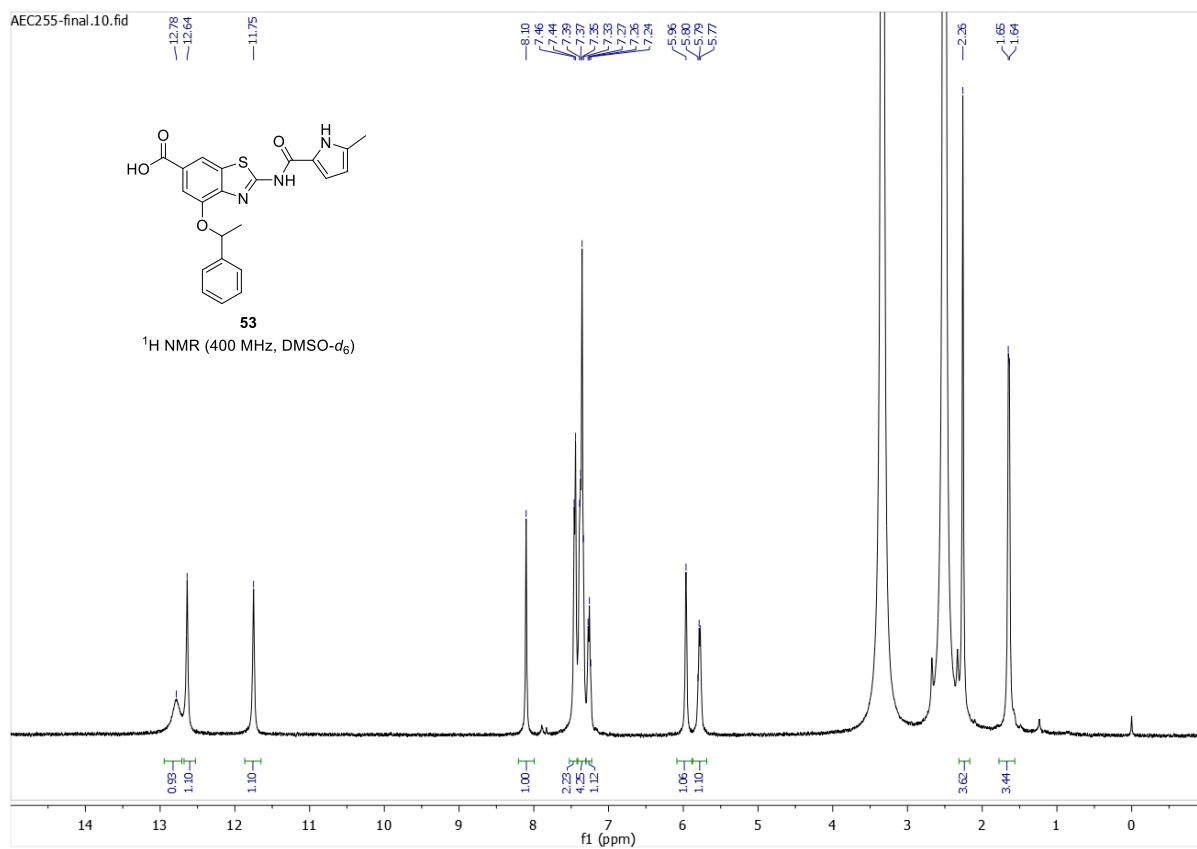



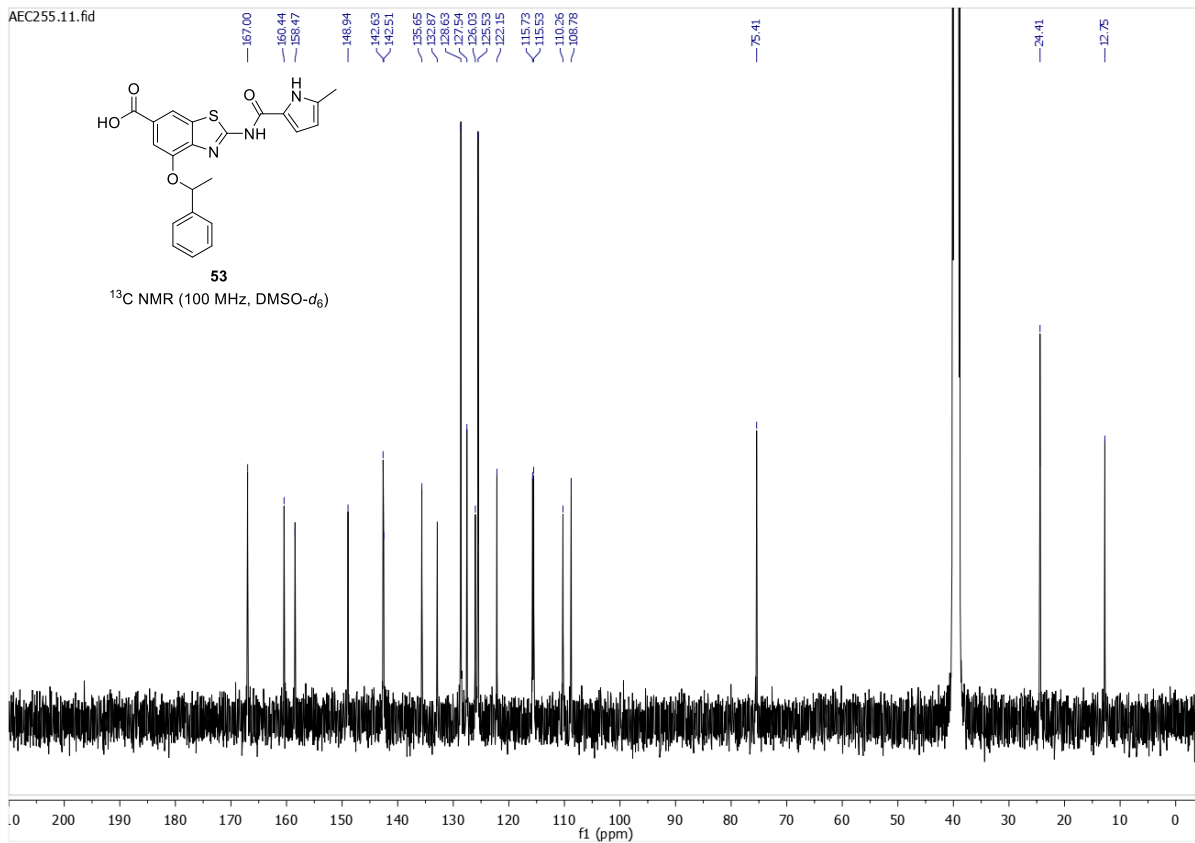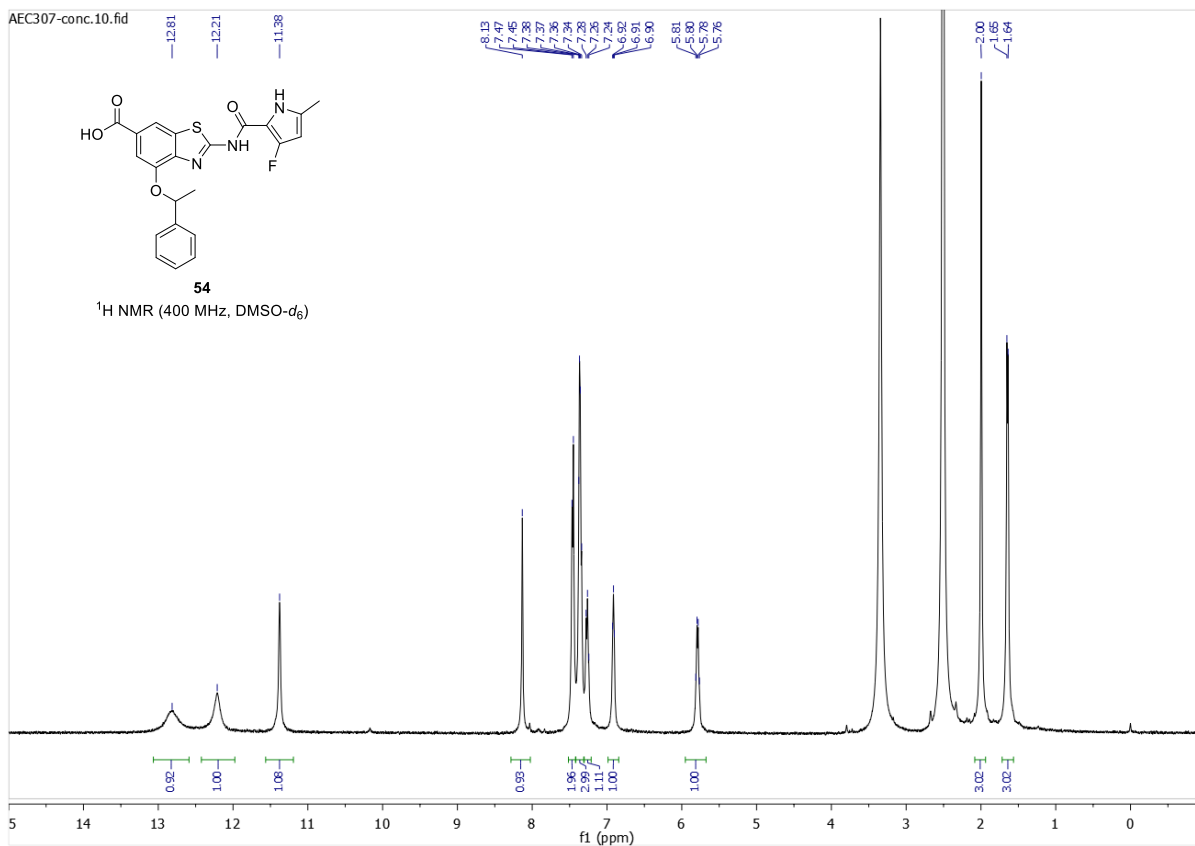

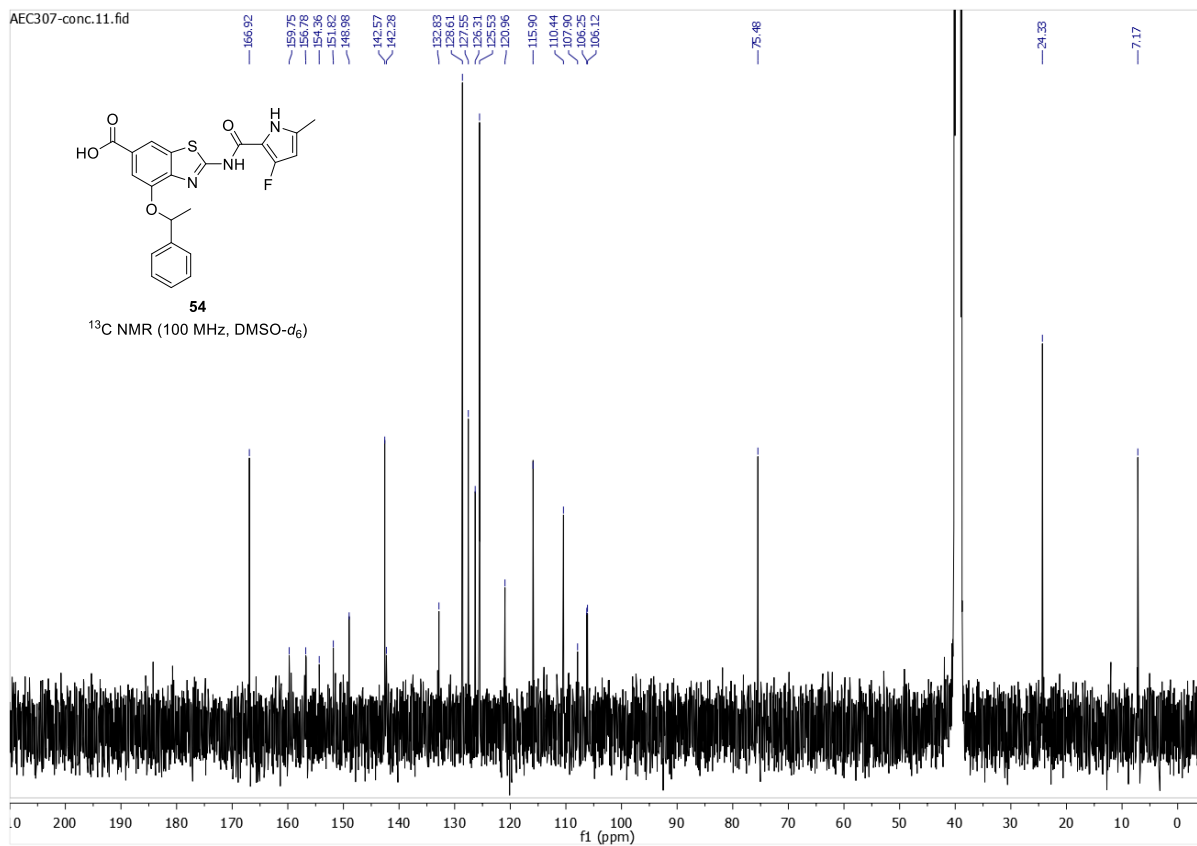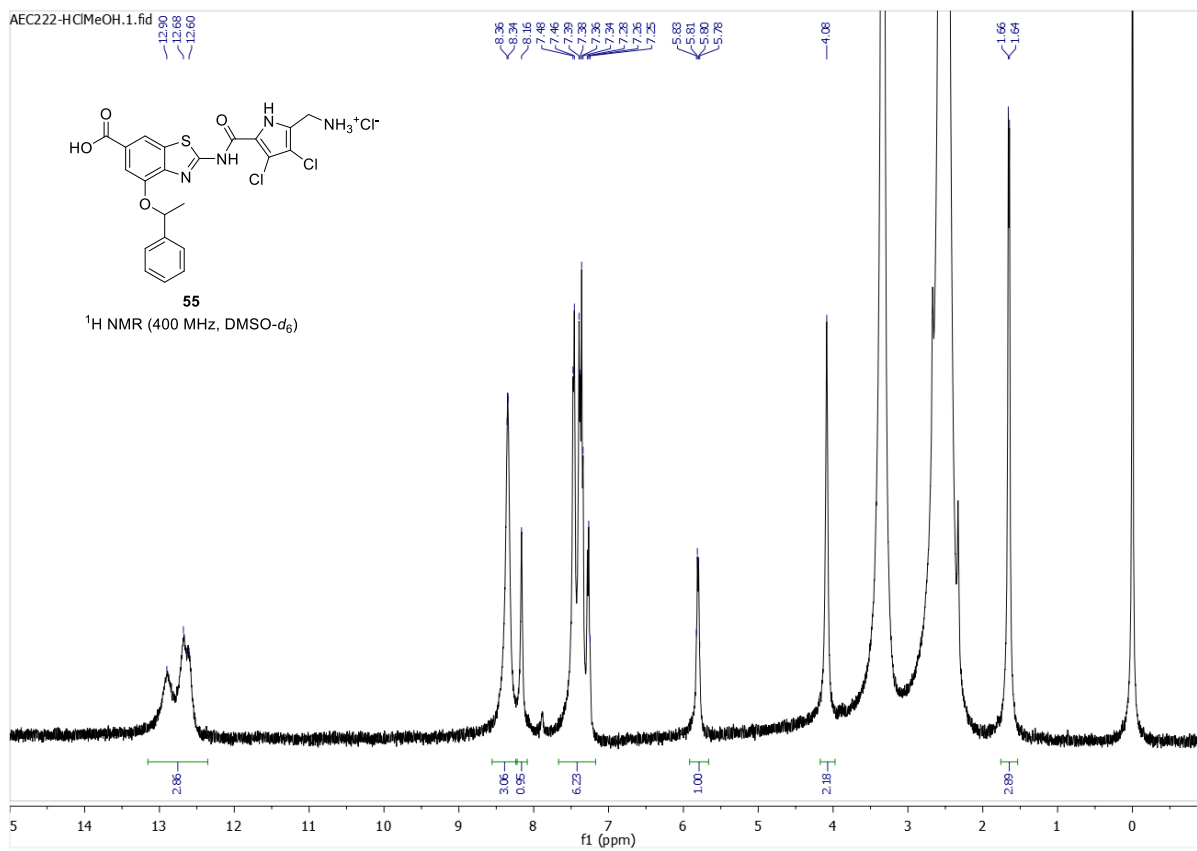

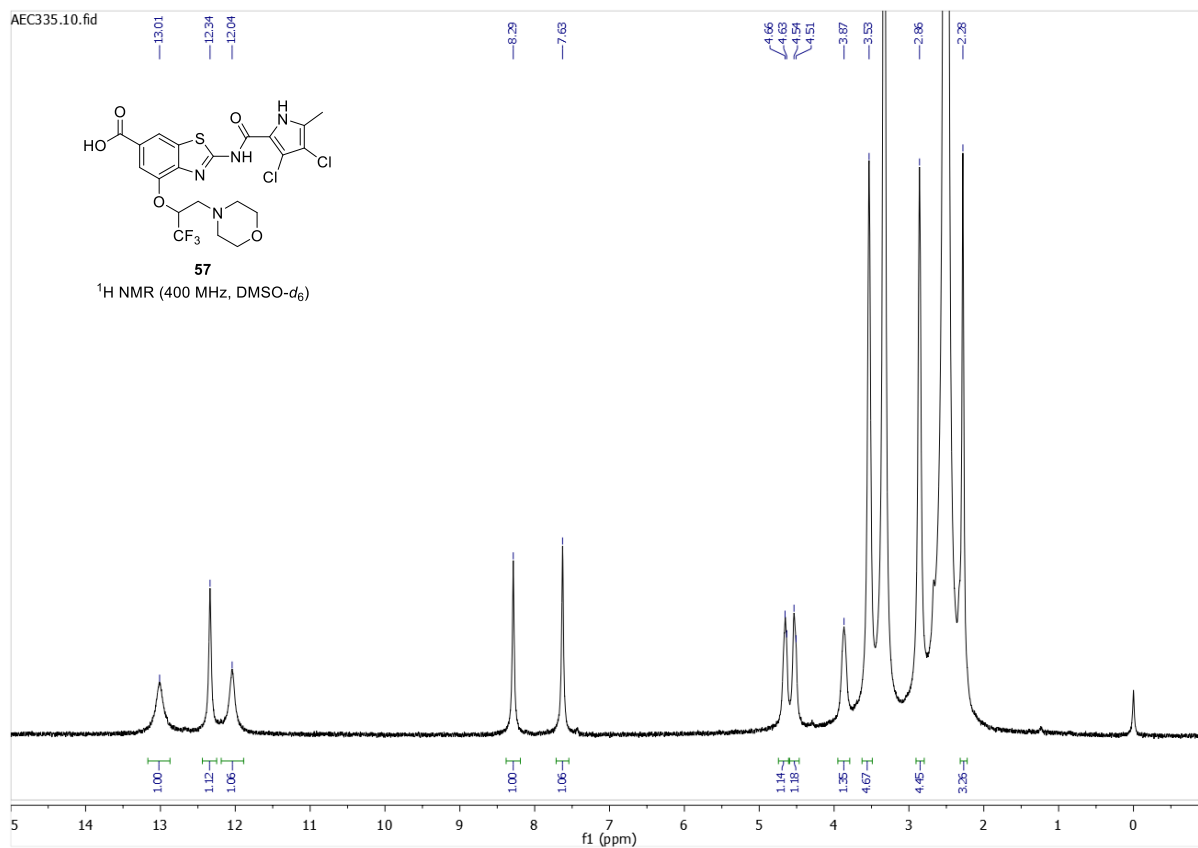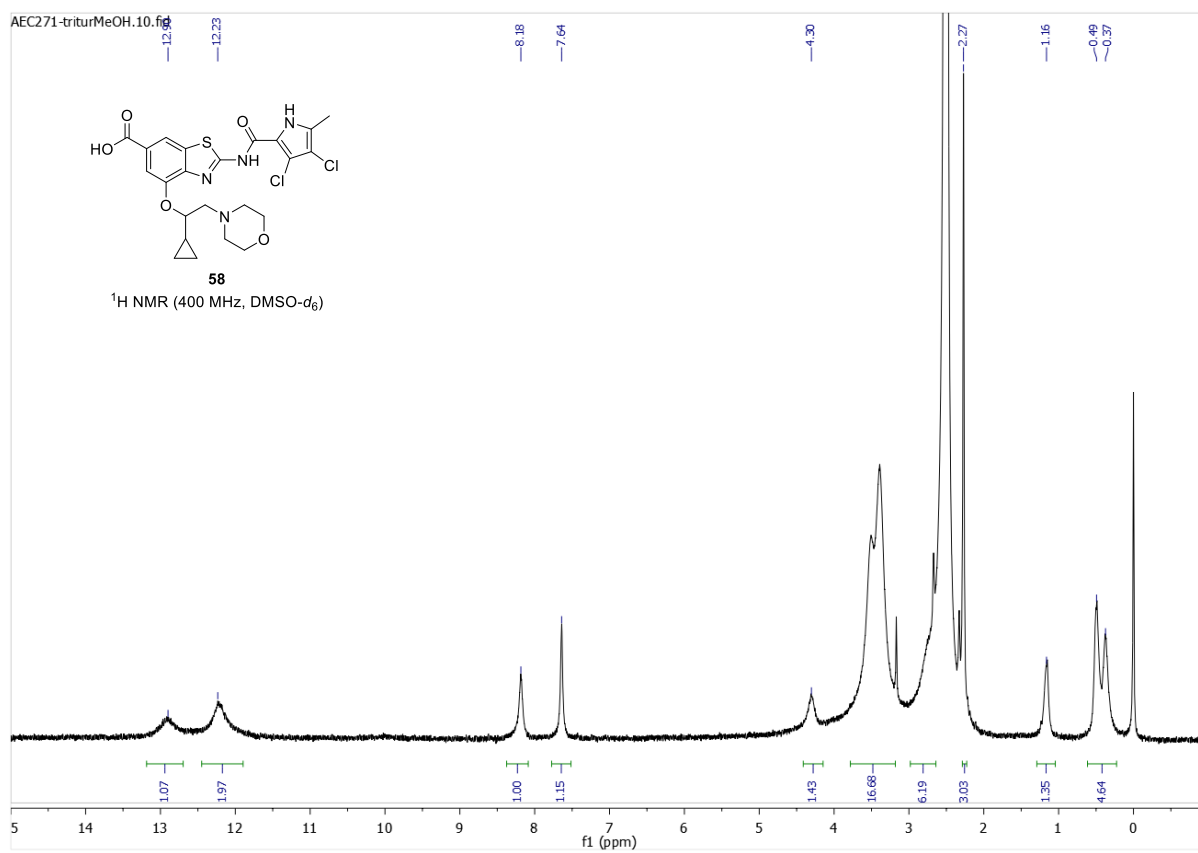

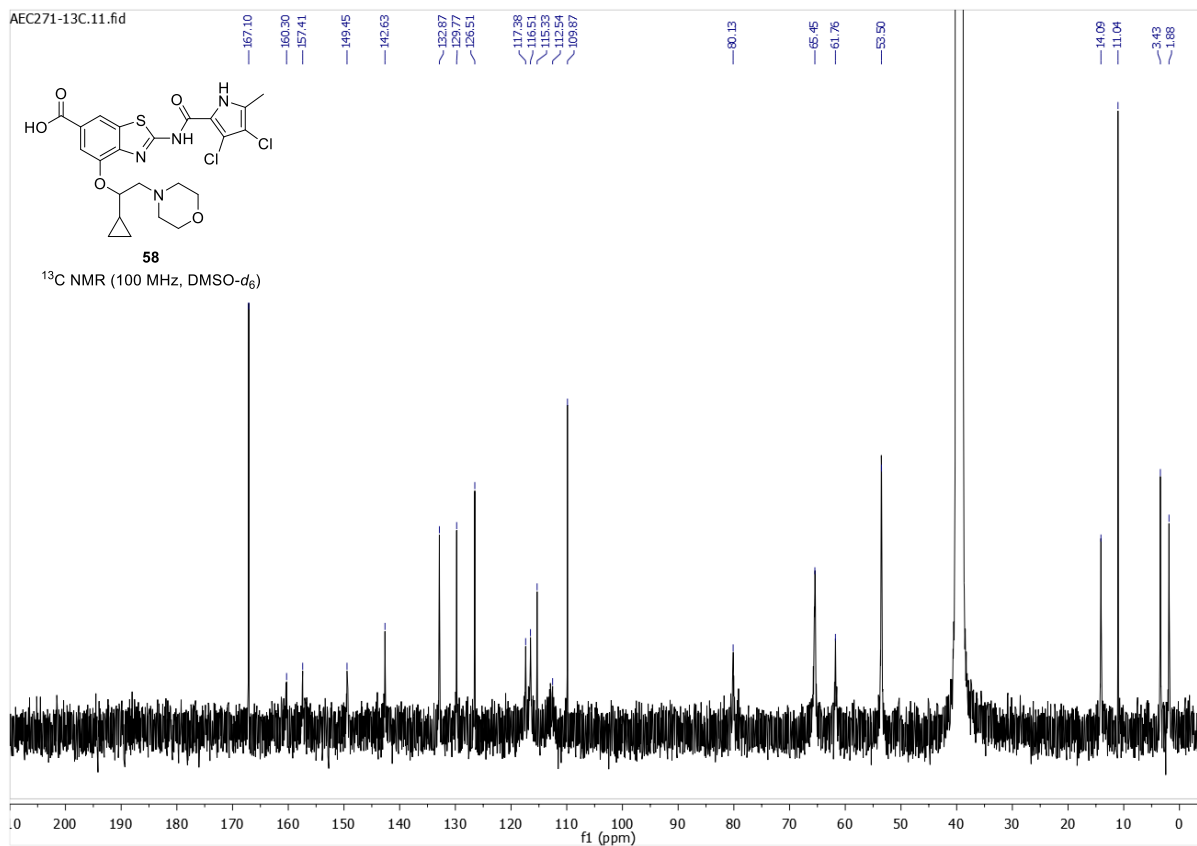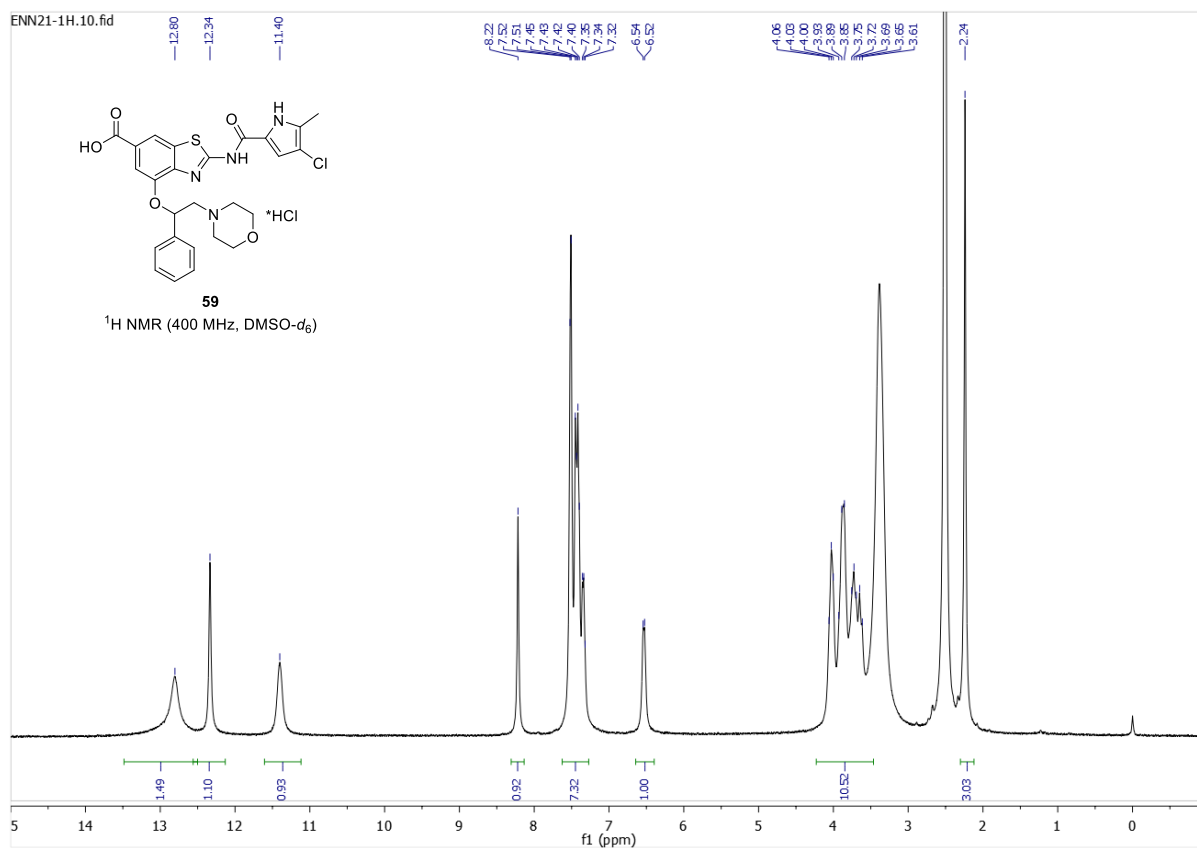

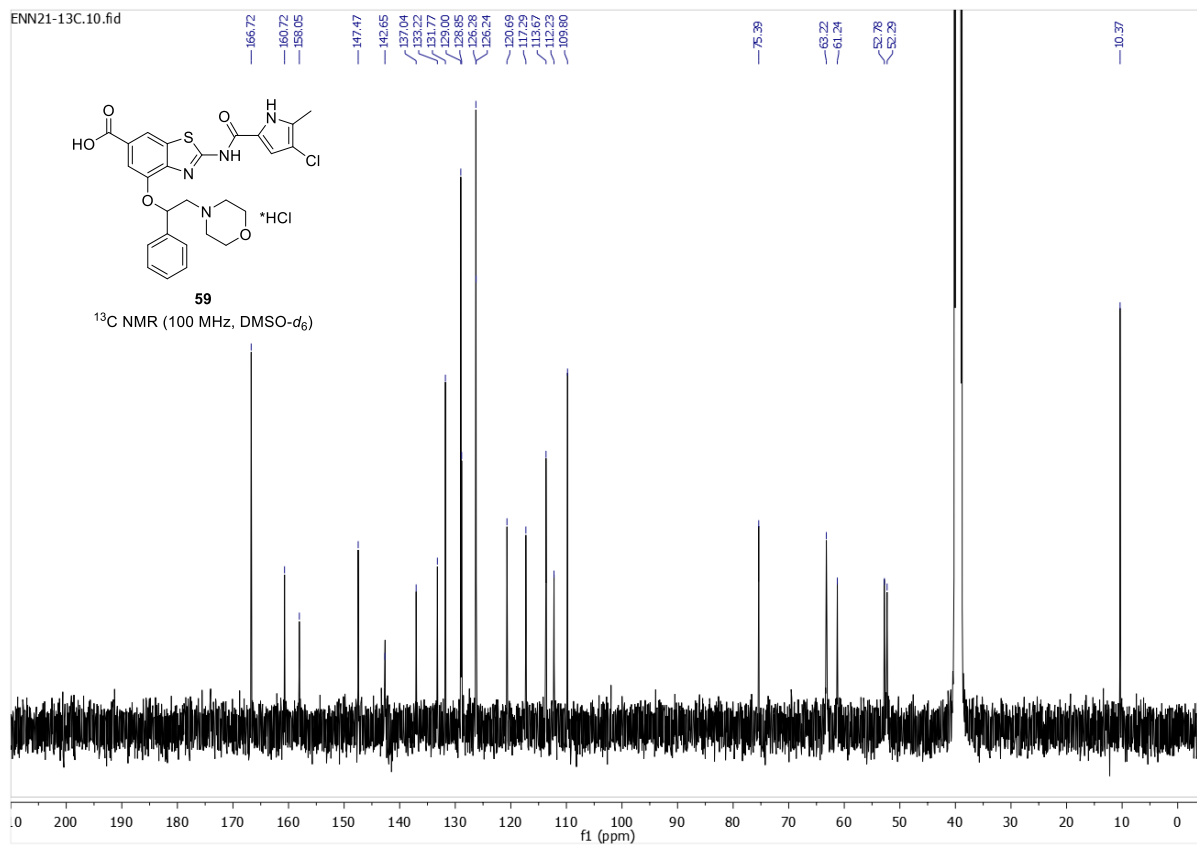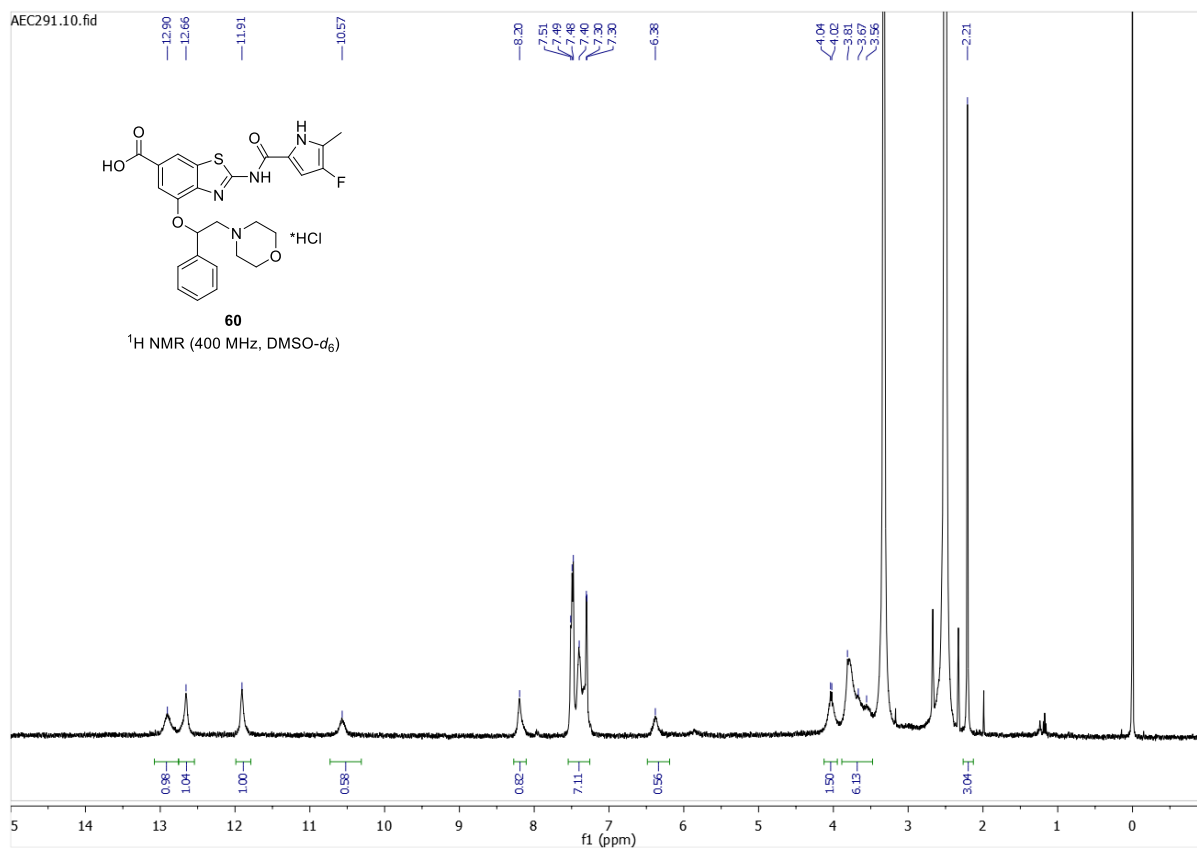

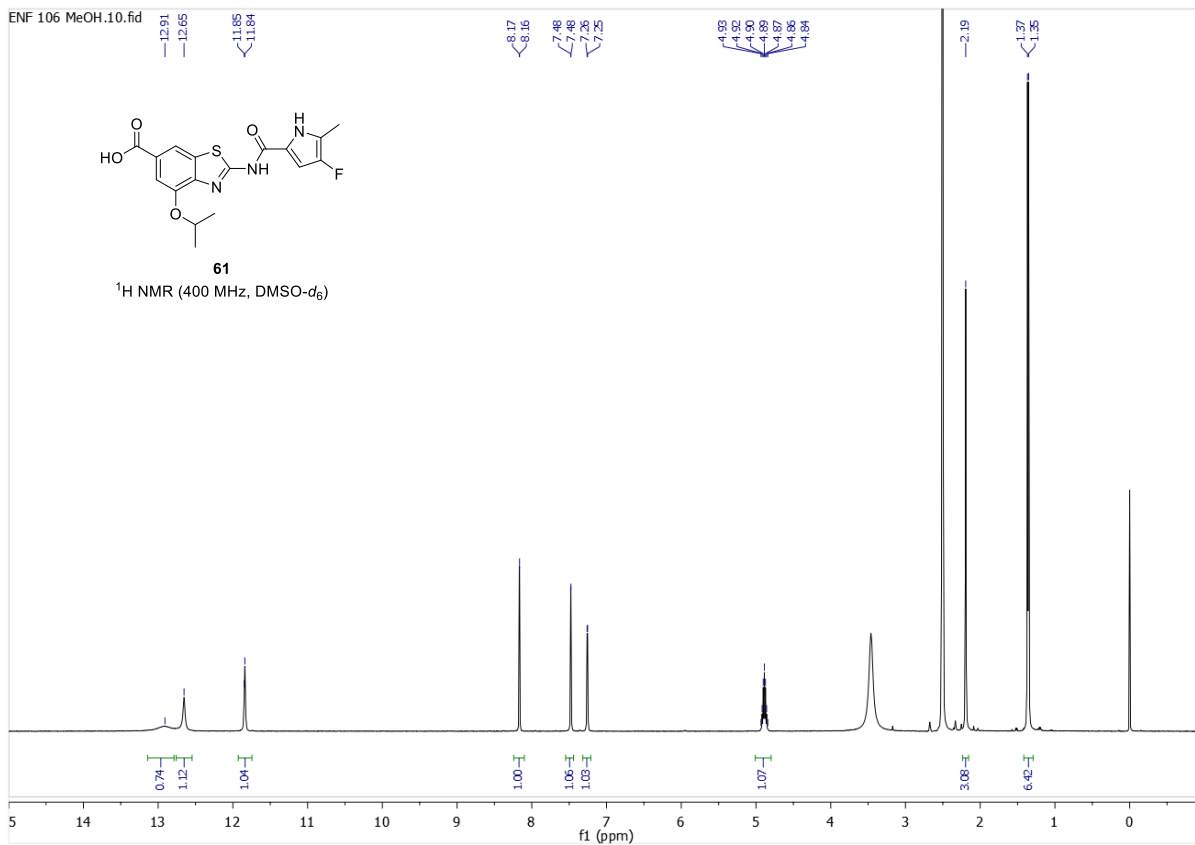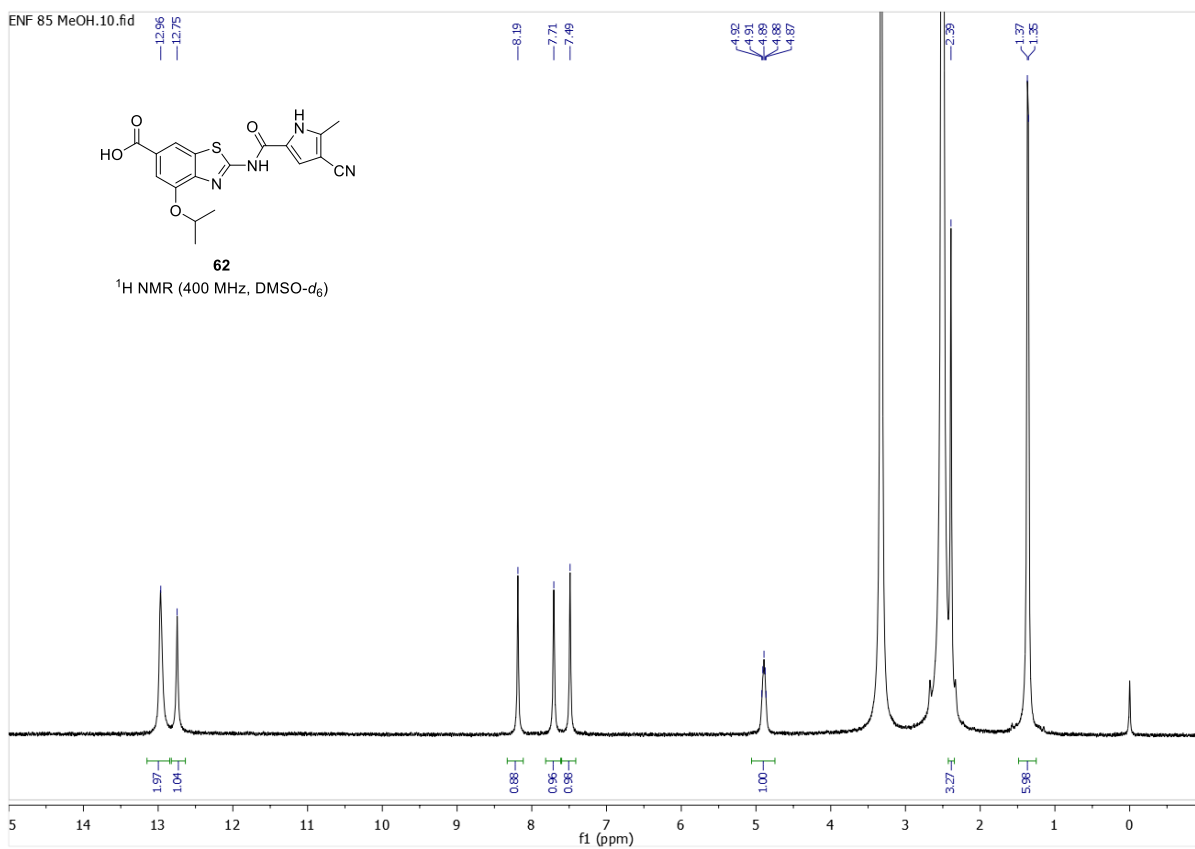

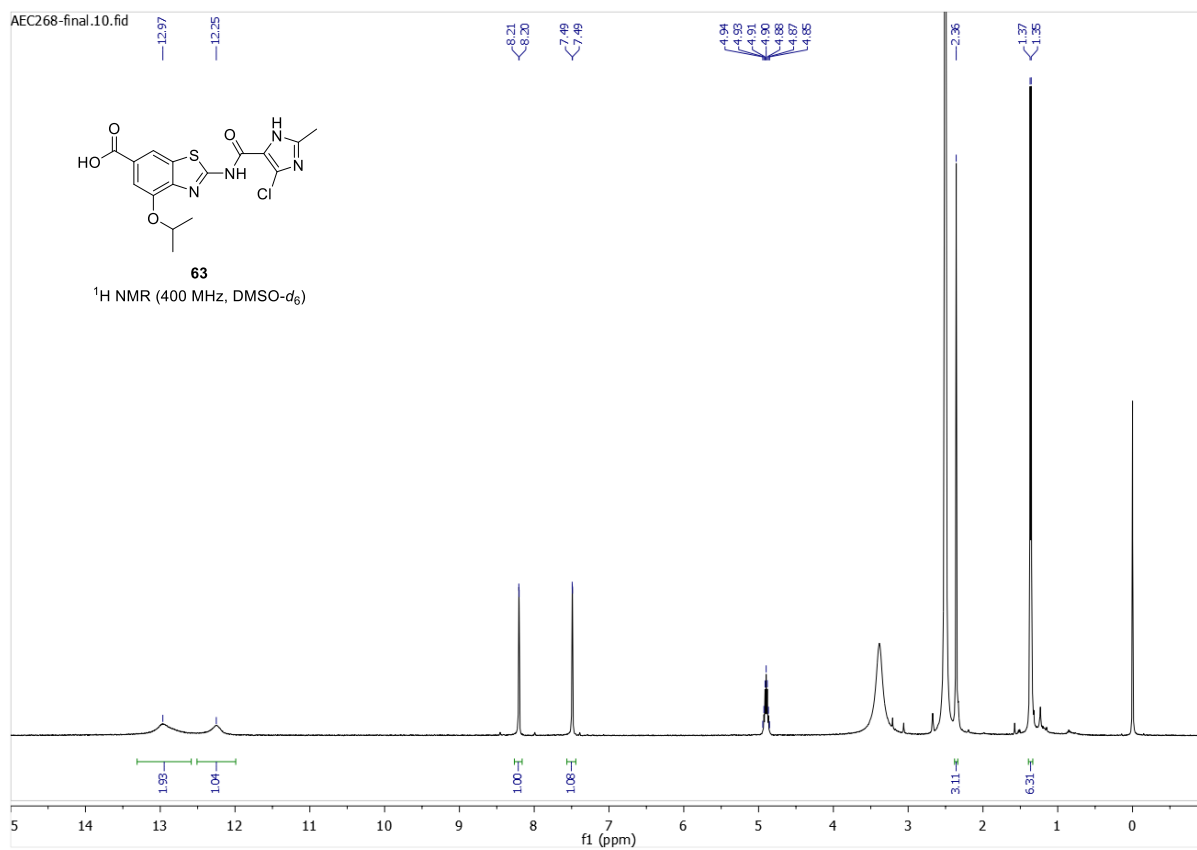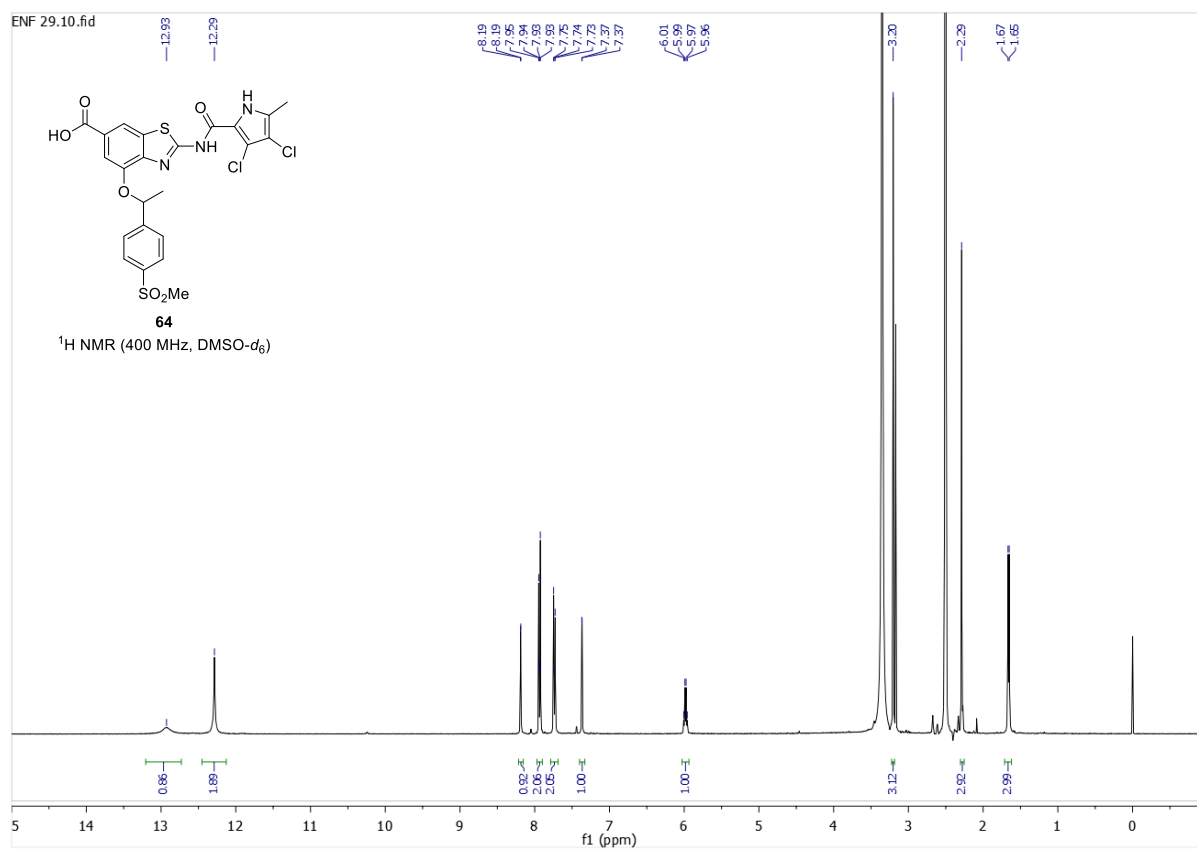

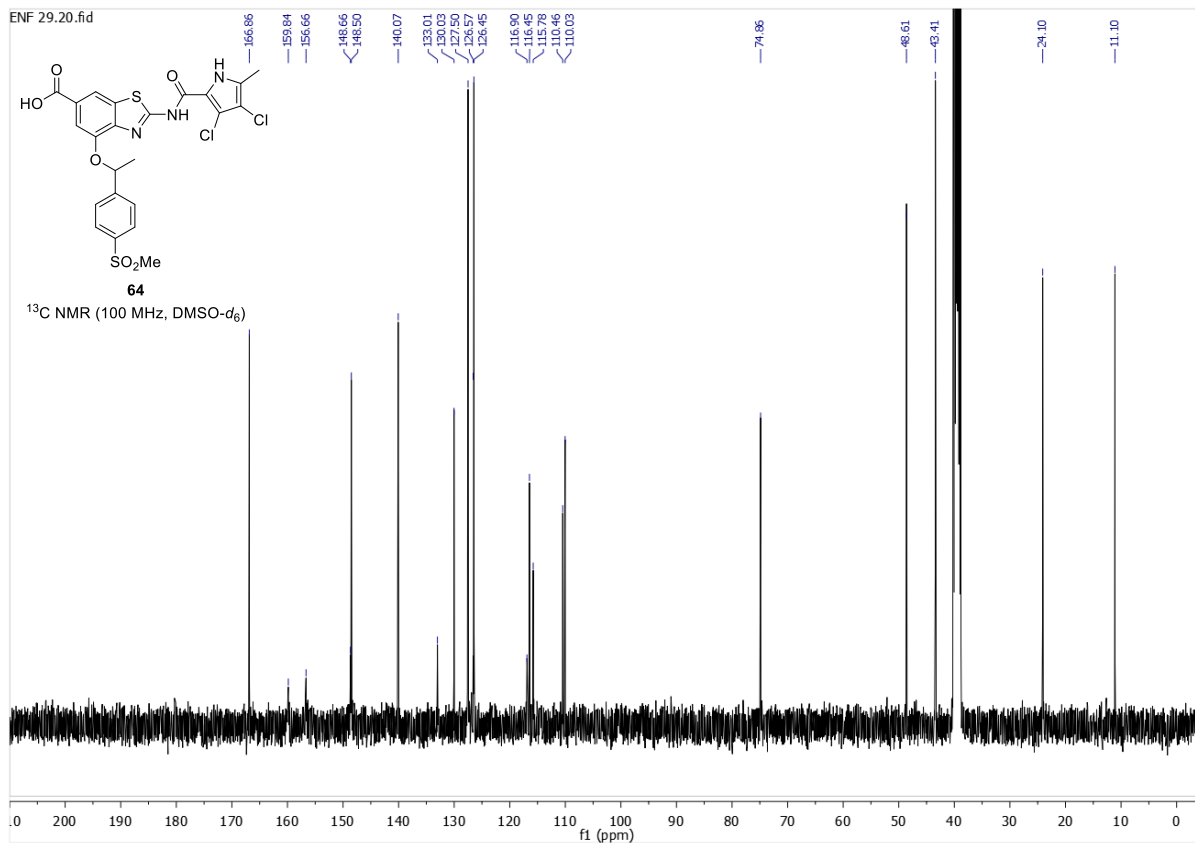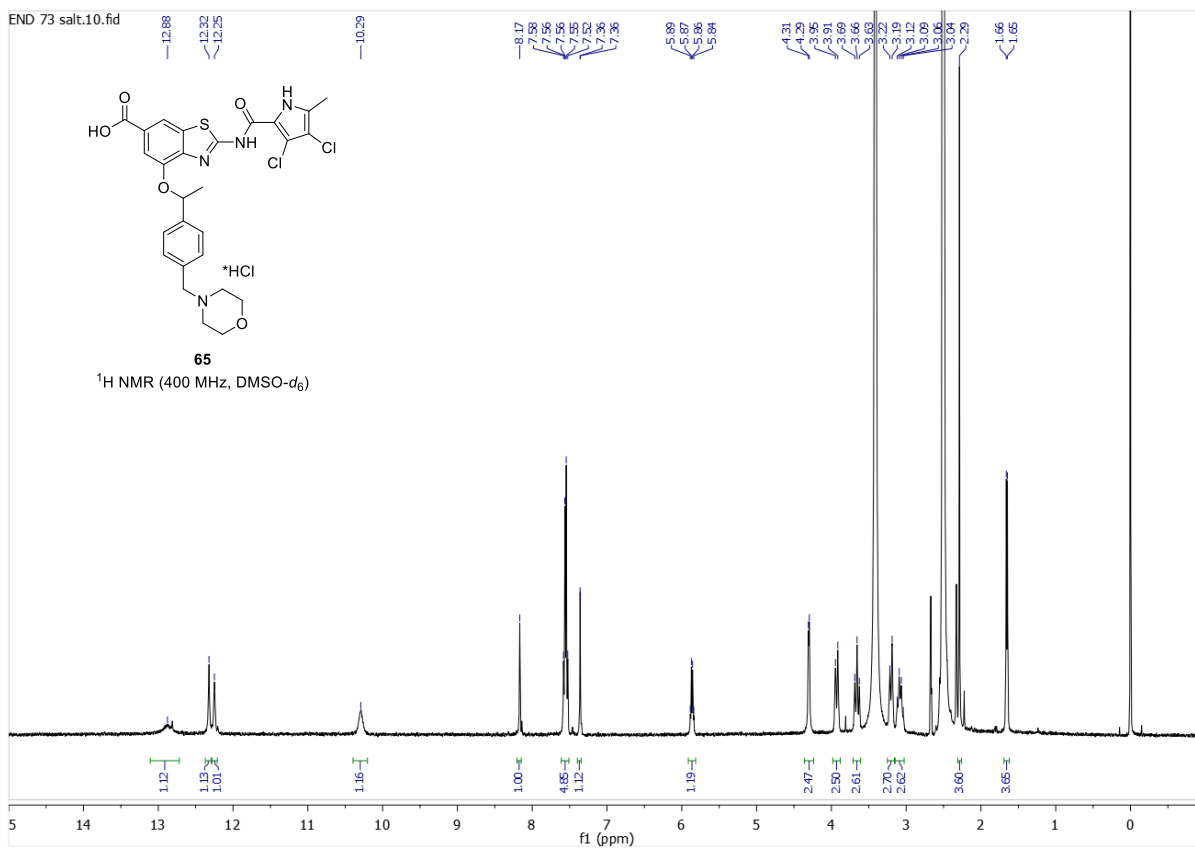



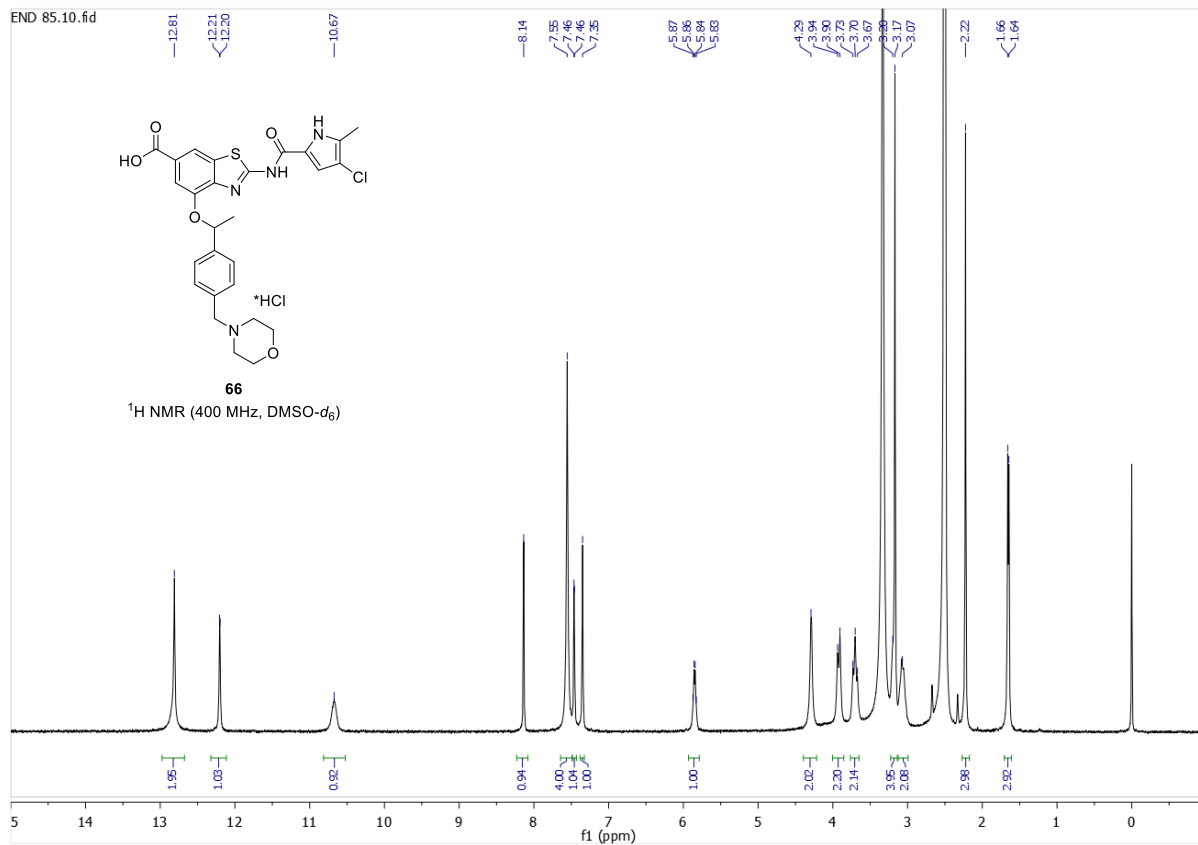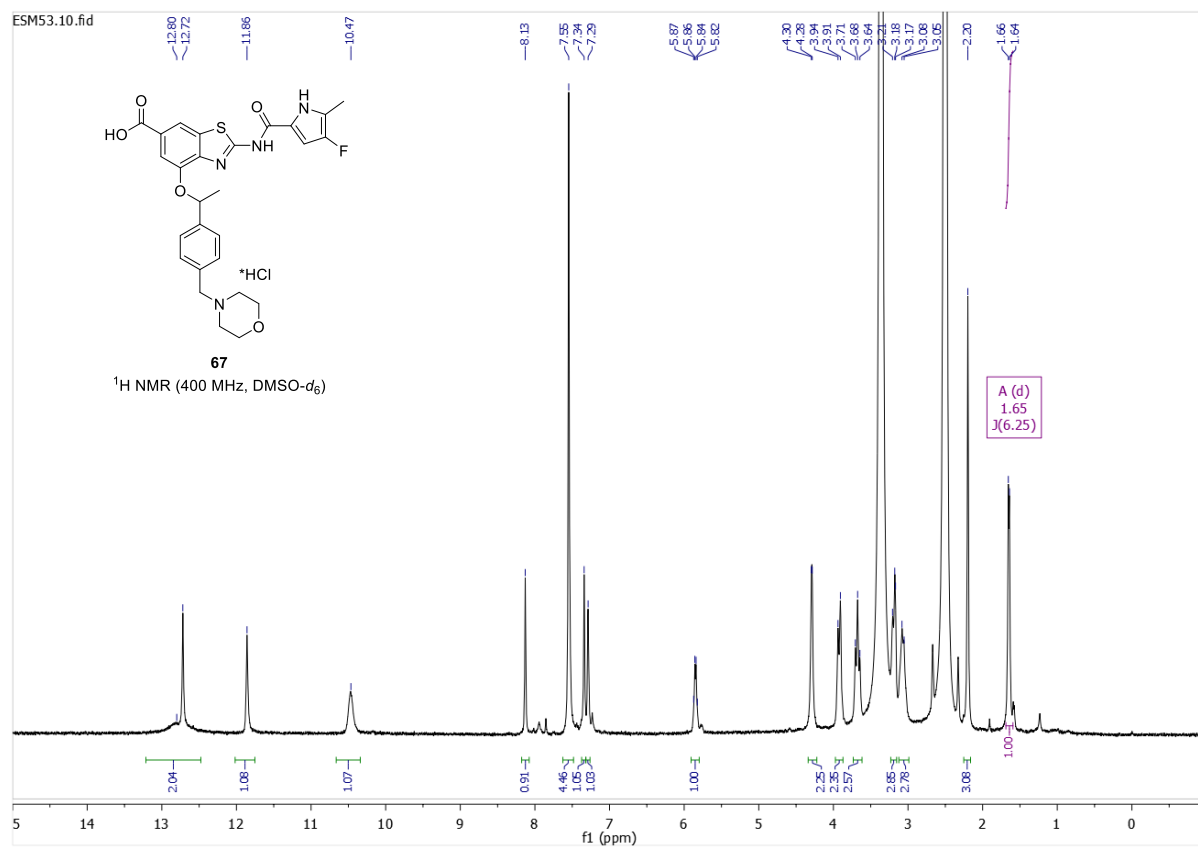

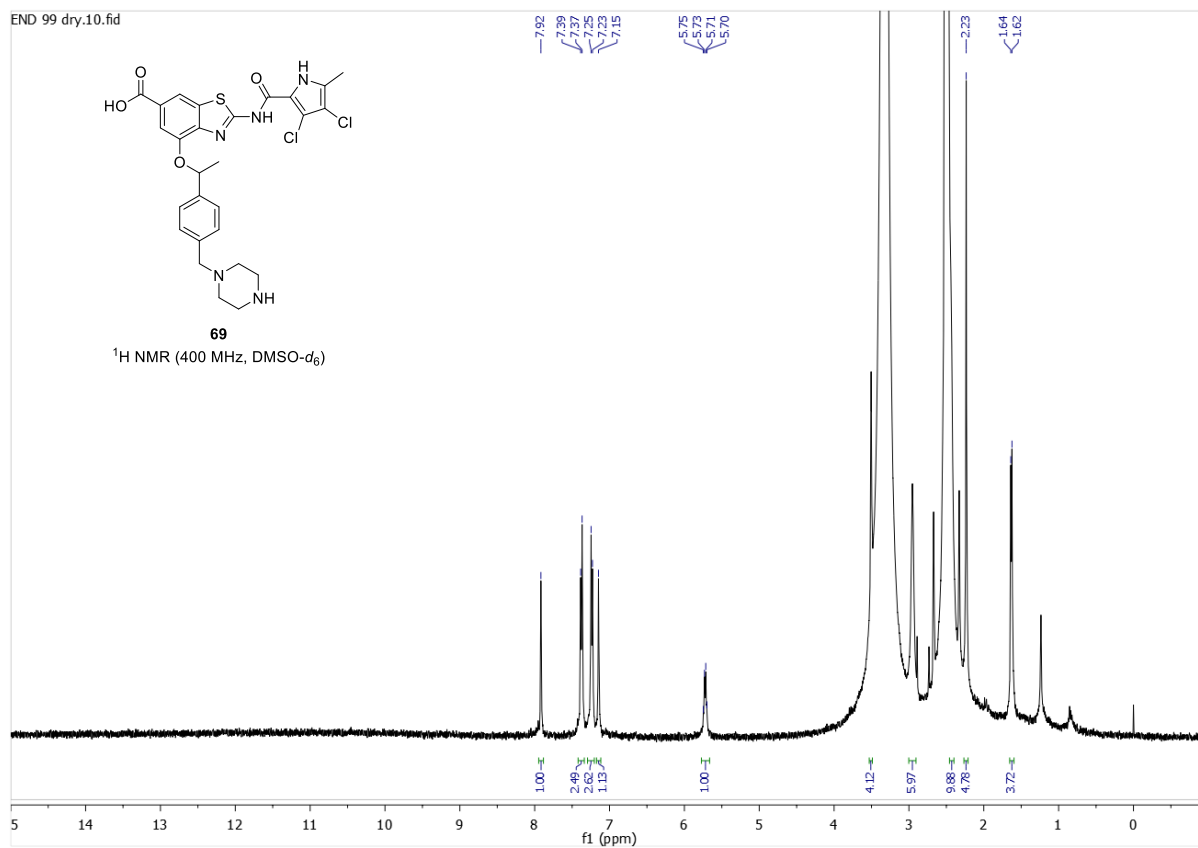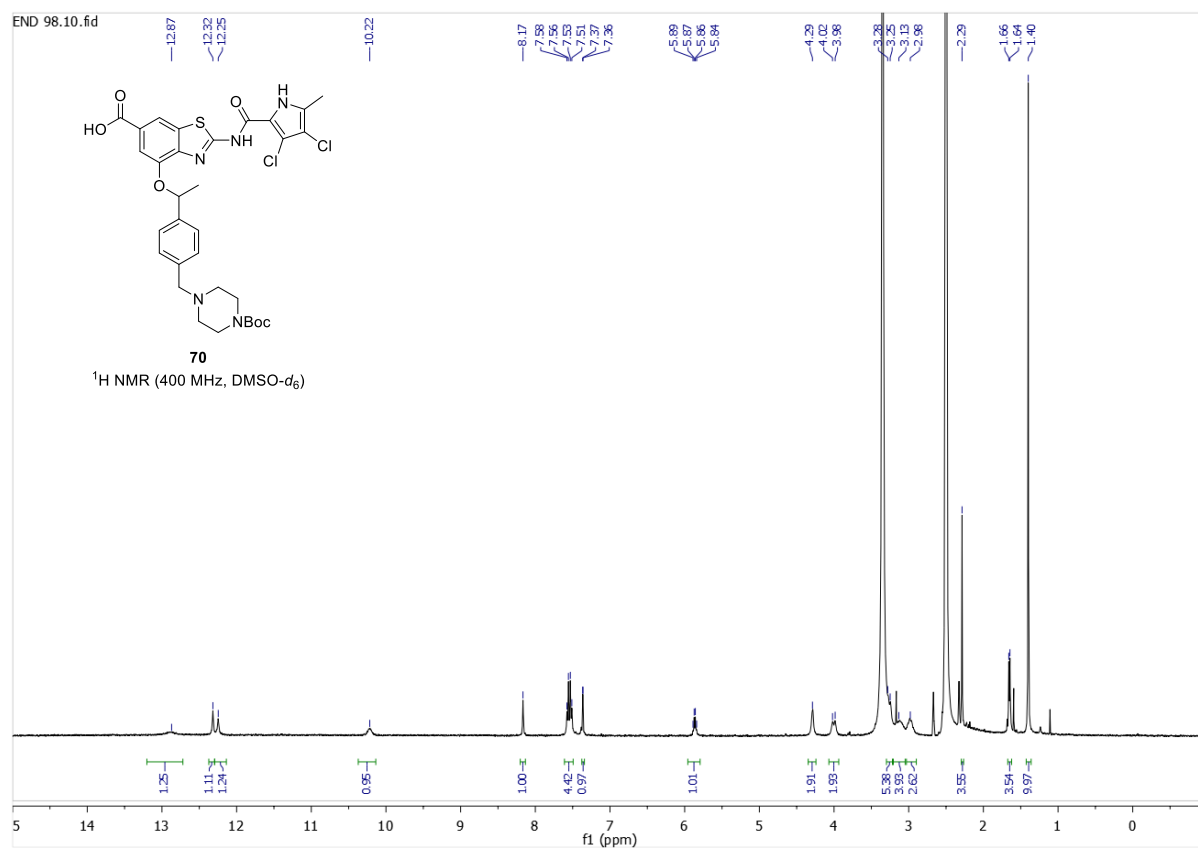

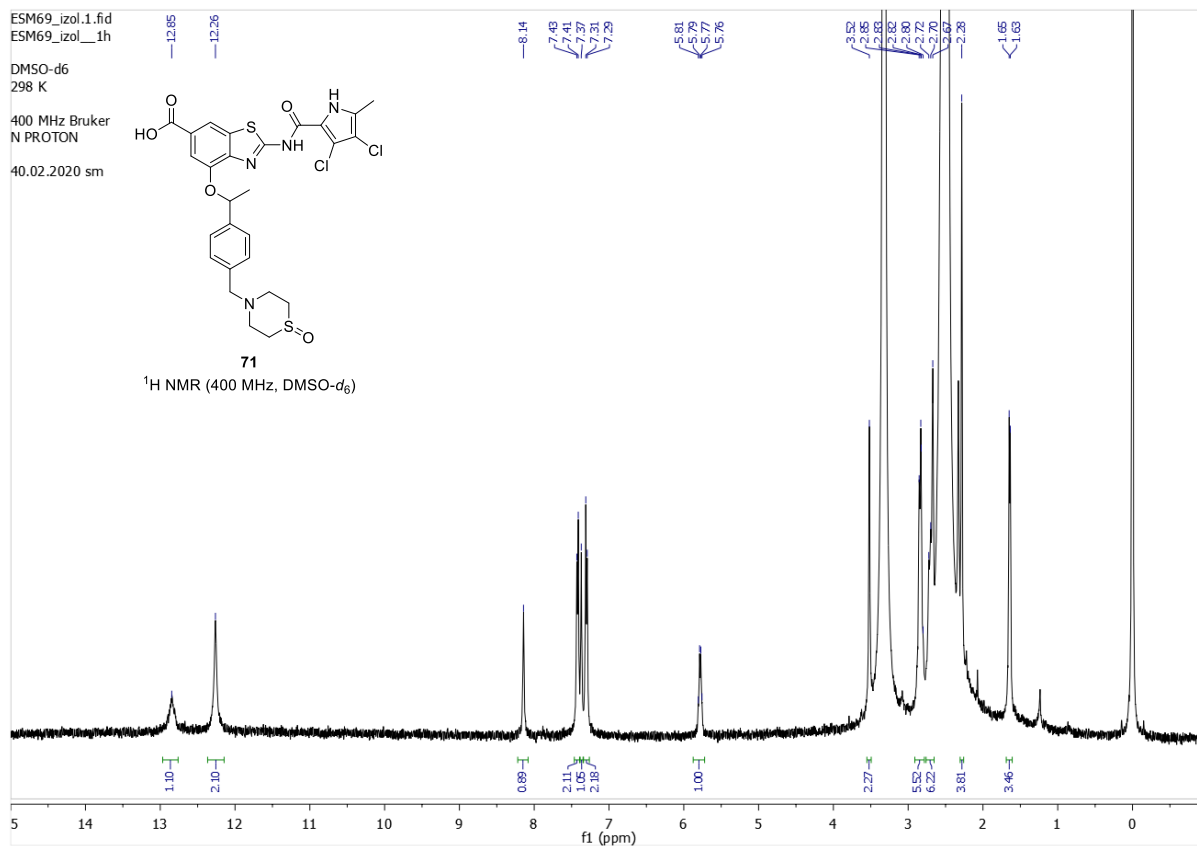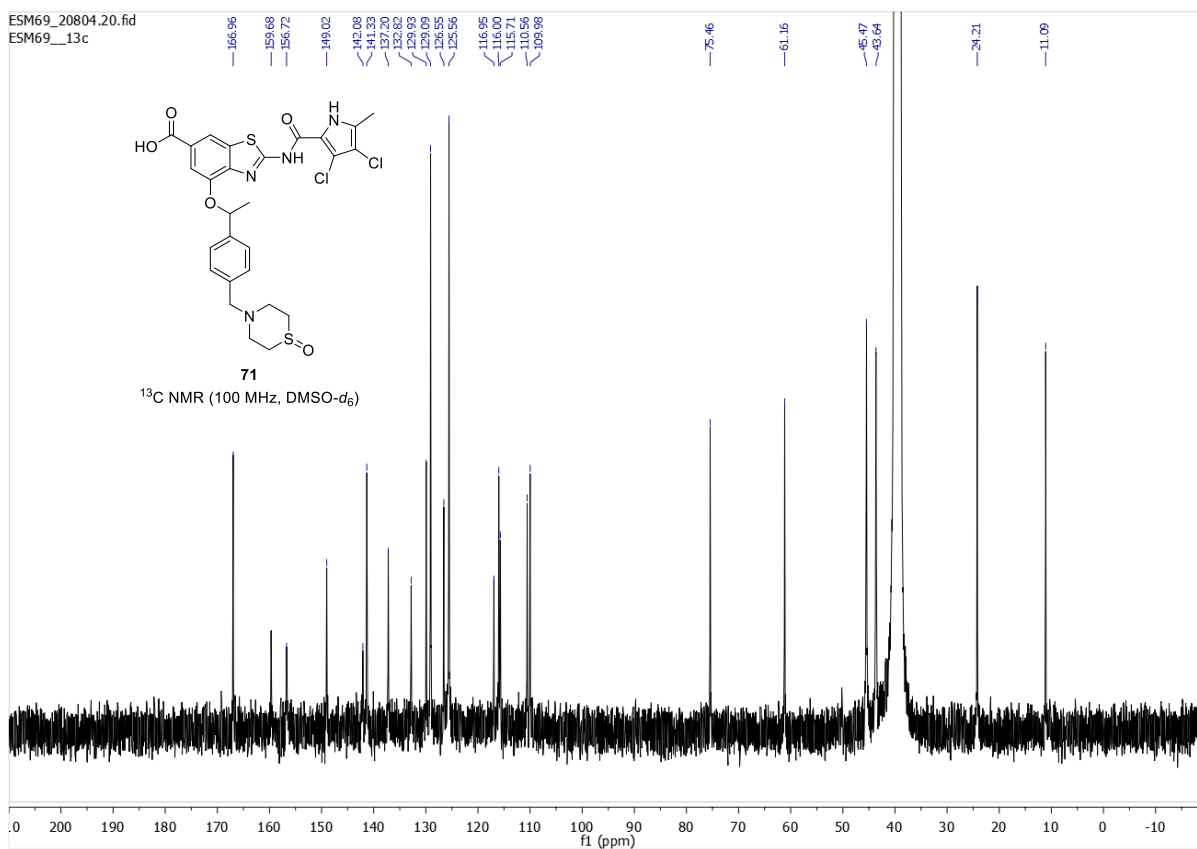

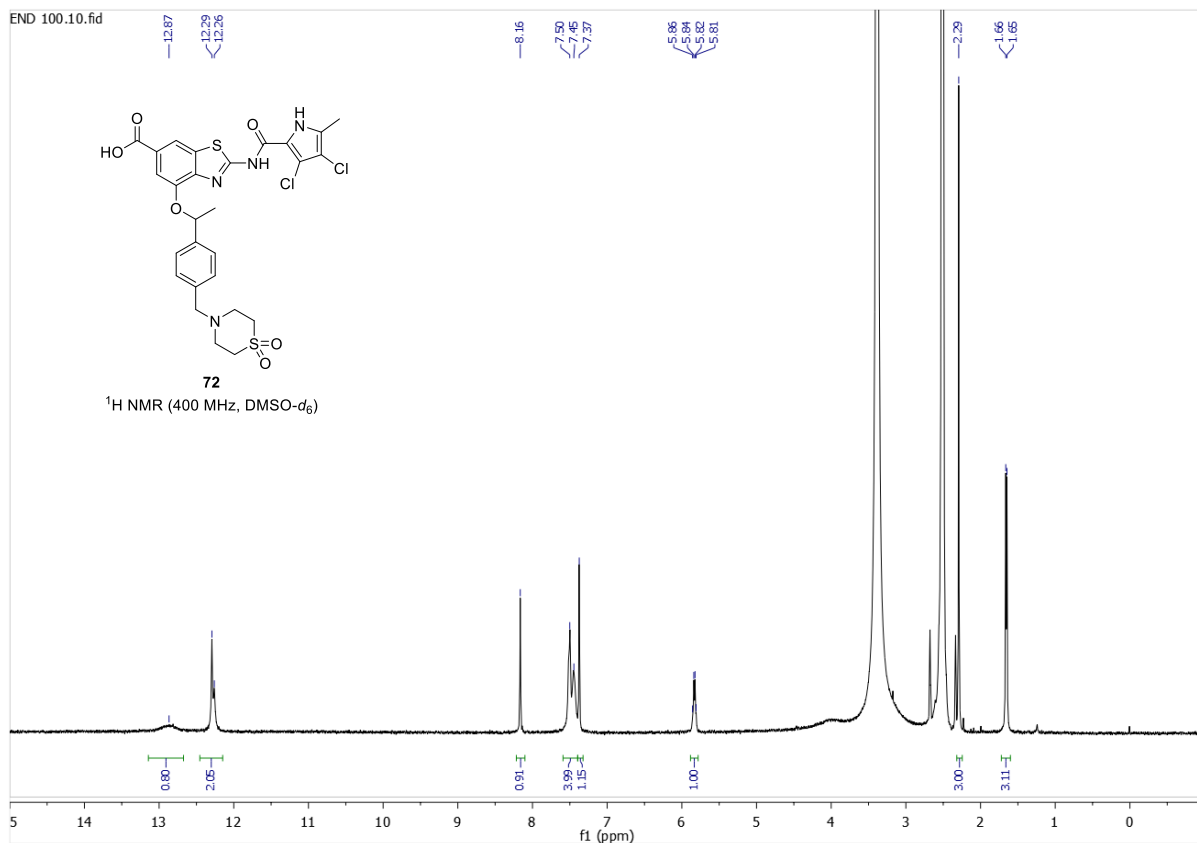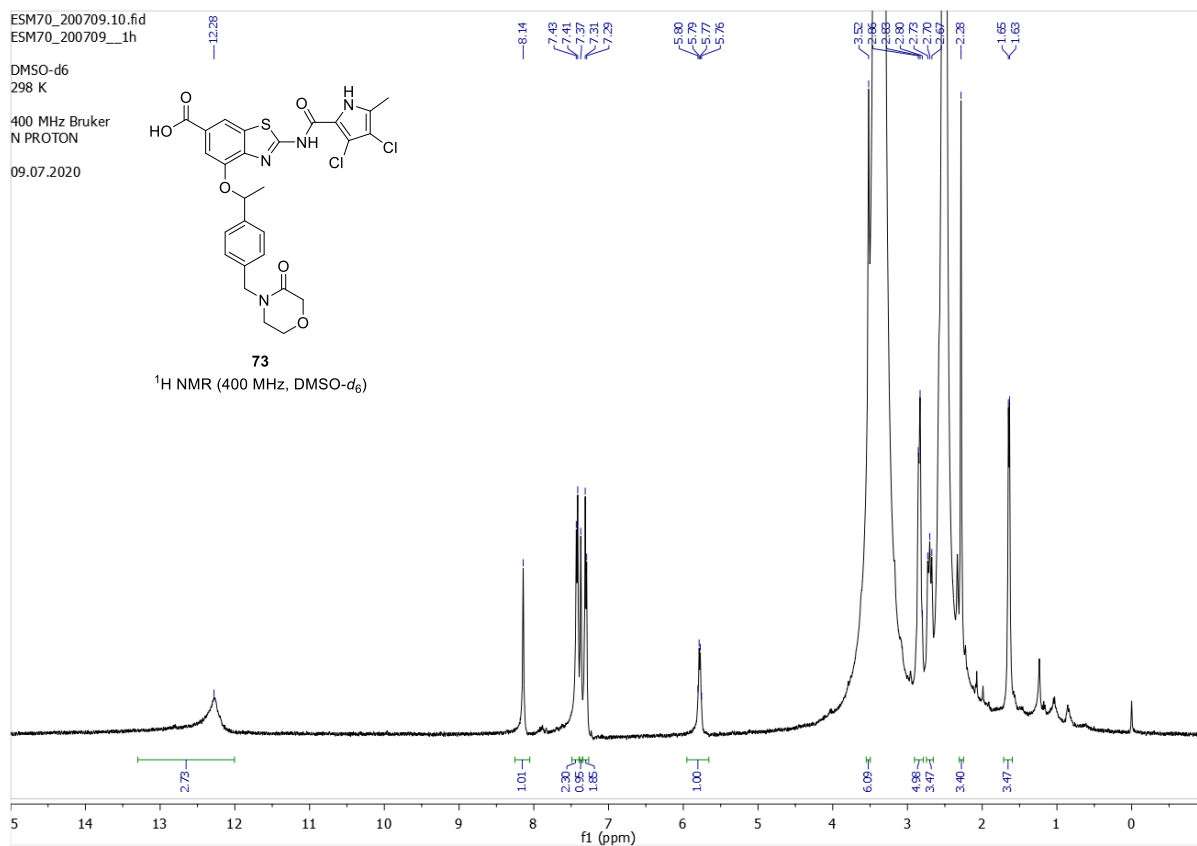

## HPLC traces

## Compound 2:

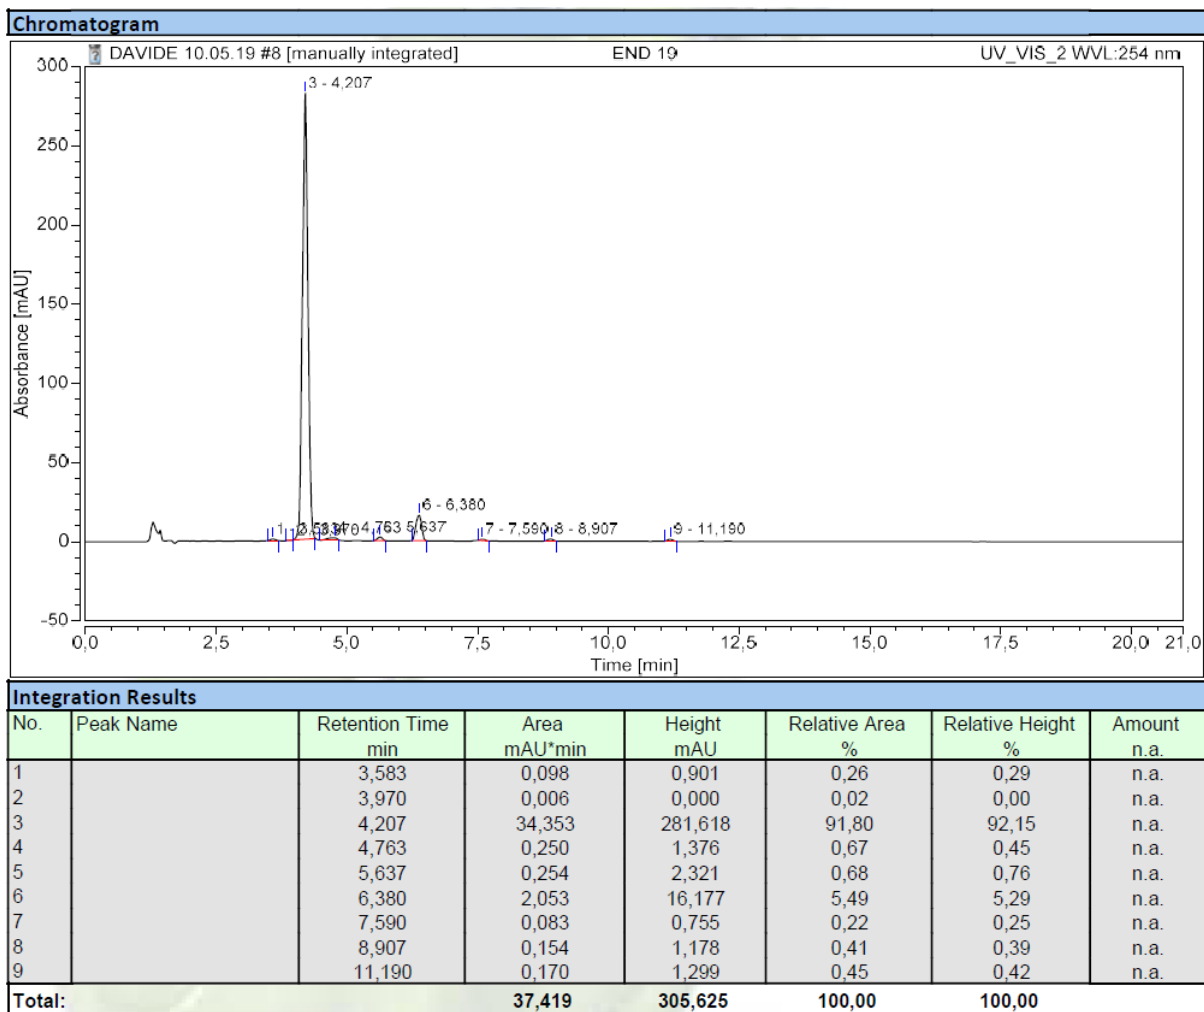

Compound 3:

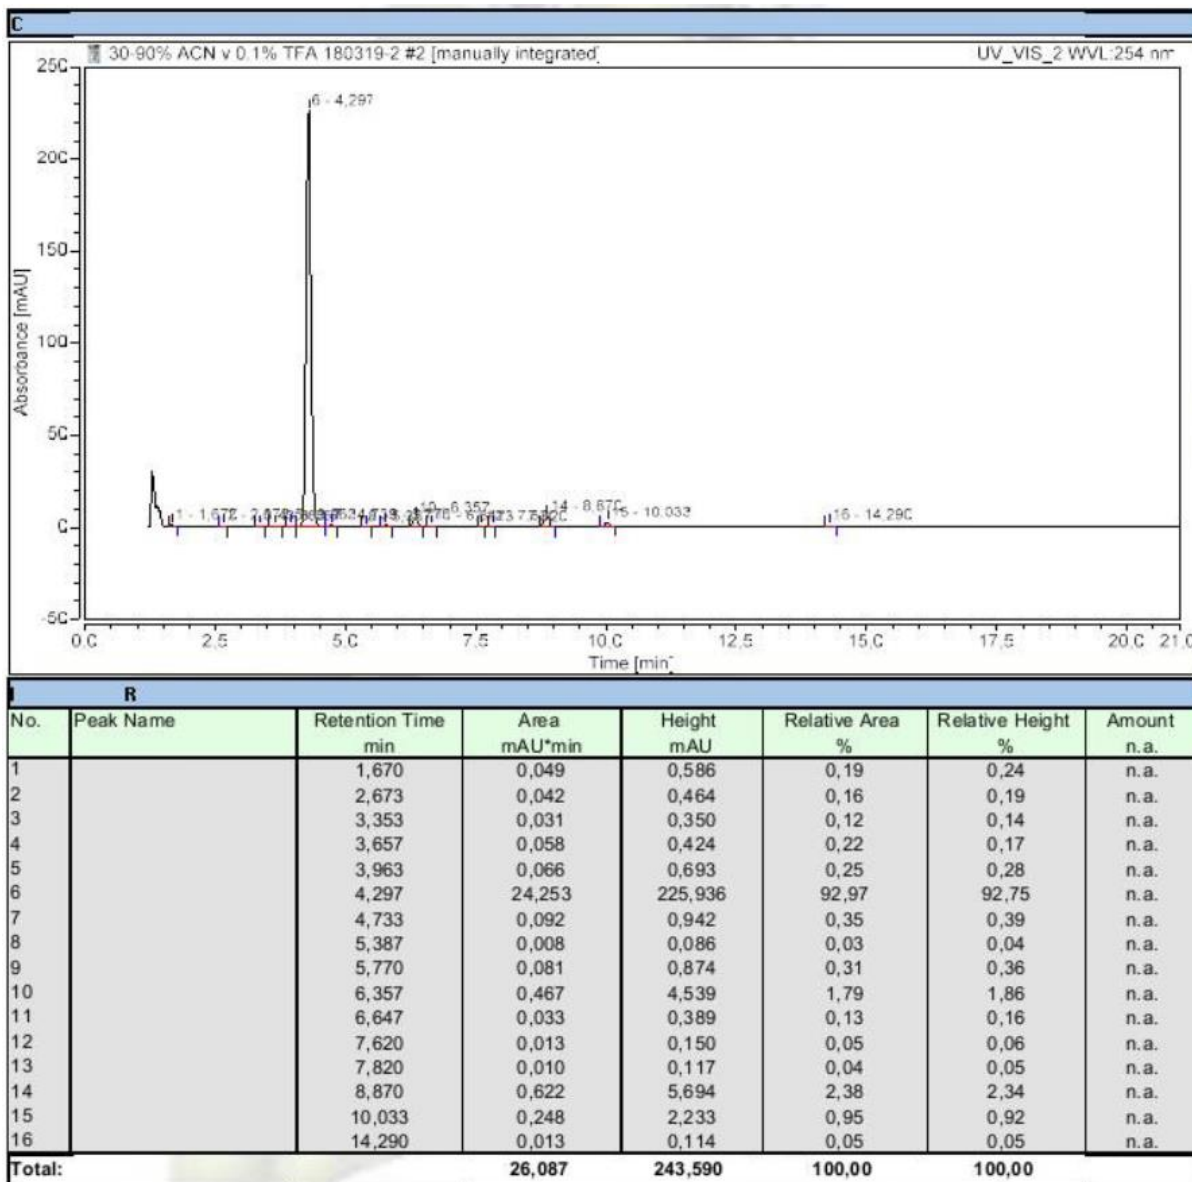

## Compound 4:

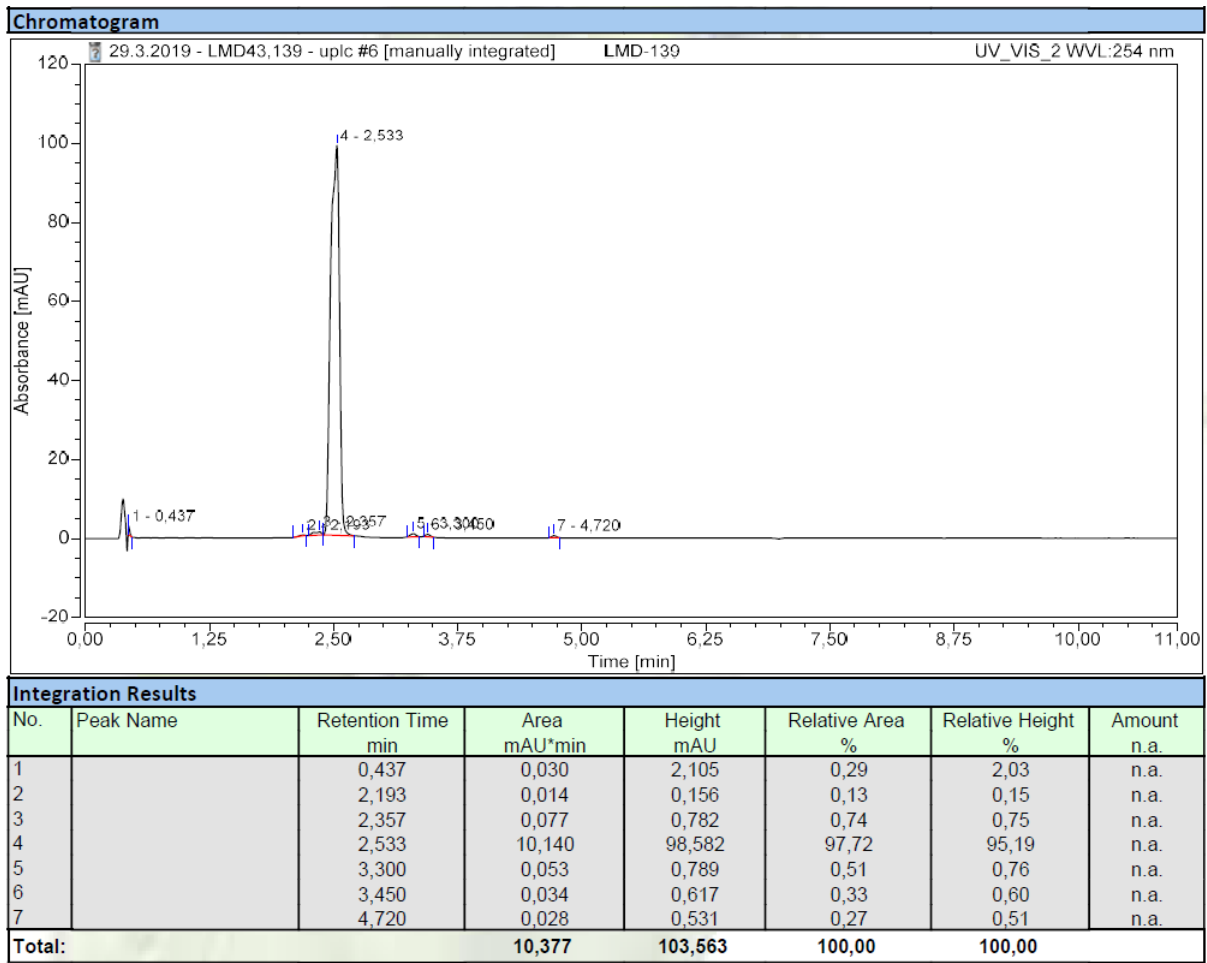

## Compound 5:

Intensity VWD: Signal A, 254 nm  
LMD-212k\_UV.datx 2019.09.09 11:55:47 ;

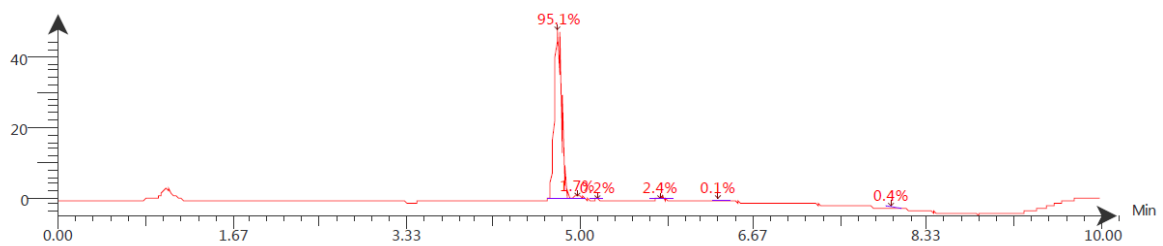

**Compound 6:**

Intensity VWD: Signal A, 254 nm  
LMD-217-2\_UV.datx 2019.09.10 11:41:42 ;

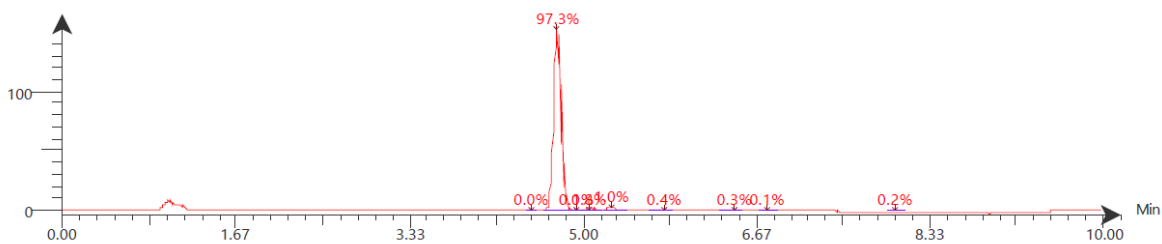

**Compound 8:**

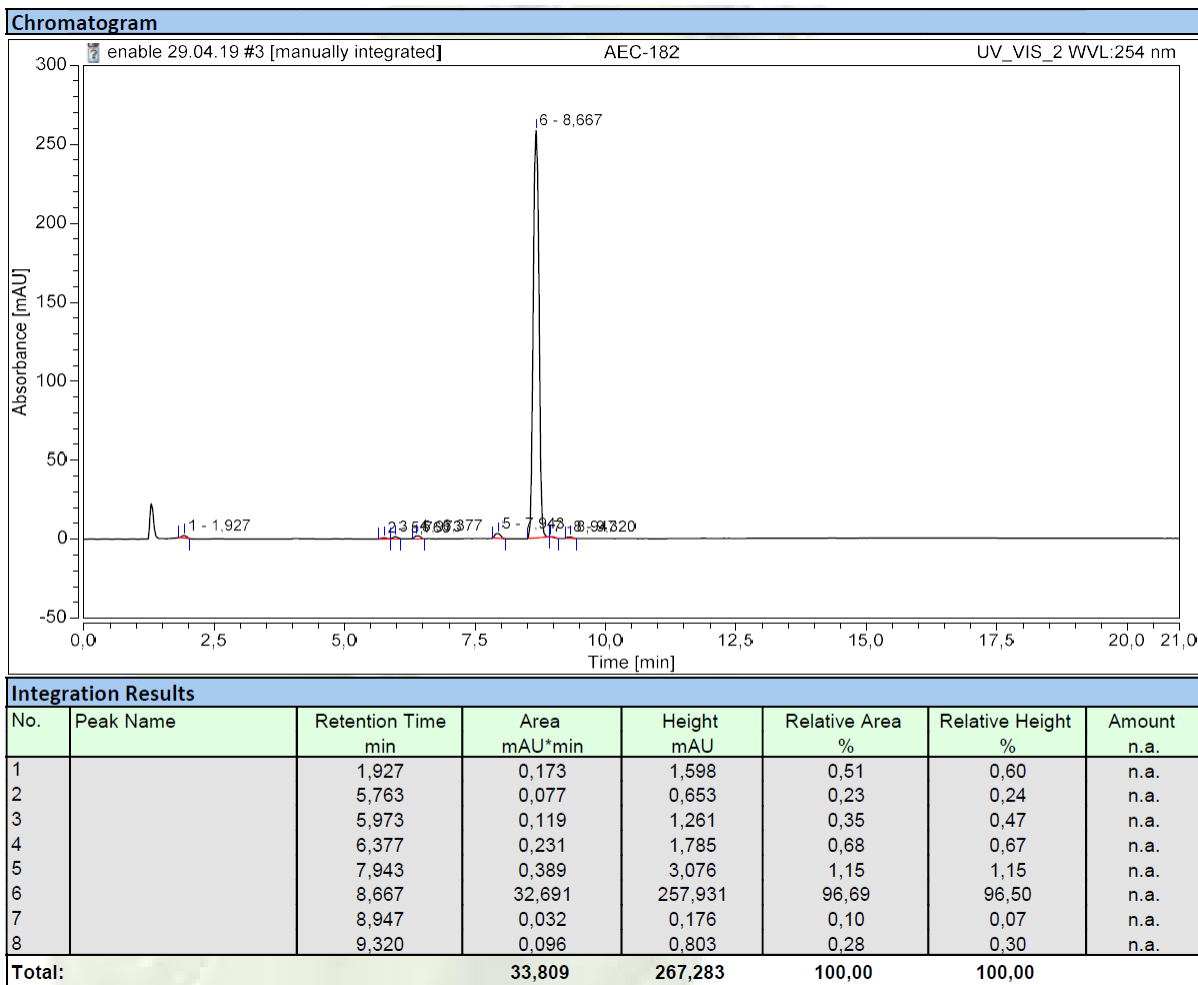



## Compound 9:

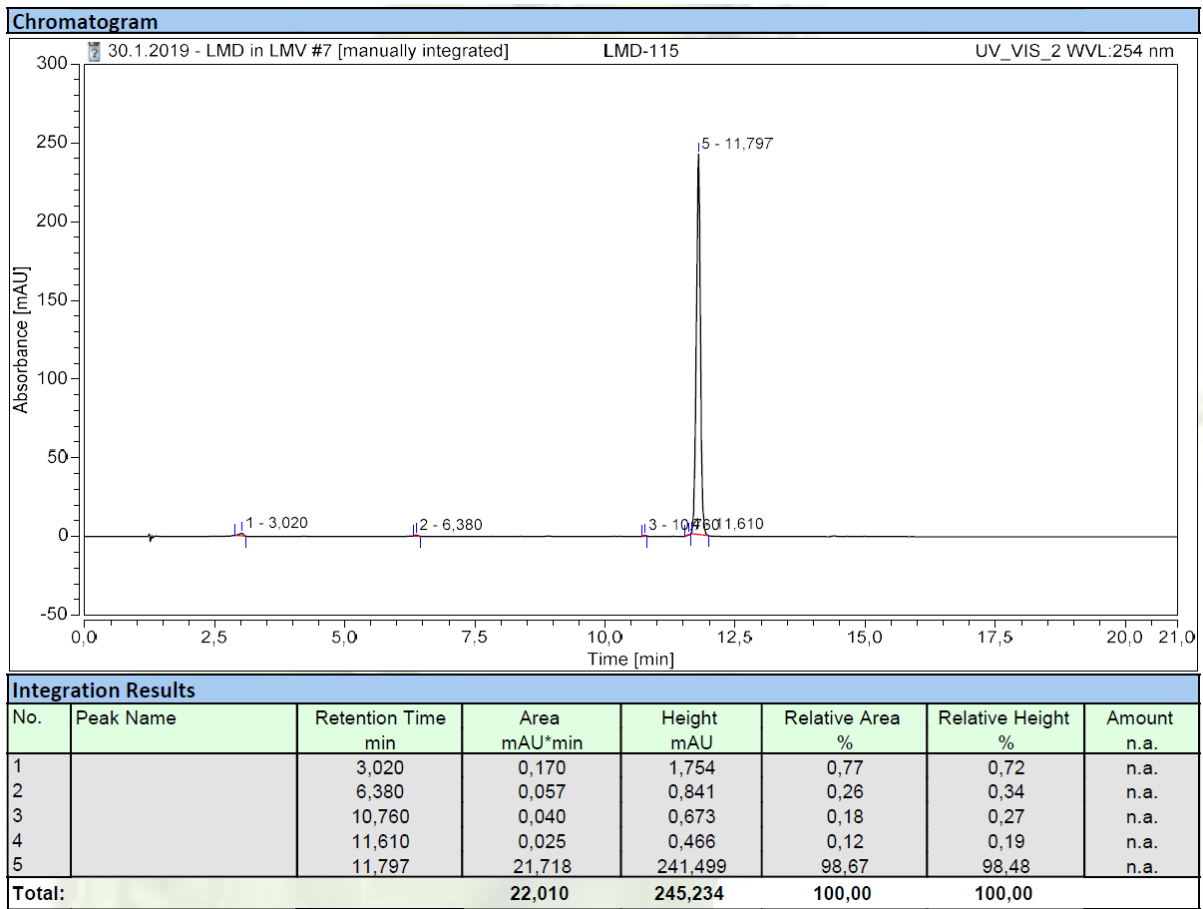

## Compound 10:

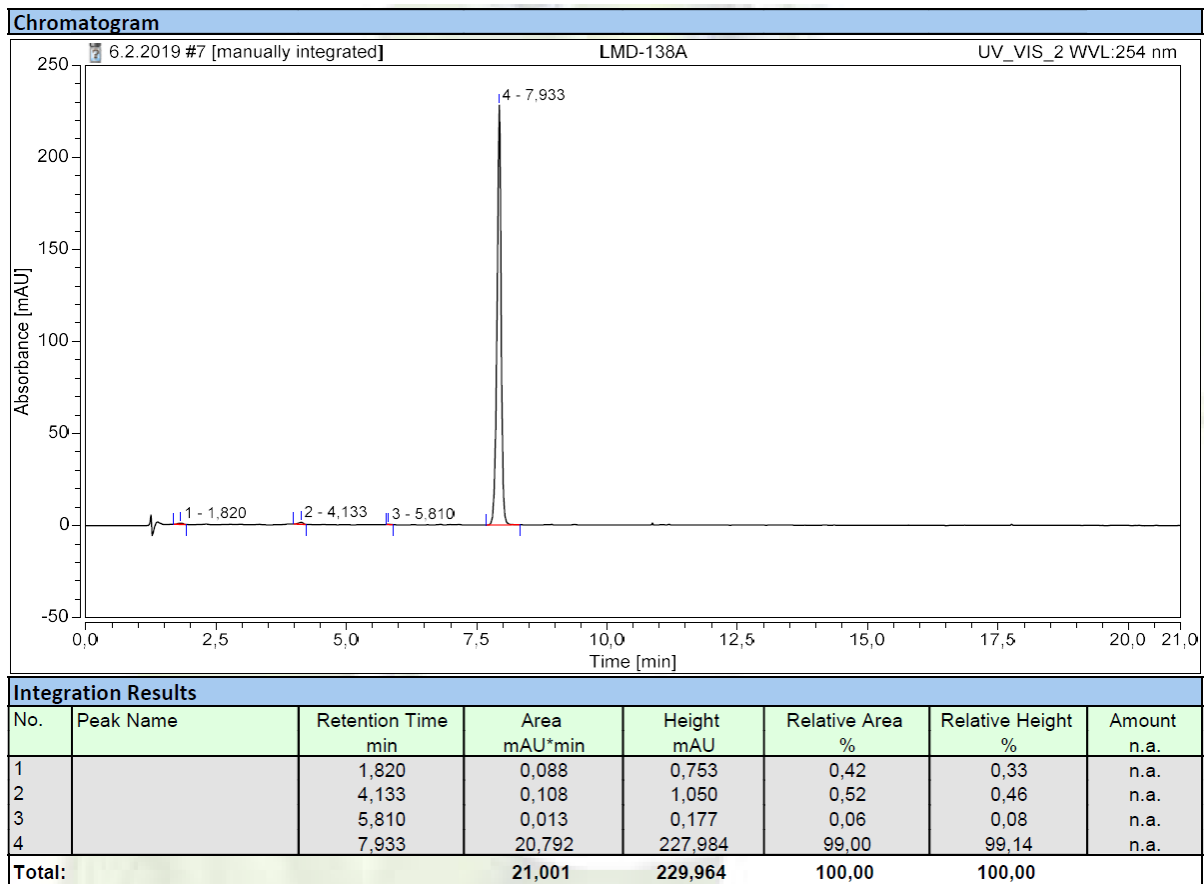

## Compound 11:

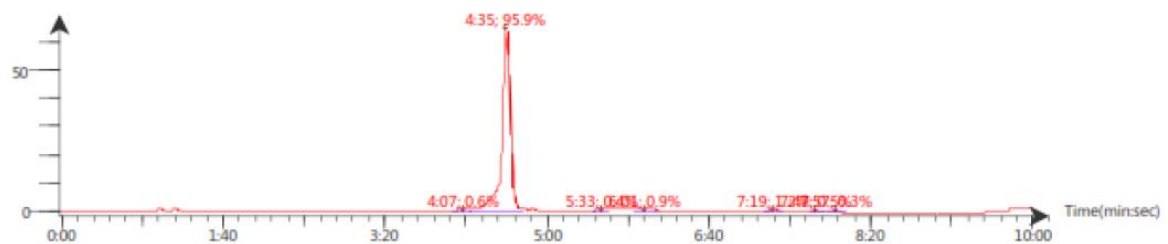

| Time (Peak Maximum M:S/Minutes) | Maximum Intensity (c/s) | Time (Peak Centroid M:S/Minutes) | Peak Area | % Peak Area | Peak Resolution | Label |
|---------------------------------|-------------------------|----------------------------------|-----------|-------------|-----------------|-------|
| 4:07.36                         | 3.9E-1                  | 4:07.74                          | 2.3E0     | 0.6         | 11.2            |       |
| 4:34.96                         | 6.4E1                   | 4:33.89                          | 3.9E2     | 95.9        | 5.0             |       |
| 5:33.36                         | 3.4E-1                  | 5:33.66                          | 1.5E0     | 0.4         | 4.5             |       |
| 5:42.56                         | 2.8E-1                  | 5:42.76                          | 1.1E0     | 0.3         | 3.9             |       |
| 6:00.96                         | 4.5E-1                  | 6:00.42                          | 3.7E0     | 0.9         | 8.0             |       |
| 7:18.96                         | 9.1E-1                  | 7:19.14                          | 4.8E0     | 1.2         | 5.0             |       |
| 7:46.56                         | 3.7E-1                  | 7:46.32                          | 1.9E0     | 0.5         | 5.3             |       |
| 7:57.36                         | 2.4E-1                  | 7:57.69                          | 1.4E0     | 0.3         | 5.7             |       |

## Compound 12:

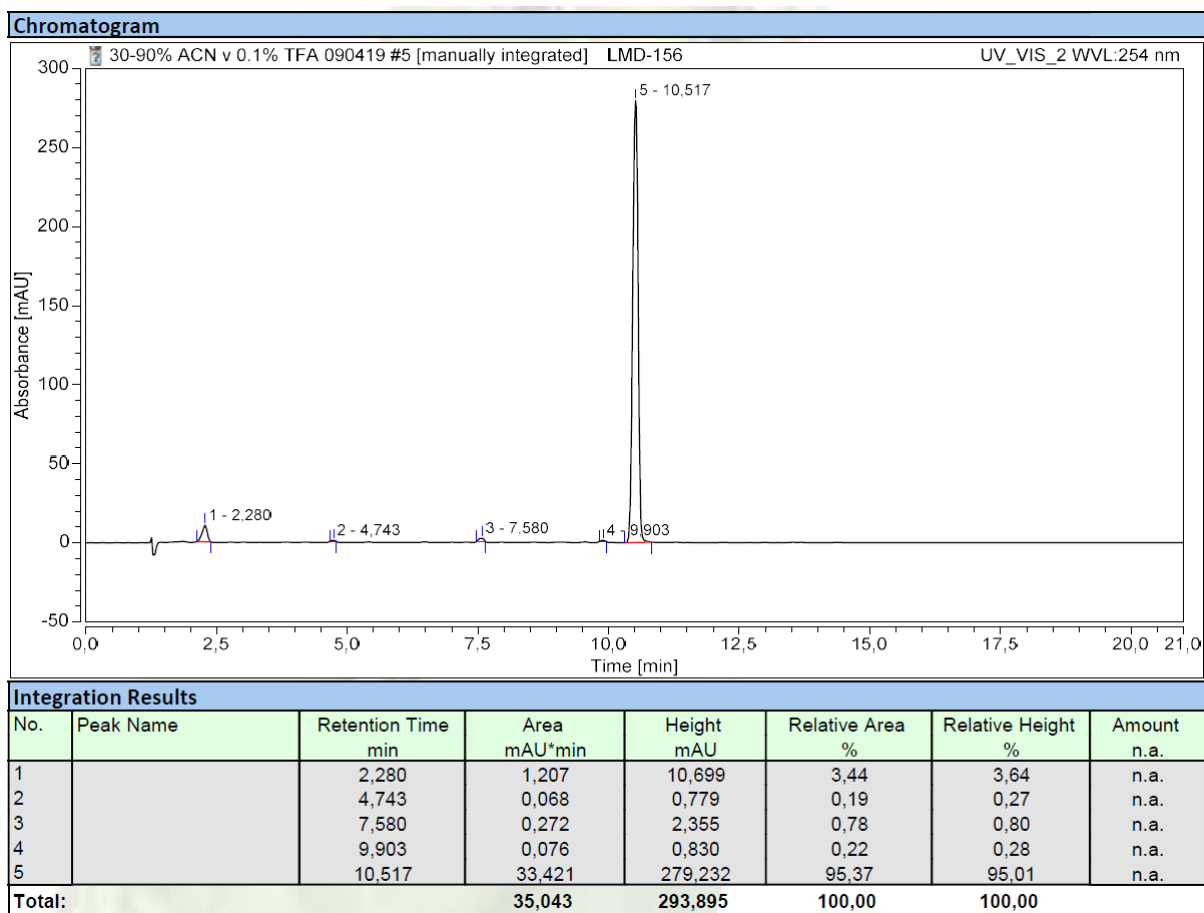

## Compound 14:

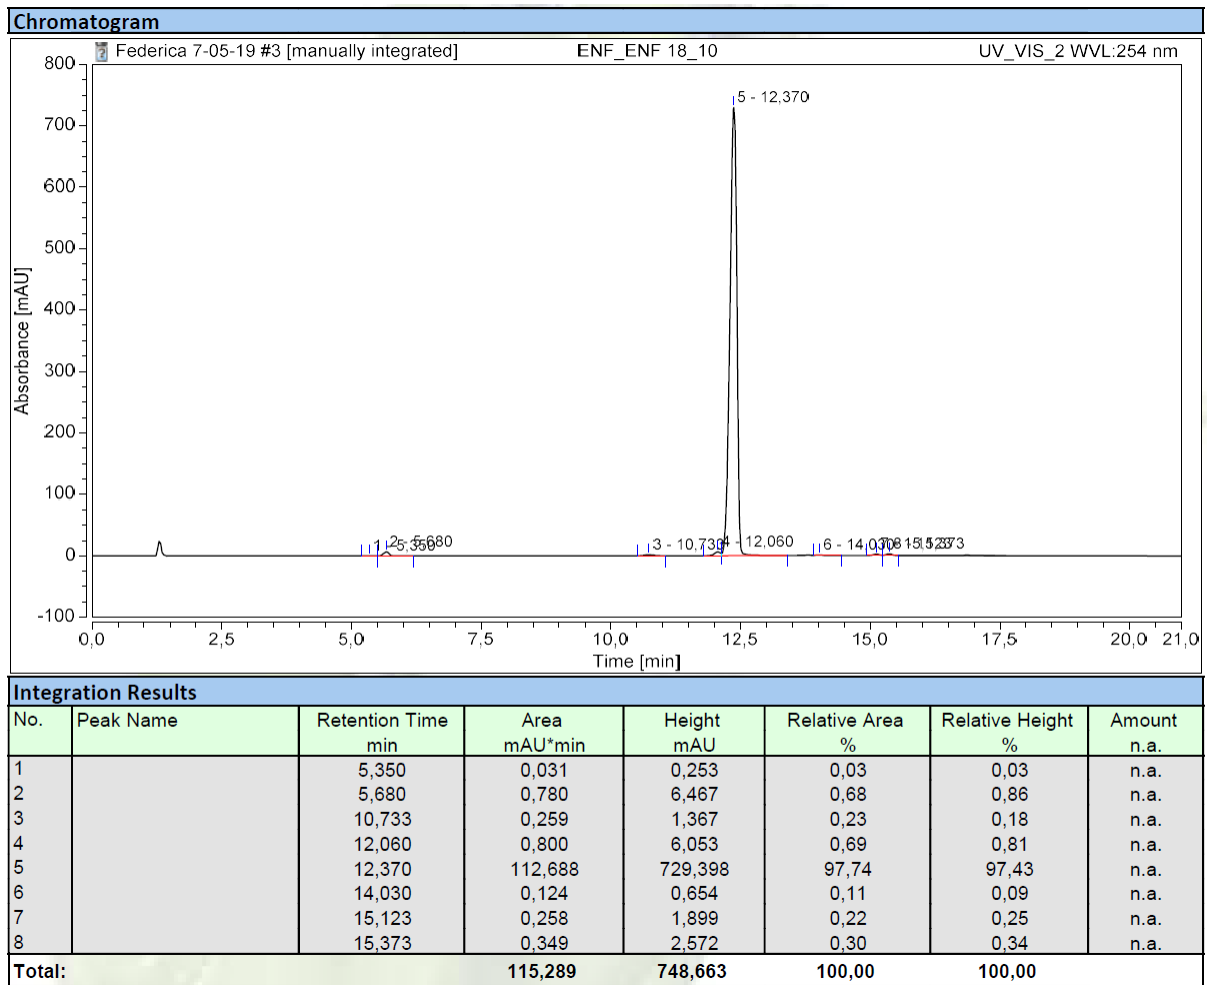

## Compound 17:

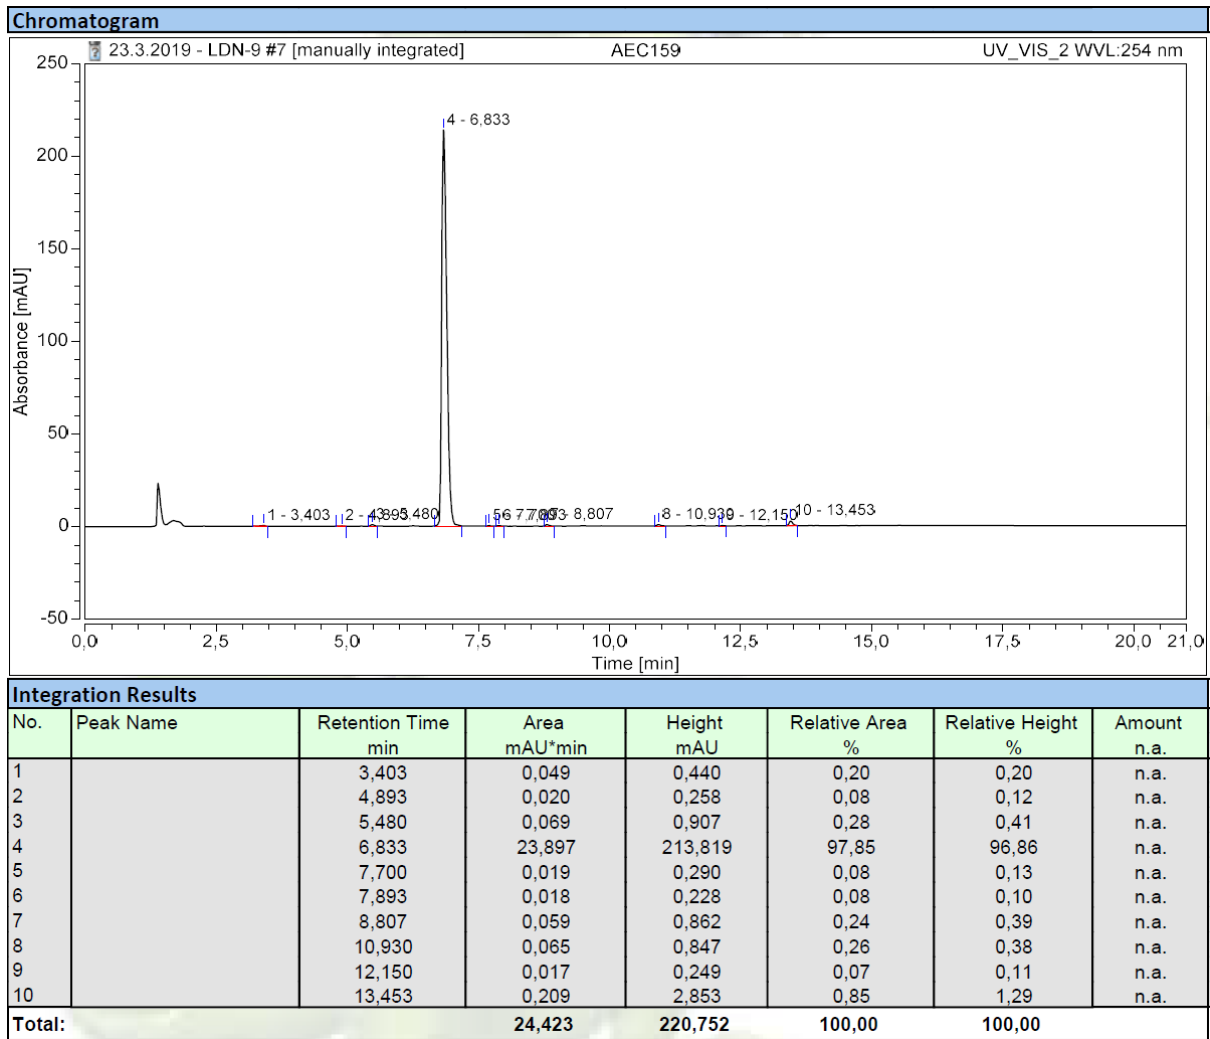

## Compound 18:

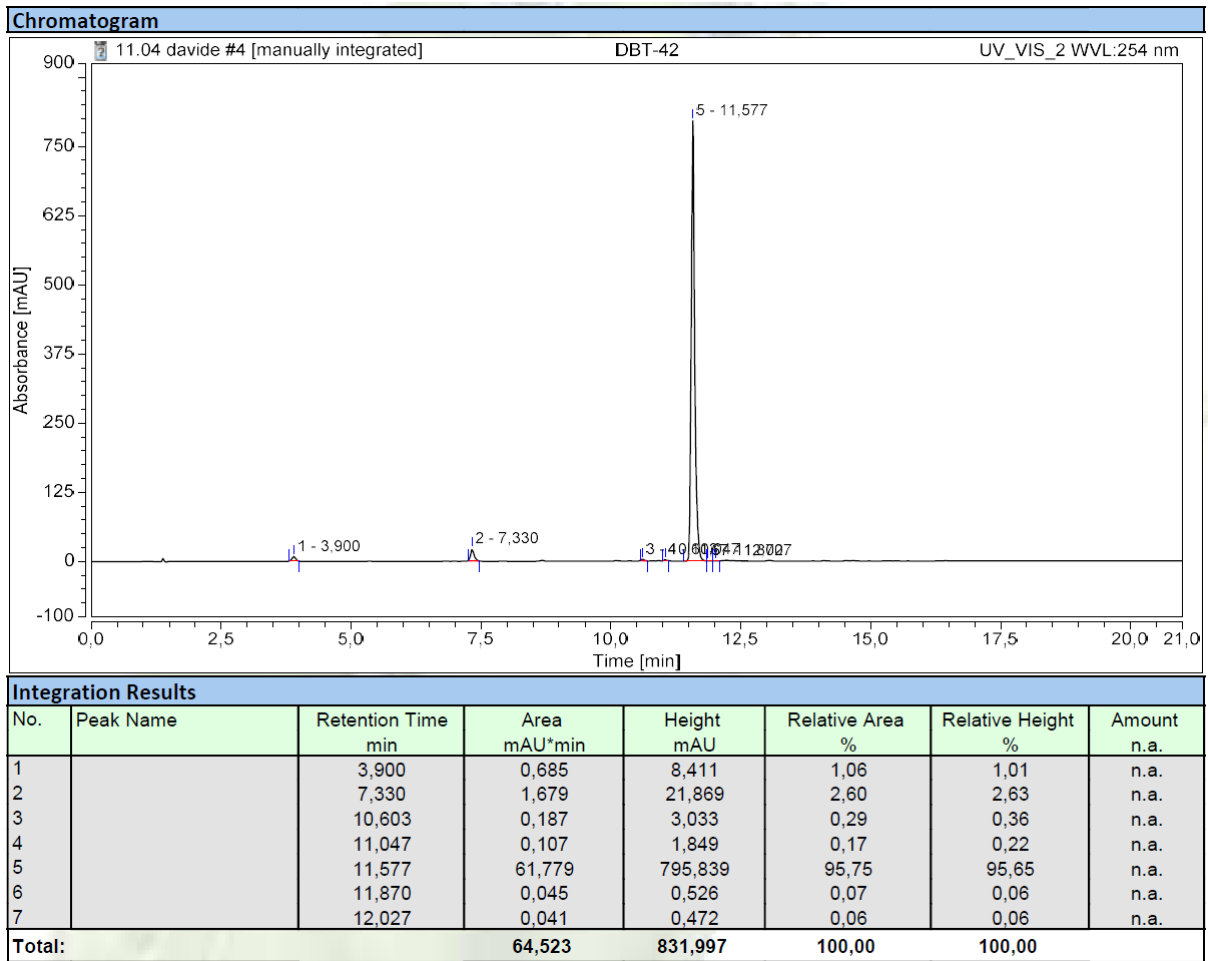

## Compound 19

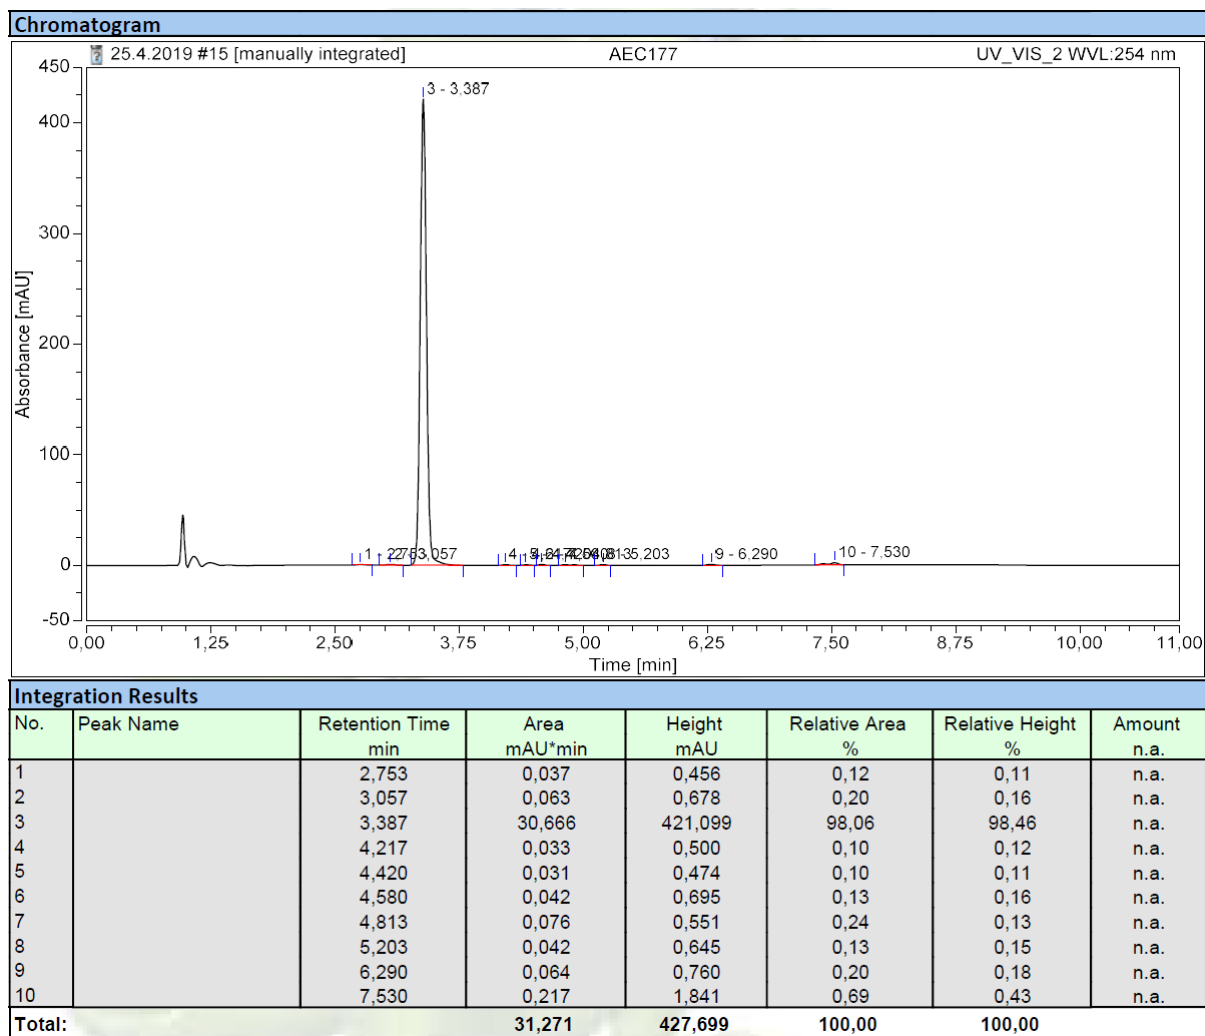

**Compound 20:**

Intensity VWD: Signal A, 254 nm  
ENF-55\_UV.datx 2019.07.05 10:12:24 ;

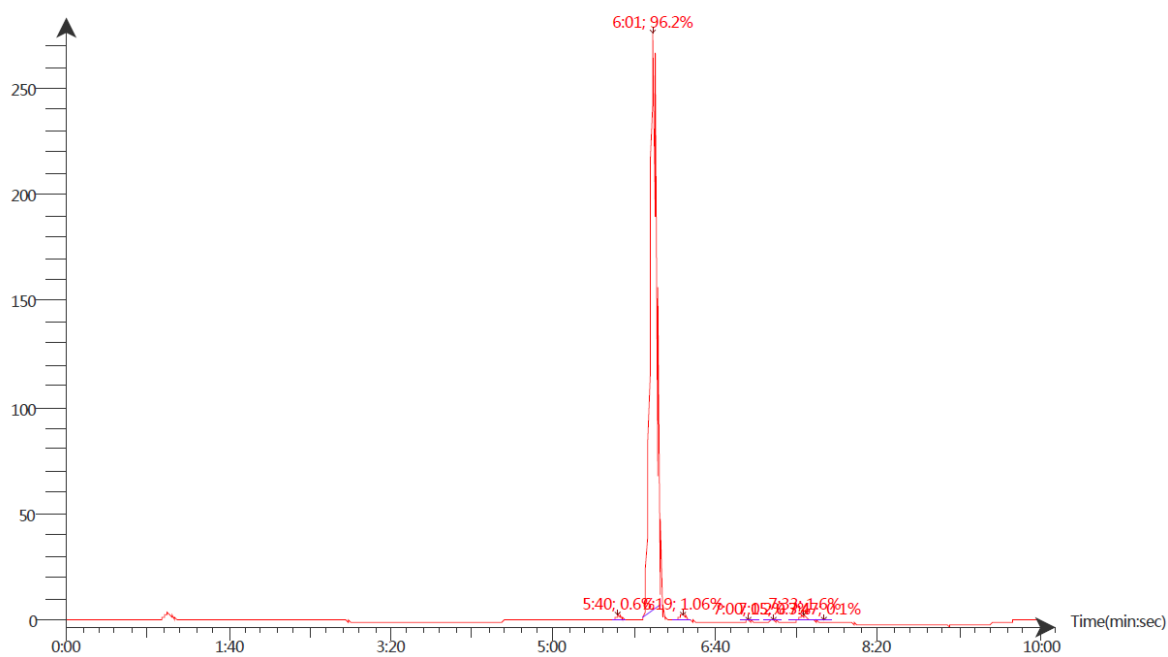**Compound 21:**

Intensity VWD: Signal A, 254 nm  
TMZ26\_UV.datx 2019.07.10 14:02:45 ;

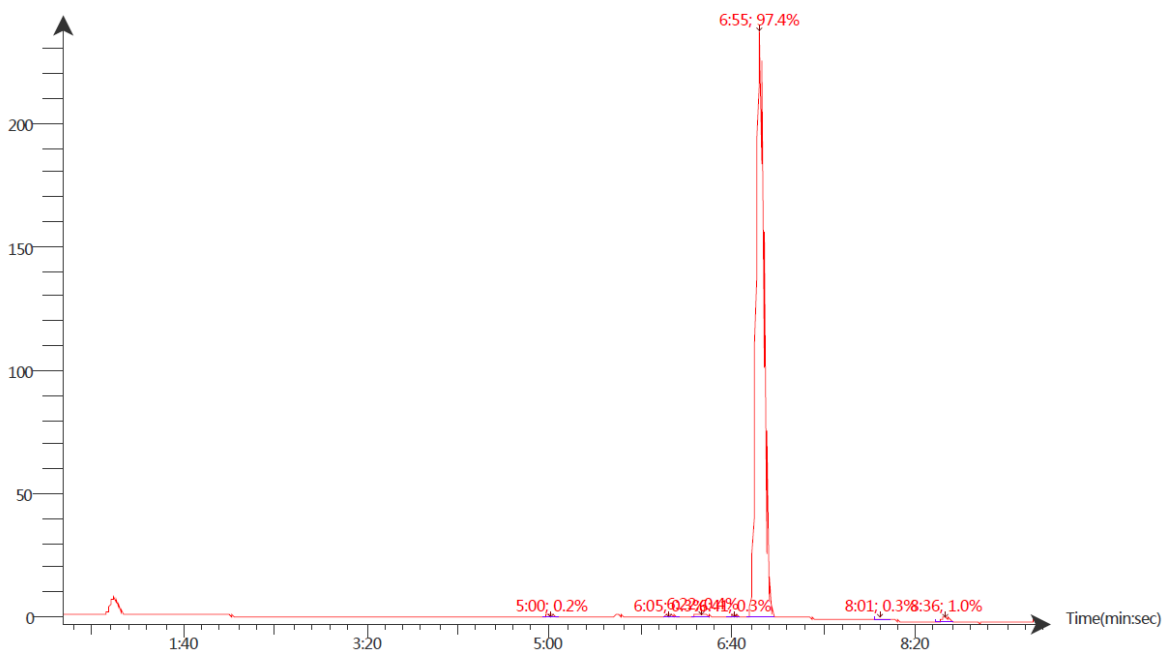



**Compound 22:**

VWD: Signal A, 254 nm  
 AEC360-on\_2\_UV.datx 2020.05.18 10:27:17;  
 Max: 9.7E2

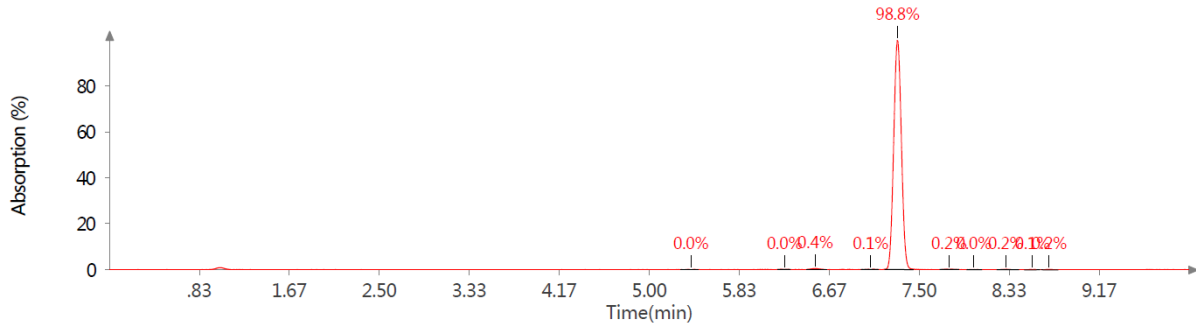

| Time (Peak Maximum M:S/Minutes) | Maximum Absorption (mAU) | Time (Peak Centroid M:S/Minutes) | Peak Area | % Peak Area | Peak Resolution | Label |
|---------------------------------|--------------------------|----------------------------------|-----------|-------------|-----------------|-------|
| 5.38                            | 4.4E-1                   | 5.39                             | 2.1E0     | 0.0         | 4.4             |       |
| 6.25                            | 4.3E-1                   | 6.25                             | 1.6E0     | 0.0         | 3.9             |       |
| 6.54                            | 3.7E0                    | 6.54                             | 1.8E1     | 0.4         | 4.6             |       |
| 7.05                            | 5.8E-1                   | 7.05                             | 2.7E0     | 0.1         | 4.6             |       |
| 7.30                            | 9.8E2                    | 7.30                             | 4.8E3     | 98.8        | 4.7             |       |
| 7.78                            | 1.6E0                    | 7.78                             | 7.8E0     | 0.2         | 4.7             |       |
| 8.01                            | 4.5E-1                   | 8.01                             | 2E0       | 0.0         | 4.7             |       |
| 8.30                            | 1.8E0                    | 8.30                             | 9.5E0     | 0.2         | 5.0             |       |
| 8.55                            | 1.6E0                    | 8.55                             | 6.9E0     | 0.1         | 4.3             |       |
| 8.70                            | 1.8E0                    | 8.70                             | 7.8E0     | 0.2         | 4.4             |       |

**Compound 23:**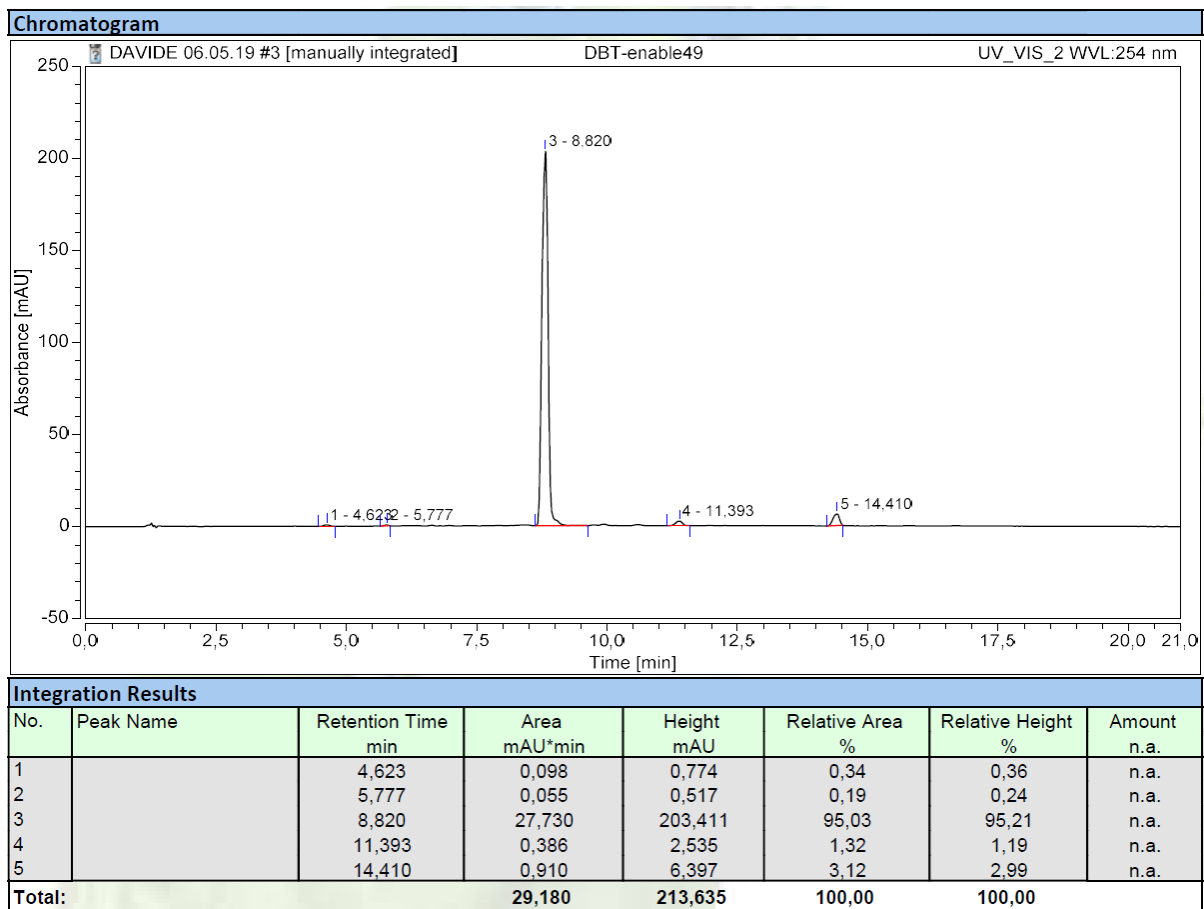

## Compound 24:

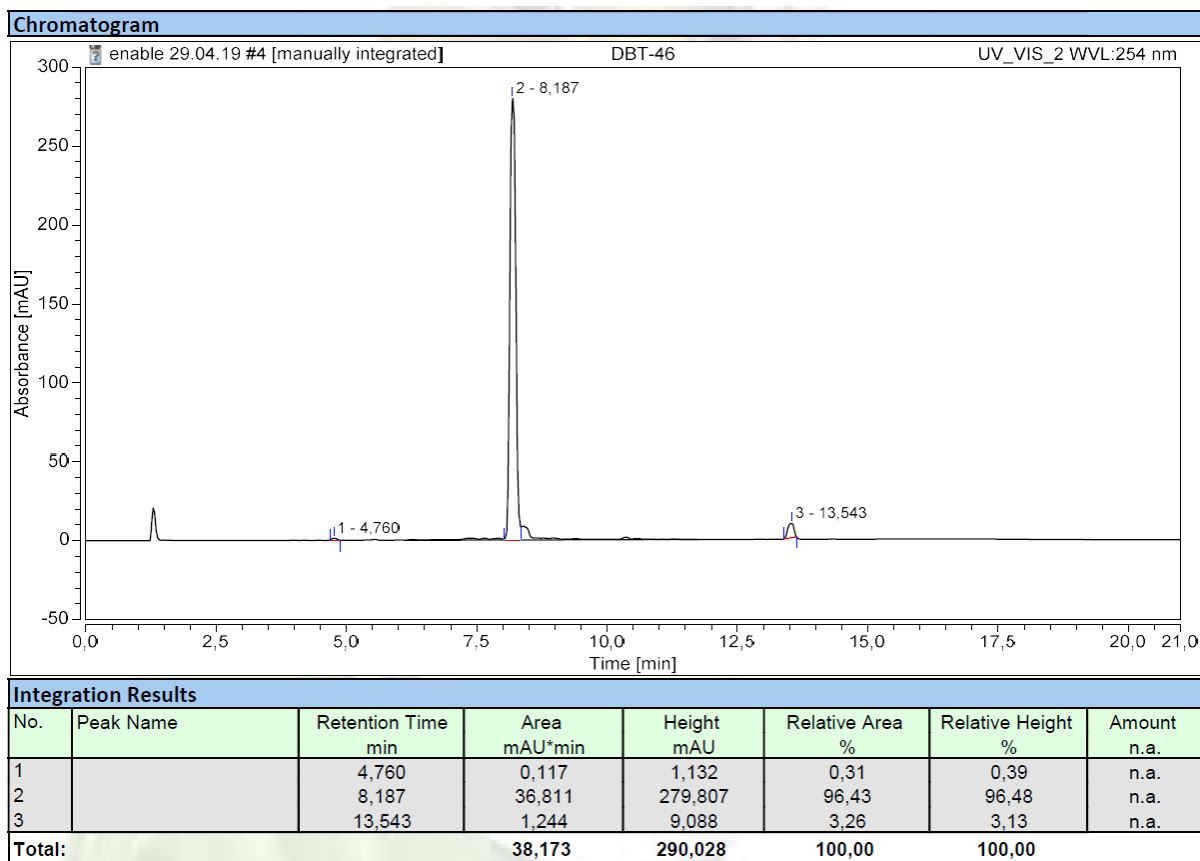

## Compound 25:

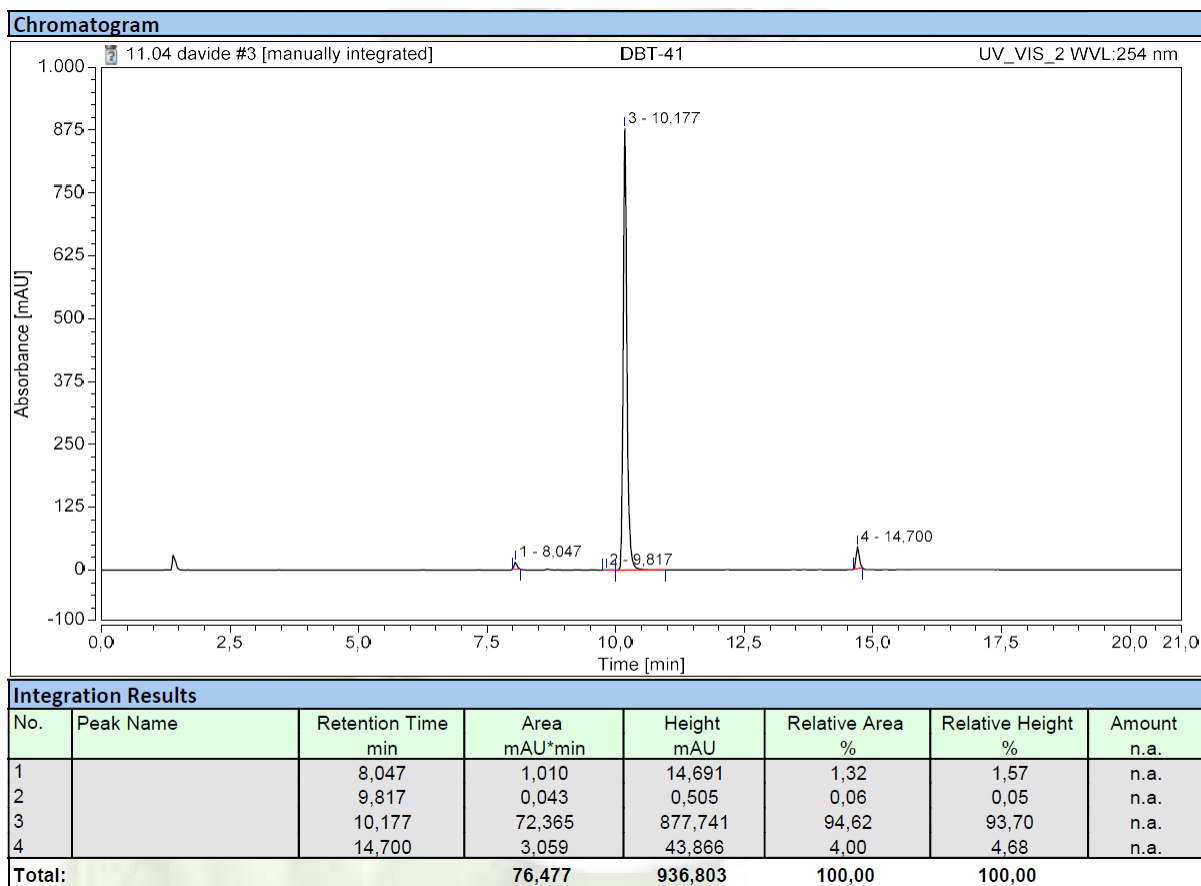

## Compound 26:

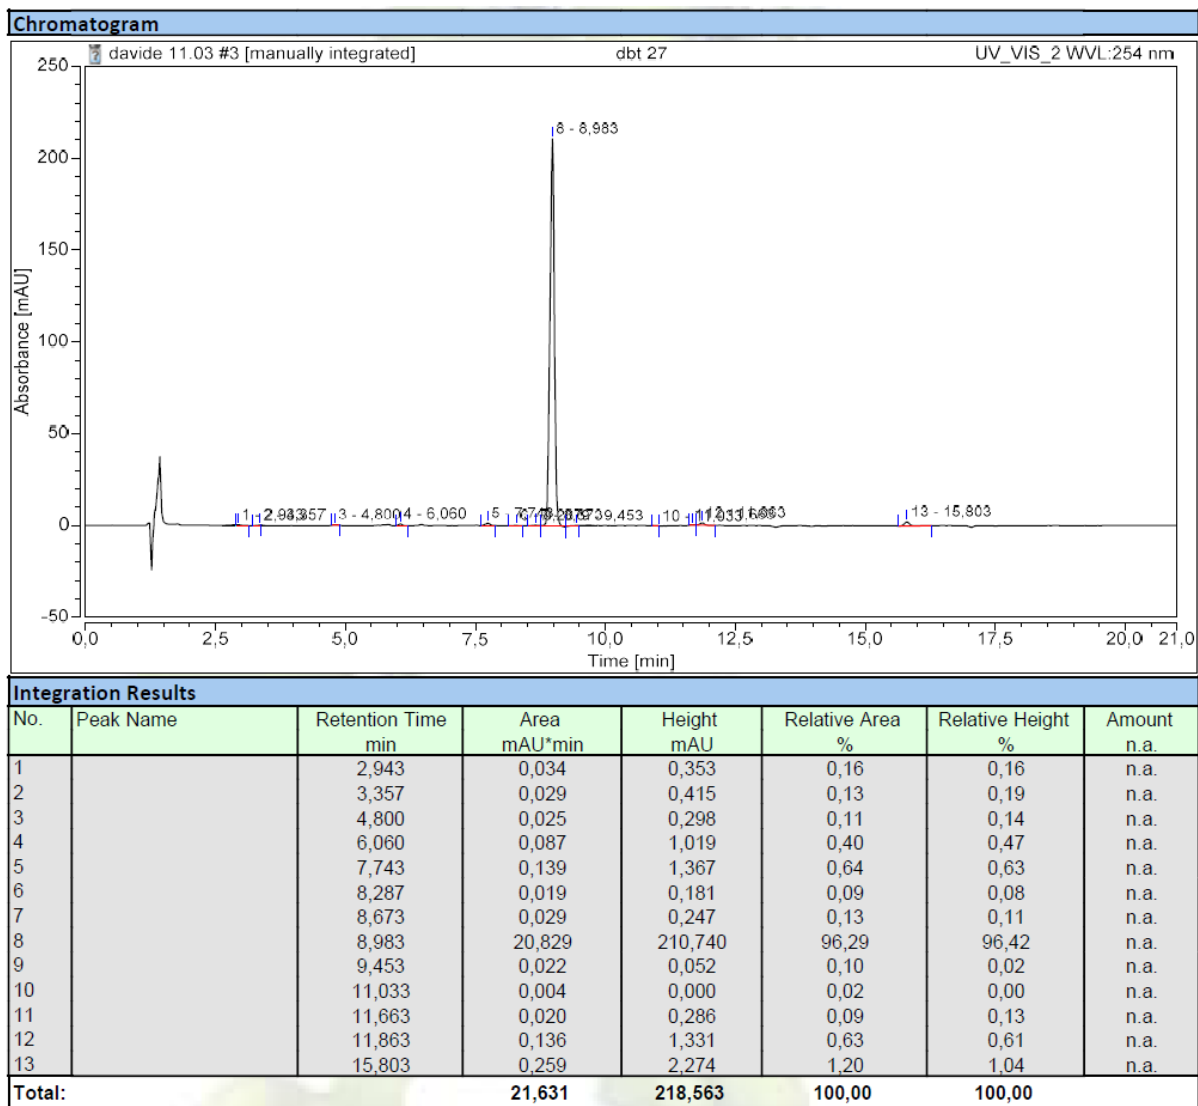

**Compound 27:**

VWD: Signal A, 254 nm  
 AEC290\_UV.datx 2019.11.08 12:17:25;  
 Max: 1.4E2

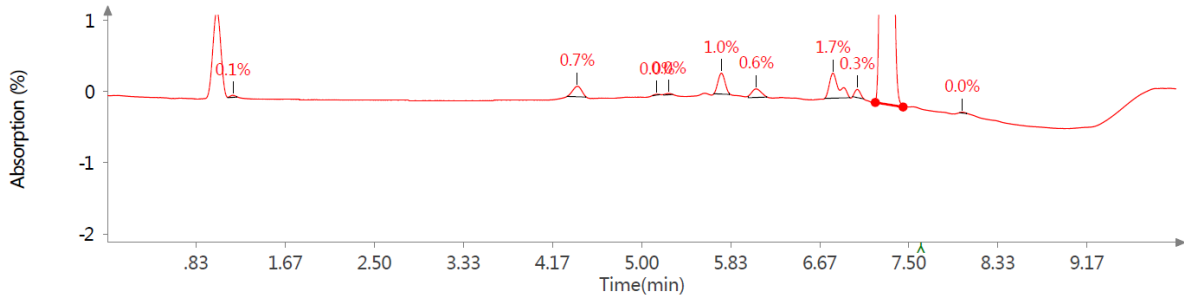

| Time (Peak Maximum M:S/Minutes) | Maximum Absorption (mAU) | Time (Peak Centroid M:S/Minutes) | Peak Area | % Peak Area | Peak Resolution | Label |
|---------------------------------|--------------------------|----------------------------------|-----------|-------------|-----------------|-------|
| 1.17                            | 1.6E-1                   | 1.18                             | 5.2E-1    | 0.1         | 3.3             |       |
| 4.40                            | 8.4E-1                   | 4.40                             | 4.8E0     | 0.7         | 5.7             |       |
| 5.15                            | 5.3E-2                   | 5.14                             | 1.7E-1    | 0.0         | 4.0             |       |
| 5.25                            | 9.8E-2                   | 5.25                             | 3.5E-1    | 0.0         | 3.6             |       |
| 5.75                            | 1.7E0                    | 5.75                             | 7.5E0     | 1.0         | 4.5             |       |
| 6.07                            | 6.8E-1                   | 6.07                             | 4.1E0     | 0.6         | 6.2             |       |
| 6.79                            | 2E0                      | 6.79                             | 1.3E1     | 1.7         | 4.6             |       |
| 7.02                            | 6.5E-1                   | 7.02                             | 2.3E0     | 0.3         | 3.6             |       |
| 7.29                            | 1.4E2                    | 7.29                             | 6.9E2     | 95.5        | 4.7             |       |
| 8.00                            | 6.3E-2                   | 8.00                             | 1.9E-1    | 0.0         | 3.6             |       |

**Compound 28:**

Intensity VWD: Signal A, 254 nm  
 LMD-195\_UV.datx 2019.08.09 12:44:49 ;

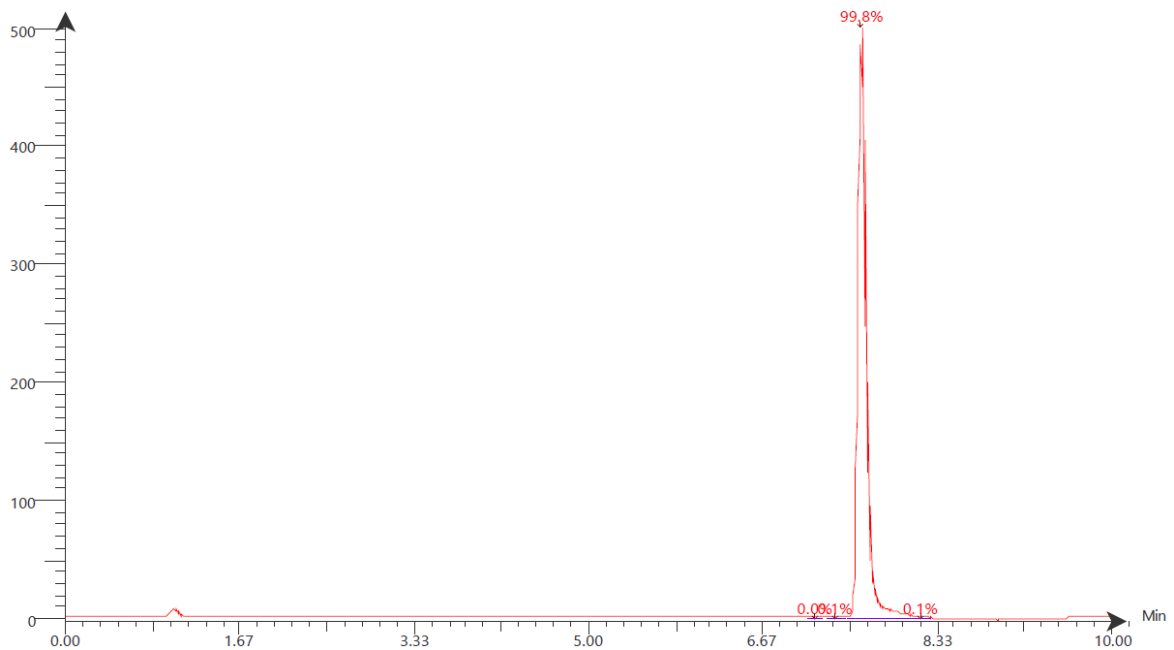

**Compound 29:**

VWD: Signal A, 254 nm  
 AEC200\_UV.datx 2019.06.06 15:33:14 ;  
 Intensity Max: 1.2E2

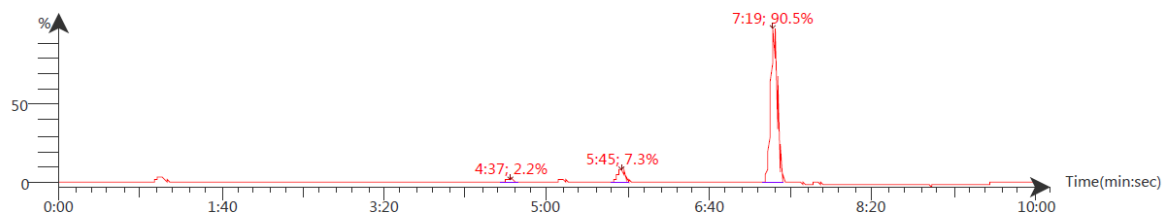

| Time (Peak Maximum M:S/Minutes) | Maximum Intensity (c/s) | Time (Peak Centroid M:S/Minutes) | Peak Area | % Peak Area | Peak Resolution | Label |
|---------------------------------|-------------------------|----------------------------------|-----------|-------------|-----------------|-------|
| 4:36.64                         | 2.9E0                   | 4:36.86                          | 1.4E1     | 2.2         | 4.8             |       |
| 5:45.44                         | 9.7E0                   | 5:45.30                          | 4.7E1     | 7.3         | 4.6             |       |
| 7:19.44                         | 1.2E2                   | 7:19.35                          | 5.8E2     | 90.5        | 4.7             |       |

**Compound 30:**

VWD: Signal A, 254 nm  
 END 83\_UV.datx 2019.11.28 13:52:40;  
 Max: 1.7E2

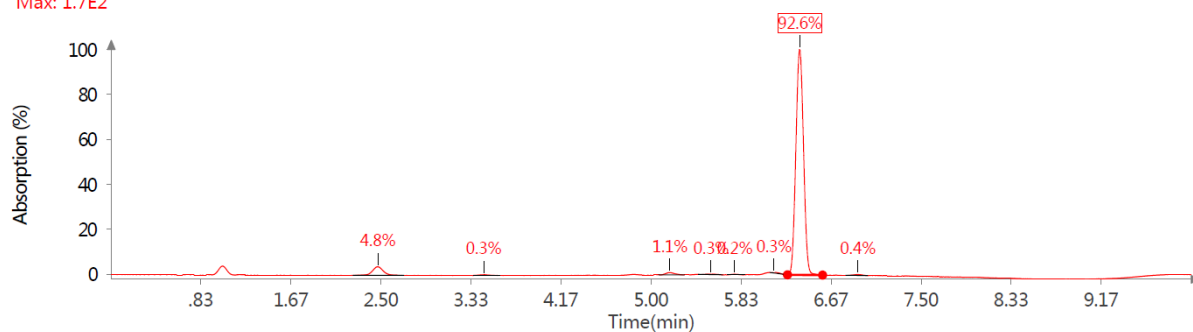

| Time (Peak Maximum M:S/Minutes) | Maximum Absorption (mAU) | Time (Peak Centroid M:S/Minutes) | Peak Area | % Peak Area | Peak Resolution | Label |
|---------------------------------|--------------------------|----------------------------------|-----------|-------------|-----------------|-------|
| 2.47                            | 6.3E0                    | 2.47                             | 4.3E1     | 4.8         | 6.1             |       |
| 3.45                            | 4.5E-1                   | 3.45                             | 2.8E0     | 0.3         | 5.9             |       |
| 5.17                            | 1.7E0                    | 5.17                             | 9.7E0     | 1.1         | 5.4             |       |
| 5.56                            | 3.5E-1                   | 5.56                             | 2.3E0     | 0.3         | 13.6            |       |
| 5.77                            | 4E-1                     | 5.77                             | 1.9E0     | 0.2         | 4.7             |       |
| 6.14                            | 4.4E-1                   | 6.14                             | 2.5E0     | 0.3         | 7.2             |       |
| 6.37                            | 1.7E2                    | 6.38                             | 8.2E2     | 92.6        | 4.7             |       |
| 6.91                            | 6.8E-1                   | 6.91                             | 3.4E0     | 0.4         | 4.8             |       |

**Compound 31:**

Intensity VWD: Signal A, 254 nm  
END 31\_UV.datx 2019.06.06 12:31:01 ;

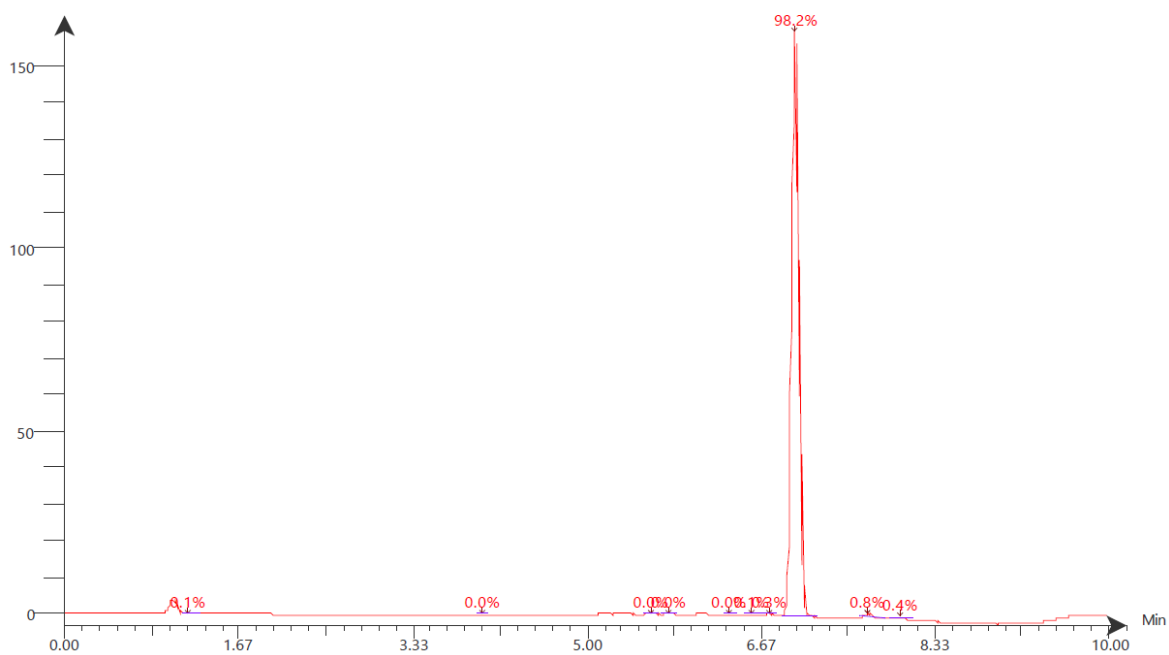**Compound 32:**

Intensity VWD: Signal A, 254 nm  
ENF-54\_2\_UV.datx 2019.07.04 11:34:21 ;

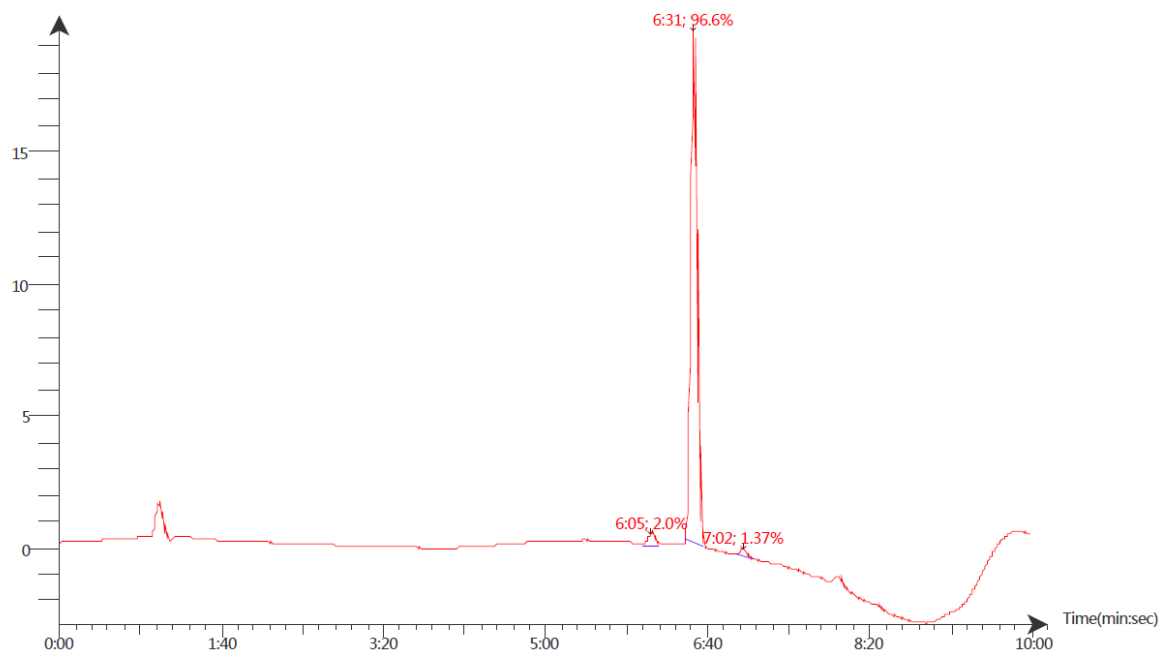

**Compound 33:**

VWD: Signal A, 254 nm  
 END 33\_UV.dtx 2019.06.06 15:22:29 ;  
 Max: 1E2

Intensity

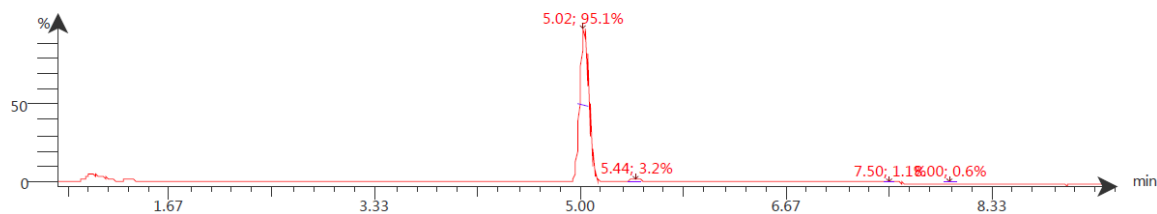

| Time (Peak Maximum M:S/Minutes) | Maximum Intensity (c/s) | Time (Peak Centroid M:S/Minutes) | Peak Area | % Peak Area | Peak Resolution | Label |
|---------------------------------|-------------------------|----------------------------------|-----------|-------------|-----------------|-------|
| 5.02                            | 5.2E1                   | 5.02                             | 1.5E2     | 95.1        | 3.1             |       |
| 5.44                            | 1.4E0                   | 5.44                             | 5.2E0     | 3.2         | 3.8             |       |
| 7.50                            | 5.4E-1                  | 7.50                             | 1.8E0     | 1.1         | 3.5             |       |
| 8.00                            | 2.5E-1                  | 8.00                             | 1E0       | 0.6         | 4.3             |       |

**Compound 34:**

VWD: Signal A, 254 nm  
 AEC259-triturMeOH\_UV.dtx 2019.08.30 12:50:19 ;

Intensity

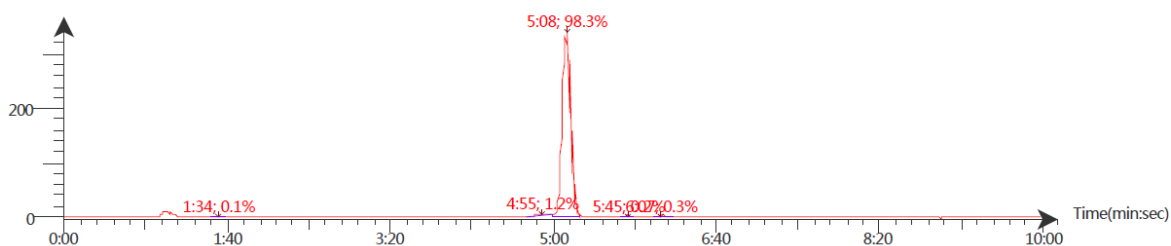

| Time (Peak Maximum M:S/Minutes) | Maximum Intensity (c/s) | Time (Peak Centroid M:S/Minutes) | Peak Area | % Peak Area | Peak Resolution | Label |
|---------------------------------|-------------------------|----------------------------------|-----------|-------------|-----------------|-------|
| 1:34.13                         | 3.2E-1                  | 1:33.72                          | 1.7E0     | 0.1         | 5.6             |       |
| 4:55.33                         | 3E0                     | 4:53.46                          | 2.5E1     | 1.2         | 7.8             |       |
| 5:07.73                         | 3.4E2                   | 5:07.69                          | 2E3       | 98.3        | 5.5             |       |
| 5:45.33                         | 7.3E-1                  | 5:45.29                          | 3.3E0     | 0.2         | 4.5             |       |
| 6:06.93                         | 9.4E-1                  | 6:06.31                          | 5.9E0     | 0.3         | 6.2             |       |



**Compound 35:**

Intensity VWD: Signal A, 254 nm  
EMS-ENF71\_UV.datx 2019.09.06 10:42:35 ;

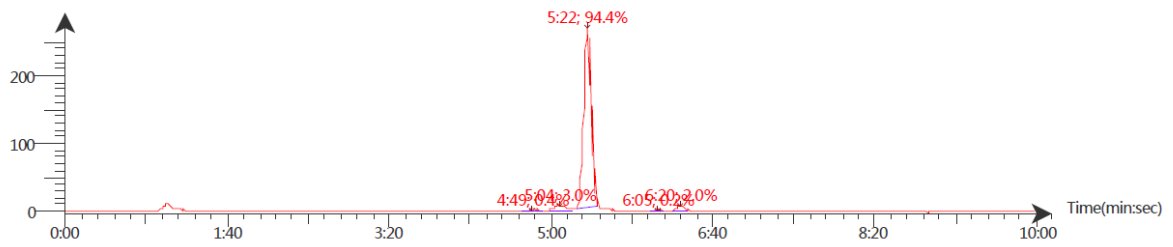

| Time (Peak Maximum M:S/Minutes) | Maximum Intensity (c/s) | Time (Peak Centroid M:S/Minutes) | Peak Area | % Peak Area | Peak Resolution | Label |
|---------------------------------|-------------------------|----------------------------------|-----------|-------------|-----------------|-------|
| 4:48.89                         | 1.1E0                   | 4:48.96                          | 6.3E0     | 0.4         | 5.7             |       |
| 5:04.09                         | 6.9E0                   | 5:05.46                          | 4.5E1     | 3.0         | 6.2             |       |
| 5:22.09                         | 2.7E2                   | 5:22.22                          | 1.4E3     | 94.4        | 5.2             |       |
| 6:05.29                         | 6.3E-1                  | 6:05.42                          | 3E0       | 0.2         | 4.8             |       |
| 6:20.09                         | 6.5E0                   | 6:19.99                          | 3.1E1     | 2.0         | 4.6             |       |

**Compound 36:**

Intensity VWD: Signal A, 254 nm  
ENF 62\_UV.datx 2019.07.26 12:09:12 ;

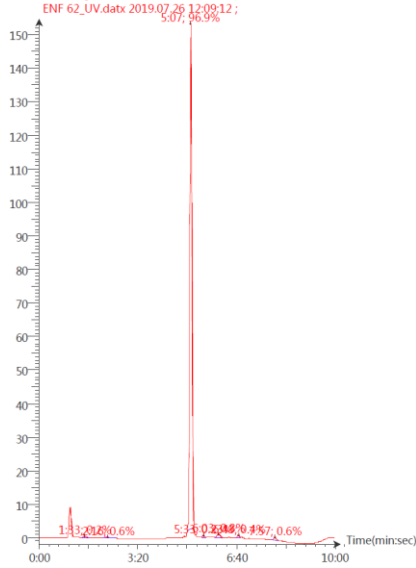**Compound 37:**

Intensity VWD: Signal A, 254 nm  
LMD-211\_UV.datx 2019.09.03 10:46:23 ;

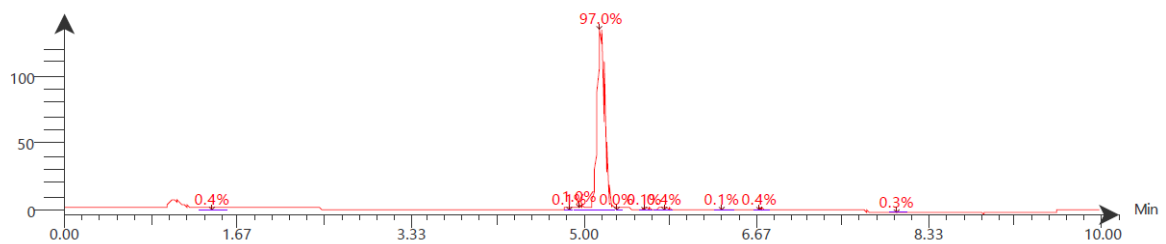

**Compound 38:**

Intensity VWD: Signal A, 254 nm  
END 48\_UV.datx 2019.07.31 14:14:16;

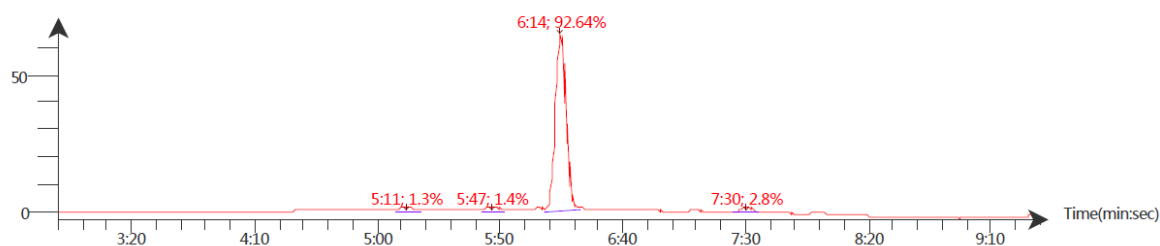**Compound 39:**

Intensity VWD: Signal A, 254 nm  
END 32-2 EA\_UV.datx 2019.07.19 15:15:11;

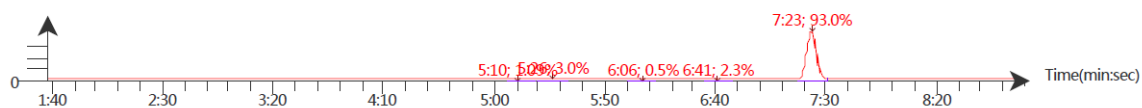**Compound 40:**

Intensity VWD: Signal A, 254 nm  
EMS-44-2\_UV.datx 2019.09.05 08:31:42;

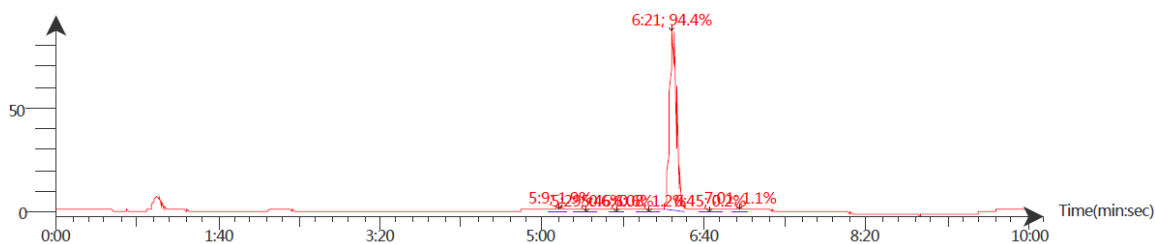

| Time (Peak Maximum M:S/Minutes) | Maximum Intensity (c/s) | Time (Peak Centroid M:S/Minutes) | Peak Area | % Peak Area | Peak Resolution | Label |
|---------------------------------|-------------------------|----------------------------------|-----------|-------------|-----------------|-------|
| 5:9.41                          | 1.6E0                   | 5:9.47                           | 8.3E0     | 1.9         | 4.8             |       |
| 5:29.41                         | 3.3E-1                  | 5:27.71                          | 2.6E0     | 0.6         | 6.0             |       |
| 5:45.81                         | 5.7E-1                  | 5:45.99                          | 2.6E0     | 0.6         | 4.6             |       |
| 6:08.21                         | 6.4E-1                  | 6:06.41                          | 5.2E0     | 1.2         | 8.2             |       |
| 6:20.61                         | 8.6E1                   | 6:20.49                          | 4.2E2     | 94.4        | 4.7             |       |
| 6:44.61                         | 1.4E-1                  | 6:43.41                          | 1E0       | 0.2         | 8.4             |       |
| 7:01.01                         | 1.1E0                   | 7:01.18                          | 5.1E0     | 1.1         | 4.5             |       |

**Compound 41:**

VWD: Signal A, 254 nm  
 LMD-222\_UV.datx 2019.09.27 11:12:57 ;

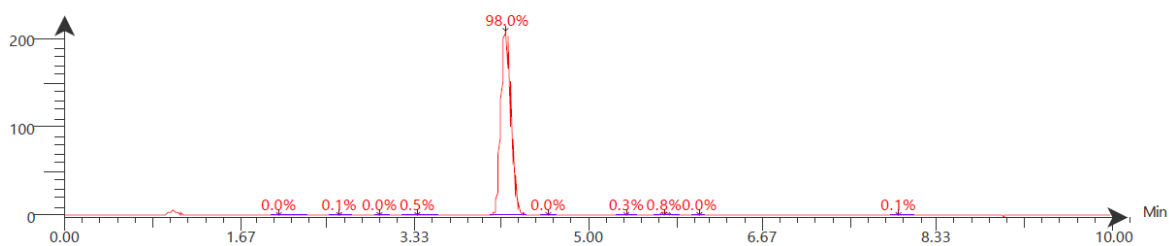

**Compound 42:**

VWD: Signal A, 254 nm  
 LMD-237\_UV.datx 2019.11.13 11:27:56;  
 Max: 2.4E1

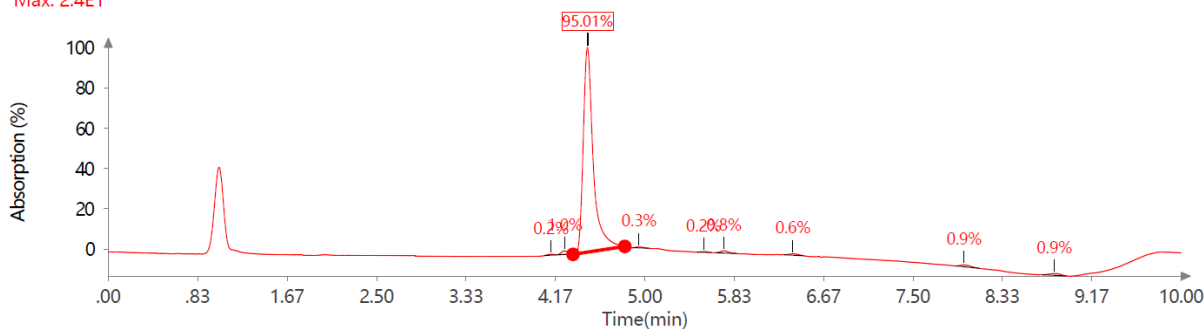

**Compound 43:**

VWD: Signal A, 254 nm  
 LMD-219\_UV.datx 2019.09.24 13:23:28 ;

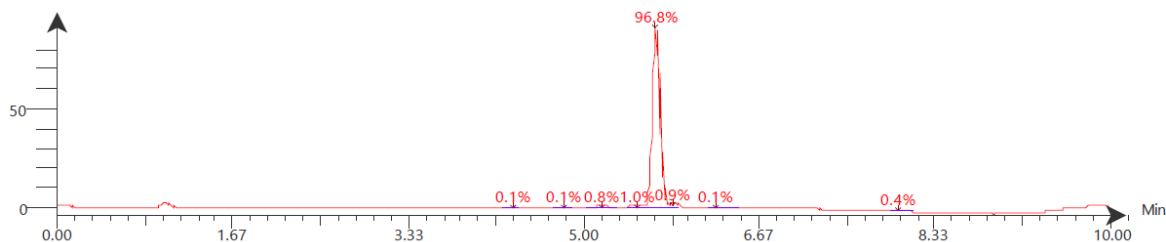

**Compound 44:**

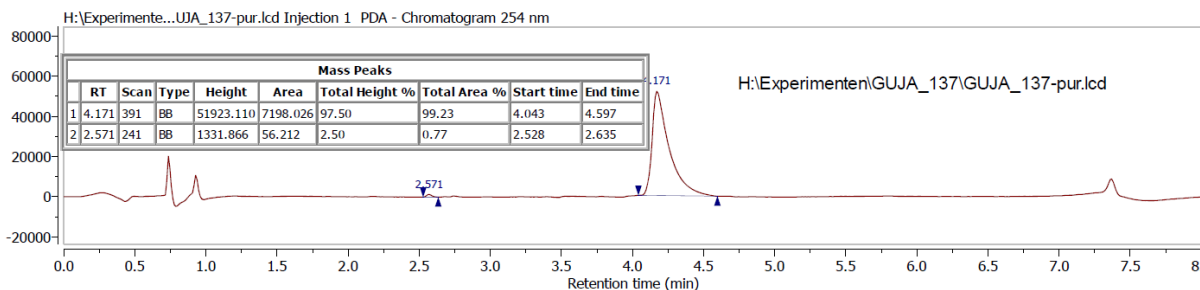

**Compound 45:**

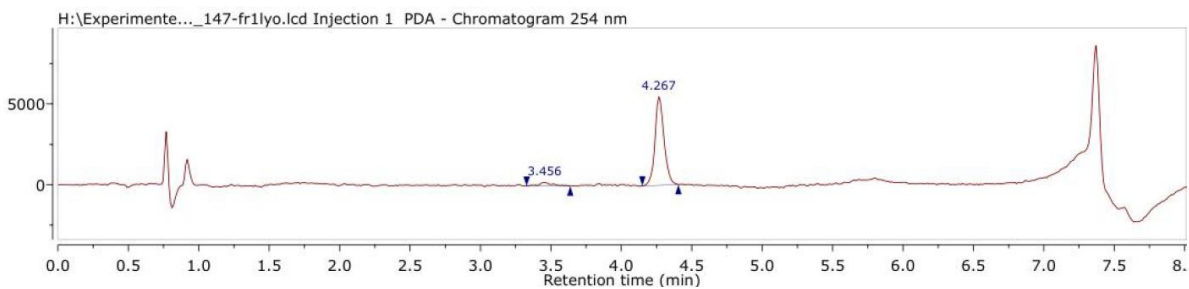

**Compound 46:**

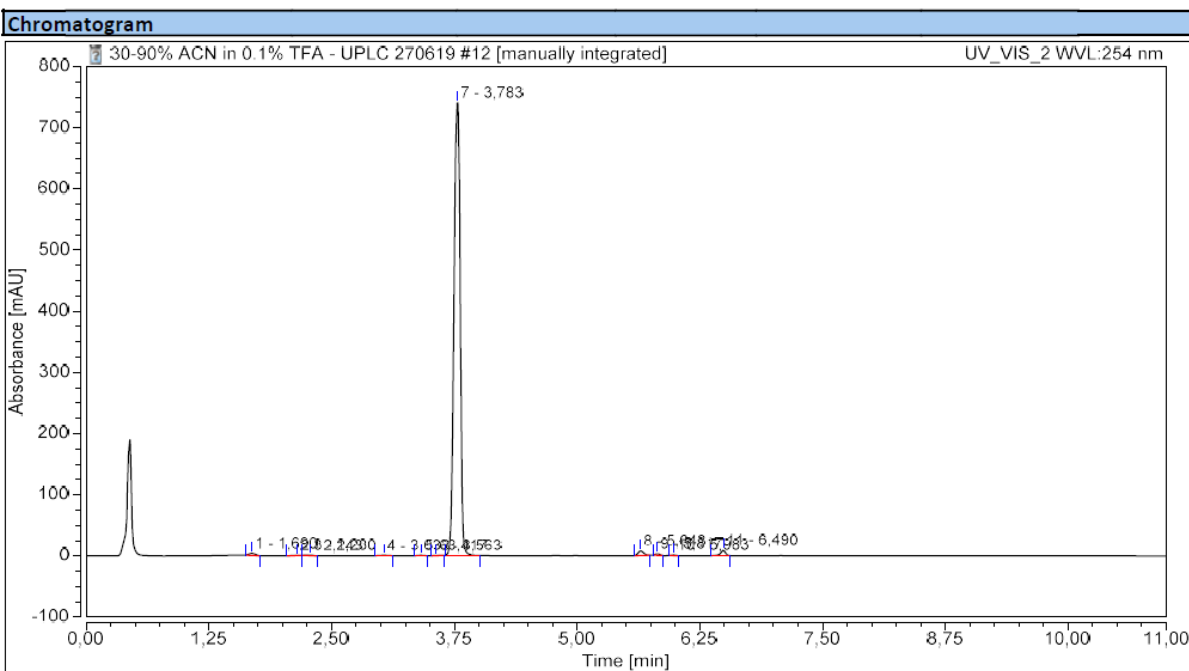

| Integration Results |           |                       |                 |                |                    |                      |                |
|---------------------|-----------|-----------------------|-----------------|----------------|--------------------|----------------------|----------------|
| No.                 | Peak Name | Retention Time<br>min | Area<br>mAU*min | Height<br>mAU  | Relative Area<br>% | Relative Height<br>% | Amount<br>n.a. |
| 1                   |           | 1,690                 | 0,237           | 3,229          | 0,42               | 0,42                 | n.a.           |
| 2                   |           | 2,143                 | 0,020           | 0,202          | 0,03               | 0,03                 | n.a.           |
| 3                   |           | 2,280                 | 0,071           | 0,687          | 0,13               | 0,09                 | n.a.           |
| 4                   |           | 3,033                 | 0,070           | 0,678          | 0,13               | 0,09                 | n.a.           |
| 5                   |           | 3,417                 | 0,051           | 0,690          | 0,09               | 0,09                 | n.a.           |
| 6                   |           | 3,563                 | 0,022           | 0,374          | 0,04               | 0,05                 | n.a.           |
| 7                   |           | 3,783                 | 54,413          | 740,369        | 97,07              | 96,57                | n.a.           |
| 8                   |           | 5,643                 | 0,496           | 7,660          | 0,88               | 1,00                 | n.a.           |
| 9                   |           | 5,817                 | 0,124           | 2,530          | 0,22               | 0,33                 | n.a.           |
| 10                  |           | 5,983                 | 0,052           | 1,140          | 0,09               | 0,15                 | n.a.           |
| 11                  |           | 6,490                 | 0,501           | 9,091          | 0,89               | 1,19                 | n.a.           |
| <b>Total:</b>       |           |                       | <b>56,056</b>   | <b>766,650</b> | <b>100,00</b>      | <b>100,00</b>        |                |

**Compound 47:**

Intensity WWD: Signal A, 254 nm  
EMS 12\_UV.datx 2019.07.04 11:51:34 ;

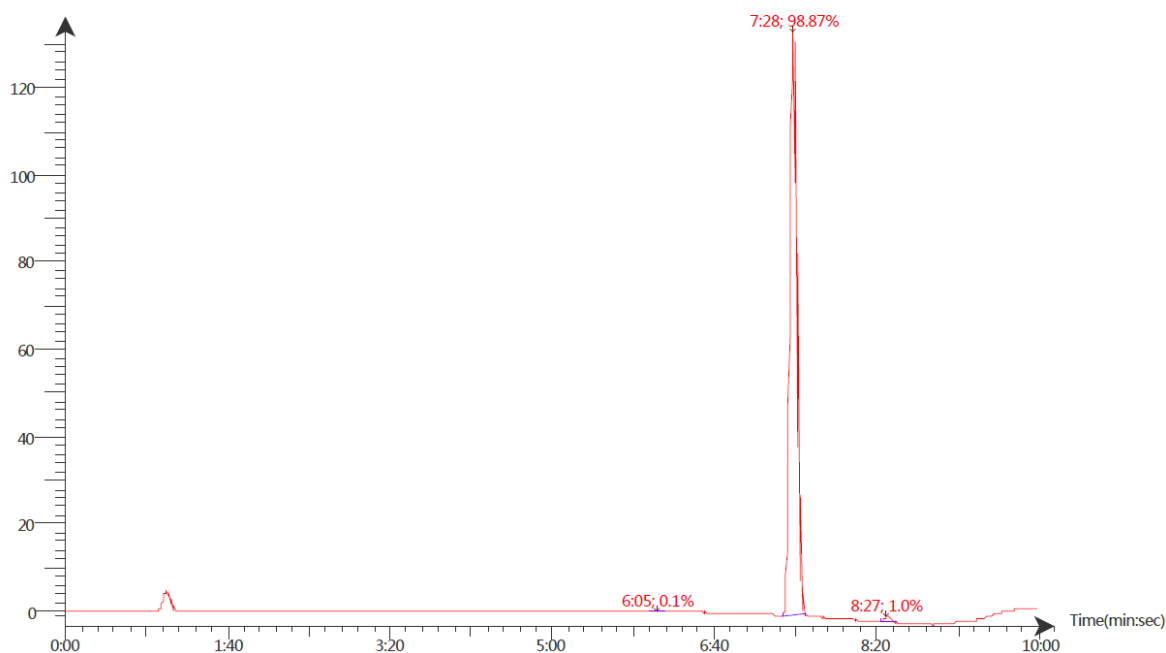**Compound 48:**

Intensity WWD: Signal A, 254 nm  
AEC239-pure\_UV.datx 2019.08.02 12:29:43 ;

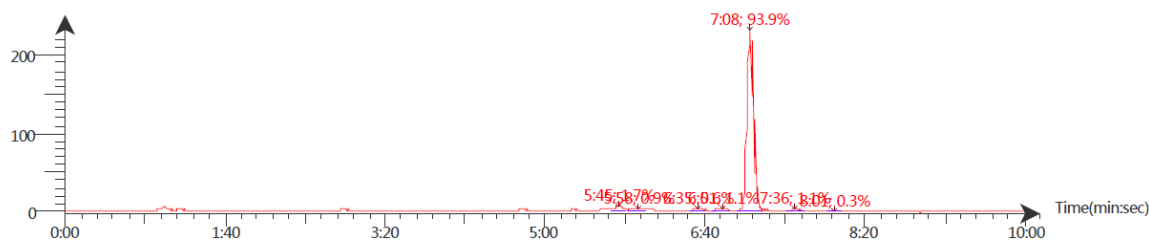

| Time (Peak Maximum M:S/Minutes) | Maximum Intensity (c/s) | Time (Peak Centroid M:S/Minutes) | Peak Area | % Peak Area | Peak Resolution | Label |
|---------------------------------|-------------------------|----------------------------------|-----------|-------------|-----------------|-------|
| 2:53.87                         | 4.7E-1                  | 2:53.93                          | 3E0       | 0.2         | 6.2             |       |
| 4:45.47                         | 2.6E-1                  | 4:46.38                          | 1.7E0     | 0.1         | 7.1             |       |
| 5:45.47                         | 4.5E0                   | 5:45.57                          | 2.1E1     | 1.7         | 4.5             |       |
| 5:58.27                         | 2E0                     | 5:58.45                          | 1.1E1     | 0.9         | 5.2             |       |
| 6:35.47                         | 1.6E0                   | 6:35.48                          | 7.3E0     | 0.6         | 4.3             |       |
| 6:50.67                         | 2.7E0                   | 6:50.45                          | 1.3E1     | 1.1         | 4.9             |       |
| 7:07.87                         | 2.3E2                   | 7:07.99                          | 1.2E3     | 93.9        | 4.7             |       |
| 7:36.27                         | 2.8E0                   | 7:36.34                          | 1.3E1     | 1.1         | 4.6             |       |
| 8:01.07                         | 7.4E-1                  | 8:00.28                          | 4E0       | 0.3         | 5.5             |       |

## Compound 49:

Intensity VWD: Signal A, 254 nm  
EMS-28\_UV.dabx 2019.07.25 14:47:55 ;

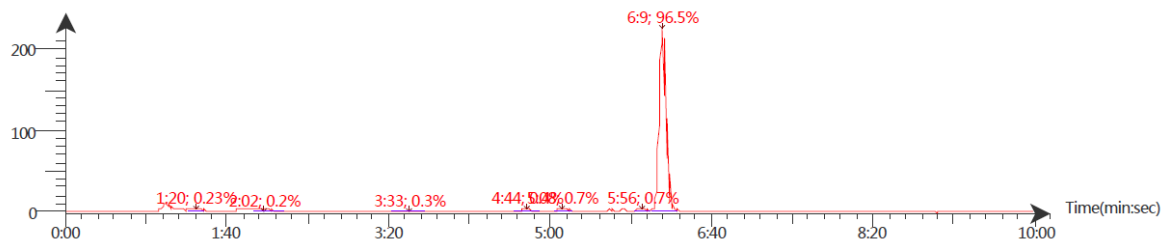

## Compound 50:

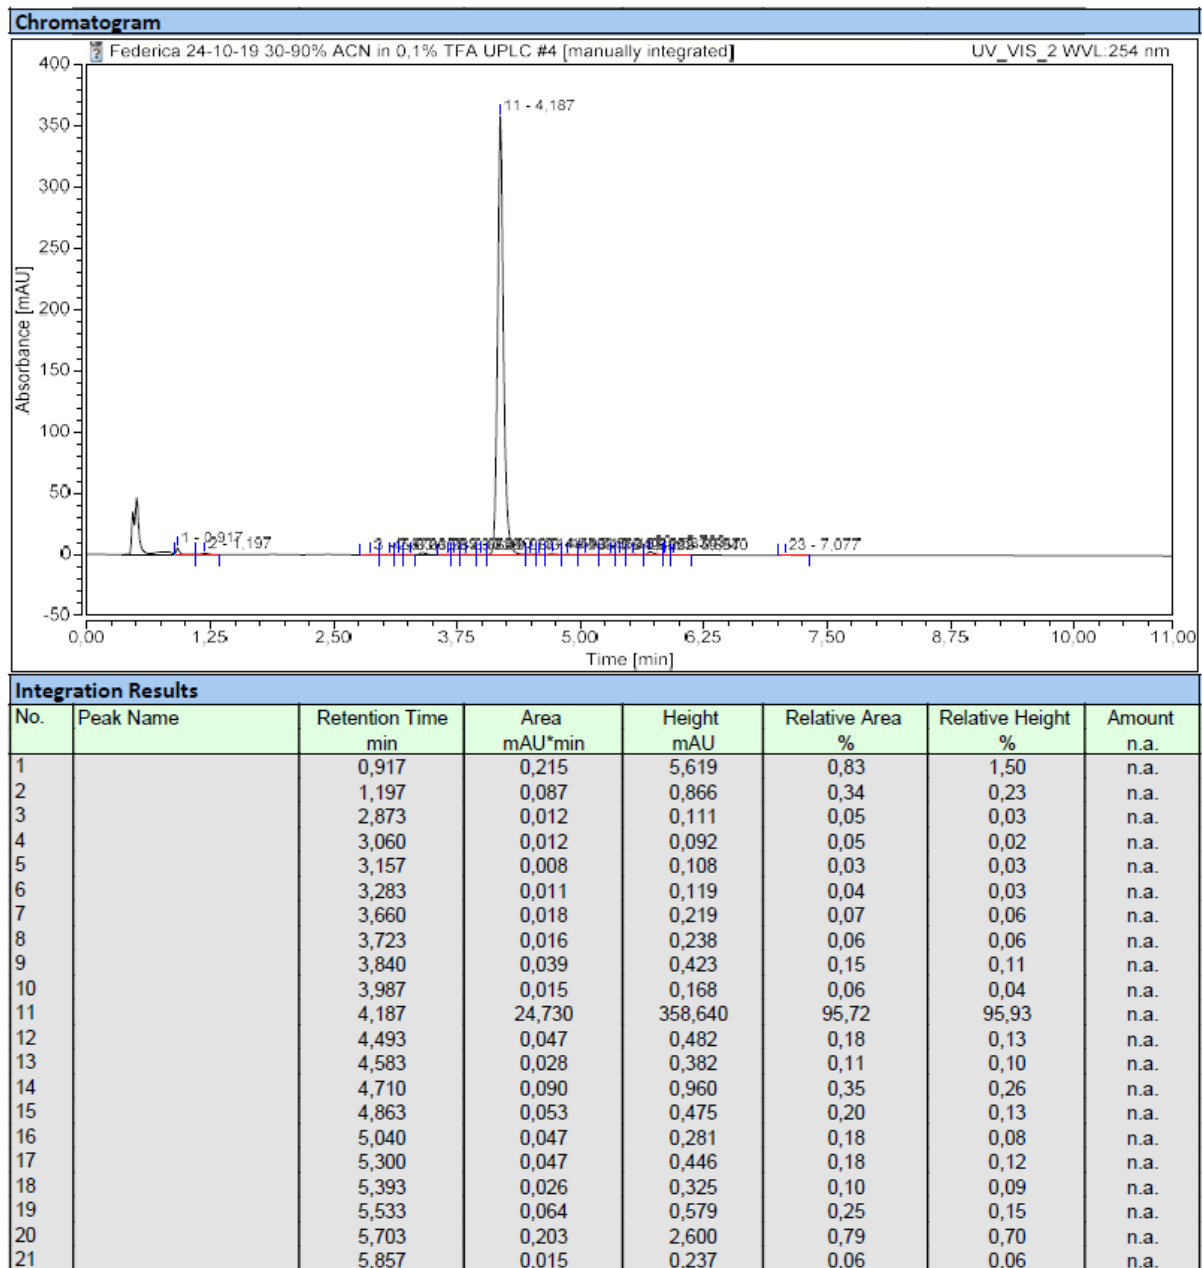

**Compound 51:**

Intensity VWD: Signal A, 254 nm  
AEC240\_UV.datx 2019.08.07 12:03:33 ;

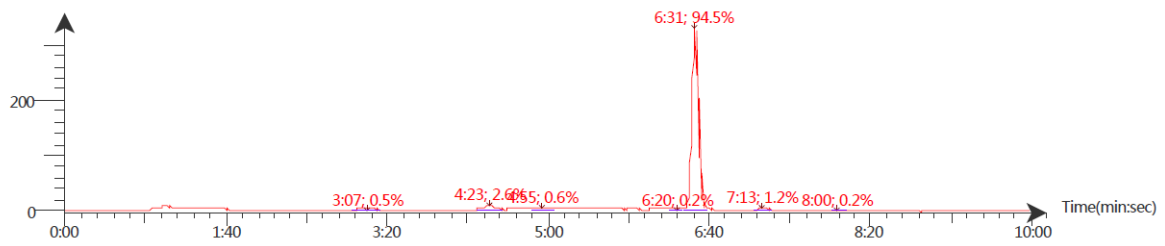

| Time (Peak Maximum M:S/Minutes) | Maximum Intensity (c/s) | Time (Peak Centroid M:S/Minutes) | Peak Area | % Peak Area | Peak Resolution | Label |
|---------------------------------|-------------------------|----------------------------------|-----------|-------------|-----------------|-------|
| 3:07.24                         | 1.1E0                   | 3:06.71                          | 9.4E0     | 0.5         | 8.9             |       |
| 4:23.24                         | 7E0                     | 4:22.99                          | 4.5E1     | 2.6         | 6.2             |       |
| 4:54.84                         | 1.7E0                   | 4:55.54                          | 1E1       | 0.6         | 5.4             |       |
| 6:06.44                         | 5.1E-1                  | 6:06.37                          | 2.3E0     | 0.1         | 4.5             |       |
| 6:19.64                         | 9.5E-1                  | 6:19.28                          | 4.1E0     | 0.2         | 4.2             |       |
| 6:30.84                         | 3.3E2                   | 6:30.92                          | 1.6E3     | 94.5        | 4.7             |       |
| 7:13.24                         | 4.5E0                   | 7:13.04                          | 2.1E1     | 1.2         | 4.5             |       |
| 8:00.04                         | 5.9E-1                  | 7:59.80                          | 3.1E0     | 0.2         | 5.3             |       |

**Compound 52:**

Intensity VWD: Signal A, 254 nm  
END 65 MeOH\_UV.datx 2019.10.11 11:57:37 ;

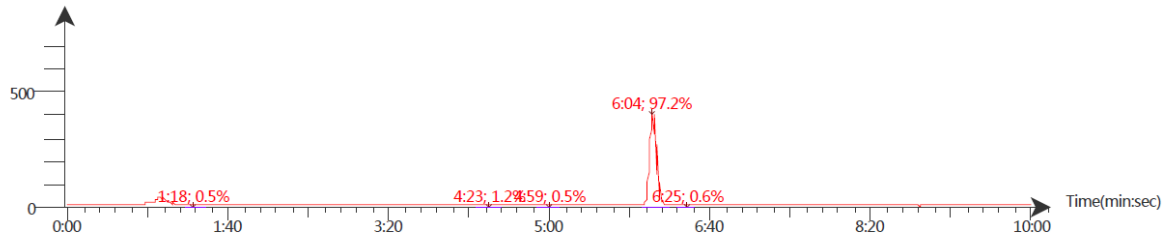

| Time (Peak Maximum M:S/Minutes) | Maximum Intensity (c/s) | Time (Peak Centroid M:S/Minutes) | Peak Area | % Peak Area | Peak Resolution | Label |
|---------------------------------|-------------------------|----------------------------------|-----------|-------------|-----------------|-------|
| 1:18.03                         | 1.5E0                   | 1:17.85                          | 9.9E0     | 0.5         | 6.1             |       |
| 4:22.83                         | 3.1E0                   | 4:22.63                          | 2.5E1     | 1.2         | 7.6             |       |
| 4:58.83                         | 1.8E0                   | 4:59.08                          | 1.1E1     | 0.5         | 5.6             |       |
| 6:04.03                         | 4E2                     | 6:04.22                          | 2E3       | 97.2        | 4.8             |       |
| 6:24.83                         | 2.3E0                   | 6:25.46                          | 1.3E1     | 0.6         | 5.2             |       |

**Compound 53:**

Intensity VWD: Signal A, 254 nm  
AEC255\_UV.datx 2019.08.29 09:38:33 ;

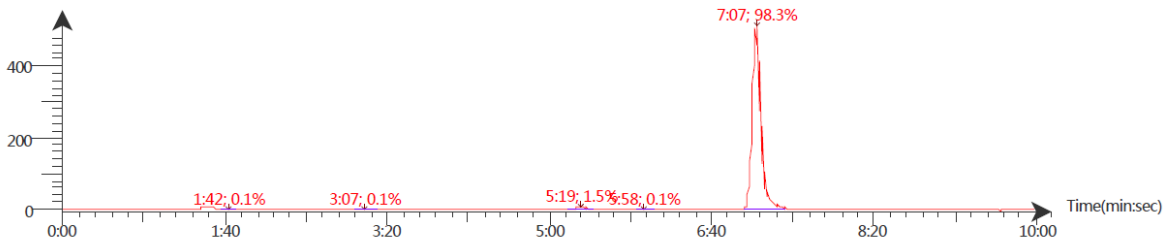

| Time (Peak Maximum M:S/Minutes) | Maximum Intensity (c/s) | Time (Peak Centroid M:S/Minutes) | Peak Area | % Peak Area | Peak Resolution | Label |
|---------------------------------|-------------------------|----------------------------------|-----------|-------------|-----------------|-------|
| 1:42.07                         | 3.4E-1                  | 1:42.77                          | 1.8E0     | 0.1         | 5.7             |       |
| 3:07.27                         | 2.9E-1                  | 3:06.33                          | 2.2E0     | 0.1         | 8.1             |       |
| 5:18.87                         | 8.3E0                   | 5:18.87                          | 4.9E1     | 1.5         | 5.7             |       |
| 5:57.67                         | 2.7E-1                  | 5:58.82                          | 1.9E0     | 0.1         | 7.7             |       |
| 7:06.87                         | 5.2E2                   | 7:07.70                          | 3.2E3     | 98.3        | 5.6             |       |

**Compound 54:**

VWD: Signal A, 254 nm  
AEC307\_UV.datx 2019.11.29 14:05:35;  
Max: 3.6E2

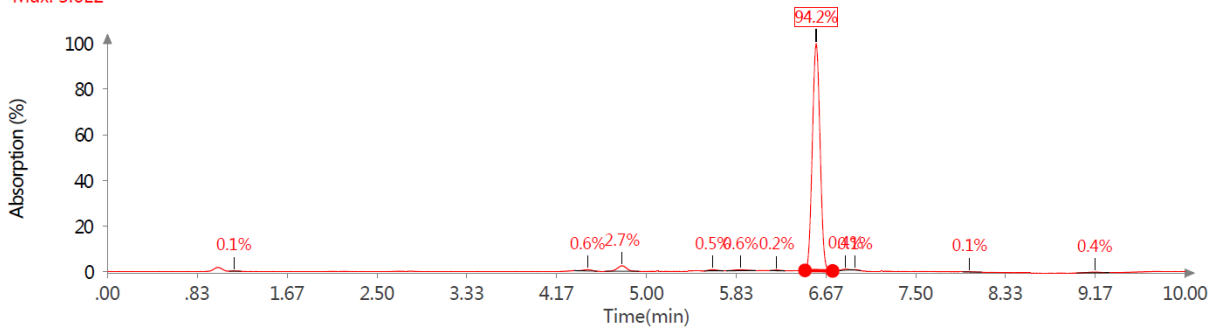

| Time (Peak Maximum M:S/Minutes) | Maximum Absorption (mAU) | Time (Peak Centroid M:S/Minutes) | Peak Area | % Peak Area | Peak Resolution | Label |
|---------------------------------|--------------------------|----------------------------------|-----------|-------------|-----------------|-------|
| 4.46                            | 2E0                      | 4.45                             | 1.1E1     | 0.6         | 5.3             |       |
| 4.78                            | 8.6E0                    | 4.77                             | 5.2E1     | 2.7         | 5.6             |       |
| 5.62                            | 1.9E0                    | 5.62                             | 9.6E0     | 0.5         | 5.1             |       |
| 5.87                            | 1.4E0                    | 5.87                             | 1.2E1     | 0.6         | 8.0             |       |
| 6.21                            | 9.1E-1                   | 6.21                             | 3.9E0     | 0.2         | 4.2             |       |
| 6.58                            | 3.6E2                    | 6.58                             | 1.8E3     | 94.2        | 4.7             |       |
| 6.85                            | 1.8E0                    | 6.85                             | 6.7E0     | 0.4         | 3.8             |       |
| 6.94                            | 7.1E-1                   | 6.94                             | 2.3E0     | 0.1         | 4.8             |       |
| 8.00                            | 3.3E-1                   | 8.00                             | 1.8E0     | 0.1         | 10.0            |       |
| 9.16                            | 1E0                      | 9.16                             | 8.2E0     | 0.4         | 7.2             |       |



**Compound 55:**

Intensity VWD: Signal A, 254 nm  
AEC222\_UV.datx 2019.07.16 15:11:28;

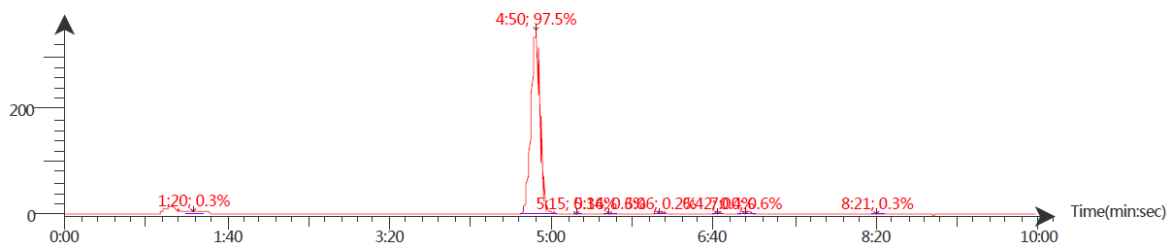**Compound 57:**

VWD: Signal A, 254 nm  
AEC335-triturMeOH\_UV.datx 2020.02.14 11:54:58;  
Max: 3.6E2

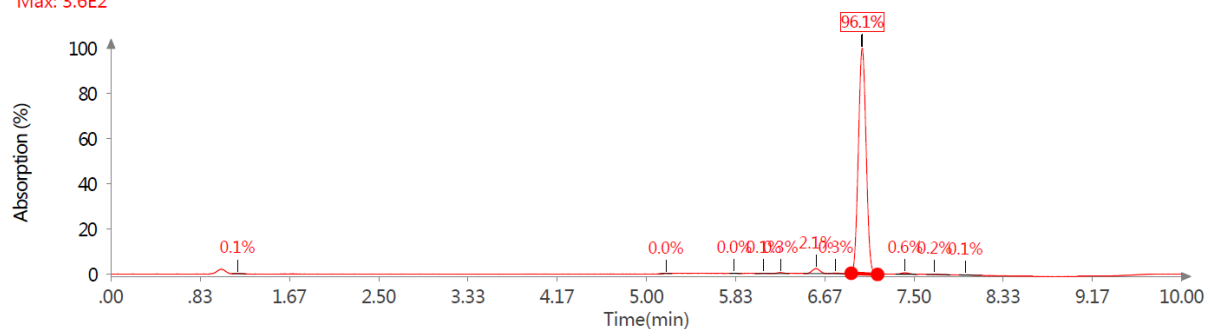

| Time (Peak Maximum M:S/Minutes) | Maximum Absorption (mAU) | Time (Peak Centroid M:S/Minutes) | Peak Area | % Peak Area | Peak Resolution | Label |
|---------------------------------|--------------------------|----------------------------------|-----------|-------------|-----------------|-------|
| 1.18                            | 4.3E-1                   | 1.18                             | 1.6E0     | 0.1         | 3.7             |       |
| 5.82                            | 1.8E-1                   | 5.82                             | 7.1E-1    | 0.0         | 3.9             |       |
| 6.10                            | 3.4E-1                   | 6.10                             | 1.7E0     | 0.1         | 5.1             |       |
| 6.25                            | 1.2E0                    | 6.25                             | 5.3E0     | 0.3         | 4.4             |       |
| 6.59                            | 7.8E0                    | 6.58                             | 3.9E1     | 2.1         | 4.8             |       |
| 6.77                            | 9.8E-1                   | 6.77                             | 5E0       | 0.3         | 5.0             |       |
| 7.02                            | 3.5E2                    | 7.02                             | 1.8E3     | 96.1        | 4.8             |       |
| 7.42                            | 2.2E0                    | 7.42                             | 1.1E1     | 0.6         | 4.7             |       |
| 7.69                            | 7.6E-1                   | 7.69                             | 4.6E0     | 0.2         | 5.5             |       |
| 7.98                            | 3.2E-1                   | 7.98                             | 1.9E0     | 0.1         | 12.8            |       |

## Compound 58:

Intensity WWD: Signal A, 254 nm  
AEC271-triturtMeOH\_UV.datx 2019.10.07 12:24:29;

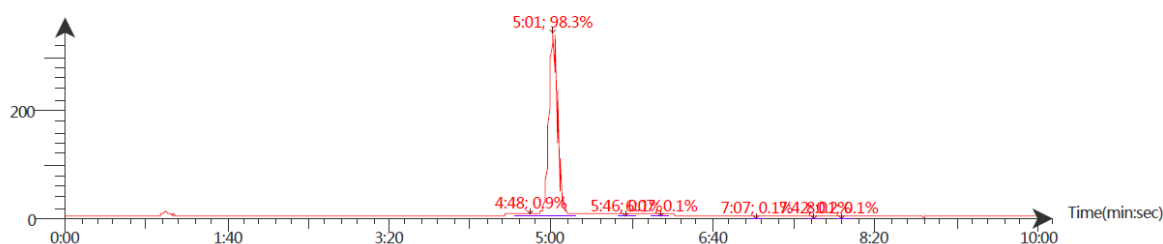

| Time (Peak Maximum M:S/Minutes) | Maximum Intensity (c/s) | Time (Peak Centroid M:S/Minutes) | Peak Area | % Peak Area | Peak Resolution | Label |
|---------------------------------|-------------------------|----------------------------------|-----------|-------------|-----------------|-------|
| 4:37.14                         | 2.4E-2                  | 4:34.04                          | 9.9E-1    | 0.0         | 9.6             |       |
| 4:37.14                         | 1.7E-1                  | 4:34.85                          | 1.2E0     | 0.1         | 6.4             |       |
| 4:48.34                         | 2.2E0                   | 4:46.24                          | 1.8E1     | 0.9         | 5.6             |       |
| 5:01.14                         | 3.4E2                   | 5:00.97                          | 2.1E3     | 98.3        | 5.9             |       |
| 5:45.94                         | 5.8E-1                  | 5:46.14                          | 2.8E0     | 0.1         | 4.8             |       |
| 6:07.14                         | 4.8E-1                  | 6:07.03                          | 3E0       | 0.1         | 6.4             |       |
| 7:06.74                         | 3.5E-1                  | 7:06.37                          | 1.9E0     | 0.1         | 5.5             |       |
| 7:06.74                         | 3.7E-1                  | 7:06.51                          | 2.1E0     | 0.1         | 6.0             |       |
| 7:41.94                         | 9.3E-1                  | 7:42.05                          | 4.2E0     | 0.2         | 4.6             |       |
| 8:00.74                         | 4.6E-1                  | 8:00.12                          | 2.7E0     | 0.1         | 6.4             |       |

## Compound 59:

Intensity WWD: Signal A, 254 nm  
ENF 87\_UV.datx 2019.10.21 14:06:10;

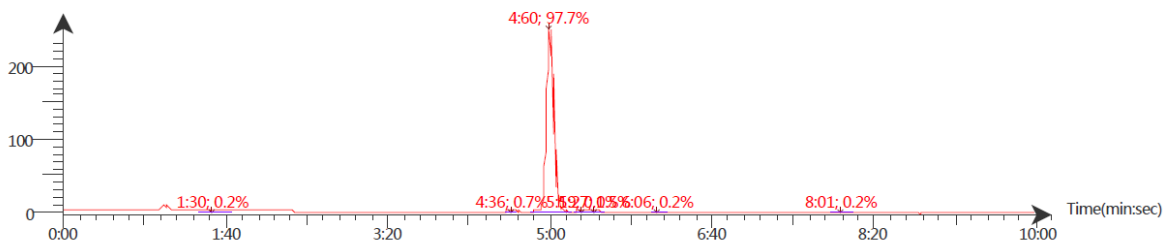

| Time (Peak Maximum M:S/Minutes) | Maximum Intensity (c/s) | Time (Peak Centroid M:S/Minutes) | Peak Area | % Peak Area | Peak Resolution | Label |
|---------------------------------|-------------------------|----------------------------------|-----------|-------------|-----------------|-------|
| 1:29.66                         | 1.8E-1                  | 1:31.71                          | 2.3E0     | 0.2         | 13.6            |       |
| 2:41.26                         | 1E-1                    | 2:39.41                          | 1.1E0     | 0.1         | 19.6            |       |
| 4:16.46                         | 2.1E-1                  | 4:16.97                          | 1.2E0     | 0.1         | 5.4             |       |
| 4:35.66                         | 2E0                     | 4:35.87                          | 9.9E0     | 0.7         | 5.2             |       |
| 4:59.66                         | 2.5E2                   | 4:59.69                          | 1.4E3     | 97.7        | 5.1             |       |
| 5:19.26                         | 4.1E-1                  | 5:18.88                          | 2.1E0     | 0.1         | 4.7             |       |
| 5:26.86                         | 1.5E0                   | 5:26.86                          | 7.5E0     | 0.5         | 4.6             |       |
| 6:06.06                         | 5.4E-1                  | 6:06.12                          | 3.1E0     | 0.2         | 5.5             |       |
| 6:52.86                         | 2.6E-1                  | 6:51.58                          | 1.3E0     | 0.1         | 4.9             |       |
| 8:01.26                         | 4.8E-1                  | 7:59.66                          | 2.9E0     | 0.2         | 5.5             |       |

**Compound 60:**

VWD: Signal A, 254 nm  
 AEC291-3\_UV.datx 2019.11.12 08:29:24;  
 Max: 7.1E1

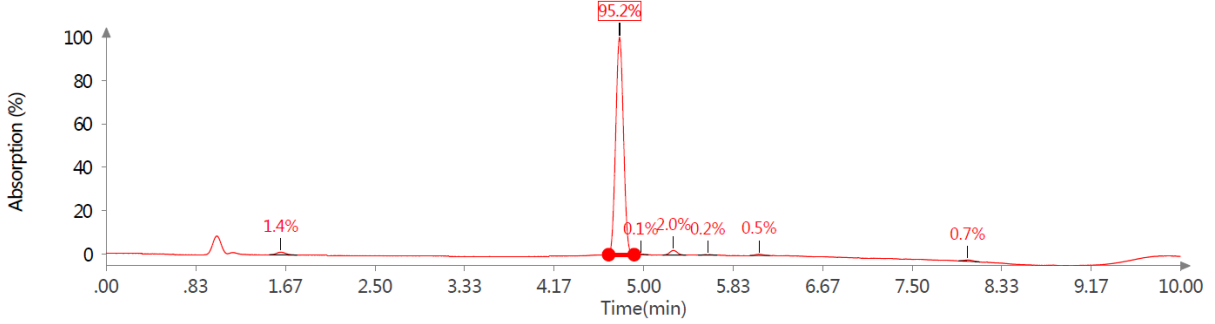

| Time (Peak Maximum M:S/Minutes) | Maximum Absorption (mAU) | Time (Peak Centroid M:S/Minutes) | Peak Area | % Peak Area | Peak Resolution | Label |
|---------------------------------|--------------------------|----------------------------------|-----------|-------------|-----------------|-------|
| 1.62                            | 8.8E-1                   | 1.62                             | 5.1E0     | 1.4         | 5.4             |       |
| 4.78                            | 7.1E1                    | 4.78                             | 3.5E2     | 95.2        | 4.8             |       |
| 4.98                            | 5.8E-2                   | 4.97                             | 2.5E-1    | 0.1         | 6.4             |       |
| 5.28                            | 1.5E0                    | 5.28                             | 7.3E0     | 2.0         | 4.6             |       |
| 5.60                            | 1.7E-1                   | 5.60                             | 8.4E-1    | 0.2         | 4.8             |       |
| 6.08                            | 3.9E-1                   | 6.07                             | 1.9E0     | 0.5         | 4.8             |       |
| 8.02                            | 4.2E-1                   | 8.02                             | 2.5E0     | 0.7         | 6.1             |       |

**Compound 61:**

VWD: Signal A, 254 nm  
 ENF 106 MeOH B\_UV.datx 2019.11.28 14:03:24;  
 Max: 2.6E2

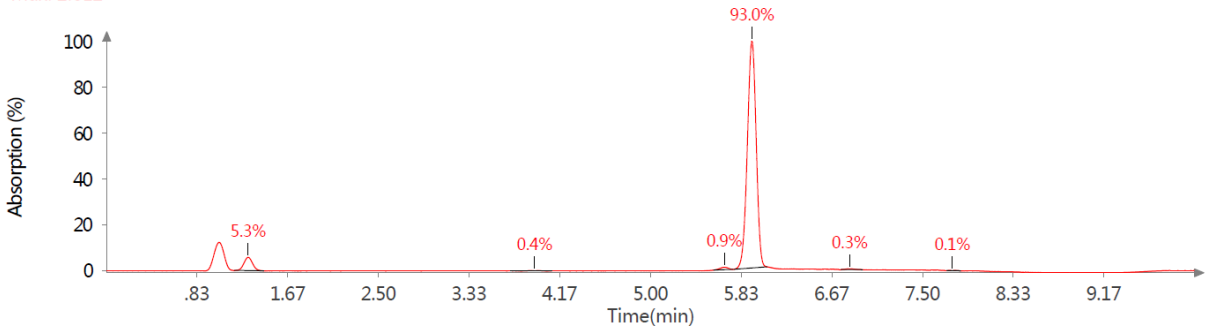

| Time (Peak Maximum M:S/Minutes) | Maximum Absorption (mAU) | Time (Peak Centroid M:S/Minutes) | Peak Area | % Peak Area | Peak Resolution | Label |
|---------------------------------|--------------------------|----------------------------------|-----------|-------------|-----------------|-------|
| 1.30                            | 1.5E1                    | 1.30                             | 8.3E1     | 5.3         | 5.1             |       |
| 3.94                            | 7.1E-1                   | 3.93                             | 6.8E0     | 0.4         | 9.2             |       |
| 5.68                            | 2.7E0                    | 5.68                             | 1.4E1     | 0.9         | 5.0             |       |
| 5.93                            | 2.6E2                    | 5.93                             | 1.5E3     | 93.0        | 5.3             |       |
| 6.83                            | 8.4E-1                   | 6.83                             | 4.6E0     | 0.3         | 5.2             |       |
| 7.78                            | 2.9E-1                   | 7.77                             | 1.2E0     | 0.1         | 4.4             |       |

## Compound 62:

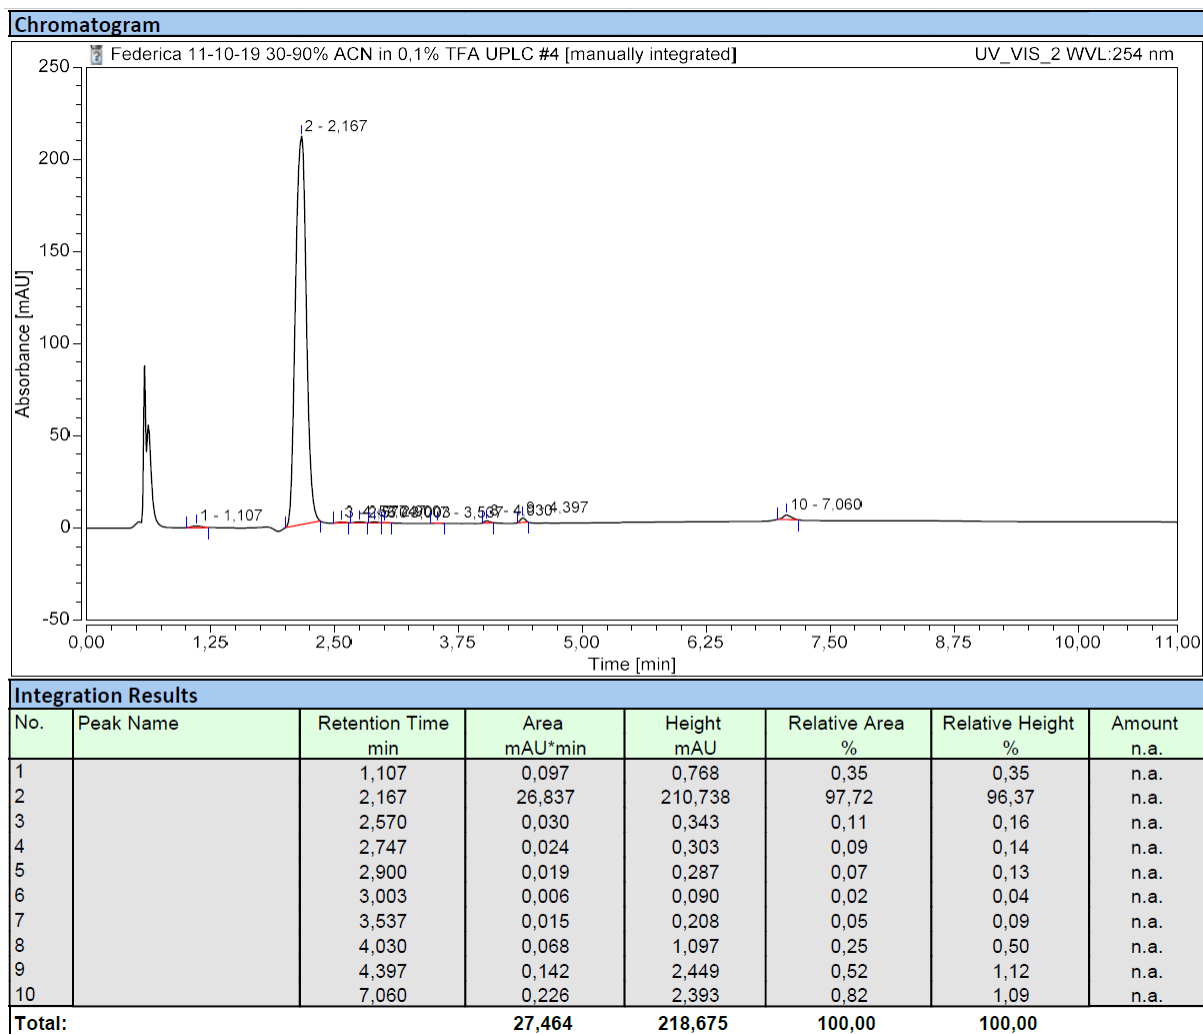

## Compound 63:

Intensity VWD: Signal A, 254 nm  
AEC268-triturWater\_UV.datx 2019.10.01 13:01:05 ;

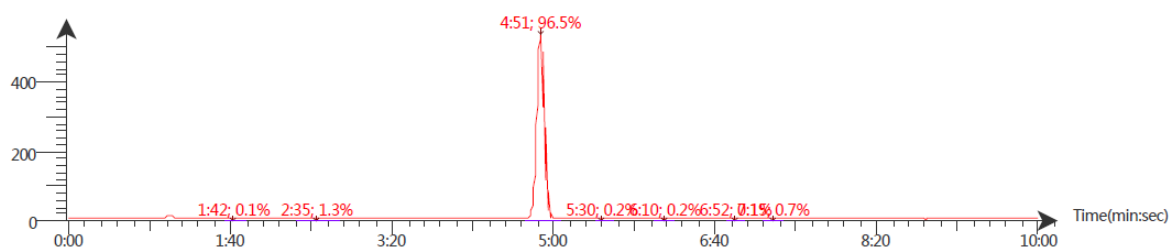

| Time (Peak Maximum M:S/Minutes) | Maximum Intensity (c/s) | Time (Peak Centroid M:S/Minutes) | Peak Area | % Peak Area | Peak Resolution | Label |
|---------------------------------|-------------------------|----------------------------------|-----------|-------------|-----------------|-------|
| 1:10.46                         | 3.8E-1                  | 1:10.80                          | 1.4E0     | 0.0         | 3.7             |       |
| 1:10.46                         | 3.8E-1                  | 1:10.80                          | 1.4E0     | 0.0         | 3.7             |       |
| 1:42.46                         | 5.2E-1                  | 1:41.96                          | 3.6E0     | 0.1         | 7.0             |       |
| 1:42.46                         | 4.8E-1                  | 1:41.98                          | 3.1E0     | 0.1         | 6.6             |       |
| 1:42.46                         | 4.4E-1                  | 1:42.09                          | 2.7E0     | 0.1         | 6.2             |       |
| 2:34.86                         | 3.4E0                   | 2:33.11                          | 3.9E1     | 1.3         | 10.9            |       |
| 4:27.66                         | 4.9E-1                  | 4:27.48                          | 3.2E0     | 0.1         | 6.2             |       |
| 4:27.66                         | 5E-1                    | 4:27.55                          | 3.2E0     | 0.1         | 6.1             |       |
| 4:27.66                         | 4.6E-1                  | 4:27.56                          | 2.7E0     | 0.1         | 5.8             |       |
| 4:27.66                         | 4.8E-1                  | 4:27.56                          | 2.9E0     | 0.1         | 5.9             |       |
| 4:27.66                         | 5.1E-1                  | 4:27.56                          | 3.3E0     | 0.1         | 6.3             |       |
| 4:51.26                         | 5.4E2                   | 4:51.42                          | 2.9E3     | 96.5        | 5.2             |       |
| 5:29.66                         | 1.1E0                   | 5:29.99                          | 5.9E0     | 0.2         | 5.4             |       |
| 6:10.06                         | 9.8E-1                  | 6:08.85                          | 6.4E0     | 0.2         | 6.2             |       |
| 6:52.46                         | 7E-1                    | 6:52.46                          | 3.3E0     | 0.1         | 4.6             |       |
| 7:14.86                         | 4.4E0                   | 7:14.82                          | 2.2E1     | 0.7         | 4.7             |       |
| 8:00.46                         | 3.7E-1                  | 7:59.81                          | 2.1E0     | 0.1         | 6.1             |       |
| 8:00.46                         | 3.2E-1                  | 8:00.12                          | 1.6E0     | 0.1         | 5.4             |       |

## Compound 64:

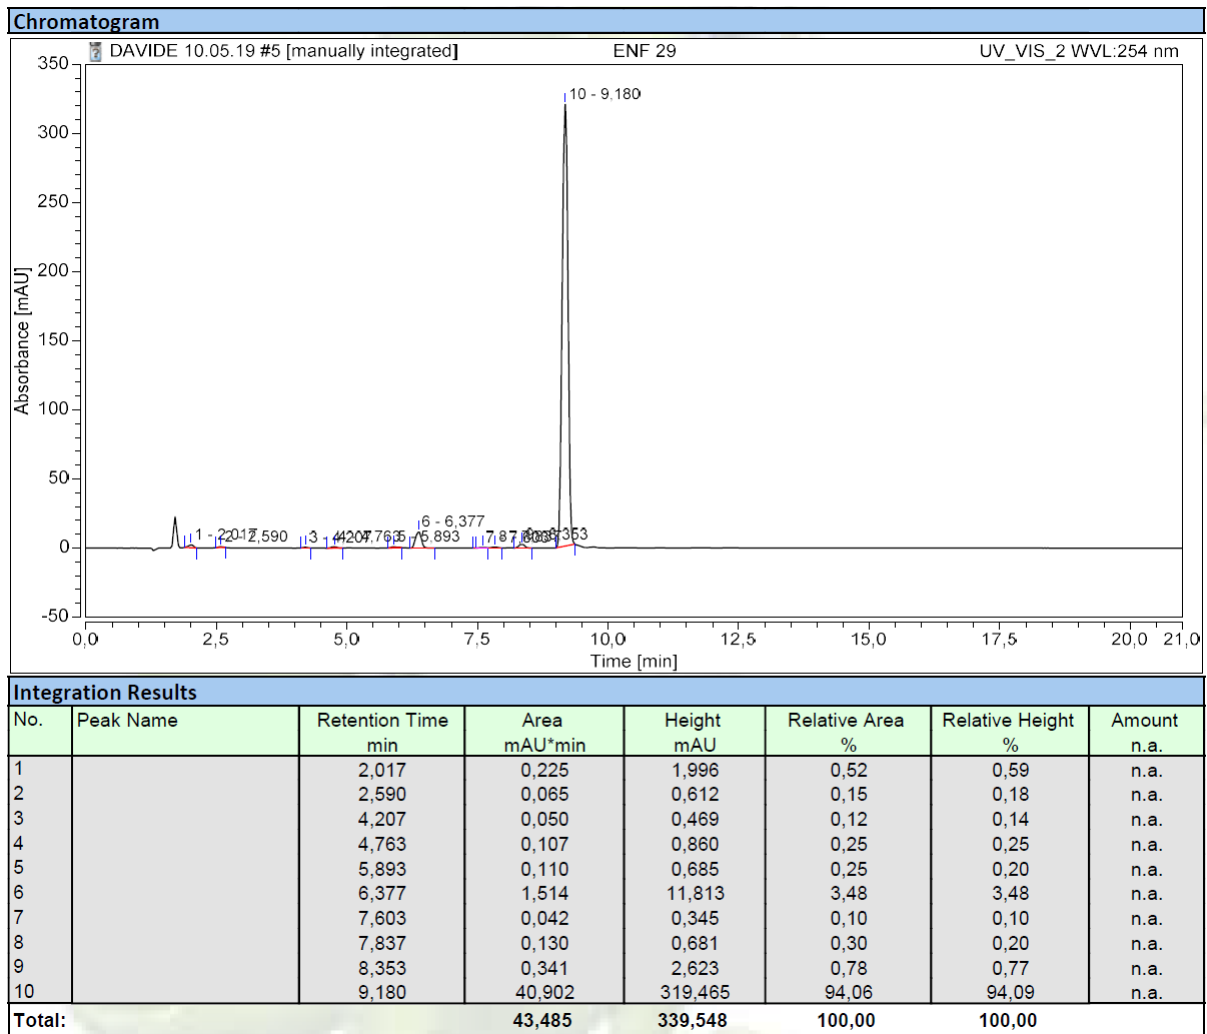

## Compound 65:

VWD: Signal A, 254 nm  
IJF\_3-END-73\_UV.datx 2021.06.18 17:17:27;

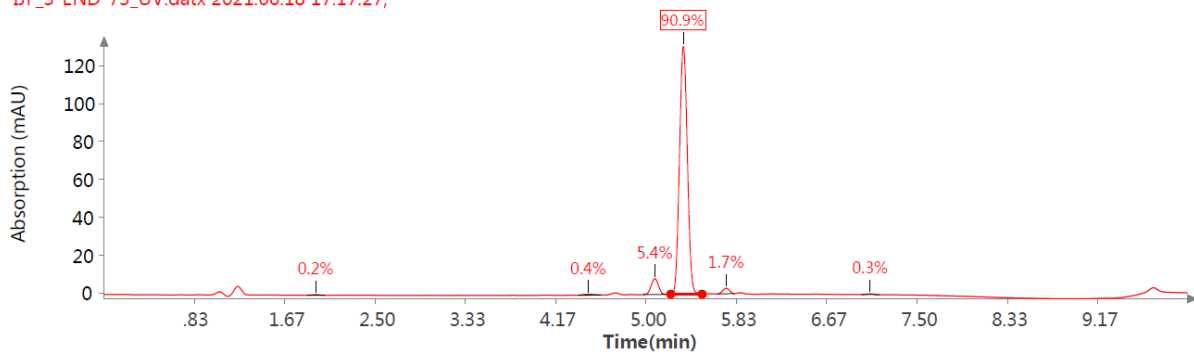

| Time (Peak Maximum M:S/Minutes) | Maximum Absorption (mAU) | Time (Peak Centroid M:S/Minutes) | Peak Area | % Peak Area | Peak Resolution | Label |
|---------------------------------|--------------------------|----------------------------------|-----------|-------------|-----------------|-------|
| 1.96                            | 2.9E-1                   | 1.95                             | 1.3E0     | 0.2         | 4.5             |       |
| 4.46                            | 4.6E-1                   | 4.47                             | 2.8E0     | 0.4         | 6.3             |       |
| 5.08                            | 8.4E0                    | 5.08                             | 3.9E1     | 5.4         | 4.5             |       |
| 5.34                            | 1.3E2                    | 5.35                             | 6.6E2     | 90.9        | 4.8             |       |
| 5.74                            | 2.9E0                    | 5.74                             | 1.3E1     | 1.7         | 4.2             |       |
| 7.07                            | 4.4E-1                   | 7.07                             | 2E0       | 0.3         | 4.4             |       |

**Compound 66:**

VWD: Signal A, 254 nm  
 END 85\_UV.datx 2019.12.02 14:51:39;  
 Max: 5.7E2

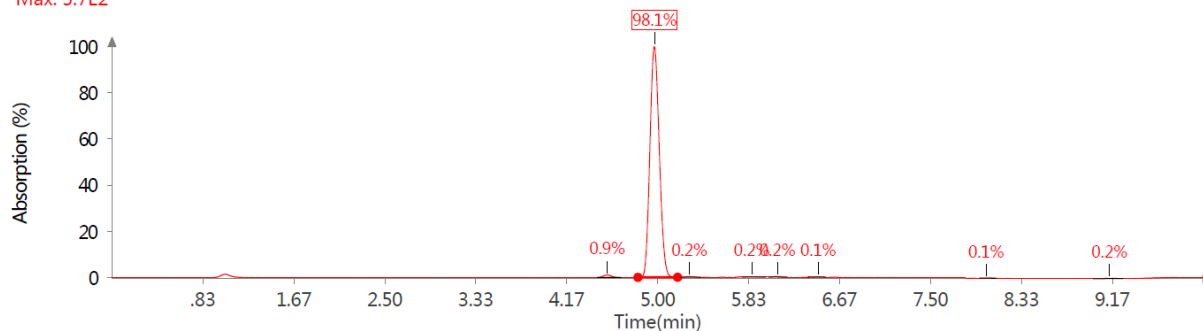

| Time (Peak Maximum M:S/Minutes) | Maximum Absorption (mAU) | Time (Peak Centroid M:S/Minutes) | Peak Area | % Peak Area | Peak Resolution | Label |
|---------------------------------|--------------------------|----------------------------------|-----------|-------------|-----------------|-------|
| 4.53                            | 6E0                      | 4.54                             | 3E1       | 0.9         | 4.7             |       |
| 4.97                            | 5.7E2                    | 4.97                             | 3.4E3     | 98.1        | 5.6             |       |
| 5.29                            | 1.7E0                    | 5.29                             | 7.9E0     | 0.2         | 4.6             |       |
| 5.86                            | 8.1E-1                   | 5.86                             | 5.2E0     | 0.2         | 6.1             |       |
| 6.09                            | 1.6E0                    | 6.10                             | 7.6E0     | 0.2         | 4.6             |       |
| 6.47                            | 1.1E0                    | 6.47                             | 5.1E0     | 0.1         | 4.3             |       |
| 8.01                            | 3.6E-1                   | 8.01                             | 1.8E0     | 0.1         | 9.2             |       |
| 9.14                            | 8.9E-1                   | 9.14                             | 6.9E0     | 0.2         | 7.5             |       |

**Compound 67:**

VWD: Signal A, 254 nm  
 ESM53\_MEOH\_oborina4\_UV.datx 2019.12.10 11:23:29;  
 Max: 7.2E1

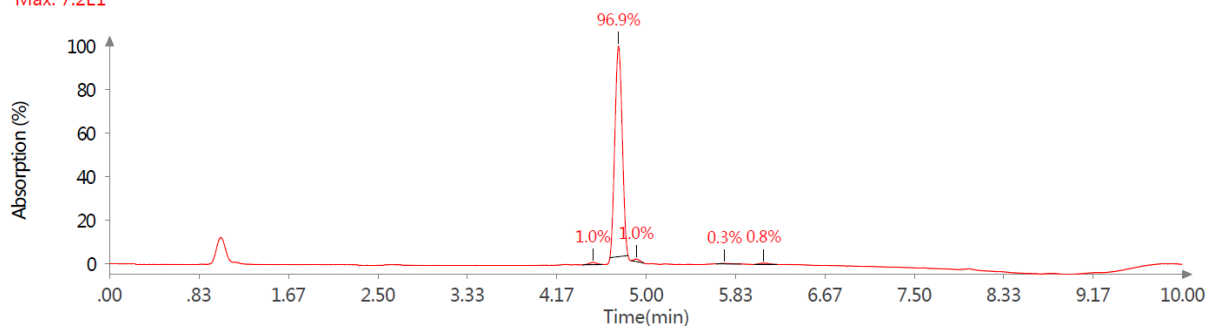

| Time (Peak Maximum M:S/Minutes) | Maximum Absorption (mAU) | Time (Peak Centroid M:S/Minutes) | Peak Area | % Peak Area | Peak Resolution | Label |
|---------------------------------|--------------------------|----------------------------------|-----------|-------------|-----------------|-------|
| 4.50                            | 7.2E-1                   | 4.50                             | 3.5E0     | 1.0         | 4.7             |       |
| 4.74                            | 7E1                      | 4.74                             | 3.3E2     | 96.9        | 4.6             |       |
| 4.91                            | 8.5E-1                   | 4.91                             | 3.3E0     | 1.0         | 3.9             |       |
| 5.73                            | 1.7E-1                   | 5.73                             | 1.1E0     | 0.3         | 6.1             |       |
| 6.10                            | 4.8E-1                   | 6.10                             | 2.8E0     | 0.8         | 5.5             |       |

**Compound 68:**

VWD: Signal A, 254 nm  
 END 75\_UV.datx 2019.11.08 09:56:40;  
 Max: 2.1E2

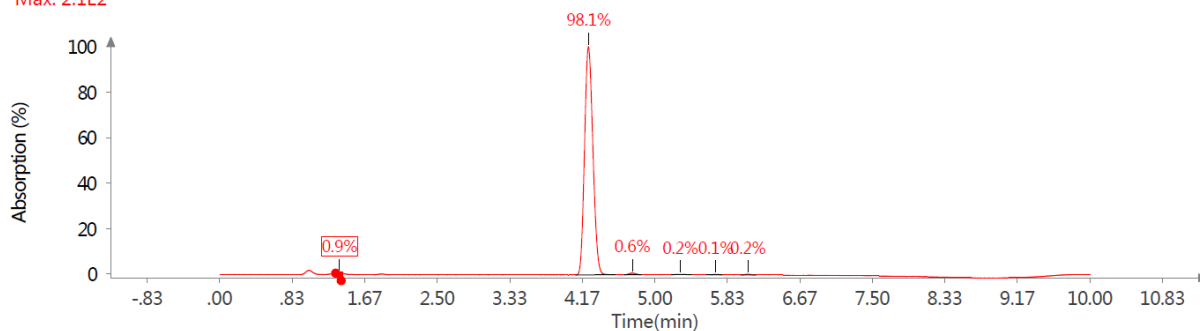

| Time (Peak Maximum M:S/Minutes) | Maximum Absorption (mAU) | Time (Peak Centroid M:S/Minutes) | Peak Area | % Peak Area | Peak Resolution | Label |
|---------------------------------|--------------------------|----------------------------------|-----------|-------------|-----------------|-------|
| 1.38                            | 4.8E0                    | 1.38                             | 1.3E1     | 0.9         | 3.6             |       |
| 4.24                            | 2.1E2                    | 4.24                             | 1.4E3     | 98.1        | 6.3             |       |
| 4.74                            | 1.5E0                    | 4.74                             | 7.9E0     | 0.6         | 5.2             |       |
| 5.29                            | 3.3E-1                   | 5.29                             | 2.4E0     | 0.2         | 7.2             |       |
| 5.70                            | 2.8E-1                   | 5.70                             | 1.2E0     | 0.1         | 4.3             |       |
| 6.07                            | 5.5E-1                   | 6.07                             | 2.7E0     | 0.2         | 4.7             |       |

**Compound 69:**

VWD: Signal A, 254 nm  
 END 99\_UV.datx 2020.01.27 15:44:01;  
 Max: 1.3E2

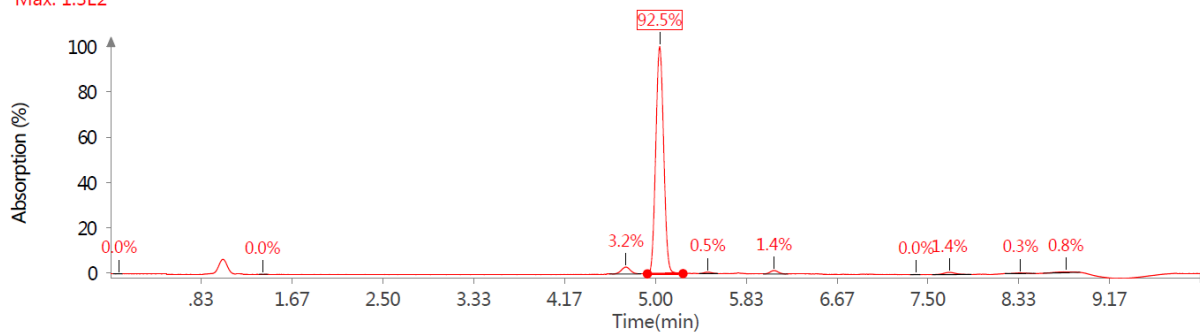

| Time (Peak Maximum M:S/Minutes) | Maximum Absorption (mAU) | Time (Peak Centroid M:S/Minutes) | Peak Area | % Peak Area | Peak Resolution | Label |
|---------------------------------|--------------------------|----------------------------------|-----------|-------------|-----------------|-------|
| 0.08                            | 1.2E-2                   | 0.08                             | 3.4E-2    | 0.0         | 2.8             |       |
| 1.40                            | 1.7E-2                   | 1.40                             | 4.7E-2    | 0.0         | 2.9             |       |
| 4.73                            | 4E0                      | 4.73                             | 2.3E1     | 3.2         | 5.3             |       |
| 5.04                            | 1.3E2                    | 5.04                             | 6.7E2     | 92.5        | 4.8             |       |
| 5.48                            | 8.1E-1                   | 5.48                             | 3.8E0     | 0.5         | 4.6             |       |
| 6.09                            | 2E0                      | 6.09                             | 1E1       | 1.4         | 4.9             |       |
| 7.39                            | 3E-2                     | 7.39                             | 9.7E-2    | 0.0         | 3.2             |       |
| 7.69                            | 1.3E0                    | 7.70                             | 9.9E0     | 1.4         | 7.0             |       |
| 8.35                            | 2.8E-1                   | 8.35                             | 2E0       | 0.3         | 6.7             |       |
| 8.75                            | 4.7E-1                   | 8.77                             | 5.5E0     | 0.8         | 13.0            |       |



**Compound 70:**

VWD: Signal A, 254 nm  
 END 98\_UV.datx 2020.01.28 16:05:28;  
 Max: 2.6E2

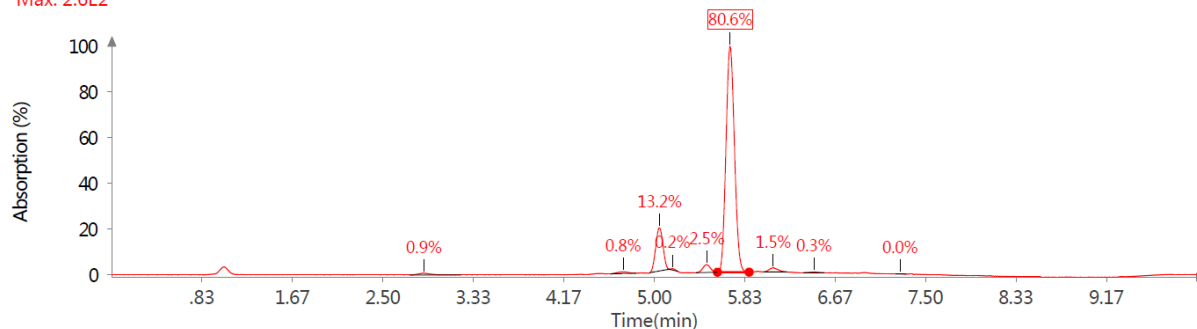

| Time (Peak Maximum M:S/Minutes) | Maximum Absorption (mAU) | Time (Peak Centroid M:S/Minutes) | Peak Area | % Peak Area | Peak Resolution | Label |
|---------------------------------|--------------------------|----------------------------------|-----------|-------------|-----------------|-------|
| 2.88                            | 1.9E0                    | 2.88                             | 1.6E1     | 0.9         | 7.3             |       |
| 4.72                            | 1.9E0                    | 4.71                             | 1.3E1     | 0.8         | 7.1             |       |
| 5.05                            | 4.9E1                    | 5.05                             | 2.3E2     | 13.2        | 4.5             |       |
| 5.17                            | 1.5E0                    | 5.17                             | 4.2E0     | 0.2         | 4.4             |       |
| 5.48                            | 8.9E0                    | 5.48                             | 4.3E1     | 2.5         | 4.7             |       |
| 5.70                            | 2.6E2                    | 5.70                             | 1.4E3     | 80.6        | 5.1             |       |
| 6.10                            | 4.5E0                    | 6.10                             | 2.6E1     | 1.5         | 5.6             |       |
| 6.47                            | 9E-1                     | 6.47                             | 4.6E0     | 0.3         | 4.9             |       |
| 7.26                            | 1.6E-1                   | 7.26                             | 5.8E-1    | 0.0         | 5.6             |       |

**Compound 71:**

VWD: Signal A, 254 nm  
 ESM69\_MeCN\_oborina2\_UV.datx 2020.02.06 11:07:01;  
 Max: 4.7E2

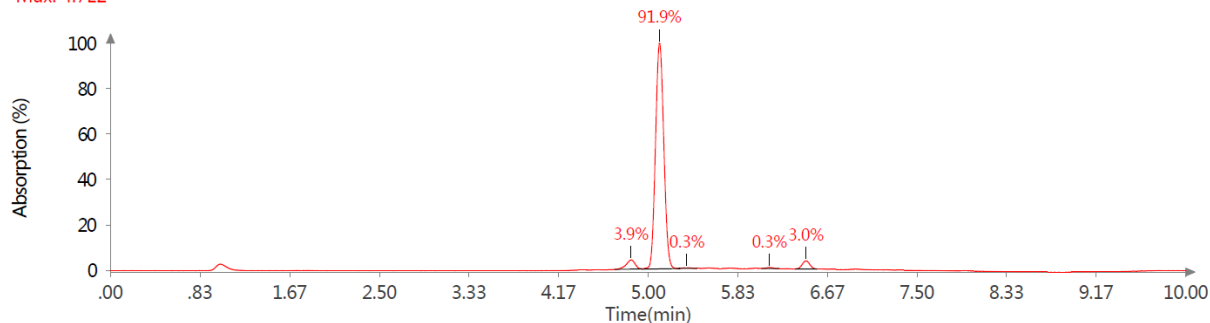

| Time (Peak Maximum M:S/Minutes) | Maximum Absorption (mAU) | Time (Peak Centroid M:S/Minutes) | Peak Area | % Peak Area | Peak Resolution | Label |
|---------------------------------|--------------------------|----------------------------------|-----------|-------------|-----------------|-------|
| 4.84                            | 1.9E1                    | 4.84                             | 1.1E2     | 3.9         | 5.2             |       |
| 5.10                            | 4.6E2                    | 5.11                             | 2.5E3     | 91.9        | 5.0             |       |
| 5.36                            | 1.2E0                    | 5.36                             | 7.2E0     | 0.3         | 6.4             |       |
| 6.13                            | 2E0                      | 6.13                             | 8.9E0     | 0.3         | 4.4             |       |
| 6.47                            | 1.7E1                    | 6.47                             | 8E1       | 3.0         | 4.7             |       |

**Compound 72:**

VWD: Signal A, 254 nm  
 END 100\_a\_UV.datx 2020.01.29 11:59:20;  
 Max: 3.5E2

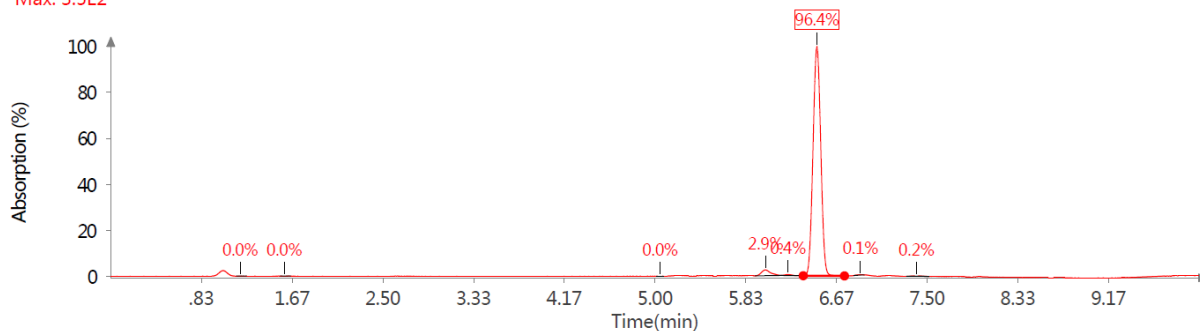

| Time (Peak Maximum M:S/Minutes) | Maximum Absorption (mAU) | Time (Peak Centroid M:S/Minutes) | Peak Area | % Peak Area | Peak Resolution | Label |
|---------------------------------|--------------------------|----------------------------------|-----------|-------------|-----------------|-------|
| 1.19                            | 6E-2                     | 1.19                             | 1.8E-1    | 0.0         | 3.0             |       |
| 1.59                            | 9.2E-2                   | 1.59                             | 3.3E-1    | 0.0         | 3.5             |       |
| 5.05                            | 3.6E-2                   | 5.05                             | 9.9E-2    | 0.0         | 2.8             |       |
| 6.01                            | 8.9E0                    | 6.01                             | 5.2E1     | 2.9         | 5.3             |       |
| 6.22                            | 1.6E0                    | 6.22                             | 6.5E0     | 0.4         | 4.0             |       |
| 6.49                            | 3.5E2                    | 6.49                             | 1.7E3     | 96.4        | 4.7             |       |
| 6.89                            | 5E-1                     | 6.89                             | 2E0       | 0.1         | 5.2             |       |
| 7.40                            | 5.9E-1                   | 7.40                             | 3.5E0     | 0.2         | 5.6             |       |

**Compound 73:**

VWD: Signal A, 254 nm  
 ESM70\_thf\_oborina3\_UV.datx 2020.02.11 10:57:12;  
 Max: 6.5E2

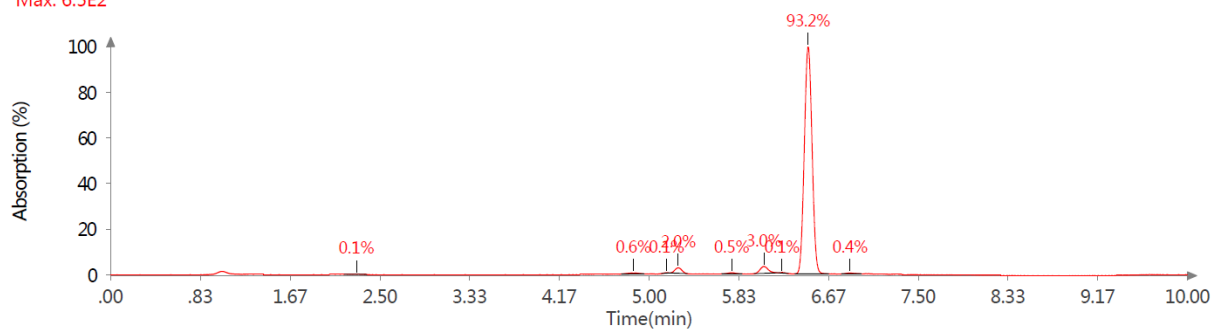

| Time (Peak Maximum M:S/Minutes) | Maximum Absorption (mAU) | Time (Peak Centroid M:S/Minutes) | Peak Area | % Peak Area | Peak Resolution | Label |
|---------------------------------|--------------------------|----------------------------------|-----------|-------------|-----------------|-------|
| 2.28                            | 5.2E-1                   | 2.28                             | 3.4E0     | 0.1         | 6.8             |       |
| 4.85                            | 2.8E0                    | 4.85                             | 2E1       | 0.6         | 7.4             |       |
| 5.16                            | 1.1E0                    | 5.16                             | 3E0       | 0.1         | 4.0             |       |
| 5.27                            | 1.6E1                    | 5.27                             | 7E1       | 2.0         | 4.3             |       |
| 5.77                            | 3.1E0                    | 5.77                             | 1.6E1     | 0.5         | 4.9             |       |
| 6.07                            | 2E1                      | 6.07                             | 1E2       | 3.0         | 4.9             |       |
| 6.23                            | 1.2E0                    | 6.24                             | 4.2E0     | 0.1         | 5.6             |       |
| 6.47                            | 6.5E2                    | 6.48                             | 3.2E3     | 93.2        | 4.7             |       |
| 6.86                            | 2.5E0                    | 6.87                             | 1.3E1     | 0.4         | 5.1             |       |
